# Supplementary material for: Gene essentiality landscape and druggable oncogenic dependencies in herpesviral primary effusion lymphoma
Source: Nat Commun. 2018 Aug 15;9:3263. doi: 10.1038/s41467-018-05506-9 (PMC6093911; doi:10.1038/s41467-018-05506-9)
Supplement: Supplementary file 6 — Supplementary Data 4 [file 41467_2018_5506_MOESM6_ESM.xlsx]

## Sheet: BC-1
id	num	neg|score	neg|p-value	neg|fdr	neg|rank	neg|goodsgrna	neg|lfc	pos|score	pos|p-value	pos|fdr	pos|rank	pos|goodsgrna	pos|lfc
RPS13	4	9.1535e-09	2.6215e-07	0.00055	1	4	-4.2304	1	1	1	18825	0	-4.2304
NXF1	4	3.9261e-08	2.6215e-07	0.00055	2	4	-2.4403	1	1	1	18884	0	-2.4403
CCND2	4	4.0609e-08	2.6215e-07	0.00055	3	4	-2.8277	1	1	1	18883	0	-2.8277
NUTF2	4	4.8495e-08	2.6215e-07	0.00055	4	3	-3.9047	0.076977	0.17267	0.877634	3712	1	-3.9047
DPH3	4	6.5061e-08	2.6215e-07	0.00055	5	4	-3.0077	1	1	1	18882	0	-3.0077
RPL6	4	7.9765e-08	2.6215e-07	0.00055	6	4	-3.0352	1	1	1	18881	0	-3.0352
HSPA5	4	9.1143e-08	2.6215e-07	0.00055	7	4	-3.3787	1	1	1	18880	0	-3.3787
RPL19	4	9.1421e-08	2.6215e-07	0.00055	8	4	-2.7328	1	1	1	18879	0	-2.7328
RPS4X	4	9.5097e-08	2.6215e-07	0.00055	9	4	-2.6679	1	1	1	18878	0	-2.6679
EARS2	4	1.4523e-07	7.8646e-07	0.001142	10	4	-2.5237	1	1	1	18877	0	-2.5237
LOC100507462	4	1.6451e-07	7.8646e-07	0.001142	11	4	-4.4276	0.99164	0.99167	1	17487	0	-4.4276
IMP3	4	1.7897e-07	7.8646e-07	0.001142	12	4	-2.9306	1	1	1	18876	0	-2.9306
PSMA5	4	2.0114e-07	7.8646e-07	0.001142	13	4	-3.2909	1	1	1	18875	0	-3.2909
C10orf2	4	2.0932e-07	1.3108e-06	0.001361	14	4	-2.6422	1	1	1	18874	0	-2.6422
KIF11	4	2.0983e-07	1.3108e-06	0.001361	15	4	-3.2278	1	1	1	18873	0	-3.2278
PSMD12	4	2.6495e-07	1.3108e-06	0.001361	16	4	-2.6165	1	1	1	18872	0	-2.6165
RUVBL1	4	2.7436e-07	1.3108e-06	0.001361	17	4	-3.4117	1	1	1	18871	0	-3.4117
RPL17-C18orf32	4	3.1101e-07	1.8351e-06	0.001361	18	4	-3.2301	1	1	1	18870	0	-3.2301
CCDC84	4	3.3395e-07	1.8351e-06	0.001361	19	4	-2.4096	1	1	1	18869	0	-2.4096
EIF4E	4	3.3839e-07	1.8351e-06	0.001361	20	4	-2.4362	1	1	1	18868	0	-2.4362
NHP2	4	4.0106e-07	2.3594e-06	0.001361	21	4	-3.1044	1	1	1	18867	0	-3.1044
NOP56	4	4.8556e-07	2.3594e-06	0.001361	22	4	-3.0205	1	1	1	18866	0	-3.0205
RPS18	4	4.9836e-07	2.3594e-06	0.001361	23	4	-2.7299	1	1	1	18865	0	-2.7299
NDUFA1	4	5.2885e-07	2.3594e-06	0.001361	24	4	-2.6246	1	1	1	18864	0	-2.6246
SNRNP25	4	5.5532e-07	2.3594e-06	0.001361	25	4	-2.376	1	1	1	18863	0	-2.376
PRMT1	4	5.7751e-07	2.3594e-06	0.001361	26	4	-2.8519	0.99999	0.99999	1	18755	0	-2.8519
TAF1C	4	5.9857e-07	2.3594e-06	0.001361	27	4	-2.3368	1	1	1	18862	0	-2.3368
HSPE1	4	6.371e-07	2.3594e-06	0.001361	28	4	-3.6797	1	1	1	18861	0	-3.6797
FAU	4	6.7746e-07	2.8837e-06	0.001361	29	4	-2.5343	1	1	1	18860	0	-2.5343
NOL10	4	6.838e-07	2.8837e-06	0.001361	30	4	-3.2611	0.99998	0.99998	1	18644	0	-3.2611
RPL11	4	6.9642e-07	2.8837e-06	0.001361	31	4	-2.6802	1	1	1	18859	0	-2.6802
NPIPB3	4	7.1188e-07	2.8837e-06	0.001361	32	4	-2.3734	1	1	1	18858	0	-2.3734
PLK1	4	7.8186e-07	2.8837e-06	0.001361	33	4	-2.4113	1	1	1	18857	0	-2.4113
AP2S1	4	8.4057e-07	2.8837e-06	0.001361	34	4	-1.9842	1	1	1	18856	0	-1.9842
SLC2A1	4	8.7644e-07	2.8837e-06	0.001361	35	4	-2.1262	1	1	1	18855	0	-2.1262
MCL1	4	8.8253e-07	2.8837e-06	0.001361	36	4	-2.8684	1	1	1	18854	0	-2.8684
GEMIN8	4	8.8405e-07	2.8837e-06	0.001361	37	4	-1.7967	1	1	1	18853	0	-1.7967
RPL17	4	8.8711e-07	2.8837e-06	0.001361	38	4	-2.4269	1	1	1	18852	0	-2.4269
ATP6AP1	4	8.9018e-07	2.8837e-06	0.001361	39	4	-3.4229	1	1	1	18851	0	-3.4229
RPL23A	4	9.0253e-07	2.8837e-06	0.001361	40	4	-2.35	1	1	1	18850	0	-2.35
SPDYE6	4	9.81e-07	3.408e-06	0.00157	41	4	-2.7501	1	1	1	18849	0	-2.7501
VCP	4	1.1182e-06	4.4566e-06	0.001742	42	4	-2.9467	1	1	1	18848	0	-2.9467
PCNA	4	1.1236e-06	4.4566e-06	0.001742	43	4	-3.1346	1	1	1	18847	0	-3.1346
MCM5	4	1.1439e-06	4.4566e-06	0.001742	44	4	-2.1446	1	1	1	18846	0	-2.1446
MCAT	4	1.2198e-06	4.4566e-06	0.001742	45	4	-1.674	1	1	1	18845	0	-1.674
RPL35A	4	1.2335e-06	4.4566e-06	0.001742	46	4	-2.0379	1	1	1	18844	0	-2.0379
TUFM	4	1.3597e-06	4.9809e-06	0.001742	47	4	-3.4654	1	1	1	18843	0	-3.4654
HSPA8	4	1.3788e-06	4.9809e-06	0.001742	48	4	-2.37	1	1	1	18842	0	-2.37
SMU1	4	1.3831e-06	4.9809e-06	0.001742	49	4	-3.3464	1	1	1	18841	0	-3.3464
SARS2	4	1.3981e-06	4.9809e-06	0.001742	50	4	-2.2252	1	1	1	18840	0	-2.2252
TKT	4	1.484e-06	4.9809e-06	0.001742	51	4	-1.8926	1	1	1	18839	0	-1.8926
IRF4	4	1.4863e-06	4.9809e-06	0.001742	52	4	-2.6662	1	1	1	18838	0	-2.6662
GFM1	4	1.5412e-06	4.9809e-06	0.001742	53	4	-2.0955	1	1	1	18837	0	-2.0955
ZNF626	4	1.5433e-06	4.9809e-06	0.001742	54	4	-3.6813	0.99993	0.99993	1	18499	0	-3.6813
POP1	4	1.5904e-06	5.5052e-06	0.001762	55	4	-2.0311	1	1	1	18836	0	-2.0311
RPUSD4	4	1.5928e-06	5.5052e-06	0.001762	56	4	-2.1957	1	1	1	18835	0	-2.1957
GART	4	1.6825e-06	5.5052e-06	0.001762	57	4	-2.7348	1	1	1	18834	0	-2.7348
RANGAP1	4	1.695e-06	5.5052e-06	0.001762	58	4	-2.5337	1	1	1	18833	0	-2.5337
NELFCD	4	1.7175e-06	5.5052e-06	0.001762	59	4	-3.0918	1	1	1	18832	0	-3.0918
PSMB4	4	1.8361e-06	6.0295e-06	0.001867	60	4	-2.2212	1	1	1	18831	0	-2.2212
ISY1	4	1.8493e-06	6.0295e-06	0.001867	61	4	-2.0246	1	1	1	18830	0	-2.0246
RPL37	4	1.9136e-06	6.5538e-06	0.001934	62	4	-3.426	1	0.99999	1	18780	0	-3.426
UQCRC1	4	1.9496e-06	6.5538e-06	0.001934	63	4	-1.5414	1	1	1	18829	0	-1.5414
ARMC7	4	1.9524e-06	6.5538e-06	0.001934	64	4	-2.0515	1	1	1	18828	0	-2.0515
RPP21	4	2.0568e-06	7.0781e-06	0.00194	65	4	-2.2506	1	1	1	18827	0	-2.2506
RPL13	4	2.0597e-06	7.0781e-06	0.00194	66	4	-2.8716	1	1	1	18826	0	-2.8716
CENPM	4	2.1714e-06	7.6024e-06	0.00194	67	4	-2.7259	1	1	1	18824	0	-2.7259
DUT	4	2.1872e-06	7.6024e-06	0.00194	68	3	-3.6108	0.3117	0.45405	1	8278	1	-3.6108
RPS3A	4	2.273e-06	7.6024e-06	0.00194	69	4	-2.7772	0.99831	0.99829	1	17924	0	-2.7772
C14orf80	4	2.2938e-06	7.6024e-06	0.00194	70	4	-2.4478	1	1	1	18823	0	-2.4478
POLR3K	4	2.3001e-06	7.6024e-06	0.00194	71	4	-2.3911	1	1	1	18822	0	-2.3911
GNL3	4	2.3697e-06	7.6024e-06	0.00194	72	4	-2.906	1	1	1	18821	0	-2.906
SNRPD3	4	2.3729e-06	7.6024e-06	0.00194	73	4	-3.8012	1	1	1	18820	0	-3.8012
EP300	4	2.4084e-06	7.6024e-06	0.00194	74	4	-2.0661	1	1	1	18819	0	-2.0661
GPN1	4	2.4246e-06	8.1267e-06	0.001943	75	4	-2.1138	1	1	1	18818	0	-2.1138
IMP4	4	2.4705e-06	8.1267e-06	0.001943	76	4	-2.4179	1	1	1	18817	0	-2.4179
POLR2L	4	2.4804e-06	8.1267e-06	0.001943	77	4	-3.0458	1	1	1	18816	0	-3.0458
SFPQ	4	2.4857e-06	8.1267e-06	0.001943	78	4	-4.044	1	0.99999	1	18791	0	-4.044
NOP16	4	2.5672e-06	8.1267e-06	0.001943	79	3	-2.7719	0.92822	0.92836	1	15999	0	-2.7719
IARS2	4	2.619e-06	8.651e-06	0.002017	80	4	-2.7671	1	1	1	18815	0	-2.7671
STX4	4	2.6259e-06	8.651e-06	0.002017	81	4	-2.3784	1	1	1	18814	0	-2.3784
RPL8	4	2.9211e-06	1.0748e-05	0.002421	82	4	-3.0722	1	1	1	18813	0	-3.0722
PPP1R11	4	2.9739e-06	1.0748e-05	0.002421	83	4	-2.5217	1	1	1	18812	0	-2.5217
DAD1	4	3.0158e-06	1.1273e-05	0.002421	84	4	-3.5066	1	1	1	18811	0	-3.5066
LSM4	4	3.0943e-06	1.1797e-05	0.002421	85	3	-3.2074	0.92065	0.92075	1	15845	0	-3.2074
ANAPC1	4	3.1011e-06	1.1797e-05	0.002421	86	4	-1.832	1	1	1	18810	0	-1.832
CSTF3	4	3.1247e-06	1.1797e-05	0.002421	87	4	-2.1843	1	1	1	18809	0	-2.1843
METAP2	4	3.1563e-06	1.1797e-05	0.002421	88	4	-1.8847	1	1	1	18808	0	-1.8847
MRPL17	4	3.2122e-06	1.1797e-05	0.002421	89	4	-2.0147	1	1	1	18807	0	-2.0147
HUWE1	4	3.2445e-06	1.1797e-05	0.002421	90	4	-1.9826	1	1	1	18806	0	-1.9826
LUC7L3	4	3.2486e-06	1.1797e-05	0.002421	91	4	-1.9146	1	1	1	18805	0	-1.9146
KPNB1	4	3.2893e-06	1.1797e-05	0.002421	92	4	-2.7198	1	1	1	18804	0	-2.7198
RPS11	4	3.5263e-06	1.2321e-05	0.002502	93	4	-3.0448	0.99998	0.99998	1	18665	0	-3.0448
SPATA5L1	4	3.638e-06	1.2845e-05	0.002581	94	4	-2.3923	1	1	1	18803	0	-2.3923
G6PD	4	3.7587e-06	1.337e-05	0.00263	95	4	-2.1557	1	1	1	18802	0	-2.1557
DDX54	4	3.795e-06	1.337e-05	0.00263	96	4	-3.0098	1	1	1	18801	0	-3.0098
NARFL	4	3.827e-06	1.4156e-05	0.002687	97	4	-2.1212	1	1	1	18800	0	-2.1212
ATP5A1	4	3.8407e-06	1.4418e-05	0.002687	98	4	-2.7521	1	1	1	18799	0	-2.7521
BUB3	4	3.9523e-06	1.4418e-05	0.002687	99	4	-2.4141	1	1	1	18798	0	-2.4141
CIAO1	4	3.9758e-06	1.4418e-05	0.002687	100	4	-2.6681	1	1	1	18797	0	-2.6681
NOB1	4	4.0327e-06	1.4418e-05	0.002687	101	4	-1.8495	1	1	1	18796	0	-1.8495
RPS15A	4	4.0375e-06	1.4943e-05	0.002687	102	4	-2.5517	1	1	1	18795	0	-2.5517
PRPF19	4	4.1484e-06	1.4943e-05	0.002687	103	4	-2.3355	1	1	1	18794	0	-2.3355
PSMB2	4	4.1679e-06	1.4943e-05	0.002687	104	4	-3.0995	1	1	1	18793	0	-3.0995
SAMM50	4	4.2072e-06	1.4943e-05	0.002687	105	4	-2.6732	1	0.99999	1	18792	0	-2.6732
MRPS16	4	4.2715e-06	1.5467e-05	0.002755	106	4	-2.4885	1	0.99999	1	18790	0	-2.4885
COPA	4	4.3216e-06	1.5991e-05	0.002822	107	4	-1.8864	1	0.99999	1	18789	0	-1.8864
HSPD1	4	4.3546e-06	1.6516e-05	0.002861	108	4	-3.1885	0.99999	0.99999	1	18762	0	-3.1885
KARS	4	4.4025e-06	1.6516e-05	0.002861	109	4	-1.9314	1	0.99999	1	18788	0	-1.9314
RPL9	4	4.4899e-06	1.704e-05	0.002899	110	4	-2.6981	0.99995	0.99995	1	18553	0	-2.6981
MAT2A	4	4.4949e-06	1.704e-05	0.002899	111	4	-3.16	1	0.99999	1	18787	0	-3.16
STRAP	4	4.5416e-06	1.7564e-05	0.002932	112	4	-2.6784	1	0.99999	1	18786	0	-2.6784
GNB2L1	4	4.5573e-06	1.7564e-05	0.002932	113	4	-3.1893	1	0.99999	1	18785	0	-3.1893
SRSF1	4	4.5887e-06	1.8089e-05	0.002932	114	4	-3.207	1	0.99999	1	18784	0	-3.207
ITPK1	4	4.6151e-06	1.8089e-05	0.002932	115	4	-2.3303	1	0.99999	1	18783	0	-2.3303
PSMG3	4	4.6468e-06	1.8089e-05	0.002932	116	4	-2.3861	1	0.99999	1	18782	0	-2.3861
RFC2	4	4.7484e-06	1.8613e-05	0.002932	117	4	-1.5967	1	0.99999	1	18781	0	-1.5967
MRPL41	4	4.9733e-06	1.9661e-05	0.002932	118	4	-2.2809	1	0.99999	1	18779	0	-2.2809
POLR3H	4	5.0013e-06	1.9661e-05	0.002932	119	4	-3.3325	0.99999	0.99999	1	18778	0	-3.3325
EIF2B3	4	5.12e-06	1.9661e-05	0.002932	120	4	-2.5059	0.99999	0.99999	1	18777	0	-2.5059
YARS2	4	5.1371e-06	1.9661e-05	0.002932	121	4	-2.9969	0.99999	0.99999	1	18776	0	-2.9969
MED8	4	5.235e-06	1.9661e-05	0.002932	122	4	-2.251	0.99999	0.99999	1	18775	0	-2.251
EIF6	4	5.2816e-06	1.9661e-05	0.002932	123	4	-2.2985	0.99999	0.99999	1	18774	0	-2.2985
RPS27	4	5.3108e-06	2.0186e-05	0.002932	124	4	-2.648	0.99999	0.99999	1	18773	0	-2.648
RPS8	4	5.4053e-06	2.0186e-05	0.002932	125	4	-3.7605	0.99999	0.99999	1	18772	0	-3.7605
NUS1	4	5.447e-06	2.0186e-05	0.002932	126	4	-2.3562	0.99999	0.99999	1	18771	0	-2.3562
MARCH5	4	5.4529e-06	2.0186e-05	0.002932	127	4	-1.7975	0.99999	0.99999	1	18770	0	-1.7975
IPO13	4	5.4949e-06	2.0186e-05	0.002932	128	4	-1.5486	0.99999	0.99999	1	18769	0	-1.5486
MAK16	4	5.5009e-06	2.0186e-05	0.002932	129	4	-1.9811	0.99999	0.99999	1	18768	0	-1.9811
GLRX5	4	5.5371e-06	2.0186e-05	0.002932	130	4	-2.3419	0.99999	0.99999	1	18767	0	-2.3419
DNM2	4	5.6899e-06	2.1234e-05	0.002992	131	4	-2.2733	0.99999	0.99999	1	18766	0	-2.2733
PWP2	4	5.6961e-06	2.1234e-05	0.002992	132	4	-2.2484	0.99999	0.99999	1	18765	0	-2.2484
NAPA	4	5.7147e-06	2.1234e-05	0.002992	133	4	-2.5471	0.99999	0.99999	1	18764	0	-2.5471
TOP2A	4	5.7395e-06	2.1234e-05	0.002992	134	4	-2.4672	0.99999	0.99999	1	18763	0	-2.4672
DKC1	4	5.8395e-06	2.1759e-05	0.003044	135	4	-3.2018	0.99999	0.99999	1	18761	0	-3.2018
MFN2	4	6.0436e-06	2.2807e-05	0.003167	136	4	-1.8717	0.99999	0.99999	1	18760	0	-1.8717
MRPL34	4	6.1542e-06	2.3332e-05	0.00317	137	4	-1.8296	0.99999	0.99999	1	18759	0	-1.8296
MED12	4	6.2939e-06	2.3332e-05	0.00317	138	4	-2.7952	0.99974	0.99975	1	18306	0	-2.7952
VPS13D	4	6.3262e-06	2.3332e-05	0.00317	139	4	-2.0431	0.99999	0.99999	1	18758	0	-2.0431
SKA2	4	6.4338e-06	2.3856e-05	0.003218	140	4	-1.848	0.99999	0.99999	1	18757	0	-1.848
UBL5	4	6.591e-06	2.5429e-05	0.003406	141	4	-2.6912	0.99999	0.99999	1	18756	0	-2.6912
PES1	4	6.6644e-06	2.5953e-05	0.003451	142	4	-2.2396	0.99999	0.99999	1	18748	0	-2.2396
TRMT112	4	6.9345e-06	2.7002e-05	0.003512	143	4	-2.6954	0.99998	0.99998	1	18640	0	-2.6954
SKIV2L2	4	6.9712e-06	2.7002e-05	0.003512	144	4	-3.0391	0.99999	0.99999	1	18754	0	-3.0391
FDX1L	4	7.0506e-06	2.7526e-05	0.003512	145	4	-2.6071	0.99999	0.99999	1	18753	0	-2.6071
BANP	4	7.0722e-06	2.7526e-05	0.003512	146	4	-3.0733	0.99746	0.99744	1	17827	0	-3.0733
RUVBL2	4	7.0942e-06	2.7526e-05	0.003512	147	4	-3.0259	0.99999	0.99999	1	18752	0	-3.0259
UAP1	4	7.1088e-06	2.7526e-05	0.003512	148	4	-1.4719	0.99999	0.99999	1	18751	0	-1.4719
EXOSC6	4	7.165e-06	2.805e-05	0.003531	149	3	-2.0555	0.35065	0.49437	1	8923	1	-2.0555
RPA3	4	7.2632e-06	2.805e-05	0.003531	150	4	-2.6061	0.99999	0.99999	1	18750	0	-2.6061
CTR9	4	7.2855e-06	2.8575e-05	0.003574	151	4	-1.8475	0.99999	0.99999	1	18749	0	-1.8475
PGS1	4	7.5567e-06	2.9623e-05	0.00368	152	4	-2.4822	0.99999	0.99999	1	18747	0	-2.4822
ORC1	4	7.6026e-06	3.0148e-05	0.003721	153	4	-2.3278	0.99999	0.99999	1	18746	0	-2.3278
DTYMK	4	7.8669e-06	3.1196e-05	0.003825	154	4	-2.0114	0.99999	0.99999	1	18745	0	-2.0114
ORC6	4	8.0495e-06	3.1983e-05	0.003854	155	4	-2.5036	0.99999	0.99999	1	18744	0	-2.5036
ANAPC11	4	8.0622e-06	3.2245e-05	0.003854	156	4	-2.3076	0.99997	0.99997	1	18615	0	-2.3076
RPL7	4	8.0977e-06	3.2245e-05	0.003854	157	4	-1.6686	0.99999	0.99999	1	18743	0	-1.6686
ALAS1	4	8.1218e-06	3.2245e-05	0.003854	158	4	-2.2437	0.99999	0.99999	1	18742	0	-2.2437
TUT1	4	8.2028e-06	3.2769e-05	0.003892	159	4	-1.8302	0.99999	0.99999	1	18741	0	-1.8302
NDUFB4	4	8.3089e-06	3.3293e-05	0.003905	160	4	-2.3989	0.99999	0.99999	1	18740	0	-2.3989
HEATR1	4	8.3912e-06	3.3293e-05	0.003905	161	4	-2.0799	0.99999	0.99999	1	18739	0	-2.0799
PSMB1	4	8.6672e-06	3.3818e-05	0.003918	162	4	-1.8945	0.99999	0.99999	1	18738	0	-1.8945
SNRPD2	4	8.6841e-06	3.3818e-05	0.003918	163	4	-2.0855	0.99999	0.99999	1	18737	0	-2.0855
USP39	4	8.8034e-06	3.4342e-05	0.003954	164	4	-1.882	0.99999	0.99999	1	18736	0	-1.882
POLR2K	4	9.1687e-06	3.5391e-05	0.00405	165	4	-1.6421	0.99999	0.99999	1	18735	0	-1.6421
HMGCS1	4	9.4004e-06	3.5915e-05	0.004061	166	4	-1.9506	0.99999	0.99999	1	18734	0	-1.9506
AHCY	4	9.417e-06	3.5915e-05	0.004061	167	3	-3.2596	0.046004	0.11304	0.822929	2592	1	-3.2596
RBM19	4	9.664e-06	3.6439e-05	0.004096	168	4	-1.9922	0.99999	0.99999	1	18733	0	-1.9922
RPL36	4	9.7655e-06	3.6964e-05	0.004106	169	4	-2.5702	0.99999	0.99999	1	18732	0	-2.5702
DDX23	4	9.8211e-06	3.6964e-05	0.004106	170	4	-1.9042	0.99999	0.99999	1	18731	0	-1.9042
VARS	4	9.9426e-06	3.7488e-05	0.00414	171	4	-2.5314	0.99999	0.99999	1	18730	0	-2.5314
GOLGA6L10	4	1.0037e-05	3.8012e-05	0.004173	172	4	-2.7417	0.99999	0.99999	1	18729	0	-2.7417
PGAM1	4	1.017e-05	3.9061e-05	0.0042	173	4	-1.8039	0.99999	0.99999	1	18728	0	-1.8039
ATF7	4	1.0246e-05	3.9585e-05	0.0042	174	4	-1.1886	0.99999	0.99999	1	18727	0	-1.1886
RRP9	4	1.0265e-05	3.9585e-05	0.0042	175	4	-2.1374	0.99999	0.99999	1	18726	0	-2.1374
MTHFD1	4	1.028e-05	3.9585e-05	0.0042	176	4	-2.6842	0.9999	0.9999	1	18460	0	-2.6842
GINS2	4	1.0285e-05	3.9585e-05	0.0042	177	4	-2.4316	0.99999	0.99999	1	18725	0	-2.4316
AURKB	4	1.041e-05	3.9585e-05	0.0042	178	4	-1.997	0.99999	0.99999	1	18724	0	-1.997
ALAD	4	1.0498e-05	4.0109e-05	0.004216	179	4	-1.8846	0.99999	0.99999	1	18723	0	-1.8846
HAUS5	4	1.0715e-05	4.0634e-05	0.004216	180	4	-2.3107	0.99999	0.99999	1	18722	0	-2.3107
RPL31	4	1.0745e-05	4.0634e-05	0.004216	181	4	-2.4918	0.99999	0.99999	1	18721	0	-2.4918
ZHX1	4	1.0794e-05	4.0634e-05	0.004216	182	4	-1.1318	0.99999	0.99999	1	18720	0	-1.1318
ATP6V1A	4	1.1427e-05	4.378e-05	0.004518	183	4	-1.8257	0.99999	0.99998	1	18719	0	-1.8257
UBE2T	4	1.1447e-05	4.4042e-05	0.00452	184	4	-1.9093	0.99999	0.99998	1	18718	0	-1.9093
SMARCAL1	4	1.1679e-05	4.5877e-05	0.004683	185	4	-1.9618	0.99999	0.99998	1	18717	0	-1.9618
SBNO1	4	1.1913e-05	4.745e-05	0.004792	186	4	-2.6675	0.99999	0.99998	1	18716	0	-2.6675
RABGGTB	4	1.1935e-05	4.745e-05	0.004792	187	4	-2.4745	0.99999	0.99998	1	18715	0	-2.4745
MCM3	4	1.2075e-05	4.8498e-05	0.004871	188	4	-2.2401	0.99999	0.99998	1	18714	0	-2.2401
TRRAP	4	1.2151e-05	4.9023e-05	0.004898	189	4	-2.1782	0.99999	0.99998	1	18713	0	-2.1782
PLK4	4	1.2184e-05	4.9547e-05	0.004924	190	4	-2.1183	0.99999	0.99998	1	18712	0	-2.1183
RPS16	4	1.2395e-05	5.112e-05	0.005021	191	4	-2.292	0.99996	0.99996	1	18578	0	-2.292
NUBP1	4	1.2762e-05	5.2168e-05	0.005021	192	4	-2.3385	0.99999	0.99998	1	18711	0	-2.3385
PHB	4	1.2796e-05	5.2168e-05	0.005021	193	4	-2.063	0.99999	0.99998	1	18710	0	-2.063
GNL3L	4	1.2808e-05	5.2168e-05	0.005021	194	4	-1.3109	0.99999	0.99998	1	18709	0	-1.3109
EIF4G1	4	1.3059e-05	5.2693e-05	0.005021	195	4	-1.9906	0.99999	0.99998	1	18708	0	-1.9906
ATP6V0B	4	1.3105e-05	5.3217e-05	0.005021	196	4	-2.4185	0.99999	0.99998	1	18707	0	-2.4185
ITPA	4	1.3175e-05	5.3217e-05	0.005021	197	4	-1.1668	0.99999	0.99998	1	18706	0	-1.1668
DDX10	4	1.3198e-05	5.3217e-05	0.005021	198	4	-2.7512	0.99999	0.99998	1	18705	0	-2.7512
DTL	4	1.3349e-05	5.3741e-05	0.005021	199	4	-1.8902	0.99999	0.99998	1	18704	0	-1.8902
GOLGA6L1	4	1.3443e-05	5.3741e-05	0.005021	200	4	-2.8168	0.99999	0.99998	1	18703	0	-2.8168
ATP5D	4	1.3609e-05	5.4266e-05	0.005021	201	4	-2.1284	0.99999	0.99998	1	18702	0	-2.1284
MRPS7	4	1.3752e-05	5.4266e-05	0.005021	202	4	-1.0688	0.99999	0.99998	1	18701	0	-1.0688
RABGGTA	4	1.3848e-05	5.479e-05	0.005021	203	4	-2.0025	0.99999	0.99998	1	18700	0	-2.0025
NDC1	4	1.409e-05	5.5314e-05	0.005021	204	4	-1.6293	0.99999	0.99998	1	18699	0	-1.6293
HIST1H4K	4	1.4102e-05	5.5314e-05	0.005021	205	4	-1.6496	0.99999	0.99998	1	18698	0	-1.6496
KCMF1	4	1.4163e-05	5.5314e-05	0.005021	206	4	-1.6303	0.99999	0.99998	1	18697	0	-1.6303
ERCC3	4	1.4185e-05	5.5839e-05	0.005021	207	3	-2.2021	0.7696	0.77447	1	13326	1	-2.2021
FBL	4	1.4444e-05	5.5839e-05	0.005021	208	4	-2.9115	0.99997	0.99996	1	18604	0	-2.9115
GOLGA6C	4	1.4447e-05	5.5839e-05	0.005021	209	4	-1.6225	0.99999	0.99998	1	18696	0	-1.6225
ARFRP1	4	1.4559e-05	5.6363e-05	0.005043	210	4	-2.1799	0.99999	0.99998	1	18695	0	-2.1799
CEP85	4	1.481e-05	5.7411e-05	0.005043	211	4	-1.823	0.99999	0.99998	1	18694	0	-1.823
MRPS21	4	1.4836e-05	5.7411e-05	0.005043	212	4	-2.3031	0.99999	0.99998	1	18693	0	-2.3031
HUS1	4	1.4975e-05	5.7411e-05	0.005043	213	4	-1.5396	0.99999	0.99998	1	18692	0	-1.5396
OGT	4	1.5026e-05	5.7411e-05	0.005043	214	4	-2.5718	0.99998	0.99998	1	18691	0	-2.5718
XPO1	3	1.5105e-05	5.1644e-05	0.005021	215	3	-3.1036	0.99984	0.99984	1	18376	0	-3.1036
GTF2A2	4	1.5193e-05	5.7936e-05	0.005065	216	4	-1.9094	0.99998	0.99998	1	18690	0	-1.9094
RPS10	4	1.5353e-05	5.8984e-05	0.005133	217	3	-3.4268	0.97094	0.97101	1	16881	0	-3.4268
EXOSC4	4	1.5623e-05	6.0033e-05	0.005174	218	4	-1.9634	0.99998	0.99998	1	18689	0	-1.9634
NPIPB6	4	1.5704e-05	6.0557e-05	0.005174	219	4	-2.554	0.99833	0.99831	1	17927	0	-2.554
CDK1	4	1.5742e-05	6.0557e-05	0.005174	220	4	-3.0971	0.99998	0.99998	1	18688	0	-3.0971
RPLP2	4	1.5809e-05	6.0557e-05	0.005174	221	4	-2.2078	0.99998	0.99998	1	18687	0	-2.2078
CENPN	4	1.5969e-05	6.1606e-05	0.005238	222	4	-2.3743	0.99998	0.99998	1	18686	0	-2.3743
EIF2B5	4	1.5982e-05	6.213e-05	0.005238	223	4	-2.3767	0.99998	0.99998	1	18685	0	-2.3767
HARS	4	1.6009e-05	6.213e-05	0.005238	224	4	-2.9212	0.99998	0.99998	1	18684	0	-2.9212
HARS2	4	1.6103e-05	6.2655e-05	0.005259	225	4	-2.2222	0.99998	0.99998	1	18683	0	-2.2222
ORAOV1	4	1.6497e-05	6.58e-05	0.005498	226	4	-1.7931	0.99998	0.99998	1	18682	0	-1.7931
EIF2B4	4	1.6983e-05	6.7898e-05	0.005618	227	4	-1.2597	0.99998	0.99998	1	18681	0	-1.2597
CENPO	4	1.7039e-05	6.8422e-05	0.005618	228	4	-1.6721	0.99998	0.99998	1	18680	0	-1.6721
GPN2	4	1.7067e-05	6.8422e-05	0.005618	229	4	-2.5777	0.99998	0.99998	1	18679	0	-2.5777
ANKRD49	4	1.7076e-05	6.8422e-05	0.005618	230	4	-3.1278	0.99994	0.99994	1	18527	0	-3.1278
EIF3A	4	1.7279e-05	6.8946e-05	0.005636	231	4	-2.1483	0.99998	0.99998	1	18678	0	-2.1483
MCM7	4	1.7706e-05	7.1568e-05	0.005718	232	4	-2.095	0.99991	0.99991	1	18471	0	-2.095
RPS6	4	1.7781e-05	7.1568e-05	0.005718	233	4	-2.9106	0.99998	0.99998	1	18677	0	-2.9106
GFPT1	4	1.781e-05	7.1568e-05	0.005718	234	4	-3.5273	0.99998	0.99998	1	18676	0	-3.5273
XPO5	4	1.8059e-05	7.2616e-05	0.005718	235	4	-2.0363	0.99998	0.99998	1	18675	0	-2.0363
DNAJC11	4	1.8103e-05	7.2616e-05	0.005718	236	4	-1.7238	0.99998	0.99998	1	18674	0	-1.7238
UROD	4	1.8221e-05	7.3141e-05	0.005718	237	4	-1.9448	0.99998	0.99998	1	18673	0	-1.9448
MARS2	4	1.825e-05	7.3141e-05	0.005718	238	4	-2.0793	0.99998	0.99998	1	18672	0	-2.0793
EIF3CL	4	1.8369e-05	7.3665e-05	0.005718	239	4	-2.3804	0.99998	0.99998	1	18671	0	-2.3804
PSMA6	4	1.8395e-05	7.3665e-05	0.005718	240	4	-3.0068	0.99993	0.99993	1	18502	0	-3.0068
RPSA	4	1.857e-05	7.3665e-05	0.005718	241	3	-3.4661	0.36018	0.50415	1	9069	1	-3.4661
RNPS1	4	1.8593e-05	7.3665e-05	0.005718	242	4	-1.4067	0.99998	0.99998	1	18670	0	-1.4067
NDUFB8	4	1.8683e-05	7.4189e-05	0.005718	243	4	-2.5641	0.99998	0.99998	1	18669	0	-2.5641
ATP1A1	4	1.8702e-05	7.4189e-05	0.005718	244	4	-3.2909	0.9983	0.99829	1	17921	0	-3.2909
DHX37	4	1.8895e-05	7.4189e-05	0.005718	245	4	-2.3425	0.99998	0.99998	1	18668	0	-2.3425
NDUFB7	4	1.9017e-05	7.4714e-05	0.005735	246	4	-1.7279	0.99998	0.99998	1	18667	0	-1.7279
CHERP	4	1.9588e-05	7.7335e-05	0.005913	247	4	-1.6333	0.99998	0.99998	1	18666	0	-1.6333
SMC1A	4	2.006e-05	8.0481e-05	0.006094	248	4	-1.5982	0.99998	0.99998	1	18664	0	-1.5982
IPPK	4	2.0155e-05	8.1005e-05	0.006094	249	4	-2.5113	0.99998	0.99998	1	18663	0	-2.5113
MRPL21	4	2.0203e-05	8.1005e-05	0.006094	250	4	-1.2097	0.99998	0.99998	1	18662	0	-1.2097
TOMM40	4	2.0299e-05	8.1005e-05	0.006094	251	4	-1.6986	0.99998	0.99998	1	18661	0	-1.6986
RPS17	4	2.0476e-05	8.153e-05	0.00611	252	4	-1.7979	0.99998	0.99998	1	18660	0	-1.7979
PPP4C	4	2.0784e-05	8.3627e-05	0.006242	253	4	-3.0785	0.99998	0.99998	1	18659	0	-3.0785
PHAX	4	2.0964e-05	8.4675e-05	0.006295	254	4	-2.1527	0.99998	0.99998	1	18658	0	-2.1527
USO1	4	2.1228e-05	8.52e-05	0.006309	255	4	-2.2308	0.99998	0.99998	1	18657	0	-2.2308
AP2M1	4	2.1295e-05	8.5724e-05	0.006316	256	4	-2.0283	0.99998	0.99998	1	18656	0	-2.0283
RPS27A	4	2.1411e-05	8.6773e-05	0.006316	257	4	-1.9973	0.99998	0.99998	1	18655	0	-1.9973
GOLGA6L4	4	2.1445e-05	8.6773e-05	0.006316	258	4	-1.7613	0.99998	0.99998	1	18654	0	-1.7613
PGD	4	2.1495e-05	8.6773e-05	0.006316	259	4	-2.4583	0.99998	0.99998	1	18653	0	-2.4583
RPS29	4	2.1631e-05	8.7297e-05	0.006316	260	4	-2.6203	0.99944	0.99945	1	18169	0	-2.6203
ISCA2	4	2.1646e-05	8.7297e-05	0.006316	261	4	-2.0191	0.99998	0.99998	1	18652	0	-2.0191
RPTOR	4	2.2309e-05	9.0443e-05	0.006519	262	4	-2.2571	0.99998	0.99998	1	18651	0	-2.2571
NEDD8	4	2.2568e-05	9.0967e-05	0.006532	263	4	-1.9348	0.99998	0.99998	1	18650	0	-1.9348
RAN	4	2.2852e-05	9.2016e-05	0.006582	264	4	-3.7623	0.9991	0.9991	1	18070	0	-3.7623
RPS24	4	2.3129e-05	9.3589e-05	0.006644	265	4	-2.9021	0.99998	0.99998	1	18649	0	-2.9021
HMBS	4	2.3146e-05	9.3589e-05	0.006644	266	4	-1.8602	0.99998	0.99998	1	18648	0	-1.8602
NDUFV1	4	2.3324e-05	9.4113e-05	0.006656	267	4	-2.2164	0.99998	0.99998	1	18647	0	-2.2164
KIAA1429	4	2.3413e-05	9.4637e-05	0.006665	268	4	-1.8442	0.99998	0.99998	1	18646	0	-1.8442
XAB2	4	2.352e-05	9.5161e-05	0.006665	269	4	-1.9159	0.99998	0.99998	1	18645	0	-1.9159
DOLK	4	2.3663e-05	9.5686e-05	0.006665	270	4	-2.0416	0.99998	0.99998	1	18643	0	-2.0416
DOHH	4	2.3772e-05	9.621e-05	0.006665	271	4	-1.5832	0.99998	0.99998	1	18642	0	-1.5832
POLD2	4	2.4043e-05	9.7259e-05	0.006665	272	4	-2.783	0.99998	0.99998	1	18641	0	-2.783
RPL27A	4	2.4136e-05	9.7259e-05	0.006665	273	4	-2.8206	0.99371	0.99374	1	17579	0	-2.8206
ADSL	4	2.4428e-05	9.7783e-05	0.006665	274	4	-2.4394	0.99998	0.99998	1	18639	0	-2.4394
RPS20	4	2.452e-05	9.7783e-05	0.006665	275	4	-2.0888	0.99998	0.99998	1	18638	0	-2.0888
RPLP0	4	2.4556e-05	9.7783e-05	0.006665	276	4	-2.3762	0.9961	0.99609	1	17711	0	-2.3762
GTF2H3	4	2.4661e-05	9.8832e-05	0.006665	277	3	-2.2035	0.84982	0.8497	1	14590	0	-2.2035
MRPS14	4	2.4821e-05	9.8832e-05	0.006665	278	3	-2.7834	0.4209	0.56702	1	10021	1	-2.7834
AURKAIP1	4	2.5022e-05	9.9356e-05	0.006665	279	4	-1.7162	0.99997	0.99998	1	18637	0	-1.7162
SIN3A	4	2.5191e-05	9.9356e-05	0.006665	280	4	-1.7447	0.99997	0.99998	1	18636	0	-1.7447
EMG1	4	2.521e-05	9.9356e-05	0.006665	281	4	-1.9123	0.99997	0.99998	1	18635	0	-1.9123
LRRC37A	4	2.5356e-05	9.988e-05	0.006665	282	4	-2.5108	0.99184	0.99186	1	17497	0	-2.5108
NDUFA11	4	2.5494e-05	9.988e-05	0.006665	283	4	-2.0783	0.99997	0.99998	1	18634	0	-2.0783
RBX1	4	2.5551e-05	0.0001004	0.006676	284	4	-1.7909	0.99997	0.99998	1	18633	0	-1.7909
ALDOA	4	2.5573e-05	0.00010093	0.006688	285	4	-1.9755	0.99992	0.99992	1	18495	0	-1.9755
PTPMT1	4	2.5685e-05	0.00010145	0.006699	286	4	-2.1108	0.99997	0.99998	1	18632	0	-2.1108
RPL18A	4	2.6478e-05	0.00010539	0.006914	287	4	-2.1782	0.99997	0.99997	1	18631	0	-2.1782
CRNKL1	4	2.6556e-05	0.00010565	0.006914	288	4	-2.2554	0.99997	0.99997	1	18630	0	-2.2554
TPI1	4	2.6772e-05	0.00010617	0.006914	289	4	-1.3407	0.99997	0.99997	1	18629	0	-1.3407
EIF4A1	4	2.6931e-05	0.00010617	0.006914	290	4	-2.5167	0.99997	0.99997	1	18628	0	-2.5167
GTF2H1	4	2.759e-05	0.00010932	0.007013	291	4	-1.4624	0.99997	0.99997	1	18627	0	-1.4624
ATP5O	4	2.7631e-05	0.00010932	0.007013	292	4	-1.5863	0.99997	0.99997	1	18626	0	-1.5863
AK2	4	2.7633e-05	0.00010932	0.007013	293	4	-2.6578	0.99996	0.99996	1	18569	0	-2.6578
HSPA9	4	2.7691e-05	0.00010932	0.007013	294	4	-1.5585	0.99997	0.99997	1	18625	0	-1.5585
MRPS34	4	2.7833e-05	0.00010984	0.007013	295	4	-2.2211	0.99997	0.99997	1	18624	0	-2.2211
POLE2	4	2.7935e-05	0.00011037	0.007013	296	4	-1.3823	0.99997	0.99997	1	18623	0	-1.3823
RPL10	4	2.8201e-05	0.00011141	0.007013	297	4	-3.1547	0.99997	0.99997	1	18622	0	-3.1547
PRIM1	4	2.8242e-05	0.00011141	0.007013	298	4	-2.2838	0.99997	0.99997	1	18621	0	-2.2838
HIST1H4J	4	2.8427e-05	0.00011141	0.007013	299	4	-1.7848	0.99997	0.99997	1	18620	0	-1.7848
DNA2	4	2.853e-05	0.00011141	0.007013	300	4	-1.8835	0.99997	0.99997	1	18619	0	-1.8835
CAPZB	4	2.8592e-05	0.00011194	0.007023	301	4	-2.5037	0.99997	0.99997	1	18618	0	-2.5037
SNRPF	4	2.8988e-05	0.00011273	0.007049	302	4	-3.0076	0.99997	0.99997	1	18617	0	-3.0076
FAM231A	4	2.9093e-05	0.00011404	0.007107	303	4	-1.6879	0.99997	0.99997	1	18616	0	-1.6879
YARS	4	2.96e-05	0.00011561	0.007181	304	4	-2.5145	0.99997	0.99997	1	18614	0	-2.5145
THOC3	4	3.059e-05	0.00011771	0.007266	305	4	-2.1041	0.99997	0.99997	1	18613	0	-2.1041
TIMELESS	4	3.0709e-05	0.00011823	0.007266	306	4	-2.7091	0.99973	0.99973	1	18299	0	-2.7091
MRPL44	4	3.0919e-05	0.00011823	0.007266	307	4	-1.8048	0.99997	0.99997	1	18612	0	-1.8048
NOP58	4	3.1264e-05	0.00011928	0.007266	308	4	-2.5897	0.99952	0.99951	1	18200	0	-2.5897
NDUFS2	4	3.1338e-05	0.00011928	0.007266	309	4	-2.3696	0.99997	0.99997	1	18611	0	-2.3696
HMGCR	4	3.1405e-05	0.00011928	0.007266	310	4	-2.0097	0.99997	0.99997	1	18610	0	-2.0097
OR4F4	4	3.2213e-05	0.000124	0.007529	311	4	-1.5349	0.99997	0.99997	1	18609	0	-1.5349
ARHGEF35	4	3.2463e-05	0.00012505	0.007569	312	4	-1.2404	0.99997	0.99997	1	18608	0	-1.2404
POLR3E	4	3.2554e-05	0.00012557	0.007576	313	4	-1.6172	0.99997	0.99997	1	18607	0	-1.6172
PSMA7	4	3.2967e-05	0.0001261	0.007583	314	4	-2.7997	0.99986	0.99986	1	18394	0	-2.7997
DHX8	4	3.3688e-05	0.00012872	0.007692	315	4	-2.2146	0.99997	0.99996	1	18606	0	-2.2146
NSL1	4	3.3735e-05	0.00012872	0.007692	316	4	-2.0416	0.99997	0.99996	1	18605	0	-2.0416
WASH1	4	3.4112e-05	0.00013029	0.007762	317	4	-3.4655	0.99997	0.99996	1	18603	0	-3.4655
ACTR10	4	3.4444e-05	0.00013291	0.007773	318	4	-1.5067	0.99997	0.99996	1	18602	0	-1.5067
PRPF8	4	3.4587e-05	0.00013344	0.007773	319	4	-2.5351	0.99997	0.99996	1	18601	0	-2.5351
GFER	4	3.4731e-05	0.00013344	0.007773	320	4	-2.7452	0.99997	0.99996	1	18600	0	-2.7452
MYC	4	3.4803e-05	0.00013344	0.007773	321	4	-2.8981	0.99997	0.99996	1	18599	0	-2.8981
EFTUD2	4	3.5019e-05	0.00013396	0.007773	322	4	-2.5655	0.99996	0.99996	1	18598	0	-2.5655
TIMM10	4	3.5068e-05	0.00013396	0.007773	323	4	-2.3809	0.99996	0.99996	1	18597	0	-2.3809
CNOT3	4	3.5092e-05	0.00013396	0.007773	324	4	-2.3041	0.99996	0.99996	1	18596	0	-2.3041
WDHD1	4	3.5199e-05	0.00013448	0.007773	325	4	-3.1251	0.9957	0.99568	1	17682	0	-3.1251
PMPCB	4	3.5383e-05	0.00013448	0.007773	326	4	-1.327	0.99996	0.99996	1	18595	0	-1.327
C2orf27B	4	3.54e-05	0.00013475	0.007773	327	3	-2.9448	0.22249	0.36191	0.992651	6884	1	-2.9448
CTC1	4	3.5553e-05	0.00013501	0.007773	328	4	-1.9611	0.99996	0.99996	1	18594	0	-1.9611
EIF2S1	4	3.5577e-05	0.00013553	0.007779	329	4	-2.2121	0.99996	0.99996	1	18593	0	-2.2121
PTCD3	4	3.6315e-05	0.0001392	0.007924	330	4	-2.0044	0.99996	0.99996	1	18592	0	-2.0044
UBE2Q1	4	3.644e-05	0.0001392	0.007924	331	4	-1.7647	0.99996	0.99996	1	18591	0	-1.7647
TAF6L	4	3.6589e-05	0.00013973	0.007924	332	4	-1.5254	0.99996	0.99996	1	18590	0	-1.5254
TIMMDC1	4	3.6639e-05	0.00013973	0.007924	333	4	-1.9897	0.99996	0.99996	1	18589	0	-1.9897
GOSR2	4	3.6889e-05	0.00014078	0.007947	334	4	-1.3261	0.99996	0.99996	1	18588	0	-1.3261
EIF3C	4	3.6939e-05	0.0001413	0.007947	335	4	-3.1804	0.99996	0.99996	1	18587	0	-3.1804
SETDB1	4	3.7267e-05	0.00014182	0.007947	336	4	-1.5589	0.99996	0.99996	1	18586	0	-1.5589
LIPT1	4	3.7292e-05	0.00014182	0.007947	337	4	-1.1343	0.99996	0.99996	1	18585	0	-1.1343
PPCS	4	3.7571e-05	0.00014235	0.007953	338	4	-1.7925	0.99996	0.99996	1	18584	0	-1.7925
MED14	4	3.8159e-05	0.00014392	0.008017	339	4	-1.7803	0.99996	0.99996	1	18583	0	-1.7803
RPL21	4	3.8374e-05	0.00014602	0.008086	340	4	-2.4033	0.99996	0.99996	1	18581	0	-2.4033
NFKB1	4	3.8391e-05	0.00014602	0.008086	341	4	-1.3708	0.99996	0.99996	1	18582	0	-1.3708
RPL27	4	3.8807e-05	0.00014864	0.008207	342	4	-3.1013	0.99996	0.99996	1	18580	0	-3.1013
ATP6V1B2	4	3.8859e-05	0.00014916	0.008212	343	4	-2.5857	0.99996	0.99996	1	18579	0	-2.5857
MRPL4	4	3.9594e-05	0.00015074	0.008275	344	4	-1.8394	0.99996	0.99996	1	18577	0	-1.8394
DUX4	4	3.9833e-05	0.00015284	0.008366	345	4	-3.0886	0.99996	0.99996	1	18576	0	-3.0886
RPS12	4	4.0103e-05	0.00015441	0.008412	346	3	-2.1973	0.97853	0.97866	1	17075	0	-2.1973
EIF3I	4	4.0249e-05	0.00015546	0.008412	347	4	-2.2048	0.99829	0.99829	1	17920	0	-2.2048
MOCS3	4	4.026e-05	0.00015546	0.008412	348	4	-2.9998	0.99996	0.99996	1	18575	0	-2.9998
TAF6	4	4.0421e-05	0.00015546	0.008412	349	4	-2.0423	0.99996	0.99996	1	18574	0	-2.0423
GNAQ	4	4.0636e-05	0.00015598	0.008416	350	4	-1.2123	0.99996	0.99996	1	18573	0	-1.2123
TANGO6	4	4.0961e-05	0.00015703	0.008448	351	4	-2.2669	0.99996	0.99996	1	18572	0	-2.2669
PSMD6	4	4.1096e-05	0.00015755	0.008452	352	4	-1.9659	0.99996	0.99996	1	18571	0	-1.9659
RBFA	4	4.1369e-05	0.00015965	0.008541	353	4	-1.8063	0.99996	0.99996	1	18570	0	-1.8063
TUBB	4	4.1726e-05	0.0001607	0.008572	354	4	-2.6853	0.99996	0.99996	1	18568	0	-2.6853
ARPC4	4	4.2084e-05	0.00016122	0.008576	355	4	-1.6365	0.99996	0.99996	1	18567	0	-1.6365
MRPL53	4	4.2279e-05	0.00016227	0.008608	356	4	-1.8121	0.99996	0.99996	1	18566	0	-1.8121
EEFSEC	4	4.3034e-05	0.00016594	0.008711	357	4	-1.3547	0.99996	0.99996	1	18565	0	-1.3547
SS18L2	4	4.3429e-05	0.00016647	0.008711	358	4	-2.2974	0.99996	0.99996	1	18564	0	-2.2974
BUD31	4	4.36e-05	0.00016699	0.008711	359	4	-2.3195	0.99996	0.99996	1	18563	0	-2.3195
CLNS1A	4	4.3628e-05	0.00016699	0.008711	360	4	-2.2242	0.99996	0.99996	1	18562	0	-2.2242
MRPS2	4	4.3657e-05	0.00016699	0.008711	361	4	-2.0149	0.99996	0.99996	1	18561	0	-2.0149
BTF3	4	4.3742e-05	0.00016699	0.008711	362	4	-1.5478	0.99996	0.99996	1	18560	0	-1.5478
PRELID1	4	4.4181e-05	0.00016909	0.008727	363	4	-2.2565	0.99988	0.99989	1	18421	0	-2.2565
DIS3	4	4.4229e-05	0.00016909	0.008727	364	4	-1.6975	0.99996	0.99996	1	18559	0	-1.6975
SRSF6	4	4.4315e-05	0.00016909	0.008727	365	4	-1.687	0.99996	0.99996	1	18558	0	-1.687
WDR18	4	4.4401e-05	0.00016961	0.008727	366	4	-1.9977	0.99996	0.99996	1	18557	0	-1.9977
WDR43	4	4.4603e-05	0.00016961	0.008727	367	4	-2.0549	0.99996	0.99995	1	18556	0	-2.0549
LSM11	4	4.4835e-05	0.00017119	0.008784	368	4	-1.1059	0.99996	0.99995	1	18555	0	-1.1059
AAMP	4	4.5097e-05	0.00017223	0.008814	369	4	-1.8512	0.99995	0.99995	1	18554	0	-1.8512
SDHA	4	4.5507e-05	0.00017328	0.008823	370	4	-1.7581	0.99995	0.99995	1	18552	0	-1.7581
SRBD1	4	4.5654e-05	0.00017381	0.008823	371	4	-1.4476	0.99995	0.99995	1	18551	0	-1.4476
FCF1	4	4.5772e-05	0.00017381	0.008823	372	4	-2.4949	0.99995	0.99995	1	18550	0	-2.4949
ECD	4	4.6513e-05	0.00017853	0.009038	373	4	-2.372	0.99995	0.99995	1	18549	0	-2.372
DDX27	4	4.6603e-05	0.00017957	0.009067	374	4	-1.7422	0.99995	0.99995	1	18548	0	-1.7422
PDCD2	4	4.6783e-05	0.00018062	0.009096	375	4	-1.7589	0.99995	0.99995	1	18547	0	-1.7589
PET117	4	4.833e-05	0.00018639	0.009361	376	4	-1.6818	0.99995	0.99995	1	18546	0	-1.6818
QRSL1	4	4.8453e-05	0.00018692	0.009363	377	4	-1.5916	0.99995	0.99995	1	18545	0	-1.5916
CCAR1	4	4.9258e-05	0.00019006	0.00947	378	4	-1.0052	0.99995	0.99995	1	18544	0	-1.0052
SNRNP200	4	4.9321e-05	0.00019006	0.00947	379	4	-1.9332	0.99995	0.99995	1	18543	0	-1.9332
PGK1	4	4.9696e-05	0.00019321	0.009601	380	4	-1.42	0.99995	0.99995	1	18542	0	-1.42
DGAT1	4	5.0628e-05	0.00019688	0.009682	381	4	-1.8755	0.99687	0.9969	1	17770	0	-1.8755
HNRNPH1	4	5.0644e-05	0.0001974	0.009682	382	4	-1.7905	0.99995	0.99995	1	18541	0	-1.7905
GGPS1	4	5.0739e-05	0.0001974	0.009682	383	4	-2.3	0.99995	0.99995	1	18540	0	-2.3
ATP1B3	4	5.0799e-05	0.0001974	0.009682	384	4	-2.7897	0.99772	0.99772	1	17856	0	-2.7897
RPL18	4	5.0995e-05	0.0001974	0.009682	385	4	-2.6122	0.99995	0.99995	1	18539	0	-2.6122
RPL35	4	5.1219e-05	0.0001995	0.00976	386	4	-1.7552	0.99995	0.99995	1	18538	0	-1.7552
SPDYE2	4	5.14e-05	0.00020002	0.00976	387	4	-2.4495	0.99985	0.99986	1	18387	0	-2.4495
MRPS25	4	5.1508e-05	0.00020055	0.009761	388	4	-1.928	0.99995	0.99995	1	18537	0	-1.928
COPE	4	5.1863e-05	0.0002016	0.009761	389	4	-3.0789	0.99995	0.99994	1	18536	0	-3.0789
MARS	4	5.1931e-05	0.0002016	0.009761	390	4	-2.8897	0.99994	0.99994	1	18522	0	-2.8897
PRIM2	4	5.1993e-05	0.00020212	0.009762	391	4	-1.5697	0.99995	0.99994	1	18535	0	-1.5697
IGBP1	4	5.258e-05	0.00020527	0.009888	392	4	-2.1605	0.99995	0.99994	1	18534	0	-2.1605
MRPS23	4	5.2791e-05	0.00020579	0.009888	393	3	-2.214	0.59217	0.6581	1	11447	1	-2.214
RPF2	4	5.3303e-05	0.00020841	0.009989	394	4	-1.8528	0.99995	0.99994	1	18533	0	-1.8528
DHX9	4	5.3734e-05	0.00021103	0.010089	395	4	-2.0433	0.99995	0.99994	1	18532	0	-2.0433
LSM2	4	5.4835e-05	0.00021365	0.010188	396	4	-1.9873	0.99984	0.99985	1	18377	0	-1.9873
TBCE	4	5.5009e-05	0.00021418	0.010188	397	4	-1.8814	0.99994	0.99994	1	18531	0	-1.8814
DCTN1	4	5.5315e-05	0.00021523	0.010212	398	4	-1.4798	0.99994	0.99994	1	18530	0	-1.4798
CENPA	4	5.5485e-05	0.00021628	0.010236	399	4	-2.2458	0.99994	0.99994	1	18529	0	-2.2458
NOM1	4	5.5655e-05	0.00021837	0.010309	400	4	-2.293	0.99994	0.99994	1	18528	0	-2.293
ACTR2	4	5.5921e-05	0.00021942	0.010333	401	3	-2.0006	0.96827	0.9683	1	16807	0	-2.0006
PSMC2	4	5.6287e-05	0.00022047	0.010357	402	4	-1.9417	0.99766	0.99766	1	17848	0	-1.9417
CCT7	4	5.6618e-05	0.00022152	0.01038	403	4	-2.8556	0.99994	0.99994	1	18526	0	-2.8556
MTERF4	4	5.6791e-05	0.00022362	0.010452	404	4	-1.9495	0.99994	0.99994	1	18525	0	-1.9495
SLC35B1	4	5.7034e-05	0.00022467	0.010475	405	4	-1.702	0.99994	0.99994	1	18524	0	-1.702
SPATA5	4	5.7838e-05	0.00022938	0.010669	406	4	-2.6808	0.99994	0.99994	1	18523	0	-2.6808
SKP1	4	5.8722e-05	0.00023201	0.010765	407	4	-2.3045	0.99994	0.99994	1	18521	0	-2.3045
EIF3D	4	5.9436e-05	0.00023515	0.010879	408	4	-2.4425	0.99994	0.99994	1	18520	0	-2.4425
MRPS28	4	5.9615e-05	0.00023568	0.010879	409	4	-1.3135	0.99994	0.99994	1	18519	0	-1.3135
METTL3	4	5.9904e-05	0.0002362	0.010879	410	4	-1.5246	0.99994	0.99994	1	18518	0	-1.5246
CYCS	4	6.0506e-05	0.00024039	0.011018	411	4	-2.7475	0.99975	0.99976	1	18314	0	-2.7475
TOMM20	4	6.0602e-05	0.00024039	0.011018	412	4	-2.1245	0.99989	0.9999	1	18444	0	-2.1245
SPATC1	4	6.0993e-05	0.00024302	0.011085	413	4	-0.7752	0.99994	0.99994	1	18517	0	-0.7752
ATP5E	4	6.103e-05	0.00024302	0.011085	414	4	-2.0019	0.99994	0.99994	1	18516	0	-2.0019
COX20	4	6.2024e-05	0.00024773	0.011273	415	4	-1.5763	0.99994	0.99994	1	18515	0	-1.5763
VPS52	4	6.247e-05	0.00025088	0.0113	416	4	-1.8478	0.99994	0.99994	1	18514	0	-1.8478
EIF2S3	4	6.2684e-05	0.0002514	0.0113	417	4	-2.3558	0.99902	0.99902	1	18051	0	-2.3558
COX17	4	6.2993e-05	0.00025193	0.0113	418	4	-2.2745	0.99994	0.99993	1	18513	0	-2.2745
NUDT4	4	6.303e-05	0.00025193	0.0113	419	4	-1.6332	0.99994	0.99993	1	18512	0	-1.6332
SDE2	4	6.3068e-05	0.00025193	0.0113	420	4	-2.0127	0.99994	0.99993	1	18511	0	-2.0127
ARCN1	4	6.3105e-05	0.00025193	0.0113	421	4	-1.8058	0.99994	0.99993	1	18510	0	-1.8058
CLTC	4	6.3632e-05	0.00025403	0.011367	422	4	-2.0796	0.99994	0.99993	1	18509	0	-2.0796
IMPDH2	4	6.3859e-05	0.00025507	0.011387	423	4	-1.8513	0.99994	0.99993	1	18508	0	-1.8513
RPS9	4	6.4128e-05	0.00025665	0.011431	424	4	-2.9397	0.99834	0.99832	1	17933	0	-2.9397
GTPBP4	4	6.4428e-05	0.00025822	0.011474	425	4	-2.6384	0.99659	0.99662	1	17747	0	-2.6384
FAM50A	4	6.4811e-05	0.00025979	0.011516	426	4	-1.9182	0.99994	0.99993	1	18507	0	-1.9182
UQCRQ	4	6.4925e-05	0.00026084	0.011528	427	4	-1.7157	0.99994	0.99993	1	18506	0	-1.7157
SNRPD1	4	6.5268e-05	0.00026189	0.011528	428	4	-2.827	0.99042	0.99041	1	17439	0	-2.827
KTI12	4	6.5464e-05	0.00026189	0.011528	429	4	-2.0585	0.99993	0.99993	1	18505	0	-2.0585
ELAC2	4	6.5738e-05	0.00026346	0.011566	430	3	-1.8643	0.80197	0.80269	1	13829	1	-1.8643
MRPL40	4	6.6394e-05	0.00026399	0.011566	431	4	-1.9232	0.99993	0.99993	1	18504	0	-1.9232
PREB	4	6.7065e-05	0.00026713	0.011677	432	4	-2.0351	0.99314	0.99317	1	17545	0	-2.0351
COQ2	4	6.8405e-05	0.00027421	0.011959	433	4	-1.7241	0.99993	0.99993	1	18503	0	-1.7241
CARS	4	6.9668e-05	0.0002771	0.012052	434	4	-1.9004	0.99913	0.99913	1	18077	0	-1.9004
CPSF3L	4	7.0013e-05	0.00027762	0.012052	435	4	-2.7625	0.99993	0.99993	1	18501	0	-2.7625
MBTPS1	4	7.0746e-05	0.00027919	0.012092	436	4	-1.2209	0.99993	0.99993	1	18500	0	-1.2209
MCM2	4	7.3105e-05	0.00028915	0.012495	437	4	-1.3109	0.99993	0.99992	1	18498	0	-1.3109
IK	4	7.3483e-05	0.00029073	0.012534	438	4	-1.8053	0.99993	0.99992	1	18497	0	-1.8053
WDR24	4	7.5351e-05	0.00029964	0.012853	439	4	-1.6875	0.99992	0.99992	1	18496	0	-1.6875
LZTR1	4	7.5737e-05	0.00030017	0.012853	440	4	-1.4122	0.99992	0.99992	1	18494	0	-1.4122
POT1	4	7.578e-05	0.00030017	0.012853	441	4	-1.4549	0.99992	0.99992	1	18493	0	-1.4549
RFC3	4	7.6645e-05	0.00030331	0.012959	442	4	-1.5555	0.99992	0.99992	1	18492	0	-1.5555
RBM22	4	7.697e-05	0.00030567	0.013012	443	3	-2.6328	0.57939	0.65121	1	11341	1	-2.6328
TPR	4	7.7036e-05	0.00030593	0.013012	444	4	-1.3339	0.99992	0.99992	1	18491	0	-1.3339
QARS	4	7.7517e-05	0.00030803	0.013072	445	4	-2.161	0.99992	0.99992	1	18490	0	-2.161
DCTN5	4	7.8308e-05	0.00031013	0.013102	446	4	-2.94	0.99992	0.99992	1	18489	0	-2.94
PSMD4	4	7.8396e-05	0.00031013	0.013102	447	4	-1.557	0.99992	0.99992	1	18488	0	-1.557
PDE12	4	7.9935e-05	0.00031694	0.01336	448	4	-2.0907	0.99988	0.99989	1	18420	0	-2.0907
BRCA1	4	8.1442e-05	0.00032271	0.013573	449	4	-1.3187	0.99992	0.99992	1	18487	0	-1.3187
TERF1	4	8.176e-05	0.00032428	0.013608	450	4	-1.8343	0.99992	0.99992	1	18486	0	-1.8343
SF3A1	4	8.2951e-05	0.00032638	0.013636	451	4	-2.5705	0.99992	0.99992	1	18485	0	-2.5705
PRPF38A	4	8.2974e-05	0.00032638	0.013636	452	4	-2.6094	0.99921	0.99921	1	18094	0	-2.6094
PSMD14	4	8.4402e-05	0.0003311	0.013802	453	4	-1.8513	0.99311	0.99313	1	17542	0	-1.8513
ZBTB8OS	4	8.5797e-05	0.00033634	0.013981	454	4	-2.9939	0.99991	0.99991	1	18484	0	-2.9939
PAFAH1B1	4	8.6128e-05	0.00033687	0.013981	455	4	-2.1349	0.99991	0.99991	1	18483	0	-2.1349
COPS3	4	8.6793e-05	0.00033844	0.014016	456	4	-1.367	0.99991	0.99991	1	18482	0	-1.367
CDC16	4	8.743e-05	0.00034106	0.014062	457	4	-1.7623	0.99986	0.99986	1	18393	0	-1.7623
TNPO1	4	8.7552e-05	0.00034106	0.014062	458	4	-1.7428	0.99858	0.99854	1	17971	0	-1.7428
POLR2I	4	8.8417e-05	0.00034368	0.014091	459	4	-2.5635	0.98638	0.98635	1	17305	0	-2.5635
SLMO2	4	8.8473e-05	0.00034368	0.014091	460	4	-2.0082	0.99991	0.99991	1	18481	0	-2.0082
RFT1	4	8.8537e-05	0.00034421	0.014091	461	3	-1.9277	0.49837	0.61173	1	10739	1	-1.9277
PSMA4	4	8.857e-05	0.00034473	0.014091	462	4	-1.7285	0.99991	0.99991	1	18480	0	-1.7285
HNRNPC	4	8.9249e-05	0.00034683	0.014146	463	4	-2.0649	0.99991	0.99991	1	18479	0	-2.0649
SPEN	4	8.9347e-05	0.00034788	0.014158	464	4	-0.71982	0.99991	0.99991	1	18478	0	-0.71982
TAF4	4	9.0325e-05	0.00035312	0.01434	465	4	-0.90661	0.99991	0.99991	1	18477	0	-0.90661
PLRG1	4	9.1113e-05	0.00035522	0.014378	466	4	-1.2151	0.99991	0.99991	1	18476	0	-1.2151
DARS	4	9.1162e-05	0.00035574	0.014378	467	4	-2.0011	0.99991	0.99991	1	18475	0	-2.0011
SDAD1	4	9.1311e-05	0.00035679	0.014378	468	4	-2.2901	0.99991	0.99991	1	18474	0	-2.2901
MRPS18A	4	9.1459e-05	0.00035731	0.014378	469	4	-2.0329	0.99991	0.99991	1	18473	0	-2.0329
SNRNP40	4	9.1707e-05	0.00035784	0.014378	470	4	-1.5048	0.99991	0.99991	1	18472	0	-1.5048
TPT1	4	9.2855e-05	0.00036203	0.014505	471	4	-2.3801	0.99991	0.99991	1	18470	0	-2.3801
EEF1A1	4	9.3005e-05	0.00036256	0.014505	472	4	-2.7071	0.99991	0.99991	1	18469	0	-2.7071
YRDC	4	9.4213e-05	0.00036832	0.014674	473	4	-3.3279	0.99922	0.99922	1	18097	0	-3.3279
RTCB	4	9.4216e-05	0.00036832	0.014674	474	4	-1.8412	0.99991	0.99991	1	18468	0	-1.8412
MDM2	4	9.508e-05	0.00037409	0.014862	475	4	-2.1634	0.9999	0.99991	1	18467	0	-2.1634
DYNLRB1	4	9.5131e-05	0.00037462	0.014862	476	4	-2.25	0.9999	0.99991	1	18466	0	-2.25
NAA30	4	9.6002e-05	0.00037934	0.015006	477	4	-1.4634	0.9999	0.9999	1	18465	0	-1.4634
UXT	4	9.6208e-05	0.00038091	0.015006	478	4	-2.0121	0.9999	0.9999	1	18464	0	-2.0121
COX15	4	9.6287e-05	0.00038091	0.015006	479	3	-2.1278	0.96055	0.96057	1	16624	0	-2.1278
ATL2	4	9.6362e-05	0.00038143	0.015006	480	4	-1.4975	0.9999	0.9999	1	18463	0	-1.4975
INTS4	4	9.7467e-05	0.00038563	0.015087	481	3	-1.986	0.98284	0.98285	1	17200	0	-1.986
COASY	4	9.7501e-05	0.00038615	0.015087	482	4	-1.7651	0.9999	0.9999	1	18462	0	-1.7651
WDR77	4	9.7599e-05	0.00038615	0.015087	483	3	-2.3956	0.96748	0.96749	1	16788	0	-2.3956
COX7C	4	9.8075e-05	0.00038668	0.015087	484	4	-1.5741	0.9999	0.9999	1	18461	0	-1.5741
SLC7A6OS	4	9.9123e-05	0.0003893	0.015116	485	4	-0.99993	0.9999	0.9999	1	18459	0	-0.99993
RPS23	4	9.9322e-05	0.00038982	0.015116	486	4	-2.1645	0.99973	0.99973	1	18297	0	-2.1645
HIRA	4	9.9439e-05	0.00038982	0.015116	487	4	-0.91456	0.9999	0.9999	1	18458	0	-0.91456
MRPS26	4	9.9598e-05	0.00039087	0.015125	488	4	-1.5074	0.9999	0.9999	1	18457	0	-1.5074
PPP2R1A	4	9.9915e-05	0.00039192	0.015135	489	4	-1.6455	0.9999	0.9999	1	18456	0	-1.6455
TAF1B	4	0.00010029	0.00039297	0.015144	490	4	-1.5635	0.9999	0.9999	1	18455	0	-1.5635
ZNHIT2	4	0.00010071	0.00039402	0.015154	491	4	-2.4614	0.9999	0.9999	1	18454	0	-2.4614
PELP1	4	0.00010098	0.00039664	0.015213	492	4	-2.6632	0.9999	0.9999	1	18453	0	-2.6632
PCYT1A	4	0.00010106	0.00039716	0.015213	493	3	-2.1646	0.18119	0.31905	0.968615	6218	1	-2.1646
EEF2	4	0.00010174	0.00039873	0.015219	494	4	-2.5025	0.99856	0.99853	1	17966	0	-2.5025
TRIM49C	4	0.00010216	0.00040083	0.015219	495	4	-1.1802	0.9999	0.9999	1	18452	0	-1.1802
MRPL15	4	0.00010232	0.00040083	0.015219	496	4	-1.5504	0.9999	0.9999	1	18451	0	-1.5504
MPV17L2	4	0.00010264	0.00040136	0.015219	497	4	-1.7024	0.9999	0.9999	1	18450	0	-1.7024
ZCRB1	4	0.00010275	0.00040136	0.015219	498	4	-1.9552	0.9999	0.9999	1	18449	0	-1.9552
MYB	4	0.0001046	0.00040503	0.015328	499	4	-1.8214	0.9999	0.9999	1	18448	0	-1.8214
U2AF1	4	0.0001049	0.00040607	0.015337	500	4	-2.2905	0.99311	0.99313	1	17543	0	-2.2905
POLR2F	4	0.00010609	0.00041184	0.015523	501	4	-1.741	0.99989	0.9999	1	18447	0	-1.741
PPP1R15B	4	0.00010799	0.00041866	0.015706	502	4	-2.1211	0.99989	0.9999	1	18446	0	-2.1211
ASNA1	4	0.00010816	0.00041918	0.015706	503	4	-1.1537	0.99989	0.9999	1	18445	0	-1.1537
XRCC6	4	0.00010824	0.00041918	0.015706	504	3	-1.8059	0.92438	0.9245	1	15917	0	-1.8059
CENPK	4	0.00010894	0.00042128	0.01573	505	4	-2.5918	0.99989	0.9999	1	18443	0	-2.5918
ABCF1	4	0.00010917	0.0004218	0.01573	506	4	-1.6406	0.99989	0.9999	1	18442	0	-1.6406
RPL3	4	0.0001094	0.00042233	0.01573	507	4	-1.8415	0.99989	0.9999	1	18441	0	-1.8415
RRN3	4	0.00010974	0.00042495	0.015755	508	4	-1.9749	0.99989	0.99989	1	18440	0	-1.9749
CDC37	4	0.00010985	0.00042547	0.015755	509	4	-2.056	0.99989	0.99989	1	18439	0	-2.056
NOP14	4	0.00011008	0.00042652	0.015755	510	4	-2.2348	0.99896	0.99895	1	18037	0	-2.2348
CCT3	4	0.00011014	0.00042705	0.015755	511	4	-2.0428	0.99989	0.99989	1	18438	0	-2.0428
RARS2	4	0.00011031	0.0004281	0.015755	512	4	-1.8056	0.99989	0.99989	1	18437	0	-1.8056
C21orf59	4	0.00011059	0.00042862	0.015755	513	4	-2.1037	0.99989	0.99989	1	18436	0	-2.1037
TUBGCP3	4	0.00011082	0.00042914	0.015755	514	4	-1.6046	0.99989	0.99989	1	18435	0	-1.6046
SOD2	4	0.00011094	0.00042967	0.015755	515	4	-1.5276	0.99989	0.99989	1	18434	0	-1.5276
HSCB	4	0.00011174	0.00043229	0.01579	516	4	-1.9682	0.99989	0.99989	1	18433	0	-1.9682
CS	4	0.00011191	0.00043229	0.01579	517	4	-1.5295	0.99989	0.99989	1	18432	0	-1.5295
RPL24	4	0.00011226	0.00043439	0.015832	518	4	-1.7955	0.99989	0.99989	1	18431	0	-1.7955
SRP54	4	0.00011272	0.00043596	0.015832	519	4	-2.1768	0.99989	0.99989	1	18430	0	-2.1768
RAD9A	4	0.00011278	0.00043596	0.015832	520	4	-2.7412	0.99989	0.99989	1	18429	0	-2.7412
SLC19A1	4	0.00011295	0.00043753	0.015859	521	4	-1.8359	0.99989	0.99989	1	18428	0	-1.8359
INTS8	4	0.00011359	0.00043963	0.015893	522	4	-1.5934	0.99989	0.99989	1	18427	0	-1.5934
DDOST	4	0.00011365	0.00044015	0.015893	523	4	-1.204	0.99989	0.99989	1	18426	0	-1.204
TADA1	4	0.00011418	0.00044225	0.015938	524	4	-1.3326	0.99989	0.99989	1	18425	0	-1.3326
SMARCA5	4	0.00011488	0.00044435	0.015971	525	4	-0.96958	0.99989	0.99989	1	18424	0	-0.96958
HAUS7	4	0.00011515	0.00044487	0.015971	526	3	-1.6812	0.80101	0.80185	1	13814	1	-1.6812
NUP160	4	0.00011545	0.00044592	0.015979	527	3	-2.0043	0.60243	0.6637	1	11538	1	-2.0043
RPA1	4	0.00011594	0.00044802	0.016023	528	4	-1.3649	0.99988	0.99989	1	18423	0	-1.3649
CHCHD1	4	0.00011648	0.00044959	0.016049	529	4	-1.5872	0.99981	0.9998	1	18349	0	-1.5872
PDRG1	4	0.00011684	0.00045221	0.016112	530	4	-1.6391	0.99988	0.99989	1	18422	0	-1.6391
SMC2	4	0.00011842	0.00045903	0.016325	531	4	-2.6111	0.99987	0.99987	1	18407	0	-2.6111
PHF5A	4	0.00011902	0.00046375	0.016461	532	4	-2.3368	0.99973	0.99973	1	18302	0	-2.3368
TXN	4	0.00011936	0.00046532	0.016486	533	4	-1.4792	0.99988	0.99989	1	18419	0	-1.4792
RPE	4	0.00012094	0.00047056	0.016641	534	4	-1.7251	0.99988	0.99989	1	18418	0	-1.7251
LRR1	4	0.00012131	0.00047161	0.016647	535	4	-1.3647	0.99988	0.99989	1	18417	0	-1.3647
RPS21	4	0.00012155	0.00047319	0.016671	536	4	-1.7118	0.99988	0.99989	1	18416	0	-1.7118
RELA	4	0.00012315	0.00047843	0.016824	537	4	-1.5503	0.99988	0.99988	1	18415	0	-1.5503
DPAGT1	4	0.00012346	0.00047948	0.01683	538	4	-1.8848	0.99988	0.99988	1	18414	0	-1.8848
DGCR8	4	0.00012435	0.00048315	0.01687	539	4	-1.8743	0.99876	0.99874	1	18004	0	-1.8743
LRPPRC	4	0.00012458	0.00048367	0.01687	540	4	-1.4982	0.99988	0.99988	1	18413	0	-1.4982
SF3B5	4	0.00012471	0.00048367	0.01687	541	4	-2.1004	0.99988	0.99988	1	18412	0	-2.1004
PSMC6	4	0.0001249	0.0004842	0.01687	542	4	-1.8894	0.99988	0.99988	1	18411	0	-1.8894
N6AMT1	4	0.00012793	0.00049783	0.017313	543	4	-2.1258	0.99987	0.99988	1	18410	0	-2.1258
MRPS12	4	0.0001285	0.0005015	0.017409	544	4	-1.6867	0.99987	0.99988	1	18409	0	-1.6867
GINS1	4	0.00012972	0.00050569	0.017522	545	4	-1.4042	0.99987	0.99988	1	18408	0	-1.4042
TUBA1B	4	0.00013064	0.00051041	0.017653	546	4	-1.8558	0.99986	0.99986	1	18396	0	-1.8558
PNPT1	4	0.00013144	0.00051356	0.017729	547	4	-1.9167	0.99833	0.99831	1	17928	0	-1.9167
PRPF38B	4	0.00013248	0.0005167	0.017806	548	4	-1.3381	0.99742	0.99741	1	17820	0	-1.3381
SMN1	4	0.00013338	0.00052195	0.017946	549	3	-1.8997	0.93089	0.931	1	16039	0	-1.8997
POLE	4	0.00013357	0.00052404	0.017946	550	4	-1.9852	0.99987	0.99987	1	18406	0	-1.9852
GBF1	4	0.00013363	0.00052457	0.017946	551	4	-1.2326	0.99987	0.99987	1	18405	0	-1.2326
NUP155	4	0.0001337	0.00052457	0.017946	552	3	-2.3006	0.96677	0.96681	1	16772	0	-2.3006
EXOC3	4	0.00013403	0.00052771	0.018006	553	4	-1.5946	0.99984	0.99984	1	18371	0	-1.5946
MRPL57	4	0.00013409	0.00052824	0.018006	554	4	-2.4583	0.99987	0.99987	1	18404	0	-2.4583
NLE1	4	0.00013435	0.00052981	0.018027	555	4	-2.6696	0.99934	0.99936	1	18131	0	-2.6696
NCBP1	4	0.00013533	0.00053191	0.018066	556	3	-1.9501	0.97648	0.97662	1	17017	0	-1.9501
AKIRIN2	4	0.00013622	0.00053558	0.018158	557	4	-1.9587	0.99986	0.99987	1	18403	0	-1.9587
CCDC101	4	0.00013736	0.0005403	0.018252	558	4	-1.4721	0.99986	0.99987	1	18402	0	-1.4721
TRAPPC11	4	0.00013749	0.0005403	0.018252	559	4	-1.6594	0.99986	0.99987	1	18401	0	-1.6594
NDUFB10	4	0.0001377	0.00054135	0.018255	560	4	-1.8934	0.99986	0.99987	1	18400	0	-1.8934
LIN9	4	0.00013878	0.00054502	0.018334	561	4	-1.7261	0.99986	0.99986	1	18399	0	-1.7261
NOP10	4	0.00013946	0.00054659	0.018334	562	4	-2.1787	0.99936	0.99937	1	18140	0	-2.1787
POLR1C	4	0.00013959	0.00054659	0.018334	563	4	-2.0002	0.99986	0.99986	1	18398	0	-2.0002
RSL1D1	4	0.00014	0.00054869	0.018371	564	4	-1.252	0.99986	0.99986	1	18397	0	-1.252
RPL5	4	0.00014248	0.00056075	0.018742	565	4	-2.256	0.98945	0.98943	1	17407	0	-2.256
RAD21	4	0.00014367	0.00056651	0.018873	566	3	-1.7762	0.47931	0.6031	1	10597	1	-1.7762
AARS	4	0.00014372	0.00056756	0.018873	567	4	-1.5454	0.99986	0.99986	1	18395	0	-1.5454
DHFR	4	0.00014418	0.00056913	0.018873	568	4	-2.663	0.99961	0.99961	1	18239	0	-2.663
NOP2	4	0.00014428	0.00056913	0.018873	569	4	-1.8496	0.99986	0.99986	1	18392	0	-1.8496
H2AFZ	4	0.00014452	0.00056966	0.018873	570	4	-1.943	0.9893	0.98929	1	17400	0	-1.943
INTS1	4	0.00014498	0.00057071	0.018874	571	4	-2.1959	0.99986	0.99986	1	18391	0	-2.1959
SPDYE2B	4	0.00014582	0.0005749	0.01898	572	4	-2.5518	0.99985	0.99986	1	18390	0	-2.5518
TP53TG3C	4	0.00014631	0.00057647	0.018985	573	4	-1.1116	0.99985	0.99986	1	18389	0	-1.1116
MIOS	4	0.0001473	0.0005791	0.018985	574	4	-1.3468	0.99985	0.99986	1	18388	0	-1.3468
CSE1L	4	0.00014745	0.0005791	0.018985	575	3	-2.446	0.02189	0.06386	0.712307	1693	1	-2.446
DNLZ	4	0.00014751	0.0005791	0.018985	576	4	-2.5739	0.99983	0.99984	1	18370	0	-2.5739
EIF4A3	4	0.00014849	0.00058172	0.019023	577	4	-3.2221	0.99927	0.99928	1	18108	0	-3.2221
TTI1	4	0.00014894	0.00058224	0.019023	578	4	-1.5426	0.99985	0.99986	1	18386	0	-1.5426
TCP1	4	0.00015001	0.00058801	0.019178	579	4	-1.2618	0.99985	0.99986	1	18385	0	-1.2618
DCTN2	4	0.00015037	0.00058958	0.019196	580	4	-1.0647	0.99985	0.99986	1	18384	0	-1.0647
YME1L1	4	0.00015146	0.00059325	0.019282	581	4	-1.4206	0.99904	0.99904	1	18052	0	-1.4206
NUP43	4	0.00015261	0.00059587	0.019334	582	4	-2.2865	0.99985	0.99985	1	18383	0	-2.2865
MAU2	4	0.00015412	0.00060164	0.019488	583	3	-1.7953	0.94934	0.94937	1	16418	0	-1.7953
SHQ1	4	0.00015555	0.00060531	0.019573	584	4	-1.1117	0.99984	0.99985	1	18382	0	-1.1117
FBXL6	4	0.00015577	0.00060636	0.019573	585	4	-1.4566	0.99984	0.99985	1	18381	0	-1.4566
ATP6V0C	4	0.00015624	0.00060793	0.019591	586	4	-1.7693	0.9996	0.99959	1	18232	0	-1.7693
VPRBP	4	0.00015725	0.00061055	0.019642	587	4	-1.8974	0.99984	0.99985	1	18380	0	-1.8974
VARS2	4	0.00015747	0.00061213	0.019659	588	4	-2.7086	0.99984	0.99985	1	18379	0	-2.7086
NDUFA6	4	0.0001577	0.00061318	0.019659	589	4	-1.2477	0.99984	0.99985	1	18378	0	-1.2477
C3orf17	4	0.00015917	0.00061842	0.019743	590	4	-1.7476	0.99001	0.98998	1	17423	0	-1.7476
SDHD	4	0.00015942	0.00061894	0.019743	591	4	-2.1657	0.99984	0.99985	1	18375	0	-2.1657
GTF3C4	4	0.00015964	0.00061894	0.019743	592	4	-1.2743	0.99984	0.99985	1	18374	0	-1.2743
CCNA2	4	0.00016176	0.00062523	0.01991	593	4	-1.8642	0.99984	0.99984	1	18373	0	-1.8642
LRRC37A3	4	0.00016199	0.00062628	0.01991	594	4	-2.257	0.99984	0.99984	1	18372	0	-2.257
NARS	4	0.00016358	0.0006331	0.020093	595	3	-2.664	0.95265	0.95272	1	16482	0	-2.664
RPS2	4	0.00016656	0.00064149	0.020324	596	3	-2.8428	0.7941	0.7956	1	13704	1	-2.8428
IDH3A	4	0.00016773	0.00064254	0.020324	597	4	-2.2148	0.99976	0.99976	1	18318	0	-2.2148
NAA50	4	0.0001684	0.00064359	0.020324	598	4	-1.7214	0.99983	0.99984	1	18369	0	-1.7214
EXOSC2	4	0.00016918	0.00064568	0.020356	599	4	-1.9967	0.99983	0.99984	1	18368	0	-1.9967
LARS	4	0.00017155	0.00065617	0.020652	600	4	-2.1905	0.99983	0.99983	1	18367	0	-2.1905
CLP1	4	0.00017347	0.00066351	0.02083	601	4	-1.8051	0.99983	0.99983	1	18366	0	-1.8051
GCN1L1	4	0.00017411	0.00066403	0.02083	602	4	-1.0471	0.99983	0.99983	1	18365	0	-1.0471
SRSF2	4	0.00017534	0.00067085	0.021009	603	3	-2.9412	0.86938	0.86929	1	14935	0	-2.9412
NOC4L	4	0.0001758	0.00067347	0.021056	604	4	-1.6978	0.99982	0.99983	1	18364	0	-1.6978
PUF60	4	0.00017661	0.00067557	0.021087	605	4	-1.7542	0.99982	0.99983	1	18363	0	-1.7542
NCAPD3	4	0.00017784	0.00067819	0.021097	606	4	-0.83726	0.99982	0.99983	1	18362	0	-0.83726
VPS28	4	0.00017816	0.00067819	0.021097	607	4	-1.8906	0.99982	0.99983	1	18361	0	-1.8906
WDR12	4	0.00017849	0.00067924	0.021097	608	4	-1.8437	0.99982	0.99983	1	18360	0	-1.8437
AGAP4	4	0.00017964	0.00068291	0.021176	609	4	-2.1775	0.99982	0.99982	1	18359	0	-2.1775
MYBBP1A	4	0.00018063	0.00068448	0.02119	610	4	-1.5564	0.98731	0.98728	1	17336	0	-1.5564
MVD	4	0.00018135	0.00068763	0.021252	611	3	-2.2827	0.94324	0.94331	1	16280	0	-2.2827
SMARCB1	4	0.0001837	0.00069444	0.021417	612	4	-1.6238	0.99982	0.99982	1	18358	0	-1.6238
MCM6	4	0.00018502	0.00069706	0.021417	613	3	-2.3643	0.6522	0.6924	1	12003	1	-2.3643
ZPR1	4	0.00018529	0.00069811	0.021417	614	4	-1.9956	0.99981	0.99982	1	18357	0	-1.9956
UQCRH	4	0.00018546	0.00069864	0.021417	615	1	0.21238	0.073269	0.16571	0.872431	3581	2	0.21238
HNRNPA1	4	0.00018562	0.00069864	0.021417	616	4	-1.7112	0.99304	0.99306	1	17541	0	-1.7112
SNAPC2	4	0.00018681	0.00070178	0.021479	617	4	-1.3792	0.99981	0.99982	1	18356	0	-1.3792
CYC1	4	0.00018744	0.00070388	0.021489	618	4	-2.2652	0.9972	0.9972	1	17793	0	-2.2652
ECT2	4	0.00018766	0.0007044	0.021489	619	4	-1.6069	0.99981	0.99981	1	18355	0	-1.6069
TAF2	4	0.00019048	0.00071437	0.021758	620	4	-1.5939	0.99981	0.99981	1	18354	0	-1.5939
CCS	4	0.00019091	0.00071646	0.021781	621	4	-0.77597	0.99981	0.99981	1	18353	0	-0.77597
ZRSR2	4	0.00019152	0.00071856	0.021781	622	4	-1.2217	0.99981	0.99981	1	18352	0	-1.2217
CWC15	4	0.00019153	0.00071856	0.021781	623	3	-1.7026	0.71925	0.73607	1	12681	1	-1.7026
UBA1	4	0.00019215	0.00072066	0.021809	624	4	-2.355	0.99333	0.99336	1	17553	0	-2.355
KANSL3	4	0.0001942	0.00072695	0.021961	625	4	-1.5518	0.99981	0.9998	1	18351	0	-1.5518
SSB	4	0.00019447	0.000728	0.021961	626	4	-0.97545	0.99981	0.9998	1	18350	0	-0.97545
SRSF7	4	0.00019481	0.00073193	0.022044	627	4	-1.7322	0.99981	0.9998	1	18348	0	-1.7322
SMC4	4	0.00019526	0.00073481	0.022096	628	3	-1.9985	0.98038	0.98044	1	17119	0	-1.9985
NDUFB2	4	0.00019648	0.00073901	0.022187	629	4	-1.5601	0.9998	0.9998	1	18347	0	-1.5601
ZNRD1	4	0.00019727	0.00074215	0.022246	630	4	-1.6422	0.9998	0.9998	1	18346	0	-1.6422
CDC73	4	0.00019895	0.0007453	0.022285	631	4	-0.77932	0.9998	0.9998	1	18345	0	-0.77932
RTEL1	4	0.00019904	0.00074582	0.022285	632	4	-2.0641	0.9998	0.9998	1	18344	0	-2.0641
RPS26	4	0.00019988	0.00074897	0.022344	633	3	-2.3486	0.97315	0.97326	1	16924	0	-2.3486
CKS1B	4	0.00020029	0.00075107	0.022371	634	4	-1.2603	0.9998	0.9998	1	18343	0	-1.2603
C17orf89	4	0.00020047	0.00075264	0.022378	635	4	-1.6063	0.9998	0.9998	1	18342	0	-1.6063
SYS1	4	0.00020083	0.00075369	0.022378	636	4	-3.1459	0.9998	0.9998	1	18341	0	-3.1459
MMS19	4	0.00020127	0.00075579	0.022386	637	4	-1.4012	0.9998	0.9998	1	18340	0	-1.4012
DDX20	4	0.00020136	0.00075631	0.022386	638	3	-2.2414	0.73411	0.74669	1	12860	1	-2.2414
CHAF1A	4	0.00020163	0.00075788	0.022397	639	4	-2.3385	0.9998	0.9998	1	18339	0	-2.3385
POLR2A	4	0.00020181	0.00075998	0.022424	640	4	-2.0093	0.9998	0.9998	1	18338	0	-2.0093
FARS2	4	0.00020271	0.00076418	0.022513	641	4	-1.937	0.9998	0.9998	1	18337	0	-1.937
NELFB	4	0.00020551	0.00077414	0.022771	642	4	-1.2761	0.99979	0.99979	1	18336	0	-1.2761
ATP6V0D1	4	0.00020629	0.00077833	0.022859	643	4	-2.2999	0.9954	0.99539	1	17663	0	-2.2999
NUP107	4	0.00020789	0.000782	0.022931	644	4	-1.8149	0.99979	0.99979	1	18335	0	-1.8149
BAGE2	4	0.00020911	0.00078777	0.023054	645	3	-2.1635	0.12961	0.26525	0.928107	5397	1	-2.1635
LYPD2	4	0.00020999	0.00078987	0.023054	646	4	-1.4302	0.99978	0.99979	1	18332	0	-1.4302
MRPL10	4	0.0002101	0.00078987	0.023054	647	4	-1.7064	0.99979	0.99979	1	18334	0	-1.7064
SMARCD1	4	0.00021233	0.00079878	0.023278	648	4	-1.407	0.99979	0.99979	1	18333	0	-1.407
TOP3A	4	0.00021684	0.00081451	0.023663	649	4	-1.3006	0.99956	0.99956	1	18214	0	-1.3006
THOC5	4	0.00021684	0.00081451	0.023663	650	4	-1.2365	0.99978	0.99978	1	18331	0	-1.2365
UBE2Q2L	4	0.0002175	0.00081661	0.023688	651	4	-1.7438	0.99978	0.99978	1	18330	0	-1.7438
IKBKAP	4	0.00021836	0.0008208	0.023773	652	4	-0.97211	0.99978	0.99978	1	18329	0	-0.97211
TAZ	4	0.00022046	0.00082814	0.023943	653	4	-1.0892	0.99978	0.99978	1	18328	0	-1.0892
TRIM43	4	0.00022088	0.00082919	0.023943	654	4	-1.5771	0.9994	0.99942	1	18155	0	-1.5771
PSMC4	4	0.00022123	0.00083234	0.023997	655	4	-1.8578	0.99978	0.99978	1	18327	0	-1.8578
ALG13	4	0.0002236	0.0008381	0.024126	656	3	-2.4885	0.80422	0.8048	1	13866	1	-2.4885
VPS33A	4	0.00022481	0.0008423	0.02421	657	4	-1.094	0.99978	0.99978	1	18326	0	-1.094
RAD1	4	0.0002302	0.00086327	0.024775	658	4	-1.2412	0.99977	0.99977	1	18325	0	-1.2412
TBCC	4	0.0002312	0.00086694	0.024805	659	4	-2.088	0.99977	0.99977	1	18324	0	-2.088
COA6	4	0.00023149	0.00086746	0.024805	660	4	-1.9851	0.99977	0.99977	1	18323	0	-1.9851
AFG3L2	4	0.00023229	0.00086904	0.024805	661	4	-1.9866	0.99977	0.99977	1	18322	0	-1.9866
PRMT5	4	0.00023239	0.00086956	0.024805	662	4	-1.2112	0.99977	0.99977	1	18321	0	-1.2112
HK2	4	0.00023316	0.00087113	0.024812	663	4	-2.4859	0.99947	0.99947	1	18181	0	-2.4859
TELO2	4	0.00023637	0.00087952	0.025006	664	4	-1.6871	0.99941	0.99942	1	18158	0	-1.6871
PARS2	4	0.00023681	0.00088057	0.025006	665	4	-1.0654	0.99976	0.99977	1	18320	0	-1.0654
CHMP6	4	0.00023742	0.00088267	0.025028	666	4	-1.6639	0.99976	0.99977	1	18319	0	-1.6639
GTF2E2	4	0.00024335	0.00090469	0.025613	667	4	-1.2159	0.99976	0.99976	1	18317	0	-1.2159
ABT1	4	0.00024408	0.00090626	0.02562	668	4	-1.3647	0.99976	0.99976	1	18316	0	-1.3647
RCL1	4	0.00024522	0.00090993	0.025661	669	4	-1.404	0.99975	0.99976	1	18315	0	-1.404
THOC2	4	0.00024546	0.00091046	0.025661	670	4	-1.2199	0.99971	0.99971	1	18293	0	-1.2199
TSPY4	4	0.00024678	0.00091439	0.025734	671	4	-0.92358	0.99975	0.99976	1	18313	0	-0.92358
PHB2	4	0.00024761	0.00091675	0.025762	672	4	-2.484	0.99975	0.99975	1	18312	0	-2.484
LSM7	4	0.00024908	0.00092147	0.025856	673	4	-1.4516	0.99975	0.99975	1	18311	0	-1.4516
FAM157A	4	0.00024992	0.00092619	0.02595	674	4	-1.576	0.99975	0.99975	1	18310	0	-1.576
PPAN	4	0.00025231	0.00093851	0.026256	675	4	-2.4622	0.99933	0.99934	1	18125	0	-2.4622
DNAJA3	4	0.00025278	0.00094087	0.026283	676	4	-1.0857	0.99975	0.99975	1	18309	0	-1.0857
DNAJC9	4	0.00025374	0.00094401	0.026332	677	4	-2.5528	0.99975	0.99975	1	18308	0	-2.5528
HSD17B10	4	0.00025425	0.00094559	0.026337	678	4	-2.3357	0.99936	0.99938	1	18142	0	-2.3357
PSMD7	4	0.00025491	0.00094978	0.026415	679	4	-2.6578	0.99975	0.99975	1	18307	0	-2.6578
TNPO3	4	0.00025954	0.00096394	0.026769	680	4	-1.314	0.99974	0.99974	1	18305	0	-1.314
ZNF407	4	0.0002603	0.00096656	0.026802	681	4	-1.2978	0.99974	0.99974	1	18304	0	-1.2978
TERF2	4	0.00026307	0.00097442	0.026981	682	4	-1.8652	0.99769	0.99769	1	17853	0	-1.8652
PSMD3	4	0.00026383	0.00097862	0.027057	683	4	-2.2844	0.99655	0.99659	1	17743	0	-2.2844
FAM96B	4	0.00026434	0.00098019	0.027061	684	4	-2.9451	0.99942	0.99943	1	18161	0	-2.9451
ETF1	4	0.00026621	0.00098491	0.027152	685	4	-2.189	0.99973	0.99973	1	18303	0	-2.189
YKT6	4	0.00026754	0.00098963	0.027242	686	4	-1.6448	0.99973	0.99973	1	18301	0	-1.6448
SAP18	4	0.00026843	0.00099172	0.027249	687	4	-3.1534	0.99662	0.99666	1	17750	0	-3.1534
PTPN23	4	0.00026876	0.00099277	0.027249	688	4	-1.3699	0.99973	0.99973	1	18300	0	-1.3699
NBPF4	4	0.00027111	0.00099906	0.027343	689	4	-0.79922	0.99973	0.99973	1	18298	0	-0.79922
RACGAP1	4	0.00027257	0.0010069	0.027518	690	3	-1.7931	0.60892	0.66729	1	11596	1	-1.7931
CPSF3	4	0.00027369	0.0010122	0.027621	691	4	-1.7626	0.99973	0.99973	1	18296	0	-1.7626
RNGTT	4	0.00027516	0.0010158	0.027641	692	4	-1.5603	0.99972	0.99972	1	18295	0	-1.5603
EIF2B2	4	0.00027517	0.0010158	0.027641	693	3	-1.9086	0.97654	0.97668	1	17019	0	-1.9086
WDR73	4	0.00027686	0.0010206	0.02773	694	4	-1.545	0.99972	0.99972	1	18294	0	-1.545
COX11	4	0.00028853	0.001062	0.028774	695	4	-1.8831	0.99971	0.99971	1	18292	0	-1.8831
RBBP4	4	0.00028888	0.001063	0.028774	696	4	-2.0559	0.99971	0.99971	1	18291	0	-2.0559
POLA2	4	0.000289	0.0010636	0.028774	697	4	-1.1136	0.99971	0.99971	1	18290	0	-1.1136
TP53RK	4	0.00029112	0.0010709	0.028904	698	4	-2.6176	0.99971	0.99971	1	18289	0	-2.6176
WDR36	4	0.00029143	0.0010714	0.028904	699	4	-1.2637	0.99967	0.99967	1	18272	0	-1.2637
TAF7	4	0.00029196	0.0010751	0.028961	700	3	-1.4854	0.96017	0.96019	1	16615	0	-1.4854
USP36	4	0.00029242	0.0010782	0.029005	701	4	-1.0075	0.99971	0.99971	1	18288	0	-1.0075
OR4F17	4	0.00029551	0.0010877	0.029204	702	4	-1.7016	0.9997	0.9997	1	18287	0	-1.7016
SRP14	4	0.00029578	0.0010887	0.029204	703	4	-1.5374	0.99741	0.99741	1	17819	0	-1.5374
SPC24	4	0.00029659	0.0010908	0.029218	704	4	-1.3851	0.9997	0.9997	1	18286	0	-1.3851
ZNF217	4	0.00029996	0.0010997	0.029402	705	4	-1.7816	0.9997	0.9997	1	18285	0	-1.7816
RPL30	4	0.00030026	0.0011008	0.029402	706	4	-2.2979	0.99428	0.99432	1	17610	0	-2.2979
ALG1	4	0.00030068	0.0011039	0.029431	707	4	-1.2053	0.9997	0.9997	1	18284	0	-1.2053
ASH2L	4	0.00030092	0.001105	0.029431	708	4	-1.6263	0.9997	0.9997	1	18283	0	-1.6263
ALG2	4	0.00030492	0.0011207	0.029808	709	4	-2.8537	0.99386	0.9939	1	17588	0	-2.8537
KIAA0391	4	0.00030592	0.0011238	0.029849	710	4	-1.3444	0.99969	0.99969	1	18282	0	-1.3444
STX18	4	0.00030828	0.0011354	0.030069	711	3	-0.9967	0.98003	0.98009	1	17107	0	-0.9967
EIF3E	4	0.000309	0.001137	0.030069	712	4	-0.93354	0.99969	0.99969	1	18281	0	-0.93354
TMEM258	4	0.00030912	0.0011375	0.030069	713	4	-1.9538	0.99969	0.99969	1	18280	0	-1.9538
PRAMEF15	4	0.00030941	0.0011385	0.030069	714	4	-1.7645	0.99952	0.99952	1	18202	0	-1.7645
GTF2B	4	0.00030974	0.0011401	0.030069	715	4	-1.8475	0.99969	0.99969	1	18279	0	-1.8475
GTPBP6	4	0.00031135	0.0011464	0.030193	716	4	-1.5859	0.99969	0.99969	1	18278	0	-1.5859
RPAIN	4	0.00031222	0.001149	0.03022	717	4	-1.3239	0.99969	0.99969	1	18277	0	-1.3239
MPHOSPH10	4	0.00031434	0.0011564	0.030371	718	4	-1.1602	0.99969	0.99968	1	18276	0	-1.1602
DDX18	4	0.00031497	0.0011585	0.030384	719	4	-1.5232	0.99969	0.99968	1	18275	0	-1.5232
TOMM22	4	0.00031912	0.0011737	0.030738	720	4	-1.4286	0.99968	0.99968	1	18274	0	-1.4286
ANAPC2	4	0.00031968	0.0011752	0.030738	721	3	-1.7483	0.44288	0.58715	1	10360	1	-1.7483
UTP20	4	0.00032447	0.0011904	0.031093	722	4	-1.7343	0.99968	0.99967	1	18273	0	-1.7343
NAT10	4	0.00032549	0.0011957	0.031187	723	3	-1.7197	0.20715	0.34602	0.983026	6643	1	-1.7197
GTF3C3	4	0.0003273	0.001202	0.031233	724	4	-1.0093	0.99967	0.99966	1	18271	0	-1.0093
SPDYE1	4	0.00032753	0.001203	0.031233	725	4	-1.2909	0.99283	0.99285	1	17534	0	-1.2909
NDUFA2	4	0.00032758	0.0012035	0.031233	726	4	-2.5851	0.99967	0.99966	1	18268	0	-2.5851
PSMB7	4	0.00032783	0.0012041	0.031233	727	4	-2.3696	0.99315	0.99318	1	17546	0	-2.3696
SAE1	4	0.00033047	0.0012135	0.031435	728	4	-1.9686	0.99935	0.99936	1	18134	0	-1.9686
RAD51	4	0.00033131	0.0012177	0.031482	729	4	-1.7188	0.99967	0.99966	1	18270	0	-1.7188
KIF18A	4	0.00033196	0.0012187	0.031482	730	4	-1.2992	0.99967	0.99966	1	18269	0	-1.2992
CEBPZ	4	0.00033284	0.0012203	0.031482	731	3	-2.0999	0.97781	0.97797	1	17056	0	-2.0999
H3F3A	3	0.0003342	0.00099697	0.027325	732	3	-2.1144	0.98555	0.98568	1	17276	0	-2.1144
C19orf52	4	0.00033458	0.0012266	0.031571	733	4	-2.2155	0.99967	0.99966	1	18267	0	-2.2155
DDX56	4	0.00033484	0.0012271	0.031571	734	4	-1.1938	0.99967	0.99966	1	18266	0	-1.1938
DHX15	4	0.00033563	0.0012308	0.031623	735	4	-1.1977	0.99966	0.99966	1	18265	0	-1.1977
ZNF830	4	0.00033813	0.0012371	0.031711	736	4	-1.8098	0.99966	0.99966	1	18264	0	-1.8098
RNF40	4	0.00033826	0.0012376	0.031711	737	4	-1.225	0.99966	0.99966	1	18263	0	-1.225
BRIX1	4	0.0003406	0.0012471	0.031888	738	3	-1.7793	0.9624	0.96241	1	16671	0	-1.7793
UTP6	4	0.00034105	0.0012481	0.031888	739	4	-2.2814	0.99966	0.99965	1	18262	0	-2.2814
UBA52	4	0.00034168	0.0012513	0.031888	740	3	-2.536	0.96952	0.96954	1	16845	0	-2.536
TBL3	4	0.00034171	0.0012513	0.031888	741	4	-1.7814	0.99966	0.99965	1	18261	0	-1.7814
SUPT4H1	4	0.00034412	0.0012591	0.032012	742	4	-2.7773	0.99966	0.99965	1	18260	0	-2.7773
HIST1H2BN	4	0.00034441	0.0012607	0.032012	743	4	-1.9569	0.99451	0.99453	1	17622	0	-1.9569
C7orf26	4	0.00034465	0.0012612	0.032012	744	4	-1.3942	0.99966	0.99965	1	18259	0	-1.3942
FBXW11	4	0.0003464	0.0012633	0.032022	745	4	-2.2117	0.99965	0.99965	1	18258	0	-2.2117
USPL1	4	0.00034694	0.0012654	0.032032	746	4	-1.2794	0.99965	0.99965	1	18257	0	-1.2794
PCBP1	4	0.000354	0.0012911	0.032639	747	4	-2.1408	0.99211	0.99212	1	17506	0	-2.1408
DHX33	4	0.00035678	0.0013026	0.032886	748	3	-2.1179	0.9706	0.97064	1	16874	0	-2.1179
SBDS	4	0.00035853	0.0013074	0.032961	749	4	-1.141	0.99964	0.99964	1	18256	0	-1.141
NCAPD2	4	0.00035958	0.00131	0.032983	750	4	-1.3909	0.98933	0.98933	1	17401	0	-1.3909
WEE1	4	0.00036033	0.0013126	0.033005	751	4	-1.5601	0.99964	0.99964	1	18255	0	-1.5601
PRPF3	4	0.000362	0.0013226	0.033212	752	4	-0.99257	0.99964	0.99964	1	18254	0	-0.99257
FPGS	4	0.00036227	0.0013252	0.033233	753	4	-2.0671	0.99964	0.99963	1	18253	0	-2.0671
RPL7A	4	0.00036437	0.001333	0.033386	754	4	-1.8177	0.99964	0.99963	1	18252	0	-1.8177
ATXN2L	4	0.00036731	0.0013472	0.033696	755	4	-1.3218	0.99963	0.99963	1	18251	0	-1.3218
NADK	4	0.000369	0.0013561	0.033843	756	4	-1.3185	0.99963	0.99963	1	18250	0	-1.3185
PYCRL	4	0.00036928	0.0013566	0.033843	757	4	-0.62953	0.99963	0.99963	1	18249	0	-0.62953
RPS19	4	0.0003706	0.0013624	0.033942	758	4	-2.3923	0.9945	0.99453	1	17620	0	-2.3923
DMAP1	4	0.00037183	0.0013671	0.034014	759	4	-0.95485	0.99963	0.99962	1	18248	0	-0.95485
ABHD17A	4	0.00037311	0.0013708	0.034061	760	4	-1.628	0.99963	0.99962	1	18247	0	-1.628
SNRPG	4	0.00038314	0.0014033	0.034705	761	4	-1.6623	0.99952	0.99952	1	18203	0	-1.6623
ESPL1	4	0.00038324	0.0014033	0.034705	762	3	-1.202	0.72768	0.7421	1	12777	1	-1.202
NCAPG2	4	0.00038346	0.0014033	0.034705	763	4	-1.4356	0.99962	0.99961	1	18246	0	-1.4356
FARSA	4	0.00038411	0.0014054	0.034705	764	3	-1.8298	0.96096	0.96095	1	16633	0	-1.8298
RRM1	4	0.00038418	0.0014059	0.034705	765	4	-2.5176	0.99962	0.99961	1	18245	0	-2.5176
EIF1AD	4	0.00038549	0.0014091	0.034705	766	4	-1.349	0.99961	0.99961	1	18244	0	-1.349
METTL1	4	0.00038608	0.0014112	0.034705	767	4	-0.92706	0.99961	0.99961	1	18243	0	-0.92706
TMEM199	4	0.00038637	0.0014127	0.034705	768	4	-1.5764	0.99961	0.99961	1	18242	0	-1.5764
UTP15	4	0.00038666	0.0014133	0.034705	769	4	-1.5557	0.99961	0.99961	1	18241	0	-1.5557
VWA9	4	0.00038798	0.0014164	0.034737	770	4	-1.603	0.99961	0.99961	1	18240	0	-1.603
PMF1-BGLAP	4	0.00038967	0.0014264	0.034884	771	4	-1.7533	0.99899	0.99898	1	18043	0	-1.7533
GEMIN2	4	0.00039018	0.0014274	0.034884	772	4	-1.205	0.99961	0.99961	1	18238	0	-1.205
TP53INP1	4	0.00039077	0.0014279	0.034884	773	4	-0.70296	0.99961	0.99961	1	18237	0	-0.70296
NIPBL	4	0.0003933	0.0014395	0.03512	774	4	-2.0645	0.99894	0.99893	1	18033	0	-2.0645
TARS2	4	0.00039536	0.0014463	0.035241	775	4	-1.9573	0.9996	0.9996	1	18236	0	-1.9573
CKAP5	4	0.00039714	0.0014515	0.035278	776	4	-1.4595	0.9996	0.9996	1	18235	0	-1.4595
RSL24D1	4	0.00039739	0.0014515	0.035278	777	3	-1.4844	0.95615	0.9562	1	16548	0	-1.4844
UTP11L	4	0.00039923	0.0014568	0.03536	778	4	-1.8418	0.9996	0.9996	1	18234	0	-1.8418
SPRR2B	4	0.00040178	0.0014652	0.035518	779	4	-1.3064	0.9996	0.99959	1	18233	0	-1.3064
NFS1	4	0.00040701	0.0014898	0.036027	780	4	-2.3925	0.9993	0.99931	1	18120	0	-2.3925
VMP1	4	0.00040753	0.0014914	0.036027	781	4	-2.1358	0.99959	0.99959	1	18231	0	-2.1358
CBWD5	4	0.00040769	0.0014919	0.036027	782	4	-2.6105	0.9993	0.99931	1	18119	0	-2.6105
ANKRD20A3	4	0.00041088	0.0015013	0.036209	783	4	-1.2213	0.99959	0.99959	1	18230	0	-1.2213
CGB	4	0.00041149	0.001504	0.036226	784	4	-1.2141	0.99959	0.99959	1	18229	0	-1.2141
MTO1	4	0.0004118	0.0015066	0.036243	785	4	-1.3212	0.99959	0.99959	1	18228	0	-1.3212
CHTF18	4	0.00041347	0.0015139	0.036364	786	4	-2.7834	0.99944	0.99945	1	18170	0	-2.7834
SMC3	4	0.00041395	0.0015155	0.036364	787	4	-1.8333	0.99959	0.99959	1	18227	0	-1.8333
UTP23	4	0.00041552	0.0015187	0.036394	788	4	-1.5237	0.99402	0.99407	1	17602	0	-1.5237
RRP15	4	0.00041626	0.0015234	0.03646	789	4	-1.223	0.99958	0.99958	1	18226	0	-1.223
CDK12	4	0.00041796	0.0015281	0.036526	790	4	-1.3476	0.99958	0.99958	1	18225	0	-1.3476
SF3B3	4	0.00041999	0.0015328	0.036526	791	4	-1.8078	0.99954	0.99954	1	18205	0	-1.8078
CDT1	4	0.00042055	0.0015339	0.036526	792	4	-1.6312	0.99956	0.99956	1	18213	0	-1.6312
PCID2	4	0.0004206	0.0015339	0.036526	793	4	-1.5575	0.99958	0.99958	1	18224	0	-1.5575
RPS19BP1	4	0.00042404	0.0015438	0.036717	794	4	-1.1817	0.99958	0.99958	1	18223	0	-1.1817
TRIT1	4	0.00043176	0.0015721	0.037315	795	4	-1.4376	0.99957	0.99957	1	18222	0	-1.4376
RPL26	4	0.00043208	0.0015729	0.037315	796	4	-1.1887	0.99957	0.99957	1	18221	0	-1.1887
SMG5	4	0.00043287	0.0015758	0.037337	797	4	-1.2453	0.99957	0.99957	1	18220	0	-1.2453
IARS	4	0.00043335	0.0015789	0.037364	798	4	-2.1021	0.99957	0.99957	1	18219	0	-2.1021
MRPL36	4	0.00043431	0.0015858	0.037466	799	3	-1.8307	0.86197	0.86187	1	14797	0	-1.8307
PMPCA	4	0.00043542	0.0015884	0.037466	800	4	-1.5885	0.99956	0.99957	1	18218	0	-1.5885
CHURC1-FNTB	4	0.00043607	0.0015892	0.037466	801	3	-1.9497	0.36645	0.51068	1	9171	1	-1.9497
COX6B1	4	0.00043895	0.0015999	0.037672	802	4	-1.8485	0.99956	0.99956	1	18217	0	-1.8485
ACTR1A	4	0.00044217	0.0016125	0.037921	803	4	-1.2091	0.99956	0.99956	1	18216	0	-1.2091
POMZP3	4	0.00044282	0.0016146	0.037923	804	4	-1.2155	0.99956	0.99956	1	18215	0	-1.2155
PSMC5	4	0.0004446	0.001623	0.038073	805	4	-1.2648	0.99956	0.99956	1	18212	0	-1.2648
ATP5H	4	0.00044606	0.001633	0.038259	806	4	-2.8893	0.99955	0.99955	1	18211	0	-2.8893
EXOSC9	4	0.00044821	0.0016413	0.038397	807	4	-1.7154	0.99512	0.99512	1	17653	0	-1.7154
DNAJC17	4	0.00044857	0.0016429	0.038397	808	4	-1.4299	0.99438	0.9944	1	17616	0	-1.4299
MRPS6	4	0.00044949	0.0016508	0.038533	809	4	-1.4115	0.99955	0.99955	1	18210	0	-1.4115
POLR3A	4	0.00045037	0.0016555	0.038596	810	4	-2.4391	0.99906	0.99906	1	18060	0	-2.4391
ESF1	4	0.0004511	0.0016586	0.038621	811	4	-1.9529	0.99954	0.99954	1	18206	0	-1.9529
SEPHS2	4	0.00045228	0.0016628	0.038671	812	4	-1.2835	0.99955	0.99955	1	18209	0	-1.2835
SLC52A2	4	0.0004569	0.0016791	0.038966	813	4	-1.1394	0.99954	0.99955	1	18208	0	-1.1394
DEXI	4	0.00045756	0.0016801	0.038966	814	4	-0.99199	0.99954	0.99954	1	18207	0	-0.99199
EIF3B	4	0.00045838	0.0016817	0.038966	815	3	-1.7542	0.98469	0.98467	1	17254	0	-1.7542
PSMA2	4	0.00046425	0.0017048	0.039452	816	3	-2.4977	0.50434	0.61444	1	10779	1	-2.4977
CRCP	4	0.00046826	0.0017205	0.039768	817	4	-1.1073	0.99953	0.99953	1	18204	0	-1.1073
MTG1	4	0.00046981	0.0017273	0.039876	818	4	-1.2719	0.99815	0.99814	1	17905	0	-1.2719
BCL2L2-PABPN1	4	0.00047615	0.0017478	0.040299	819	3	-2.5622	0.89486	0.89481	1	15397	0	-2.5622
EIF3G	4	0.00048121	0.001764	0.040624	820	4	-1.4667	0.99952	0.99952	1	18201	0	-1.4667
RPA2	4	0.00048467	0.0017771	0.040789	821	4	-1.633	0.99952	0.99951	1	18199	0	-1.633
UBR4	4	0.00048483	0.0017771	0.040789	822	3	-1.3903	0.8635	0.86341	1	14824	0	-1.3903
NOL6	4	0.00048519	0.0017777	0.040789	823	4	-1.9499	0.99951	0.99951	1	18198	0	-1.9499
PSTK	4	0.00048635	0.0017813	0.040824	824	4	-0.98882	0.99735	0.99735	1	17812	0	-0.98882
CCDC94	4	0.00048749	0.001784	0.040834	825	3	-1.3404	0.85273	0.8526	1	14645	0	-1.3404
RNMT	4	0.00049092	0.0017965	0.041072	826	3	-1.8995	0.42521	0.57155	1	10089	1	-1.8995
CDC23	4	0.00049514	0.0018133	0.041368	827	3	-1.9866	0.88612	0.8861	1	15238	0	-1.9866
POP7	4	0.00049549	0.0018138	0.041368	828	4	-1.7892	0.9995	0.99951	1	18197	0	-1.7892
MEPCE	4	0.00049813	0.0018259	0.041542	829	4	-1.6225	0.9995	0.9995	1	18196	0	-1.6225
XRCC5	4	0.00050912	0.0018563	0.042183	830	4	-2.0881	0.99881	0.99879	1	18012	0	-2.0881
ASIC1	4	0.00051026	0.0018589	0.042192	831	4	-0.64694	0.99949	0.99949	1	18195	0	-0.64694
C17orf70	4	0.00051116	0.0018673	0.042332	832	4	-1.5686	0.99949	0.99949	1	18194	0	-1.5686
BUD13	4	0.00051504	0.001882	0.042613	833	4	-0.91107	0.99948	0.99949	1	18193	0	-0.91107
RPL34	4	0.00051659	0.0018867	0.042669	834	4	-2.3378	0.99948	0.99949	1	18192	0	-2.3378
FASTKD5	4	0.000517	0.0018893	0.042677	835	3	-1.0398	0.11698	0.24494	0.915597	5050	1	-1.0398
RAD51C	4	0.00051804	0.001893	0.042709	836	4	-1.3007	0.99948	0.99949	1	18191	0	-1.3007
RNPC3	4	0.00052151	0.0019066	0.042965	837	4	-1.3446	0.99948	0.99948	1	18190	0	-1.3446
CHMP3	4	0.00052455	0.0019176	0.043079	838	3	-1.4481	0.14333	0.27958	0.942631	5598	1	-1.4481
GTPBP8	4	0.00052481	0.0019182	0.043079	839	4	-0.91847	0.99948	0.99948	1	18189	0	-0.91847
SPAG1	4	0.00052554	0.0019197	0.043079	840	4	-1.1553	0.99947	0.99948	1	18188	0	-1.1553
MRPS18B	4	0.00052609	0.0019208	0.043079	841	4	-1.0074	0.99947	0.99948	1	18187	0	-1.0074
RHPN1	4	0.00052794	0.001926	0.043137	842	4	-1.3467	0.99947	0.99948	1	18186	0	-1.3467
HAUS6	4	0.00052867	0.0019287	0.043137	843	4	-0.88333	0.99947	0.99948	1	18185	0	-0.88333
RPP30	4	0.0005296	0.0019302	0.043137	844	4	-1.3549	0.99947	0.99948	1	18184	0	-1.3549
FANCI	4	0.00053052	0.001935	0.043191	845	4	-1.1132	0.99947	0.99948	1	18183	0	-1.1132
RPS7	4	0.00053178	0.0019407	0.043229	846	3	-2.488	0.89958	0.89953	1	15469	0	-2.488
PDCL	4	0.00053201	0.0019412	0.043229	847	4	-0.76512	0.99947	0.99948	1	18182	0	-0.76512
C16orf59	4	0.00053554	0.0019523	0.043423	848	4	-1.2538	0.99946	0.99947	1	18180	0	-1.2538
DDX51	4	0.0005376	0.0019596	0.043514	849	4	-1.4984	0.99946	0.99947	1	18179	0	-1.4984
MYBL2	4	0.00053872	0.0019627	0.043514	850	4	-1.2642	0.99946	0.99947	1	18178	0	-1.2642
HYOU1	4	0.00053891	0.0019633	0.043514	851	4	-1.7012	0.99946	0.99947	1	18177	0	-1.7012
SEH1L	4	0.0005406	0.0019706	0.043626	852	4	-2.4091	0.99946	0.99947	1	18176	0	-2.4091
CCT6A	4	0.0005438	0.0019806	0.043795	853	4	-2.2277	0.99946	0.99947	1	18175	0	-2.2277
UHRF1	4	0.00054588	0.001989	0.043929	854	4	-1.2664	0.99945	0.99947	1	18174	0	-1.2664
IFITM3	4	0.00054807	0.0019952	0.044017	855	3	-1.75	0.98284	0.98285	1	17201	0	-1.75
MIS18BP1	4	0.00055177	0.0020094	0.044277	856	4	-1.2163	0.99945	0.99946	1	18173	0	-1.2163
PTDSS1	4	0.00055425	0.0020167	0.04437	857	4	-1.5639	0.99945	0.99945	1	18172	0	-1.5639
NDNL2	4	0.00055502	0.0020183	0.04437	858	4	-2.4417	0.99944	0.99945	1	18171	0	-2.4417
UMPS	4	0.00055716	0.0020325	0.044612	859	3	-1.9488	0.96578	0.9658	1	16755	0	-1.9488
ABCE1	4	0.00055758	0.002034	0.044612	860	4	-1.9424	0.99839	0.99837	1	17939	0	-1.9424
SNRNP35	4	0.00055883	0.0020382	0.044652	861	4	-1.1517	0.99918	0.99917	1	18086	0	-1.1517
MED21	4	0.00056447	0.0020666	0.04522	862	4	-1.2899	0.99944	0.99945	1	18168	0	-1.2899
SUMO1	4	0.00056525	0.0020723	0.045294	863	4	-1.1411	0.99943	0.99945	1	18167	0	-1.1411
SLC25A44	4	0.00056636	0.002077	0.045344	864	3	-1.113	0.98023	0.9803	1	17115	0	-1.113
UQCRFS1	4	0.00056856	0.0020875	0.045479	865	4	-1.3054	0.99943	0.99944	1	18166	0	-1.3054
TSR2	4	0.00056875	0.002088	0.045479	866	4	-1.8383	0.99943	0.99944	1	18165	0	-1.8383
SRP9	4	0.00057071	0.0020943	0.045564	867	4	-1.0229	0.99943	0.99944	1	18164	0	-1.0229
UBE2I	4	0.00057384	0.0021027	0.045694	868	4	-1.9199	0.99943	0.99944	1	18163	0	-1.9199
SLX4	4	0.0005762	0.0021122	0.045846	869	4	-1.4153	0.99942	0.99944	1	18162	0	-1.4153
EEF1G	4	0.00058085	0.0021253	0.046078	870	4	-0.93776	0.99942	0.99943	1	18160	0	-0.93776
STARD7	4	0.00058512	0.0021373	0.046286	871	4	-1.0615	0.99941	0.99943	1	18159	0	-1.0615
NMD3	4	0.00058677	0.0021418	0.046329	872	4	-1.5458	0.99865	0.99861	1	17980	0	-1.5458
AQR	4	0.00059032	0.0021531	0.046436	873	4	-1.4638	0.99941	0.99942	1	18157	0	-1.4638
MRPL12	4	0.00059053	0.0021536	0.046436	874	4	-1.897	0.99941	0.99942	1	18156	0	-1.897
UBA3	4	0.00059065	0.0021541	0.046436	875	3	-1.8087	0.95705	0.95706	1	16569	0	-1.8087
MIS18A	4	0.00059454	0.0021667	0.046654	876	4	-2.2729	0.98662	0.98657	1	17310	0	-2.2729
C9orf114	4	0.00059758	0.0021777	0.046777	877	4	-1.4739	0.9994	0.99942	1	18154	0	-1.4739
DDX46	4	0.00059759	0.0021777	0.046777	878	4	-2.5364	0.99743	0.99741	1	17821	0	-2.5364
RPS5	4	0.00059802	0.0021798	0.046777	879	4	-1.5291	0.99876	0.99874	1	18003	0	-1.5291
ERCC2	4	0.00059936	0.0021856	0.046794	880	3	-2.6509	0.84208	0.84193	1	14475	0	-2.6509
WDR25	4	0.00059941	0.0021856	0.046794	881	4	-1.382	0.9994	0.99942	1	18153	0	-1.382
SNIP1	4	0.00060282	0.0021961	0.046965	882	3	-1.0988	0.91377	0.91377	1	15734	0	-1.0988
ATIC	4	0.00060573	0.0022071	0.047147	883	4	-1.7789	0.99939	0.99941	1	18152	0	-1.7789
MRPS30	4	0.00060721	0.0022139	0.047239	884	4	-1.4662	0.99898	0.99896	1	18038	0	-1.4662
DHPS	4	0.0006088	0.0022196	0.047309	885	4	-1.8392	0.99939	0.99941	1	18151	0	-1.8392
TBCD	4	0.00061074	0.0022254	0.047379	886	3	-1.4183	0.9606	0.96062	1	16626	0	-1.4183
JTB	4	0.00062018	0.0022632	0.048128	887	4	-0.99594	0.99938	0.99939	1	18150	0	-0.99594
DLST	4	0.00062095	0.0022663	0.048141	888	3	-1.8568	0.23834	0.37829	1	7124	1	-1.8568
ACO2	3	0.00062267	0.0018207	0.041473	889	3	-0.98547	0.99938	0.99939	1	18149	0	-0.98547
ELP2	4	0.00062274	0.002271	0.048166	890	3	-1.5352	0.94354	0.94363	1	16295	0	-1.5352
HIST1H2AI	4	0.00062414	0.0022726	0.048166	891	4	-2.8009	0.99938	0.99939	1	18148	0	-2.8009
ILF3	4	0.00062666	0.0022826	0.048323	892	4	-1.7299	0.99937	0.99939	1	18147	0	-1.7299
RPS14	4	0.00062876	0.0022889	0.048402	893	4	-2.4536	0.99937	0.99938	1	18146	0	-2.4536
DPY30	4	0.00063044	0.0022957	0.048492	894	4	-0.90873	0.99937	0.99938	1	18145	0	-0.90873
RPL39	4	0.00063171	0.0022983	0.048493	895	4	-1.4821	0.99937	0.99938	1	18144	0	-1.4821
ABHD11	4	0.00063399	0.0023083	0.048649	896	3	-1.7987	0.97538	0.97552	1	16986	0	-1.7987
ELP5	4	0.00063489	0.0023135	0.048661	897	3	-1.5209	0.82606	0.82601	1	14212	0	-1.5209
SNAPIN	4	0.0006351	0.002314	0.048661	898	4	-0.99817	0.99936	0.99938	1	18143	0	-0.99817
DNTTIP2	4	0.00063999	0.0023292	0.048894	899	4	-0.93779	0.99936	0.99937	1	18141	0	-0.93779
ATG9A	4	0.0006408	0.0023303	0.048894	900	3	-1.0624	0.98141	0.98142	1	17154	0	-1.0624
HCFC1	4	0.00064255	0.0023376	0.048994	901	4	-1.81	0.99936	0.99937	1	18139	0	-1.81
MRPS10	4	0.00064362	0.0023408	0.049006	902	4	-1.5485	0.99936	0.99937	1	18138	0	-1.5485
TTC27	4	0.00064662	0.0023512	0.049171	903	4	-1.9827	0.99935	0.99937	1	18137	0	-1.9827
ALG1L2	4	0.00064996	0.0023644	0.049346	904	3	-1.4172	0.86587	0.86579	1	14873	0	-1.4172
NUP85	4	0.00065007	0.0023649	0.049346	905	4	-1.8411	0.99935	0.99936	1	18136	0	-1.8411
ISG20L2	4	0.00065244	0.0023696	0.04939	906	4	-1.7818	0.99935	0.99936	1	18135	0	-1.7818
TRIM49D2	4	0.00065678	0.0023869	0.049663	907	4	-0.77485	0.99934	0.99936	1	18133	0	-0.77485
NAE1	4	0.00065781	0.0023906	0.049663	908	3	-1.3973	0.89397	0.89391	1	15380	0	-1.3973
CFAP20	4	0.0006582	0.0023932	0.049663	909	4	-1.4363	0.99934	0.99936	1	18132	0	-1.4363
SLC7A13	4	0.00065827	0.0023932	0.049663	910	3	-0.98549	0.39758	0.54288	1	9651	1	-0.98549
SNAPC5	4	0.00066048	0.0024011	0.049771	911	4	-1.2598	0.99934	0.99935	1	18130	0	-1.2598
CHKA	4	0.0006642	0.0024136	0.049977	912	4	-1.0037	0.99934	0.99935	1	18129	0	-1.0037
MRPL51	4	0.00066853	0.0024315	0.050256	913	4	-1.9536	0.99916	0.99915	1	18084	0	-1.9536
GOLGA8K	4	0.00066994	0.0024367	0.050256	914	4	-1.1191	0.98943	0.98942	1	17406	0	-1.1191
EXOSC8	4	0.00067014	0.0024367	0.050256	915	4	-1.3916	0.99933	0.99935	1	18128	0	-1.3916
SLC39A4	4	0.00067081	0.0024378	0.050256	916	4	-0.73571	0.99933	0.99934	1	18127	0	-0.73571
RAD51D	4	0.00067147	0.0024409	0.050266	917	4	-2.0999	0.99933	0.99934	1	18126	0	-2.0999
MRPL54	4	0.00067835	0.0024671	0.050751	918	4	-1.3427	0.99932	0.99934	1	18124	0	-1.3427
MRPS18C	4	0.00068483	0.0024902	0.051169	919	4	-1.4573	0.99932	0.99933	1	18123	0	-1.4573
POLR2D	4	0.00068602	0.0024944	0.0512	920	4	-1.5045	0.99566	0.99564	1	17675	0	-1.5045
TRAIP	4	0.00069031	0.0025075	0.051413	921	4	-1.9362	0.99888	0.99886	1	18025	0	-1.9362
LARP1	4	0.00069521	0.0025279	0.051776	922	4	-0.75015	0.9993	0.99932	1	18122	0	-0.75015
CMTR1	4	0.00069862	0.0025395	0.051956	923	4	-1.478	0.9993	0.99931	1	18121	0	-1.478
NMT1	4	0.00070477	0.0025615	0.05235	924	3	-2.0448	0.97762	0.97778	1	17049	0	-2.0448
DGCR14	4	0.00070552	0.0025667	0.0524	925	4	-1.7776	0.99911	0.99911	1	18072	0	-1.7776
TRMT12	4	0.00070639	0.0025709	0.052429	926	4	-0.83795	0.99929	0.99931	1	18118	0	-0.83795
DAXX	4	0.00071146	0.0025919	0.0528	927	4	-1.7701	0.99929	0.9993	1	18117	0	-1.7701
RBM25	4	0.00071305	0.0025987	0.052882	928	4	-1.5577	0.99615	0.99615	1	17716	0	-1.5577
DHODH	4	0.00071562	0.0026055	0.052963	929	4	-1.5005	0.99928	0.9993	1	18116	0	-1.5005
PRAMEF1	4	0.00071893	0.0026139	0.053077	930	3	-1.0829	0.29121	0.43291	1	7950	1	-1.0829
PPIH	4	0.00072074	0.0026202	0.053147	931	4	-1.0851	0.99928	0.99929	1	18115	0	-1.0851
OSBP	4	0.00072139	0.0026239	0.053165	932	4	-2.3157	0.98759	0.98757	1	17345	0	-2.3157
RBMX	4	0.00072377	0.0026302	0.053235	933	4	-1.0443	0.99928	0.99929	1	18114	0	-1.0443
NDUFC2-KCTD14	4	0.00072484	0.0026333	0.053242	934	3	-2.2133	0.83099	0.83099	1	14290	0	-2.2133
UBE2M	4	0.00072635	0.0026386	0.053265	935	4	-1.983	0.99927	0.99928	1	18113	0	-1.983
GARS	4	0.00072658	0.0026401	0.053265	936	4	-1.7936	0.99927	0.99928	1	18112	0	-1.7936
WDR3	4	0.00072799	0.0026449	0.053304	937	4	-1.7387	0.99927	0.99928	1	18111	0	-1.7387
CENPL	4	0.0007294	0.0026538	0.053407	938	4	-1.2343	0.99927	0.99928	1	18110	0	-1.2343
MTG2	4	0.00073058	0.0026564	0.053407	939	4	-1.9164	0.99927	0.99928	1	18109	0	-1.9164
GEMIN6	4	0.00073129	0.0026585	0.053407	940	3	-2.1651	0.89136	0.89132	1	15337	0	-2.1651
GTF2H4	4	0.00074177	0.0026941	0.054046	941	4	-1.3549	0.99779	0.99779	1	17869	0	-1.3549
GTF3C1	4	0.00074328	0.0026973	0.054046	942	3	-1.6495	0.9289	0.92902	1	16009	0	-1.6495
RNF19A	4	0.00074409	0.0026989	0.054046	943	4	-1.0656	0.99926	0.99926	1	18107	0	-1.0656
TXNRD1	4	0.00074688	0.0027104	0.054219	944	4	-2.4712	0.99823	0.99822	1	17910	0	-2.4712
SOD1	4	0.000752	0.0027303	0.054555	945	4	-2.0218	0.99925	0.99925	1	18106	0	-2.0218
PSMD8	4	0.00075273	0.0027329	0.054555	946	4	-1.9525	0.99925	0.99925	1	18105	0	-1.9525
MRPL32	4	0.00075901	0.0027544	0.054889	947	4	-1.0745	0.99924	0.99925	1	18104	0	-1.0745
POLR2C	4	0.00075925	0.0027555	0.054889	948	4	-1.9633	0.99924	0.99925	1	18103	0	-1.9633
POLR1E	4	0.00076484	0.0027765	0.055248	949	4	-1.8064	0.99924	0.99924	1	18102	0	-1.8064
DDX41	4	0.00076655	0.0027833	0.055266	950	4	-1.1683	0.99923	0.99924	1	18101	0	-1.1683
MFAP1	4	0.00076801	0.002788	0.055266	951	4	-1.0977	0.99923	0.99923	1	18100	0	-1.0977
ELAVL1	4	0.00076826	0.0027885	0.055266	952	4	-0.85588	0.99923	0.99923	1	18099	0	-0.85588
METTL16	4	0.00076875	0.002789	0.055266	953	4	-1.0079	0.99923	0.99923	1	18098	0	-1.0079
POLRMT	4	0.00077073	0.0027974	0.055337	954	3	-1.4794	0.98395	0.98394	1	17227	0	-1.4794
CNOT1	4	0.00077125	0.0027985	0.055337	955	3	-1.4164	0.862	0.86189	1	14798	0	-1.4164
FDXR	4	0.00078577	0.0028462	0.056221	956	4	-1.596	0.99921	0.99921	1	18096	0	-1.596
RRP12	4	0.0007895	0.0028604	0.056442	957	4	-2.5574	0.99921	0.99921	1	18095	0	-2.5574
CDCA8	4	0.00079118	0.0028635	0.056445	958	3	-1.2891	0.41109	0.55695	1	9860	1	-1.2891
DR1	4	0.00079478	0.0028787	0.056685	959	3	-1.5513	0.24797	0.38823	1	7296	1	-1.5513
NANS	4	0.0008008	0.0029012	0.056972	960	4	-0.6675	0.9992	0.9992	1	18093	0	-0.6675
OR11H2	4	0.00080095	0.0029012	0.056972	961	3	-1.5451	0.94215	0.94219	1	16253	0	-1.5451
CCT5	4	0.00080148	0.0029023	0.056972	962	3	-2.581	0.97602	0.97619	1	17009	0	-2.581
ATPAF2	4	0.00080332	0.0029102	0.05702	963	4	-0.5285	0.9992	0.99919	1	18092	0	-0.5285
HAUS4	4	0.00080383	0.0029123	0.05702	964	4	-2.1378	0.9992	0.99919	1	18091	0	-2.1378
RPN2	4	0.00080484	0.0029138	0.05702	965	4	-1.9268	0.9992	0.99919	1	18090	0	-1.9268
VPS16	4	0.0008089	0.0029217	0.057077	966	4	-1.053	0.99919	0.99919	1	18089	0	-1.053
TIMM9	4	0.00080915	0.0029227	0.057077	967	4	-1.0409	0.99919	0.99919	1	18088	0	-1.0409
UBAP1	4	0.00081102	0.0029285	0.057092	968	3	-1.0906	0.84839	0.84827	1	14574	0	-1.0906
TRAPPC5	4	0.00081119	0.0029296	0.057092	969	4	-1.9757	0.99919	0.99919	1	18087	0	-1.9757
SF3B1	4	0.00081472	0.0029416	0.057268	970	2	-0.7998	0.53216	0.62744	1	10978	1	-0.7998
HIST1H2AC	4	0.00082115	0.0029626	0.057616	971	2	-0.62697	0.38093	0.52563	1	9387	1	-0.62697
ALYREF	4	0.0008257	0.0029799	0.057893	972	3	-2.0619	0.93119	0.93131	1	16045	0	-2.0619
TRAPPC1	4	0.00082708	0.0029851	0.057936	973	4	-1.8959	0.99662	0.99665	1	17748	0	-1.8959
GMPPB	4	0.00083046	0.0029977	0.05812	974	4	-1.7853	0.99917	0.99917	1	18085	0	-1.7853
RPS10-NUDT3	4	0.0008423	0.0030428	0.058934	975	2	-1.7565	0.29317	0.43489	1	7984	2	-1.7565
UQCR10	4	0.00084416	0.0030496	0.059005	976	2	-1.1998	0.91664	0.91668	1	15782	0	-1.1998
PPCDC	4	0.000851	0.0030758	0.059452	977	4	-1.0131	0.99915	0.99914	1	18083	0	-1.0131
MTIF2	4	0.00085351	0.0030869	0.059583	978	4	-1.6466	0.99915	0.99914	1	18082	0	-1.6466
METTL14	4	0.00085417	0.0030916	0.059583	979	4	-0.9039	0.99915	0.99914	1	18081	0	-0.9039
PRAMEF5	4	0.00085486	0.0030921	0.059583	980	4	-2.0748	0.99643	0.99646	1	17733	0	-2.0748
PFDN2	4	0.00085651	0.0030973	0.059623	981	3	-1.9924	0.76667	0.77204	1	13275	1	-1.9924
POP5	4	0.00085749	0.0031015	0.059643	982	4	-1.9063	0.99914	0.99914	1	18080	0	-1.9063
C15orf41	4	0.00086093	0.0031152	0.059803	983	4	-1.2478	0.99844	0.99842	1	17951	0	-1.2478
DICER1	4	0.00086148	0.0031162	0.059803	984	4	-1.9443	0.99914	0.99913	1	18079	0	-1.9443
RAD52	4	0.00086709	0.0031382	0.060164	985	4	-0.80664	0.99913	0.99913	1	18078	0	-0.80664
BAP1	4	0.00086776	0.0031414	0.060164	986	4	-1.6594	0.99913	0.99913	1	18076	0	-1.6594
PPP1R8	4	0.0008726	0.0031592	0.060444	987	4	-1.4177	0.99782	0.99782	1	17872	0	-1.4177
CCDC64B	4	0.00087596	0.0031734	0.060652	988	4	-0.94384	0.99912	0.99912	1	18075	0	-0.94384
SLC30A9	4	0.00087651	0.0031765	0.060652	989	4	-2.5346	0.98762	0.98761	1	17348	0	-2.5346
PDSS2	4	0.00088001	0.0031949	0.060941	990	4	-1.2453	0.99912	0.99911	1	18074	0	-1.2453
C19orf53	4	0.00088218	0.0032043	0.061059	991	4	-1.1466	0.99912	0.99911	1	18073	0	-1.1466
MED11	4	0.00088719	0.0032195	0.061287	992	3	-2.89	0.94924	0.94927	1	16417	0	-2.89
FAM72D	4	0.00089254	0.0032331	0.061485	993	4	-0.9355	0.99911	0.9991	1	18071	0	-0.9355
MCM3AP	4	0.00090105	0.0032546	0.061757	994	4	-1.413	0.9991	0.99909	1	18069	0	-1.413
CDK6	4	0.0009016	0.0032552	0.061757	995	4	-1.4779	0.9991	0.99909	1	18068	0	-1.4779
SEC13	4	0.00090251	0.0032572	0.061757	996	4	-1.4649	0.99629	0.99631	1	17727	0	-1.4649
NDUFS5	4	0.00090479	0.0032662	0.061864	997	4	-1.9826	0.9975	0.99749	1	17835	0	-1.9826
LIPT2	4	0.00091157	0.0032898	0.062248	998	4	-1.0022	0.99909	0.99908	1	18067	0	-1.0022
CHD4	4	0.00091854	0.0033139	0.062642	999	4	-1.3203	0.99908	0.99908	1	18066	0	-1.3203
ZNHIT6	4	0.00092288	0.0033369	0.062935	1000	4	-1.2824	0.99908	0.99907	1	18065	0	-1.2824
CLSPN	4	0.00092288	0.0033369	0.062935	1001	4	-1.1518	0.99908	0.99907	1	18064	0	-1.1518
MED23	4	0.00092414	0.0033401	0.062935	1002	4	-0.83343	0.99908	0.99907	1	18063	0	-0.83343
MDN1	4	0.0009247	0.0033427	0.062935	1003	4	-1.3317	0.99908	0.99907	1	18062	0	-1.3317
SRSF3	4	0.00092969	0.0033548	0.063099	1004	3	-2.0597	0.8111	0.81128	1	13981	1	-2.0597
GUK1	4	0.00093017	0.00336	0.063135	1005	4	-2.3783	0.99899	0.99897	1	18041	0	-2.3783
UTP3	4	0.0009343	0.0033731	0.063318	1006	4	-1.8767	0.99907	0.99906	1	18061	0	-1.8767
SNUPN	4	0.00093699	0.0033852	0.063446	1007	4	-0.94141	0.99906	0.99906	1	18059	0	-0.94141
PFAS	4	0.00093834	0.0033899	0.063446	1008	4	-2.4405	0.99839	0.99837	1	17940	0	-2.4405
CDC7	4	0.00093951	0.003392	0.063446	1009	3	-2.2324	0.98393	0.98392	1	17225	0	-2.2324
TRIAP1	4	0.0009414	0.0033967	0.063446	1010	4	-1.8911	0.99906	0.99905	1	18058	0	-1.8911
GPT	4	0.00094168	0.0033967	0.063446	1011	4	-1.0653	0.99906	0.99905	1	18057	0	-1.0653
KANSL2	4	0.00094825	0.0034214	0.063843	1012	4	-0.94056	0.99905	0.99905	1	18056	0	-0.94056
NRBP2	4	0.00095009	0.0034297	0.063936	1013	4	-1.3064	0.99902	0.99901	1	18050	0	-1.3064
VRK1	4	0.0009537	0.0034408	0.064078	1014	4	-0.69302	0.99905	0.99904	1	18055	0	-0.69302
ATP5B	4	0.00095629	0.0034523	0.06423	1015	4	-1.5913	0.99904	0.99904	1	18054	0	-1.5913
RPL36AL	4	0.00095745	0.0034575	0.064264	1016	4	-1.1755	0.99904	0.99904	1	18053	0	-1.1755
EIF5	4	0.00097509	0.0035147	0.065262	1017	3	-2.5136	0.98424	0.98421	1	17234	0	-2.5136
CHEK1	4	0.00097629	0.0035184	0.065266	1018	4	-2.0062	0.99489	0.9949	1	17642	0	-2.0062
AK6	4	0.00098308	0.0035419	0.065639	1019	4	-1.1447	0.99902	0.99901	1	18049	0	-1.1447
NDUFA13	4	0.0009878	0.0035629	0.065934	1020	4	-1.1886	0.99901	0.999	1	18048	0	-1.1886
FLI1	4	0.00098987	0.0035692	0.065934	1021	4	-0.95671	0.99901	0.999	1	18047	0	-0.95671
NDUFS3	4	0.00099017	0.0035697	0.065934	1022	4	-0.95938	0.99601	0.996	1	17706	0	-0.95938
COA7	4	0.00099076	0.0035718	0.065934	1023	4	-1.2511	0.99901	0.999	1	18046	0	-1.2511
WDR33	4	0.00099401	0.0035818	0.066053	1024	4	-1.1065	0.99901	0.999	1	18045	0	-1.1065
GSDMD	4	0.00099847	0.0035975	0.066227	1025	4	-1.1791	0.999	0.99899	1	18044	0	-1.1791
NDC80	4	0.00099902	0.0036012	0.066227	1026	4	-1.9956	0.98608	0.98607	1	17295	0	-1.9956
PGM3	4	0.00099929	0.0036017	0.066227	1027	4	-2.6944	0.99845	0.99843	1	17952	0	-2.6944
FAM25G	4	0.0010048	0.0036222	0.066538	1028	3	-1.7226	0.96992	0.96993	1	16858	0	-1.7226
ABCB7	4	0.0010071	0.0036279	0.066579	1029	4	-1.4037	0.98814	0.98815	1	17365	0	-1.4037
MBTPS2	4	0.0010113	0.0036426	0.066784	1030	4	-1.6736	0.99899	0.99898	1	18042	0	-1.6736
SNRPA1	4	0.0010143	0.0036526	0.066901	1031	4	-2.3424	0.99899	0.99897	1	18040	0	-2.3424
RPL38	4	0.0010189	0.0036725	0.067136	1032	4	-1.5317	0.99898	0.99897	1	18039	0	-1.5317
MBD3L5	4	0.0010189	0.0036725	0.067136	1033	3	-1.8585	0.75288	0.7611	1	13104	1	-1.8585
NXT1	4	0.0010356	0.0037359	0.06823	1034	4	-1.4823	0.99483	0.99484	1	17640	0	-1.4823
TPX2	4	0.0010466	0.0037831	0.069025	1035	4	-1.2172	0.99895	0.99894	1	18036	0	-1.2172
AMD1	4	0.0010508	0.0037973	0.069216	1036	3	-1.9653	0.92259	0.9227	1	15884	0	-1.9653
TFAM	4	0.0010533	0.0038078	0.069321	1037	4	-1.9746	0.99749	0.99748	1	17834	0	-1.9746
COPB2	4	0.0010542	0.0038104	0.069321	1038	4	-2.0842	0.99521	0.99521	1	17658	0	-2.0842
TRMT5	4	0.0010562	0.0038209	0.069445	1039	3	-1.2896	0.97929	0.9794	1	17093	0	-1.2896
LARS2	4	0.0010597	0.0038314	0.069569	1040	4	-1.5813	0.99894	0.99893	1	18035	0	-1.5813
RBM17	4	0.0010631	0.0038434	0.069711	1041	4	-1.0832	0.99894	0.99893	1	18034	0	-1.0832
BLM	4	0.0010647	0.0038508	0.06972	1042	3	-1.4456	0.34665	0.49021	1	8853	1	-1.4456
FOXD4L1	4	0.0010687	0.0038644	0.069861	1043	2	-1.0465	0.69777	0.72126	1	12440	1	-1.0465
SUPT5H	4	0.0010691	0.003866	0.069861	1044	4	-1.4606	0.9954	0.99539	1	17664	0	-1.4606
PSMD11	4	0.00107	0.0038696	0.069861	1045	4	-1.2357	0.99893	0.99892	1	18032	0	-1.2357
LONP1	4	0.0010708	0.0038749	0.069889	1046	3	-1.3602	0.95654	0.95654	1	16555	0	-1.3602
PLGLB1	4	0.0010725	0.0038801	0.069916	1047	4	-1.1557	0.99893	0.99891	1	18031	0	-1.1557
RIMBP3	4	0.0010775	0.0038985	0.07018	1048	3	-1.0542	0.92532	0.92545	1	15943	0	-1.0542
GAPDH	4	0.0010934	0.0039551	0.071132	1049	4	-1.9746	0.99891	0.99889	1	18030	0	-1.9746
ATP5J2	4	0.001096	0.0039682	0.071299	1050	3	-2.4288	0.94147	0.9415	1	16242	0	-2.4288
ANKRD20A1	4	0.0011002	0.0039829	0.071495	1051	3	-1.6403	0.32146	0.46406	1	8424	1	-1.6403
CIRH1A	4	0.0011052	0.0040007	0.071747	1052	4	-2.1814	0.99842	0.9984	1	17945	0	-2.1814
NCOA2	4	0.0011113	0.0040212	0.071871	1053	4	-0.94337	0.99889	0.99887	1	18029	0	-0.94337
RPS15	4	0.0011118	0.0040222	0.071871	1054	4	-2.4419	0.99882	0.9988	1	18013	0	-2.4419
SF3B2	4	0.0011124	0.0040248	0.071871	1055	4	-1.7002	0.99579	0.99577	1	17686	0	-1.7002
NSA2	4	0.0011131	0.0040269	0.071871	1056	4	-1.3957	0.9973	0.99729	1	17802	0	-1.3957
KDM3A	4	0.0011139	0.0040301	0.071871	1057	4	-1.0209	0.99889	0.99887	1	18028	0	-1.0209
METTL17	4	0.001115	0.0040327	0.071871	1058	4	-1.5472	0.99615	0.99616	1	17718	0	-1.5472
UBA2	4	0.0011158	0.0040343	0.071871	1059	4	-1.4821	0.99888	0.99887	1	18027	0	-1.4821
ATP6V1G1	4	0.0011177	0.0040406	0.071894	1060	3	-2.0871	0.69721	0.72088	1	12431	1	-2.0871
AMY1A	4	0.0011196	0.0040479	0.071894	1061	3	-1.202	0.94021	0.94026	1	16225	0	-1.202
NARS2	4	0.0011203	0.00405	0.071894	1062	4	-1.1708	0.99415	0.99419	1	17606	0	-1.1708
NEDD1	4	0.0011213	0.0040521	0.071894	1063	4	-1.1015	0.99888	0.99886	1	18026	0	-1.1015
PSMA3	4	0.001123	0.0040573	0.071894	1064	4	-1.6912	0.99888	0.99886	1	18024	0	-1.6912
RPS28	4	0.0011239	0.0040584	0.071894	1065	4	-1.4459	0.99888	0.99886	1	18023	0	-1.4459
MINOS1	4	0.00113	0.0040767	0.072151	1066	3	-1.7201	0.72239	0.7383	1	12719	1	-1.7201
DYNC1H1	4	0.0011364	0.0040982	0.072464	1067	2	-1.083	0.90754	0.90751	1	15621	0	-1.083
FOXRED1	4	0.0011383	0.0041071	0.072553	1068	4	-1.0654	0.99886	0.99884	1	18022	0	-1.0654
CUL3	4	0.0011408	0.0041171	0.072661	1069	3	-1.3241	0.54799	0.63523	1	11094	1	-1.3241
EEF1B2	4	0.0011421	0.0041224	0.072676	1070	3	-1.3729	0.97482	0.97495	1	16962	0	-1.3729
ZBTB11	4	0.0011434	0.0041276	0.072676	1071	3	-1.0508	0.1067	0.22678	0.907121	4716	1	-1.0508
EXOSC5	4	0.0011451	0.0041334	0.072676	1072	4	-1.7623	0.99885	0.99884	1	18021	0	-1.7623
BCS1L	4	0.0011451	0.0041334	0.072676	1073	4	-1.3258	0.99885	0.99884	1	18020	0	-1.3258
EIF2S2	4	0.0011489	0.004147	0.072848	1074	4	-1.8527	0.99885	0.99883	1	18019	0	-1.8527
OR4F29	4	0.0011509	0.0041549	0.072919	1075	4	-2.4586	0.99885	0.99883	1	18018	0	-2.4586
DAP3	4	0.0011532	0.0041643	0.073016	1076	4	-1.4516	0.99885	0.99883	1	18017	0	-1.4516
SLC11A2	4	0.0011562	0.0041774	0.073144	1077	4	-0.9566	0.99884	0.99883	1	18016	0	-0.9566
BRF1	4	0.0011582	0.0041811	0.073144	1078	3	-1.0677	0.47836	0.60265	1	10589	1	-1.0677
VPS72	4	0.0011585	0.0041832	0.073144	1079	4	-1.2271	0.99884	0.99882	1	18015	0	-1.2271
ARL2	4	0.0011598	0.00419	0.073195	1080	4	-1.4375	0.99884	0.99882	1	18014	0	-1.4375
POLD3	4	0.0011669	0.004212	0.073512	1081	4	-1.6769	0.99745	0.99744	1	17825	0	-1.6769
TIMM13	4	0.001171	0.0042241	0.07365	1082	3	-1.1987	0.95095	0.95099	1	16445	0	-1.1987
TCEB2	4	0.0011717	0.0042277	0.07365	1083	4	-2.0227	0.99728	0.99727	1	17801	0	-2.0227
RPUSD3	4	0.001175	0.0042387	0.073774	1084	4	-1.3031	0.99855	0.99851	1	17962	0	-1.3031
EIF1AX	4	0.0011904	0.0042886	0.074572	1085	4	-1.1273	0.99881	0.99879	1	18011	0	-1.1273
DCAF15	4	0.0011935	0.0042996	0.074616	1086	4	-1.2821	0.99881	0.99879	1	18010	0	-1.2821
NKAP	4	0.0011955	0.0043059	0.074616	1087	4	-1.9981	0.99277	0.99279	1	17532	0	-1.9981
RFC5	4	0.0011966	0.0043132	0.074616	1088	4	-1.5135	0.9988	0.99878	1	18009	0	-1.5135
CENPW	4	0.0011969	0.0043143	0.074616	1089	3	-1.6563	0.76425	0.77003	1	13243	1	-1.6563
C15orf57	4	0.0011974	0.0043148	0.074616	1090	4	-1.0281	0.9988	0.99878	1	18007	0	-1.0281
NAA20	4	0.0011974	0.0043148	0.074616	1091	4	-1.275	0.9988	0.99878	1	18008	0	-1.275
WDR75	4	0.0012182	0.0043856	0.07577	1092	4	-1.4562	0.99878	0.99876	1	18006	0	-1.4562
HINFP	4	0.0012371	0.0044542	0.076887	1093	4	-1.6669	0.99829	0.99828	1	17919	0	-1.6669
NDUFAF4	4	0.0012397	0.0044647	0.076997	1094	4	-1.0227	0.99876	0.99874	1	18005	0	-1.0227
SF3A2	4	0.0012418	0.0044689	0.076999	1095	3	-1.7553	0.98441	0.9844	1	17240	0	-1.7553
OLFML2B	4	0.0012468	0.004482	0.077155	1096	4	-0.54721	0.99875	0.99874	1	18002	0	-0.54721
SSRP1	4	0.0012503	0.0044946	0.077214	1097	4	-0.75166	0.99875	0.99873	1	18001	0	-0.75166
XRN2	4	0.001251	0.0044972	0.077214	1098	4	-2.1497	0.99875	0.99873	1	18000	0	-2.1497
DDB1	4	0.0012513	0.0044978	0.077214	1099	4	-1.2677	0.99875	0.99873	1	17999	0	-1.2677
COPB1	4	0.0012576	0.0045224	0.077567	1100	3	-1.4201	0.97938	0.97949	1	17096	0	-1.4201
POLG2	4	0.0012605	0.0045292	0.077613	1101	4	-0.88173	0.99874	0.99872	1	17998	0	-0.88173
LSG1	4	0.001264	0.0045402	0.077731	1102	4	-1.6187	0.9987	0.99867	1	17988	0	-1.6187
ATP5C1	4	0.0012661	0.0045497	0.077822	1103	4	-1.6913	0.98909	0.98909	1	17389	0	-1.6913
INTS5	4	0.0012704	0.0045649	0.078012	1104	3	-1.6972	0.97829	0.97843	1	17072	0	-1.6972
PPP2CA	4	0.0012718	0.0045717	0.07805	1105	3	-1.5963	0.82115	0.8211	1	14129	1	-1.5963
NUDC	4	0.0012733	0.0045754	0.07805	1106	4	-1.2365	0.99873	0.99871	1	17997	0	-1.2365
TFIP11	4	0.001278	0.0045906	0.078177	1107	4	-1.0044	0.99872	0.9987	1	17996	0	-1.0044
SNRPC	4	0.0012782	0.0045911	0.078177	1108	3	-2.1352	0.77382	0.77792	1	13385	1	-2.1352
SDHAF1	4	0.0012823	0.0046037	0.07832	1109	4	-0.76434	0.99872	0.9987	1	17995	0	-0.76434
COX6A1	4	0.0012845	0.00461	0.078349	1110	4	-0.75989	0.99872	0.9987	1	17994	0	-0.75989
DCTN4	4	0.0012852	0.0046136	0.078349	1111	4	-1.2821	0.99871	0.9987	1	17993	0	-1.2821
CHUK	4	0.0012906	0.004632	0.078564	1112	4	-0.77613	0.99871	0.99869	1	17992	0	-0.77613
HYPK	4	0.0012913	0.0046346	0.078564	1113	4	-0.88503	0.99871	0.99869	1	17991	0	-0.88503
CD3EAP	4	0.0012942	0.004644	0.078653	1114	4	-1.0913	0.99871	0.99868	1	17990	0	-1.0913
AHCTF1	4	0.0013025	0.0046697	0.078973	1115	4	-0.87042	0.9987	0.99867	1	17989	0	-0.87042
FNTA	4	0.0013027	0.0046713	0.078973	1116	3	-1.8346	0.60726	0.66637	1	11585	1	-1.8346
CTU1	4	0.0013042	0.0046765	0.078991	1117	4	-1.8552	0.99819	0.99818	1	17907	0	-1.8552
RNF20	4	0.0013062	0.0046844	0.079053	1118	4	-1.5038	0.99869	0.99867	1	17987	0	-1.5038
GOLGA8M	4	0.0013085	0.0046933	0.079133	1119	4	-1.7611	0.99869	0.99866	1	17986	0	-1.7611
SKP2	4	0.0013188	0.0047237	0.07953	1120	4	-1.3277	0.98866	0.98866	1	17378	0	-1.3277
TICRR	4	0.0013193	0.0047253	0.07953	1121	4	-1.9918	0.99868	0.99865	1	17985	0	-1.9918
RPP25L	4	0.0013268	0.0047547	0.079953	1122	3	-1.3355	0.98014	0.98021	1	17110	0	-1.3355
PUM1	4	0.0013378	0.0047924	0.080516	1123	4	-0.70112	0.99866	0.99863	1	17984	0	-0.70112
DNAJC8	4	0.0013408	0.0048003	0.080576	1124	3	-1.8922	0.22669	0.36625	0.997099	6931	1	-1.8922
ZNF281	4	0.0013444	0.0048126	0.080712	1125	4	-1.0654	0.99866	0.99862	1	17983	0	-1.0654
STARD9	4	0.0013485	0.0048286	0.080758	1126	4	-0.60538	0.99865	0.99862	1	17982	0	-0.60538
ACLY	4	0.0013489	0.0048291	0.080758	1127	4	-1.771	0.99865	0.99862	1	17981	0	-1.771
COPG1	4	0.001349	0.0048291	0.080758	1128	4	-0.87721	0.9958	0.99578	1	17688	0	-0.87721
GLI4	4	0.0013517	0.0048386	0.080758	1129	3	-0.97244	0.96951	0.96953	1	16842	0	-0.97244
AGPAT6	4	0.0013519	0.0048396	0.080758	1130	3	-1.6814	0.97901	0.97912	1	17086	0	-1.6814
RPL7L1	4	0.0013534	0.0048459	0.080758	1131	4	-1.2616	0.99761	0.9976	1	17843	0	-1.2616
CENPT	4	0.0013538	0.004848	0.080758	1132	4	-1.0548	0.99865	0.99861	1	17979	0	-1.0548
PPIE	4	0.0013542	0.0048496	0.080758	1133	3	-1.1282	0.51911	0.62128	1	10881	1	-1.1282
CDK9	3	0.0013563	0.0038466	0.069711	1134	3	-2.4877	0.99767	0.99771	1	17850	0	-2.4877
EIF2B1	4	0.0013579	0.0048621	0.080896	1135	3	-1.6015	0.89827	0.89816	1	15450	0	-1.6015
SDHB	4	0.0013699	0.0048973	0.081409	1136	3	-2.6759	0.32288	0.4655	1	8459	1	-2.6759
COG8	4	0.0013714	0.0049057	0.081476	1137	4	-1.9608	0.99207	0.99208	1	17505	0	-1.9608
ZW10	4	0.001376	0.0049219	0.081672	1138	4	-0.98507	0.99862	0.99859	1	17978	0	-0.98507
MED17	4	0.0013774	0.0049261	0.081672	1139	4	-1.981	0.9974	0.99739	1	17818	0	-1.981
CCT2	4	0.0013809	0.0049408	0.081844	1140	4	-2.3654	0.99862	0.99859	1	17977	0	-2.3654
DDX59	4	0.0013851	0.004955	0.082006	1141	4	-1.5485	0.99861	0.99858	1	17976	0	-1.5485
PRKRIP1	4	0.0013908	0.0049738	0.082247	1142	4	-0.61885	0.99861	0.99857	1	17975	0	-0.61885
SRP72	4	0.0013931	0.0049817	0.082273	1143	4	-0.81898	0.99861	0.99857	1	17974	0	-0.81898
SPDL1	4	0.001394	0.0049864	0.082273	1144	4	-1.8737	0.99125	0.99127	1	17474	0	-1.8737
WBSCR22	4	0.0013948	0.0049885	0.082273	1145	3	-1.259	0.67987	0.70957	1	12264	1	-1.259
GADD45GIP1	4	0.0014023	0.0050179	0.082685	1146	4	-1.2946	0.9986	0.99856	1	17973	0	-1.2946
MRPS22	4	0.001406	0.0050289	0.082795	1147	4	-1.8195	0.9949	0.99491	1	17643	0	-1.8195
RNF113A	4	0.0014077	0.0050336	0.0828	1148	4	-1.4556	0.99726	0.99725	1	17799	0	-1.4556
ISCA1	4	0.0014204	0.0050803	0.083422	1149	3	-2.5776	0.94292	0.94298	1	16270	0	-2.5776
ATP6V1E1	4	0.0014204	0.0050803	0.083422	1150	4	-0.84163	0.99858	0.99854	1	17972	0	-0.84163
NUP88	4	0.0014278	0.0051054	0.083763	1151	4	-2.2728	0.99857	0.99853	1	17970	0	-2.2728
MRPS17	4	0.0014292	0.0051112	0.083772	1152	3	-1.4277	0.81004	0.81027	1	13960	1	-1.4277
MRPL13	4	0.0014307	0.0051149	0.083772	1153	4	-1.69	0.99725	0.99724	1	17797	0	-1.69
NPIPA1	4	0.0014338	0.0051274	0.083863	1154	4	-2.2543	0.99589	0.99587	1	17698	0	-2.2543
YPEL3	4	0.0014344	0.0051301	0.083863	1155	4	-1.0229	0.99857	0.99853	1	17969	0	-1.0229
USE1	4	0.0014348	0.0051337	0.083863	1156	4	-0.6529	0.99857	0.99853	1	17968	0	-0.6529
PRPF31	4	0.0014399	0.0051484	0.08403	1157	4	-1.0202	0.99856	0.99853	1	17967	0	-1.0202
CTNNBL1	4	0.0014458	0.0051652	0.084099	1158	4	-1.0029	0.99855	0.99852	1	17965	0	-1.0029
LAMTOR2	4	0.0014462	0.0051678	0.084099	1159	4	-0.74442	0.99855	0.99852	1	17964	0	-0.74442
SARS	4	0.0014462	0.0051683	0.084099	1160	3	-1.5695	0.28373	0.42517	1	7836	1	-1.5695
THAP11	4	0.001447	0.0051704	0.084099	1161	4	-1.2211	0.99789	0.99789	1	17880	0	-1.2211
RTTN	4	0.0014492	0.0051773	0.084137	1162	3	-1.2503	0.25577	0.39622	1	7412	1	-1.2503
OR2T27	4	0.0014517	0.0051825	0.08415	1163	4	-1.2349	0.99855	0.99852	1	17963	0	-1.2349
NDUFS1	4	0.0014602	0.0052124	0.084562	1164	4	-1.9303	0.98749	0.98748	1	17343	0	-1.9303
MED4	4	0.0014675	0.0052365	0.084881	1165	4	-1.0038	0.99853	0.9985	1	17961	0	-1.0038
PPAT	4	0.0014704	0.0052465	0.084969	1166	4	-1.6639	0.9961	0.99609	1	17710	0	-1.6639
GNPNAT1	4	0.0014791	0.0052779	0.085406	1167	4	-1.5171	0.99852	0.99849	1	17960	0	-1.5171
GABPA	4	0.0014907	0.0053162	0.085951	1168	4	-1.2402	0.99851	0.99848	1	17959	0	-1.2402
COPS2	4	0.0014975	0.0053393	0.08625	1169	4	-1.404	0.9985	0.99847	1	17958	0	-1.404
MRPS5	4	0.0015004	0.0053482	0.086321	1170	3	-1.4901	0.87931	0.87932	1	15105	0	-1.4901
MTMR6	4	0.0015036	0.0053639	0.086486	1171	4	-0.67946	0.9985	0.99847	1	17957	0	-0.67946
TOPORS	4	0.0015052	0.0053676	0.086486	1172	4	-0.8245	0.99849	0.99846	1	17956	0	-0.8245
OXA1L	4	0.001514	0.0054064	0.086973	1173	3	-1.3543	0.91684	0.91688	1	15784	0	-1.3543
PIK3C3	4	0.0015148	0.0054074	0.086973	1174	3	-0.78966	0.91148	0.91144	1	15692	0	-0.78966
POP4	4	0.0015158	0.0054116	0.086973	1175	4	-0.91387	0.99848	0.99846	1	17955	0	-0.91387
USP10	4	0.0015301	0.0054661	0.08768	1176	4	-0.92421	0.99812	0.99811	1	17901	0	-0.92421
MED13L	4	0.0015305	0.0054672	0.08768	1177	4	-0.71952	0.99847	0.99844	1	17954	0	-0.71952
CCNH	4	0.0015313	0.0054696	0.08768	1178	4	-1.2736	0.99847	0.99844	1	17953	0	-1.2736
CCT4	4	0.0015376	0.0054887	0.087912	1179	4	-1.577	0.99823	0.99822	1	17911	0	-1.577
LETM1	4	0.0015397	0.0054955	0.087947	1180	4	-1.1473	0.99808	0.99807	1	17895	0	-1.1473
PSMG1	4	0.0015665	0.0055825	0.089163	1181	4	-0.90396	0.99843	0.99841	1	17950	0	-0.90396
WISP1	4	0.0015669	0.0055841	0.089163	1182	4	-0.75737	0.99843	0.99841	1	17949	0	-0.75737
IKBKG	4	0.0015673	0.0055857	0.089163	1183	4	-1.228	0.99843	0.99841	1	17948	0	-1.228
CHAF1B	4	0.0015679	0.0055909	0.089172	1184	4	-1.1152	0.99843	0.99841	1	17947	0	-1.1152
NPIPA2	4	0.0015777	0.0056271	0.089664	1185	3	-1.6452	0.0048401	0.01681	0.572446	554	1	-1.6452
BPTF	4	0.001579	0.0056313	0.089664	1186	4	-0.56826	0.99842	0.9984	1	17946	0	-0.56826
CDC123	4	0.0015822	0.0056418	0.089755	1187	4	-1.175	0.9892	0.98919	1	17392	0	-1.175
SNF8	4	0.0015874	0.0056643	0.090038	1188	4	-0.86165	0.99841	0.99839	1	17944	0	-0.86165
BARD1	4	0.0015908	0.0056738	0.090112	1189	4	-0.91785	0.99841	0.99839	1	17943	0	-0.91785
MVB12B	4	0.001601	0.0057131	0.090661	1190	4	-0.65867	0.9984	0.99838	1	17942	0	-0.65867
DDX1	4	0.0016087	0.0057456	0.0911	1191	4	-1.4221	0.99769	0.99769	1	17854	0	-1.4221
PSMC3	4	0.0016108	0.0057545	0.091165	1192	4	-1.2203	0.99839	0.99837	1	17941	0	-1.2203
TSR3	4	0.0016219	0.0057912	0.091669	1193	4	-1.2042	0.99838	0.99836	1	17938	0	-1.2042
AGO2	4	0.0016261	0.0058122	0.091924	1194	4	-0.8262	0.99837	0.99836	1	17937	0	-0.8262
COPS8	4	0.0016285	0.0058201	0.091971	1195	3	-1.2786	0.095205	0.20643	0.896947	4346	1	-1.2786
PTP4A2	4	0.0016309	0.005829	0.091992	1196	4	-0.50687	0.99837	0.99835	1	17936	0	-0.50687
MDH2	4	0.0016313	0.0058311	0.091992	1197	4	-0.88551	0.99837	0.99835	1	17935	0	-0.88551
SACM1L	4	0.0016321	0.0058368	0.092006	1198	4	-1.6416	0.99015	0.99012	1	17428	0	-1.6416
PAXBP1	4	0.0016397	0.0058604	0.092301	1199	3	-1.3588	0.50737	0.61582	1	10803	1	-1.3588
SAP30BP	4	0.0016414	0.0058662	0.092303	1200	4	-1.2861	0.99834	0.99832	1	17931	0	-1.2861
NOC2L	4	0.0016431	0.0058704	0.092303	1201	3	-1.1075	0.84524	0.84507	1	14531	0	-1.1075
RCC1	4	0.0016455	0.0058772	0.092334	1202	4	-1.1068	0.99835	0.99834	1	17934	0	-1.1068
CDC6	4	0.0016473	0.0058851	0.092334	1203	3	-1.4824	0.62818	0.67822	1	11769	1	-1.4824
MED26	4	0.001649	0.0058898	0.092334	1204	4	-1.1575	0.99561	0.99559	1	17672	0	-1.1575
RRM2	4	0.0016498	0.0058919	0.092334	1205	4	-2.2859	0.99819	0.99819	1	17908	0	-2.2859
GEMIN7	4	0.0016583	0.0059171	0.092651	1206	4	-1.3813	0.98647	0.98643	1	17307	0	-1.3813
MRPL49	4	0.0016616	0.0059291	0.092763	1207	4	-1.3884	0.99834	0.99832	1	17932	0	-1.3884
MTPAP	4	0.0016651	0.0059396	0.09285	1208	4	-1.8088	0.99833	0.99832	1	17930	0	-1.8088
USP7	4	0.0016669	0.0059448	0.092856	1209	4	-0.60298	0.99833	0.99832	1	17929	0	-0.60298
PKM	4	0.0016805	0.0059926	0.093418	1210	4	-0.95416	0.99832	0.9983	1	17926	0	-0.95416
TMEM41B	4	0.0016805	0.0059926	0.093418	1211	4	-0.99417	0.99614	0.99615	1	17714	0	-0.99417
TEX10	4	0.0016818	0.0059957	0.093418	1212	4	-1.4362	0.99832	0.9983	1	17925	0	-1.4362
ASUN	4	0.0016882	0.0060172	0.093676	1213	4	-1.0365	0.98966	0.98963	1	17413	0	-1.0365
MRPS9	4	0.0016963	0.0060481	0.093974	1214	4	-0.99516	0.9983	0.99829	1	17923	0	-0.99516
FAM136A	4	0.0016972	0.0060497	0.093974	1215	4	-0.77073	0.9983	0.99829	1	17922	0	-0.77073
CLK2	4	0.0016977	0.0060513	0.093974	1216	3	-1.1857	0.73185	0.7451	1	12836	1	-1.1857
TUBGCP6	4	0.0017072	0.0060817	0.094369	1217	4	-0.91281	0.99341	0.99344	1	17560	0	-0.91281
KANSL1	4	0.0017097	0.0060932	0.09447	1218	4	-0.96283	0.99829	0.99828	1	17918	0	-0.96283
ZNF704	4	0.0017168	0.0061163	0.09475	1219	4	-1.0415	0.99828	0.99827	1	17917	0	-1.0415
DPF1	4	0.0017186	0.0061226	0.09477	1220	4	-1.1209	0.99828	0.99827	1	17916	0	-1.1209
KDM2A	4	0.001722	0.0061362	0.094866	1221	4	-1.1414	0.99828	0.99827	1	17915	0	-1.1414
MTFMT	4	0.0017226	0.0061388	0.094866	1222	4	-1.5696	0.99828	0.99827	1	17914	0	-1.5696
LSM5	4	0.0017316	0.0061703	0.09522	1223	4	-1.2911	0.99827	0.99826	1	17913	0	-1.2911
C1orf109	4	0.0017325	0.0061719	0.09522	1224	4	-2.1978	0.99827	0.99826	1	17912	0	-2.1978
LIAS	4	0.0017711	0.0063103	0.097276	1225	3	-1.371	0.82283	0.82279	1	14158	0	-1.371
ECM1	4	0.0017775	0.0063334	0.097552	1226	4	-0.78925	0.99822	0.99822	1	17909	0	-0.78925
MRPL46	4	0.0018041	0.0064073	0.09861	1227	3	-1.6096	0.91584	0.91589	1	15763	0	-1.6096
TSFM	4	0.0018187	0.006455	0.099264	1228	4	-0.88476	0.99818	0.99818	1	17906	0	-0.88476
RIMBP3C	4	0.0018203	0.0064618	0.099288	1229	3	-1.0751	0.92845	0.92858	1	16003	0	-1.0751
GEMIN4	4	0.0018249	0.0064796	0.099456	1230	3	-1.2641	0.96275	0.96275	1	16679	0	-1.2641
MED19	4	0.0018258	0.0064833	0.099456	1231	3	-2.1284	0.50459	0.61455	1	10781	1	-2.1284
ST20-MTHFS	4	0.001827	0.0064906	0.099488	1232	1	-0.063199	0.3099	0.45217	1	8252	1	-0.063199
TAF1	4	0.0018339	0.0065148	0.099777	1233	4	-2.7892	0.99212	0.99213	1	17507	0	-2.7892
ATP6V1H	4	0.0018385	0.0065363	0.100025	1234	3	-1.709	0.72536	0.74044	1	12751	1	-1.709
PLA2G10	4	0.0018424	0.0065507	0.100164	1235	3	-1.9554	0.8902	0.89016	1	15314	0	-1.9554
HNRNPA2B1	4	0.0018585	0.0066149	0.1009	1236	3	-1.3426	0.6956	0.71982	1	12417	1	-1.3426
EXOSC10	4	0.0018606	0.0066191	0.1009	1237	4	-1.5654	0.99814	0.99813	1	17904	0	-1.5654
BANF1	4	0.0018615	0.0066201	0.1009	1238	2	-1.206	0.13456	0.27044	0.935659	5456	1	-1.206
DIMT1	4	0.0018615	0.0066201	0.1009	1239	4	-1.434	0.99814	0.99813	1	17903	0	-1.434
IDH3B	4	0.0018768	0.0066747	0.101575	1240	4	-0.69948	0.99812	0.99812	1	17902	0	-0.69948
SLU7	4	0.0018769	0.0066752	0.101575	1241	3	-2.0125	0.011634	0.038553	0.635838	1143	1	-2.0125
POLR1D	4	0.0018871	0.0067171	0.102131	1242	4	-1.1605	0.99811	0.99811	1	17900	0	-1.1605
MRPL30	4	0.0018911	0.0067334	0.102245	1243	4	-0.73271	0.99811	0.9981	1	17899	0	-0.73271
GINS3	4	0.0018916	0.0067355	0.102245	1244	3	-1.9082	0.87474	0.87469	1	15034	0	-1.9082
RPL37A	4	0.0018969	0.0067559	0.102473	1245	4	-1.6222	0.9981	0.9981	1	17898	0	-1.6222
NDOR1	4	0.0019066	0.0067895	0.1029	1246	4	-0.8845	0.99809	0.99809	1	17897	0	-0.8845
HIST1H2AK	4	0.0019083	0.0067995	0.102968	1247	2	-0.79137	0.10938	0.23153	0.909946	4805	2	-0.79137
FANCF	4	0.0019126	0.0068152	0.103123	1248	4	-1.2235	0.99809	0.99808	1	17896	0	-1.2235
SHARPIN	4	0.001927	0.0068634	0.103687	1249	4	-1.0624	0.99807	0.99807	1	17894	0	-1.0624
TTC14	4	0.001927	0.0068634	0.103687	1250	3	-0.96411	0.87403	0.87398	1	15019	0	-0.96411
TFRC	4	0.0019304	0.0068729	0.103747	1251	4	-1.6361	0.99807	0.99807	1	17893	0	-1.6361
SMG6	4	0.0019338	0.006886	0.103862	1252	4	-0.9085	0.99807	0.99806	1	17892	0	-0.9085
USP37	4	0.0019373	0.0068954	0.103921	1253	3	-1.0921	0.65814	0.69599	1	12066	1	-1.0921
U2SURP	4	0.0019449	0.006918	0.104178	1254	3	-1.0021	0.69045	0.71644	1	12369	1	-1.0021
PAK1IP1	4	0.0019647	0.0069898	0.105155	1255	4	-2.136	0.99252	0.99254	1	17523	0	-2.136
URB1	4	0.0019657	0.006994	0.105155	1256	4	-1.5881	0.99557	0.99555	1	17670	0	-1.5881
ZNF623	4	0.0019685	0.0070045	0.105229	1257	4	-1.3136	0.99803	0.99802	1	17891	0	-1.3136
URI1	4	0.0019724	0.007016	0.10524	1258	4	-1.6663	0.98874	0.98874	1	17380	0	-1.6663
ALG11	4	0.0019742	0.0070212	0.10524	1259	4	-1.8544	0.99803	0.99802	1	17890	0	-1.8544
HIST1H2BC	4	0.0019761	0.007027	0.10524	1260	3	-1.6398	0.97095	0.97102	1	16882	0	-1.6398
DPH2	4	0.0019762	0.0070275	0.10524	1261	4	-0.87697	0.99802	0.99802	1	17889	0	-0.87697
YAE1D1	4	0.001978	0.0070354	0.105275	1262	4	-1.7519	0.99256	0.99259	1	17526	0	-1.7519
PAICS	4	0.0019818	0.0070522	0.10539	1263	3	-2.0261	0.9743	0.97443	1	16952	0	-2.0261
SPCS2	4	0.0019821	0.0070543	0.10539	1264	4	-1.5005	0.99802	0.99801	1	17888	0	-1.5005
GLMP	4	0.0019904	0.0070842	0.105753	1265	3	-1.281	0.85544	0.85533	1	14694	0	-1.281
CDC27	4	0.0019943	0.0070988	0.105888	1266	3	-1.6628	0.97036	0.9704	1	16869	0	-1.6628
TAF1A	4	0.0019971	0.0071083	0.105893	1267	3	-1.4873	0.95091	0.95095	1	16444	0	-1.4873
TTK	4	0.0019978	0.0071104	0.105893	1268	3	-2.0568	0.96952	0.96954	1	16843	0	-2.0568
DENND3	4	0.0020029	0.0071287	0.106083	1269	3	-1.4355	0.96989	0.9699	1	16857	0	-1.4355
SUPT16H	4	0.0020067	0.0071408	0.106178	1270	4	-1.8659	0.99331	0.99334	1	17552	0	-1.8659
ATP6V1D	4	0.0020134	0.0071733	0.106578	1271	4	-1.3828	0.99799	0.99798	1	17887	0	-1.3828
TRAPPC4	4	0.0020251	0.0072105	0.107047	1272	4	-2.0429	0.99586	0.99584	1	17695	0	-2.0429
CINP	4	0.0020377	0.0072619	0.107664	1273	4	-1.2741	0.98905	0.98905	1	17387	0	-1.2741
TINF2	4	0.0020386	0.0072635	0.107664	1274	4	-2.059	0.99464	0.99466	1	17626	0	-2.059
KAT8	4	0.0020491	0.0073044	0.108185	1275	3	-1.849	0.57305	0.64785	1	11285	1	-1.849
NIPAL2	4	0.0020594	0.0073395	0.10862	1276	4	-0.76814	0.99794	0.99794	1	17886	0	-0.76814
RPL4	4	0.0020621	0.0073526	0.108729	1277	3	-1.7668	0.98581	0.98578	1	17286	0	-1.7668
DDX28	4	0.0020738	0.007394	0.109256	1278	4	-1.5806	0.99377	0.99379	1	17581	0	-1.5806
FANCE	4	0.0020817	0.0074192	0.109542	1279	3	-0.90523	0.079818	0.17806	0.880489	3815	1	-0.90523
ELL	4	0.0020856	0.0074354	0.109696	1280	4	-1.1272	0.99791	0.99791	1	17885	0	-1.1272
DHFRL1	4	0.0020916	0.0074585	0.10995	1281	3	-0.56475	0.6279	0.67804	1	11766	1	-0.56475
TMEM79	4	0.0020939	0.0074643	0.10995	1282	4	-0.88898	0.99791	0.9979	1	17884	0	-0.88898
TSPYL5	4	0.002097	0.0074805	0.110103	1283	4	-0.56667	0.9979	0.9979	1	17883	0	-0.56667
AGAP9	4	0.0020991	0.0074889	0.110141	1284	4	-1.3209	0.9979	0.99789	1	17882	0	-1.3209
METTL13	4	0.002108	0.0075178	0.110479	1285	4	-0.46653	0.99789	0.99789	1	17881	0	-0.46653
DDX42	4	0.0021114	0.0075324	0.110609	1286	3	-1.9163	0.96281	0.96281	1	16682	0	-1.9163
C1orf131	4	0.0021183	0.0075571	0.110884	1287	3	-1.5668	0.94513	0.94512	1	16325	0	-1.5668
CCDC86	4	0.0021263	0.0075906	0.11129	1288	4	-0.95609	0.99787	0.99787	1	17879	0	-0.95609
TNR	4	0.00213	0.0076048	0.111308	1289	4	-0.60706	0.99787	0.99787	1	17878	0	-0.60706
POLR1A	4	0.0021313	0.0076069	0.111308	1290	3	-1.7961	0.9433	0.94338	1	16284	0	-1.7961
DCAF13	4	0.0021333	0.0076095	0.111308	1291	3	-1.5263	0.97546	0.97561	1	16990	0	-1.5263
METTL15	4	0.0021386	0.0076331	0.111522	1292	4	-0.76719	0.99786	0.99786	1	17877	0	-0.76719
ISY1-RAB43	4	0.0021393	0.0076373	0.111522	1293	4	-2.1887	0.99179	0.99181	1	17495	0	-2.1887
MRPL3	4	0.0021403	0.007642	0.111522	1294	3	-2.0263	0.41059	0.55639	1	9855	1	-2.0263
EHMT2	4	0.0021415	0.0076478	0.111522	1295	4	-0.82297	0.99786	0.99785	1	17876	0	-0.82297
SUPT6H	4	0.0021495	0.0076777	0.1118	1296	4	-1.5567	0.99785	0.99784	1	17875	0	-1.5567
TRMT61A	4	0.0021504	0.0076787	0.1118	1297	3	-1.9793	0.82818	0.82813	1	14246	0	-1.9793
COX4I1	4	0.0021622	0.0077233	0.112363	1298	4	-1.2351	0.99784	0.99784	1	17874	0	-1.2351
CSNK2A1	4	0.0021638	0.0077296	0.112367	1299	4	-0.70185	0.99784	0.99783	1	17873	0	-0.70185
GPKOW	4	0.0021868	0.0078087	0.113431	1300	3	-1.2512	0.9002	0.90014	1	15482	0	-1.2512
WDR61	4	0.0021888	0.0078156	0.113443	1301	3	-1.0224	0.33993	0.48327	1	8741	1	-1.0224
CDC5L	4	0.0021926	0.0078329	0.113607	1302	4	-0.74988	0.99781	0.99781	1	17871	0	-0.74988
NOL8	4	0.0022039	0.0078696	0.114051	1303	4	-1.2016	0.9978	0.9978	1	17870	0	-1.2016
MRPL39	4	0.0022092	0.0078863	0.114207	1304	3	-1.5851	0.34074	0.48411	1	8753	1	-1.5851
NIP7	4	0.0022131	0.0079042	0.114328	1305	4	-1.1895	0.99779	0.99779	1	17868	0	-1.1895
MTIF3	4	0.0022137	0.0079068	0.114328	1306	4	-1.1538	0.99779	0.99779	1	17867	0	-1.1538
NSUN3	4	0.0022205	0.0079393	0.11471	1307	3	-1.1438	0.032117	0.085039	0.770204	2083	1	-1.1438
SMC6	4	0.0022329	0.0079839	0.115266	1308	4	-1.6602	0.99733	0.99732	1	17807	0	-1.6602
GRAP	4	0.0022438	0.0080206	0.115707	1309	4	-0.78838	0.99776	0.99776	1	17866	0	-0.78838
MCMBP	4	0.0022457	0.0080284	0.115719	1310	4	-1.2875	0.99775	0.99776	1	17865	0	-1.2875
DDX49	4	0.0022471	0.0080337	0.115719	1311	4	-1.093	0.99775	0.99776	1	17864	0	-1.093
LRRC24	4	0.0022567	0.0080667	0.116106	1312	4	-0.75123	0.99774	0.99775	1	17863	0	-0.75123
OR4F16	4	0.0022594	0.0080751	0.116139	1313	4	-1.4806	0.99774	0.99775	1	17862	0	-1.4806
THOC1	4	0.0022638	0.0080929	0.116218	1314	4	-1.0957	0.99774	0.99774	1	17861	0	-1.0957
THG1L	4	0.0022639	0.0080929	0.116218	1315	3	-1.3978	0.37286	0.51734	1	9253	1	-1.3978
COPS4	4	0.0022682	0.0081055	0.116284	1316	4	-1.7846	0.99773	0.99774	1	17860	0	-1.7846
MRPL19	4	0.0022712	0.0081149	0.116284	1317	4	-1.3722	0.99465	0.99467	1	17628	0	-1.3722
RPL15	4	0.0022715	0.008116	0.116284	1318	4	-0.5773	0.99773	0.99773	1	17859	0	-0.5773
NABP2	4	0.002276	0.0081317	0.116421	1319	4	-0.97727	0.99772	0.99773	1	17858	0	-0.97727
ARID1A	4	0.0022812	0.0081501	0.116595	1320	4	-0.69587	0.99772	0.99772	1	17857	0	-0.69587
CGB1	4	0.0022892	0.0081794	0.116927	1321	4	-0.96692	0.99771	0.99771	1	17855	0	-0.96692
CDC45	4	0.0023177	0.0082796	0.118224	1322	4	-1.4984	0.99768	0.99768	1	17852	0	-1.4984
TNFAIP8L2-SCNM1	4	0.0023182	0.0082827	0.118224	1323	4	-1.2726	0.99768	0.99768	1	17851	0	-1.2726
MED10	4	0.0023248	0.008311	0.118539	1324	4	-1.0746	0.99674	0.99677	1	17762	0	-1.0746
TIPIN	4	0.0023356	0.0083414	0.118838	1325	4	-1.2727	0.99766	0.99766	1	17849	0	-1.2727
RRS1	4	0.0023365	0.0083446	0.118838	1326	4	-2.4797	0.98845	0.98847	1	17373	0	-2.4797
EIF3H	4	0.0023453	0.0083729	0.119151	1327	3	-1.2126	0.94203	0.94208	1	16252	0	-1.2126
LRRC57	4	0.0023514	0.0083954	0.11933	1328	4	-0.53066	0.99765	0.99764	1	17847	0	-0.53066
DHX36	4	0.0023523	0.0083981	0.11933	1329	4	-0.57624	0.99765	0.99764	1	17846	0	-0.57624
ARL17A	4	0.0023674	0.0084484	0.119931	1330	3	-1.763	0.965	0.96502	1	16744	0	-1.763
NUP98	4	0.0023698	0.0084531	0.119931	1331	3	-1.423	0.97745	0.97762	1	17043	0	-1.423
NAPRT	4	0.0023758	0.0084751	0.120154	1332	4	-1.1693	0.99762	0.99761	1	17845	0	-1.1693
EXOSC3	4	0.0023813	0.008494	0.120331	1333	3	-1.8732	0.38347	0.52822	1	9432	1	-1.8732
PRPF4	4	0.002389	0.0085229	0.120649	1334	4	-1.2672	0.99761	0.9976	1	17844	0	-1.2672
STRIP1	4	0.0023976	0.0085491	0.120929	1335	4	-0.67975	0.9976	0.99759	1	17842	0	-0.67975
TGM5	4	0.0024154	0.0086052	0.121632	1336	4	-1.1529	0.99758	0.99757	1	17841	0	-1.1529
NPIPB9	4	0.0024212	0.0086261	0.121837	1337	4	-1.3417	0.99758	0.99756	1	17840	0	-1.3417
SNW1	4	0.0024246	0.0086387	0.121924	1338	4	-1.3163	0.98793	0.98795	1	17358	0	-1.3163
ILF2	4	0.0024311	0.0086628	0.122133	1339	4	-1.096	0.99757	0.99755	1	17839	0	-1.096
PISD	4	0.0024322	0.0086665	0.122133	1340	4	-1.7744	0.99716	0.99716	1	17790	0	-1.7744
MTHFD2	4	0.0024433	0.0087056	0.122592	1341	4	-0.57198	0.99756	0.99754	1	17838	0	-0.57198
BRPF1	4	0.0024574	0.0087614	0.123287	1342	3	-1.0281	0.37159	0.51603	1	9238	1	-1.0281
SURF6	4	0.0024602	0.0087682	0.123291	1343	4	-1.5752	0.99754	0.99753	1	17837	0	-1.5752
OR4F3	4	0.0024723	0.0088034	0.123692	1344	3	-1.0925	0.97935	0.97946	1	17095	0	-1.0925
IPO7	4	0.0024755	0.0088117	0.123718	1345	3	-1.0436	0.98116	0.98117	1	17147	0	-1.0436
NUP93	4	0.0024904	0.0088726	0.12448	1346	3	-1.2774	0.88399	0.88398	1	15198	0	-1.2774
MST1L	4	0.0024967	0.0088909	0.124567	1347	4	-0.78033	0.9975	0.99749	1	17836	0	-0.78033
TOP1MT	4	0.0024975	0.008892	0.124567	1348	3	-1.8256	0.90177	0.90174	1	15513	0	-1.8256
BUB1B	4	0.0025115	0.0089339	0.124964	1349	4	-1.1236	0.99749	0.99748	1	17833	0	-1.1236
LSM12	4	0.0025127	0.008935	0.124964	1350	4	-1.2342	0.99749	0.99747	1	17832	0	-1.2342
DNAJA1	4	0.0025145	0.0089402	0.124964	1351	4	-0.77688	0.99749	0.99747	1	17831	0	-0.77688
FAM60A	4	0.0025175	0.0089491	0.124996	1352	4	-1.0745	0.99748	0.99747	1	17830	0	-1.0745
CLCN2	4	0.0025205	0.0089601	0.125058	1353	4	-0.87399	0.99748	0.99747	1	17829	0	-0.87399
COQ10A	4	0.0025435	0.0090367	0.12594	1354	4	-1.2395	0.99746	0.99744	1	17826	0	-1.2395
OR4F21	4	0.0025435	0.0090367	0.12594	1355	4	-1.85	0.99746	0.99744	1	17828	0	-1.85
GTPBP3	4	0.0025492	0.0090545	0.126095	1356	4	-0.45195	0.99745	0.99744	1	17824	0	-0.45195
NPIPA3	4	0.0025625	0.009098	0.126608	1357	4	-0.63664	0.99744	0.99743	1	17823	0	-0.63664
MED30	4	0.0025661	0.0091116	0.126704	1358	4	-0.96883	0.99743	0.99742	1	17822	0	-0.96883
ALG14	4	0.0025732	0.0091274	0.12671	1359	4	-0.73036	0.99233	0.99235	1	17517	0	-0.73036
LOC100144595	4	0.0025738	0.0091295	0.12671	1360	2	-1.3856	0.60721	0.66633	1	11583	1	-1.3856
THOC6	4	0.0025766	0.0091384	0.12671	1361	3	-0.78657	0.93845	0.93846	1	16187	0	-0.78657
GTF3C5	4	0.002577	0.0091389	0.12671	1362	4	-1.3027	0.9923	0.99232	1	17515	0	-1.3027
COQ6	4	0.0025857	0.0091677	0.127017	1363	4	-0.78872	0.99683	0.99686	1	17767	0	-0.78872
TAMM41	4	0.0025902	0.0091866	0.127185	1364	3	-1.3129	0.79995	0.80086	1	13796	1	-1.3129
GMNN	4	0.0025925	0.0091966	0.12723	1365	3	-1.5546	0.97662	0.97678	1	17021	0	-1.5546
PKMYT1	4	0.0026111	0.0092695	0.128144	1366	4	-0.90636	0.99739	0.99738	1	17817	0	-0.90636
PPP1R10	4	0.0026172	0.0092915	0.128354	1367	4	-1.4283	0.99738	0.99738	1	17816	0	-1.4283
POLR2J3	4	0.0026285	0.0093266	0.128745	1368	2	-1.2039	0.9265	0.92664	1	15972	0	-1.2039
TBC1D31	4	0.002632	0.0093361	0.128782	1369	4	-0.72481	0.99737	0.99736	1	17815	0	-0.72481
MRPL52	4	0.002635	0.009345	0.12881	1370	4	-1.681	0.99736	0.99736	1	17814	0	-1.681
CHP1	4	0.0026412	0.0093691	0.129012	1371	4	-1.2245	0.99736	0.99735	1	17813	0	-1.2245
NBAS	4	0.0026439	0.0093733	0.129012	1372	3	-1.5393	0.98551	0.98549	1	17273	0	-1.5393
RASA4	4	0.0026492	0.0093901	0.129091	1373	4	-1.106	0.99735	0.99735	1	17811	0	-1.106
NSF	4	0.0026511	0.0093958	0.129091	1374	2	-0.91282	0.4346	0.5812	1	10258	1	-0.91282
CADM4	4	0.0026536	0.0093995	0.129091	1375	4	-0.48631	0.99735	0.99734	1	17810	0	-0.48631
TUBE1	4	0.0026604	0.0094241	0.129155	1376	4	-0.41488	0.99734	0.99733	1	17809	0	-0.41488
NOA1	4	0.002661	0.0094241	0.129155	1377	4	-1.3599	0.99734	0.99733	1	17808	0	-1.3599
CHORDC1	4	0.0026612	0.0094247	0.129155	1378	3	-1.78	0.93939	0.93946	1	16202	0	-1.78
TAF8	4	0.0026772	0.0094742	0.12974	1379	4	-1.1746	0.99099	0.99098	1	17465	0	-1.1746
POLD1	4	0.0026897	0.0095143	0.130113	1380	4	-1.7464	0.99731	0.99731	1	17806	0	-1.7464
BAG6	4	0.0026903	0.0095169	0.130113	1381	4	-0.57011	0.99731	0.9973	1	17805	0	-0.57011
EFNA3	4	0.0026909	0.0095222	0.130113	1382	4	-0.62511	0.99731	0.9973	1	17804	0	-0.62511
KIF23	4	0.0026991	0.0095489	0.130385	1383	4	-1.2361	0.9973	0.99729	1	17803	0	-1.2361
POTEJ	4	0.0027243	0.0096365	0.131485	1384	4	-0.60962	0.99728	0.99727	1	17800	0	-0.60962
WNK1	4	0.0027265	0.0096438	0.13149	1385	3	-1.7839	0.77283	0.77711	1	13370	1	-1.7839
NFKBIB	4	0.0027401	0.0096926	0.13206	1386	4	-0.6812	0.99726	0.99725	1	17798	0	-0.6812
CPSF2	4	0.0027522	0.0097398	0.132607	1387	4	-1.7738	0.99725	0.99724	1	17796	0	-1.7738
HIST1H2BL	4	0.002756	0.0097539	0.132704	1388	4	-1.6149	0.99724	0.99724	1	17795	0	-1.6149
AARS2	4	0.0027772	0.0098289	0.133628	1389	4	-1.7718	0.99111	0.99111	1	17467	0	-1.7718
PGLS	4	0.002779	0.0098368	0.133638	1390	4	-1.0197	0.99722	0.99722	1	17794	0	-1.0197
NR2C2AP	4	0.0027856	0.0098583	0.133834	1391	4	-1.4072	0.9959	0.99588	1	17700	0	-1.4072
HDAC3	4	0.0027927	0.0098813	0.134051	1392	4	-1.2879	0.99707	0.99708	1	17787	0	-1.2879
GPS1	4	0.0027987	0.0099028	0.134246	1393	3	-1.6783	0.92411	0.92422	1	15912	0	-1.6783
MRPL23	4	0.002813	0.0099532	0.134819	1394	3	-1.5685	0.80405	0.80465	1	13863	1	-1.5685
EIF4B	4	0.0028184	0.0099726	0.134819	1395	4	-0.73814	0.99718	0.99719	1	17792	0	-0.73814
MED18	4	0.0028192	0.0099736	0.134819	1396	4	-0.97567	0.99191	0.99193	1	17499	0	-0.97567
KDSR	4	0.0028193	0.0099736	0.134819	1397	4	-0.70914	0.99718	0.99719	1	17791	0	-0.70914
ATP5J2-PTCD1	4	0.0028383	0.01004	0.13556	1398	4	-1.5218	0.9912	0.99121	1	17471	0	-1.5218
OSGEP	4	0.0028394	0.010043	0.13556	1399	3	-1.3502	0.59841	0.66148	1	11501	1	-1.3502
PSMC1	4	0.0028479	0.010072	0.135859	1400	4	-1.4741	0.99334	0.99337	1	17554	0	-1.4741
GLTSCR2	4	0.0028552	0.010098	0.136089	1401	4	-1.7836	0.99682	0.99685	1	17766	0	-1.7836
POM121C	4	0.0028562	0.010104	0.136089	1402	3	-1.1243	0.027351	0.075229	0.743395	1911	1	-1.1243
SF1	4	0.0028721	0.010159	0.136733	1403	3	-1.2629	0.9148	0.91486	1	15750	0	-1.2629
WDR7	4	0.002877	0.010176	0.136868	1404	3	-1.0053	0.6534	0.6931	1	12016	1	-1.0053
HSPA14	4	0.0028877	0.010214	0.137278	1405	4	-0.82281	0.99711	0.99713	1	17789	0	-0.82281
CHMP4B	4	0.0029013	0.010253	0.137703	1406	4	-1.646	0.9971	0.99711	1	17788	0	-1.646
GTF3A	4	0.0029035	0.01026	0.137703	1407	3	-1.6559	0.9695	0.96953	1	16841	0	-1.6559
RPL32	4	0.0029382	0.010396	0.139426	1408	3	-1.7429	0.62275	0.67509	1	11720	1	-1.7429
RHOA	4	0.0029442	0.010418	0.139629	1409	4	-0.99746	0.99706	0.99708	1	17786	0	-0.99746
ATP5I	4	0.0029493	0.010431	0.139699	1410	3	-1.6253	0.92258	0.92269	1	15883	0	-1.6253
SUPV3L1	4	0.0029513	0.010439	0.139705	1411	4	-1.4755	0.99705	0.99707	1	17785	0	-1.4755
PYROXD1	4	0.0029567	0.010459	0.139873	1412	3	-1.1802	0.979	0.97911	1	17085	0	-1.1802
TSPY3	4	0.0029637	0.01048	0.139976	1413	4	-0.68143	0.99704	0.99706	1	17784	0	-0.68143
HRNR	4	0.0029647	0.010481	0.139976	1414	4	-0.50702	0.99704	0.99706	1	17783	0	-0.50702
NDUFB5	4	0.0029691	0.010497	0.140087	1415	4	-1.0752	0.99703	0.99706	1	17782	0	-1.0752
MED9	4	0.0029836	0.010545	0.140628	1416	4	-0.52382	0.99702	0.99704	1	17781	0	-0.52382
WRB	4	0.002989	0.010567	0.140818	1417	4	-1.0656	0.99053	0.99052	1	17445	0	-1.0656
NAA25	4	0.0030065	0.010632	0.141592	1418	3	-1.4756	0.95423	0.95425	1	16513	0	-1.4756
FTSJ3	4	0.0030111	0.010643	0.141639	1419	4	-1.3049	0.99699	0.99701	1	17780	0	-1.3049
YTHDC1	4	0.0030227	0.010686	0.142104	1420	3	-1.3098	0.92001	0.92011	1	15836	0	-1.3098
TCEB1	4	0.0030341	0.010712	0.142352	1421	3	-1.7332	0.76464	0.77034	1	13248	1	-1.7332
SRRM2	4	0.0030371	0.010722	0.142384	1422	4	-1.0692	0.99696	0.99699	1	17779	0	-1.0692
GATC	4	0.0030416	0.010736	0.142472	1423	3	-2.1853	0.13523	0.27114	0.936021	5469	1	-2.1853
LENG8	4	0.0030567	0.010788	0.143067	1424	4	-1.2606	0.99694	0.99697	1	17778	0	-1.2606
NOL9	4	0.0030632	0.010804	0.143172	1425	4	-1.2501	0.99694	0.99697	1	17777	0	-1.2501
MTERF3	4	0.003068	0.010819	0.143269	1426	4	-0.78456	0.99693	0.99696	1	17776	0	-0.78456
TUBD1	4	0.0030745	0.010841	0.143436	1427	3	-1.6073	0.40684	0.55244	1	9802	1	-1.6073
MCRS1	4	0.0030755	0.010847	0.143436	1428	3	-1.8741	0.96054	0.96056	1	16623	0	-1.8741
TAF10	4	0.003086	0.010886	0.143855	1429	4	-1.4203	0.99691	0.99694	1	17775	0	-1.4203
C1QBP	4	0.0030923	0.01091	0.144073	1430	3	-1.189	0.97677	0.97694	1	17025	0	-1.189
SEPT7	4	0.0031132	0.010982	0.144891	1431	4	-0.96544	0.99689	0.99691	1	17774	0	-0.96544
PFDN6	4	0.0031153	0.010988	0.144891	1432	3	-1.9331	0.40952	0.55523	1	9839	1	-1.9331
TRUB2	4	0.0031167	0.010995	0.144891	1433	4	-0.99674	0.99688	0.99691	1	17773	0	-0.99674
C21orf2	4	0.0031198	0.011006	0.144935	1434	4	-0.49842	0.99688	0.99691	1	17772	0	-0.49842
LPCAT3	4	0.0031251	0.011028	0.145124	1435	4	-0.53429	0.99687	0.9969	1	17771	0	-0.53429
CGB8	4	0.0031358	0.011064	0.145461	1436	3	-1.0313	0.77323	0.77743	1	13374	1	-1.0313
CPSF1	4	0.0031384	0.011074	0.145461	1437	3	-1.6729	0.98182	0.98184	1	17171	0	-1.6729
NUBP2	4	0.0031391	0.011077	0.145461	1438	4	-0.71224	0.99686	0.99689	1	17769	0	-0.71224
CKMT1B	4	0.0031454	0.011104	0.145701	1439	4	-0.46598	0.99685	0.99689	1	17768	0	-0.46598
SPDYE5	4	0.0031494	0.011117	0.145701	1440	3	-0.88629	0.98166	0.98167	1	17162	0	-0.88629
SAFB	4	0.00315	0.011118	0.145701	1441	4	-0.96372	0.99607	0.99606	1	17709	0	-0.96372
COPZ1	4	0.0031551	0.011142	0.145916	1442	3	-1.2388	0.78988	0.79183	1	13639	1	-1.2388
SNRNP27	4	0.003168	0.011192	0.14646	1443	3	-1.5821	0.85657	0.85649	1	14713	0	-1.5821
CLPP	4	0.0031823	0.011247	0.147078	1444	4	-1.4523	0.99547	0.99546	1	17667	0	-1.4523
YIPF3	4	0.0031929	0.01128	0.147415	1445	4	-0.67172	0.99681	0.99684	1	17765	0	-0.67172
RNASEK	4	0.0032309	0.0114	0.148778	1446	2	-0.86878	0.88762	0.88759	1	15267	0	-0.86878
PPP6C	4	0.0032336	0.011406	0.148778	1447	4	-1.3734	0.99677	0.9968	1	17764	0	-1.3734
PABPC1	4	0.0032345	0.011408	0.148778	1448	4	-1.4154	0.98808	0.98809	1	17362	0	-1.4154
BATF	4	0.0032444	0.01145	0.149215	1449	4	-0.60227	0.99676	0.99679	1	17763	0	-0.60227
SASS6	4	0.0032555	0.011498	0.149719	1450	4	-1.2731	0.9965	0.99653	1	17738	0	-1.2731
SMNDC1	4	0.0032581	0.011504	0.149719	1451	3	-1.0618	0.3888	0.53376	1	9514	1	-1.0618
IDH2	4	0.0032661	0.011538	0.149927	1452	4	-0.95608	0.99142	0.99145	1	17482	0	-0.95608
SHMT2	4	0.0032674	0.011542	0.149927	1453	4	-1.0039	0.99371	0.99374	1	17578	0	-1.0039
C8orf33	4	0.0032697	0.011548	0.149927	1454	4	-1.1418	0.99673	0.99676	1	17761	0	-1.1418
DCAF7	4	0.0032712	0.011552	0.149927	1455	4	-0.73063	0.99673	0.99676	1	17760	0	-0.73063
RPS3	4	0.0032859	0.011602	0.15047	1456	3	-1.3701	0.97364	0.97375	1	16935	0	-1.3701
STIM1	4	0.0032901	0.011614	0.150523	1457	4	-0.59842	0.99671	0.99674	1	17759	0	-0.59842
BRI3	4	0.0032981	0.011638	0.150673	1458	4	-0.66819	0.9967	0.99673	1	17758	0	-0.66819
NMNAT1	4	0.0032995	0.011644	0.150673	1459	4	-0.96989	0.9967	0.99673	1	17757	0	-0.96989
COQ10B	4	0.0033018	0.011652	0.150673	1460	4	-1.1998	0.99568	0.99566	1	17679	0	-1.1998
RABL2B	4	0.0033031	0.011657	0.150673	1461	3	-0.90193	0.86234	0.86226	1	14803	0	-0.90193
MBD3L4	4	0.0033281	0.011736	0.151593	1462	4	-1.1357	0.99667	0.9967	1	17756	0	-1.1357
RARG	4	0.0033376	0.011766	0.151875	1463	4	-0.56683	0.99666	0.9967	1	17755	0	-0.56683
CTU2	4	0.0033593	0.011839	0.152618	1464	3	-1.5333	0.98566	0.98564	1	17280	0	-1.5333
LIN52	4	0.0033605	0.011845	0.152618	1465	4	-1.0425	0.99664	0.99667	1	17754	0	-1.0425
SCX	4	0.0033612	0.011848	0.152618	1466	4	-0.47493	0.99664	0.99667	1	17753	0	-0.47493
MECR	4	0.0033647	0.011856	0.152622	1467	4	-1.0072	0.99643	0.99645	1	17732	0	-1.0072
MRPS35	4	0.0033694	0.011868	0.152673	1468	4	-0.89625	0.99663	0.99666	1	17752	0	-0.89625
RSRC2	4	0.0033731	0.011884	0.152708	1469	4	-1.3074	0.99663	0.99666	1	17751	0	-1.3074
DARS2	4	0.0033741	0.011887	0.152708	1470	3	-1.3042	0.26364	0.40449	1	7533	1	-1.3042
BRD9	4	0.0033768	0.011896	0.152711	1471	4	-1.0021	0.99662	0.99666	1	17749	0	-1.0021
TSG101	4	0.0033971	0.011962	0.153462	1472	3	-1.1178	0.98261	0.98263	1	17192	0	-1.1178
NANOGNB	4	0.0034137	0.012019	0.154084	1473	1	0.17327	0.18066	0.3185	0.968453	6209	2	0.17327
POLQ	4	0.0034228	0.012054	0.154378	1474	3	-1.3991	0.94265	0.94271	1	16262	0	-1.3991
CCNF	4	0.0034238	0.012058	0.154378	1475	4	-0.46932	0.99658	0.99661	1	17746	0	-0.46932
UBE2G1	4	0.0034313	0.012082	0.154576	1476	4	-0.57109	0.99657	0.9966	1	17745	0	-0.57109
CGB2	4	0.0034437	0.012125	0.155021	1477	4	-0.87773	0.99656	0.9966	1	17744	0	-0.87773
YEATS4	4	0.0034592	0.012174	0.155539	1478	4	-0.76725	0.99654	0.99658	1	17742	0	-0.76725
ADORA1	4	0.0034645	0.012198	0.155741	1479	4	-0.67036	0.99654	0.99657	1	17741	0	-0.67036
LCE3E	4	0.0034743	0.012234	0.156098	1480	4	-0.60399	0.99653	0.99656	1	17740	0	-0.60399
RPS25	4	0.0034803	0.012253	0.15624	1481	3	-1.9705	0.7778	0.78125	1	13444	1	-1.9705
NCL	4	0.0034873	0.012277	0.156435	1482	4	-0.91715	0.99651	0.99655	1	17739	0	-0.91715
GIGYF2	4	0.0034913	0.012289	0.15649	1483	3	-0.95346	0.78877	0.79084	1	13623	1	-0.95346
FAM72C	4	0.0035071	0.012343	0.157065	1484	4	-1.3013	0.99649	0.99653	1	17737	0	-1.3013
FAM57B	4	0.003512	0.01236	0.157179	1485	4	-0.64436	0.99649	0.99652	1	17736	0	-0.64436
CMPK1	4	0.0035247	0.012399	0.157566	1486	4	-1.1876	0.99648	0.99651	1	17735	0	-1.1876
TWISTNB	4	0.003537	0.012437	0.157946	1487	3	-1.6833	0.41723	0.56323	1	9964	1	-1.6833
RAD50	4	0.0035431	0.012454	0.158053	1488	4	-0.78268	0.99646	0.99648	1	17734	0	-0.78268
URB2	4	0.0035868	0.012598	0.159776	1489	4	-0.73555	0.99641	0.99643	1	17731	0	-0.73555
PIM2	4	0.0036125	0.012688	0.160811	1490	4	-1.177	0.98791	0.98793	1	17357	0	-1.177
PIAS4	4	0.0036535	0.012833	0.162536	1491	3	-0.77217	0.32687	0.46968	1	8517	1	-0.77217
VPS25	4	0.0036592	0.012848	0.16262	1492	4	-1.6913	0.98715	0.98712	1	17328	0	-1.6913
UBE2W	4	0.003671	0.01289	0.163041	1493	4	-0.98339	0.99633	0.99635	1	17730	0	-0.98339
SUMF2	4	0.0036746	0.012903	0.163091	1494	4	-0.72251	0.99633	0.99634	1	17729	0	-0.72251
ANAPC4	4	0.0037059	0.013006	0.164287	1495	4	-0.6091	0.99629	0.99631	1	17728	0	-0.6091
MRPL38	4	0.0037106	0.013022	0.164376	1496	3	-1.813	0.69122	0.71694	1	12378	1	-1.813
EXOSC1	4	0.0037131	0.013031	0.164385	1497	4	-0.75006	0.99629	0.9963	1	17726	0	-0.75006
ELP3	4	0.0037154	0.013042	0.164407	1498	3	-2.363	0.97514	0.97528	1	16978	0	-2.363
NDUFB9	4	0.003729	0.013081	0.164786	1499	4	-1.6907	0.99627	0.99629	1	17725	0	-1.6907
RBM15	4	0.003737	0.013108	0.165026	1500	4	-0.55129	0.99626	0.99628	1	17724	0	-0.55129
ZNF384	4	0.0037571	0.013179	0.165649	1501	4	-0.38507	0.99624	0.99626	1	17723	0	-0.38507
NKTR	4	0.0037587	0.013184	0.165649	1502	4	-0.55287	0.99624	0.99625	1	17722	0	-0.55287
CGB5	4	0.0037587	0.013184	0.165649	1503	4	-0.85865	0.99624	0.99625	1	17721	0	-0.85865
AQP7	4	0.0037652	0.013202	0.165649	1504	2	-0.56699	0.21435	0.35349	0.988903	6747	2	-0.56699
NUF2	4	0.0037653	0.013202	0.165649	1505	3	-1.7056	0.95047	0.95052	1	16433	0	-1.7056
C12orf10	4	0.0037697	0.013216	0.165717	1506	3	-0.78392	0.98204	0.98206	1	17180	0	-0.78392
TTC1	4	0.0037755	0.013242	0.165929	1507	3	-1.2411	0.91937	0.91944	1	15831	0	-1.2411
MSTO1	4	0.0037914	0.013287	0.16639	1508	4	-1.5957	0.99621	0.99622	1	17720	0	-1.5957
SMG1	4	0.0038024	0.01332	0.166693	1509	4	-0.95563	0.9962	0.9962	1	17719	0	-0.95563
TUBG1	4	0.0038147	0.01336	0.167074	1510	3	-1.6756	0.98081	0.98084	1	17136	0	-1.6756
ATP7A	4	0.0038513	0.013486	0.168543	1511	4	-0.39525	0.99615	0.99615	1	17717	0	-0.39525
FURIN	4	0.0038578	0.013504	0.168661	1512	4	-0.67828	0.99614	0.99615	1	17715	0	-0.67828
OR2T2	4	0.003866	0.013527	0.168837	1513	3	-0.89802	0.87203	0.87197	1	14980	0	-0.89802
MRPS11	4	0.0038815	0.013577	0.16934	1514	3	-0.82362	0.73738	0.7491	1	12898	1	-0.82362
HSD17B12	4	0.0038837	0.013586	0.16934	1515	4	-0.56878	0.99612	0.99612	1	17713	0	-0.56878
STRN4	4	0.0038916	0.013612	0.169554	1516	4	-0.61409	0.99611	0.9961	1	17712	0	-0.61409
TFB2M	4	0.0039104	0.013667	0.170135	1517	4	-1.13	0.99482	0.99483	1	17638	0	-1.13
GOLGA6A	4	0.0039148	0.013683	0.170212	1518	4	-1.8117	0.99039	0.99038	1	17438	0	-1.8117
TPD52	4	0.0039237	0.013711	0.170452	1519	3	-0.64523	0.33029	0.47325	1	8570	1	-0.64523
NIFK	4	0.0039297	0.01373	0.17058	1520	3	-1.1375	0.73079	0.74433	1	12819	1	-1.1375
ARID2	4	0.0039489	0.013794	0.171256	1521	4	-0.95307	0.99605	0.99604	1	17708	0	-0.95307
PPME1	4	0.003953	0.013806	0.171293	1522	4	-0.96959	0.99605	0.99603	1	17707	0	-0.96959
ANKRD20A4	4	0.003956	0.013819	0.171343	1523	2	-0.78236	0.11602	0.24323	0.913728	5026	1	-0.78236
POLR2G	4	0.003964	0.013849	0.171601	1524	3	-1.1757	0.9512	0.95124	1	16450	0	-1.1757
DDX24	4	0.0039865	0.013939	0.172498	1525	3	-1.2425	0.89295	0.89286	1	15364	0	-1.2425
PSMD13	4	0.0039895	0.013949	0.172499	1526	3	-1.2693	0.92573	0.92586	1	15954	0	-1.2693
AASDHPPT	4	0.0039916	0.013958	0.172499	1527	3	-1.3695	0.59771	0.66109	1	11494	1	-1.3695
POLR1B	4	0.0040042	0.014003	0.172944	1528	4	-1.3193	0.996	0.99598	1	17705	0	-1.3193
KRTAP2-2	4	0.0040161	0.014048	0.173319	1529	4	-0.68645	0.99598	0.99597	1	17704	0	-0.68645
POLR3D	4	0.0040169	0.014052	0.173319	1530	4	-1.0518	0.99598	0.99597	1	17703	0	-1.0518
TRMT10C	4	0.0040271	0.014087	0.173623	1531	3	-1.2719	0.06977	0.15908	0.868743	3456	1	-1.2719
YWHAZ	4	0.0040302	0.014095	0.173623	1532	3	-1.0207	0.92147	0.92158	1	15866	0	-1.0207
COL26A1	4	0.0040406	0.014127	0.17391	1533	4	-0.46539	0.99596	0.99594	1	17702	0	-0.46539
C1orf56	4	0.004067	0.014218	0.174919	1534	4	-0.72728	0.99593	0.99591	1	17701	0	-0.72728
HAUS8	4	0.0040787	0.014253	0.17523	1535	4	-1.7547	0.99141	0.99145	1	17481	0	-1.7547
PPP1CB	4	0.0041039	0.014343	0.176218	1536	4	-1.0872	0.9959	0.99588	1	17699	0	-1.0872
GLRX3	4	0.0041168	0.014385	0.176618	1537	4	-0.95245	0.99588	0.99586	1	17697	0	-0.95245
COA5	4	0.0041254	0.014418	0.176909	1538	4	-1.2223	0.99587	0.99586	1	17696	0	-1.2223
DBR1	4	0.00414	0.014468	0.177411	1539	3	-1.7805	0.9455	0.9455	1	16333	0	-1.7805
USP17L2	4	0.0041444	0.014481	0.177456	1540	4	-0.66247	0.99586	0.99583	1	17694	0	-0.66247
NUDCD3	4	0.0041492	0.014496	0.177521	1541	3	-1.4719	0.73726	0.749	1	12894	1	-1.4719
THEM6	4	0.0041669	0.014545	0.177933	1542	4	-0.82563	0.99583	0.99581	1	17693	0	-0.82563
BOLA3	4	0.0041704	0.014554	0.177933	1543	4	-1.3339	0.99583	0.99581	1	17692	0	-1.3339
MT2A	4	0.0041722	0.014558	0.177933	1544	4	-0.51646	0.99583	0.99581	1	17691	0	-0.51646
MRPL43	4	0.004177	0.014573	0.177933	1545	3	-1.4248	0.93574	0.93578	1	16136	0	-1.4248
NCDN	4	0.0041774	0.014576	0.177933	1546	4	-0.71243	0.99582	0.9958	1	17690	0	-0.71243
LSM8	4	0.0041887	0.014618	0.178323	1547	4	-1.2348	0.99581	0.99579	1	17689	0	-1.2348
NUDT21	4	0.0042009	0.014664	0.178764	1548	4	-1.3131	0.9958	0.99578	1	17687	0	-1.3131
RAB5B	4	0.0042283	0.014756	0.17978	1549	3	-1.1286	0.85623	0.85614	1	14707	0	-1.1286
SPRR2A	4	0.0042528	0.014839	0.180575	1550	3	-1.0913	0.97302	0.97313	1	16919	0	-1.0913
CPQ	4	0.0042533	0.014841	0.180575	1551	3	-0.76653	0.085481	0.1886	0.885504	4017	1	-0.76653
XRCC3	4	0.004269	0.014893	0.181069	1552	3	-1.7965	0.95884	0.95886	1	16593	0	-1.7965
WDR74	4	0.0042721	0.014901	0.181069	1553	3	-1.636	0.98125	0.98126	1	17149	0	-1.636
CT45A3	4	0.0042863	0.014952	0.181398	1554	3	-1.0747	0.60198	0.66345	1	11530	1	-1.0747
ADRM1	4	0.0042878	0.014958	0.181398	1555	3	-0.67602	0.83497	0.83494	1	14355	0	-0.67602
KIAA0100	4	0.0042891	0.014959	0.181398	1556	4	-0.67171	0.99571	0.99569	1	17685	0	-0.67171
ARHGAP30	4	0.0042917	0.014966	0.181398	1557	4	-0.61821	0.99571	0.99569	1	17684	0	-0.61821
ACAD9	4	0.0042953	0.01498	0.181454	1558	4	-0.79053	0.9957	0.99568	1	17683	0	-0.79053
RECQL4	4	0.0043115	0.015028	0.181834	1559	4	-0.89183	0.99287	0.9929	1	17537	0	-0.89183
IPO9	4	0.0043149	0.015038	0.181834	1560	4	-0.90585	0.99569	0.99566	1	17681	0	-0.90585
MFSD5	4	0.0043158	0.01504	0.181834	1561	4	-0.99512	0.99568	0.99566	1	17680	0	-0.99512
SCO1	4	0.004322	0.015064	0.181893	1562	4	-1.6915	0.99568	0.99566	1	17678	0	-1.6915
SETD8	4	0.0043224	0.015065	0.181893	1563	3	-1.4604	0.93685	0.9369	1	16155	0	-1.4604
DNAJB13	4	0.0043381	0.015124	0.18236	1564	4	-0.775	0.99566	0.99564	1	17677	0	-0.775
CHRAC1	4	0.0043384	0.015125	0.18236	1565	3	-1.4598	0.94993	0.94997	1	16426	0	-1.4598
IFITM2	4	0.0043408	0.015132	0.18236	1566	4	-0.36138	0.99566	0.99564	1	17676	0	-0.36138
ORC3	4	0.0043559	0.01518	0.182815	1567	4	-1.4203	0.98783	0.98784	1	17356	0	-1.4203
BCAS2	4	0.0043597	0.015192	0.182815	1568	4	-0.94581	0.99564	0.99562	1	17674	0	-0.94581
RIC1	4	0.0043638	0.015207	0.182815	1569	3	-1.376	0.88057	0.88056	1	15131	0	-1.376
RPL14	4	0.0043648	0.015209	0.182815	1570	3	-1.4818	0.70799	0.72813	1	12562	1	-1.4818
FAM63A	4	0.0043798	0.015251	0.183203	1571	3	-1.1136	0.96141	0.96138	1	16652	0	-1.1136
SON	4	0.0043876	0.015276	0.183395	1572	4	-0.79712	0.99561	0.99559	1	17673	0	-0.79712
MON2	4	0.004403	0.015327	0.183889	1573	4	-0.51123	0.9956	0.99558	1	17671	0	-0.51123
FAM72A	4	0.0044175	0.015362	0.184076	1574	3	-1.5277	0.24608	0.38623	1	7257	1	-1.5277
OGDH	4	0.0044176	0.015362	0.184076	1575	3	-0.75523	0.77537	0.77921	1	13411	1	-0.75523
SLC25A19	4	0.0044695	0.015543	0.18602	1576	4	-0.7321	0.99553	0.99551	1	17669	0	-0.7321
RPLP1	4	0.0044697	0.015544	0.18602	1577	3	-1.2217	0.80822	0.80851	1	13925	1	-1.2217
KRR1	4	0.00448	0.015578	0.186307	1578	3	-0.84387	0.53518	0.62891	1	11000	1	-0.84387
ACTL6A	4	0.0044887	0.01561	0.186557	1579	4	-0.72556	0.99551	0.9955	1	17668	0	-0.72556
GATB	4	0.0044924	0.01562	0.186557	1580	3	-1.2434	0.96318	0.9632	1	16692	0	-1.2434
NDUFAF6	4	0.004494	0.015629	0.186557	1581	3	-0.75619	0.94018	0.94023	1	16224	0	-0.75619
TRNT1	4	0.0045119	0.015694	0.187215	1582	3	-1.2323	0.82196	0.82191	1	14140	1	-1.2323
PPIAL4G	4	0.0045232	0.015735	0.187529	1583	2	-0.57165	0.9538	0.95383	1	16500	0	-0.57165
CCNK	4	0.0045249	0.01574	0.187529	1584	3	-1.0744	0.026832	0.074165	0.741021	1890	1	-1.0744
CCDC40	4	0.004533	0.015767	0.187735	1585	4	-0.50483	0.99547	0.99545	1	17666	0	-0.50483
FIP1L1	4	0.0045414	0.015797	0.187966	1586	4	-1.6953	0.99546	0.99545	1	17665	0	-1.6953
ACD	4	0.0045598	0.015855	0.188546	1587	4	-0.84024	0.99036	0.99036	1	17437	0	-0.84024
OR4F5	4	0.0046233	0.016069	0.190963	1588	3	-1.0515	0.80505	0.80556	1	13879	1	-1.0515
TP53TG3D	4	0.0046333	0.016103	0.191248	1589	3	-0.96018	0.96752	0.96753	1	16790	0	-0.96018
STEAP3	4	0.0046548	0.016169	0.191912	1590	3	-1.0458	0.044622	0.11032	0.819139	2541	1	-1.0458
DPM2	4	0.0047153	0.016381	0.194304	1591	4	-0.47579	0.99528	0.99528	1	17662	0	-0.47579
WDR83	4	0.004722	0.016406	0.194486	1592	4	-1.0493	0.99528	0.99527	1	17661	0	-1.0493
MRPS24	4	0.0047301	0.016439	0.194749	1593	3	-1.1069	0.74274	0.7532	1	12977	1	-1.1069
ZFHX4	4	0.0047354	0.016455	0.194809	1594	4	-0.8516	0.99526	0.99526	1	17660	0	-0.8516
PPIAL4C	4	0.0047387	0.016465	0.194809	1595	2	-0.70757	0.37912	0.52378	1	9353	2	-0.70757
NRBP1	4	0.0047602	0.016538	0.195557	1596	3	-1.266	0.33647	0.47967	1	8680	1	-1.266
MPO	4	0.0047632	0.016548	0.195557	1597	4	-0.52065	0.99524	0.99523	1	17659	0	-0.52065
RNF103-CHMP3	4	0.004777	0.016613	0.196196	1598	3	-0.94468	0.48471	0.60549	1	10640	1	-0.94468
ZNF7	4	0.0047939	0.016671	0.196761	1599	3	-0.64306	0.98567	0.98565	1	17282	0	-0.64306
RBM39	4	0.0048034	0.016703	0.196941	1600	3	-1.1837	0.95464	0.95467	1	16519	0	-1.1837
BRF2	4	0.0048056	0.016707	0.196941	1601	4	-0.85057	0.99519	0.99519	1	17657	0	-0.85057
MED6	4	0.0048142	0.016734	0.197133	1602	4	-1.2302	0.992	0.99201	1	17502	0	-1.2302
ANKLE2	4	0.0048211	0.016754	0.197251	1603	4	-1.2563	0.99518	0.99518	1	17656	0	-1.2563
INO80	4	0.0048295	0.016781	0.197314	1604	3	-1.7164	0.77052	0.77521	1	13338	1	-1.7164
ESRP1	4	0.0048405	0.016813	0.197567	1605	4	-0.77574	0.99516	0.99516	1	17655	0	-0.77574
ATXN10	4	0.0048444	0.016826	0.197604	1606	4	-1.0775	0.99516	0.99516	1	17654	0	-1.0775
RFK	4	0.0048584	0.016873	0.198035	1607	3	-0.99272	0.81581	0.81586	1	14047	1	-0.99272
NPIPA8	4	0.004867	0.016902	0.198244	1608	3	-1.2336	0.39845	0.54377	1	9664	1	-1.2336
HNRNPL	4	0.0048864	0.016967	0.198889	1609	4	-0.90332	0.99511	0.99512	1	17652	0	-0.90332
RBBP5	4	0.0049089	0.017044	0.199669	1610	4	-1.1118	0.99509	0.9951	1	17651	0	-1.1118
XPO7	4	0.0049316	0.017124	0.200472	1611	4	-0.54422	0.99507	0.99508	1	17650	0	-0.54422
CFL1	4	0.0049464	0.017164	0.200806	1612	4	-0.69396	0.99505	0.99506	1	17649	0	-0.69396
KIAA0907	4	0.0049484	0.017173	0.200806	1613	4	-0.772	0.99505	0.99506	1	17648	0	-0.772
ERH	4	0.0049563	0.017197	0.200964	1614	3	-1.9523	0.73049	0.74411	1	12815	1	-1.9523
HIST1H2BJ	4	0.0049911	0.017315	0.202217	1615	2	-1.3523	0.9743	0.97442	1	16951	0	-1.3523
EIF5B	4	0.005002	0.017342	0.202404	1616	4	-0.94205	0.995	0.99501	1	17647	0	-0.94205
SRPR	4	0.0050083	0.017367	0.202564	1617	3	-0.97874	0.95685	0.95686	1	16562	0	-0.97874
RBM42	4	0.0050135	0.017377	0.202564	1618	4	-0.50709	0.99499	0.995	1	17646	0	-0.50709
FRG2	4	0.0050219	0.017407	0.202781	1619	4	-0.74918	0.99498	0.99498	1	17645	0	-0.74918
B4GALT3	4	0.0050621	0.017546	0.20428	1620	4	-0.77377	0.99494	0.99494	1	17644	0	-0.77377
TBCB	4	0.0050677	0.017569	0.204406	1621	3	-1.7467	0.6378	0.68379	1	11857	1	-1.7467
GMPS	4	0.0050695	0.017579	0.204406	1622	4	-1.5953	0.9934	0.99343	1	17558	0	-1.5953
TSR1	4	0.0050888	0.017643	0.20503	1623	4	-1.4086	0.98887	0.98886	1	17381	0	-1.4086
GOLGA8N	4	0.0051064	0.017702	0.205586	1624	4	-1.5982	0.98963	0.9896	1	17412	0	-1.5982
BAZ1B	4	0.0051146	0.017728	0.205764	1625	4	-0.82196	0.99489	0.99489	1	17641	0	-0.82196
PPAN-P2RY11	4	0.0051311	0.017775	0.206184	1626	3	-1.2665	0.64204	0.68631	1	11903	1	-1.2665
SNAPC1	4	0.005147	0.017814	0.206502	1627	3	-0.90281	0.24972	0.39002	1	7320	1	-0.90281
PRAMEF6	4	0.0051685	0.017885	0.207207	1628	4	-1.3082	0.99483	0.99484	1	17639	0	-1.3082
FAM21C	4	0.0051778	0.017919	0.207469	1629	3	-0.92736	0.3123	0.45467	1	8283	1	-0.92736
MBTD1	4	0.0052033	0.018013	0.208433	1630	4	-0.56269	0.9948	0.9948	1	17637	0	-0.56269
BRD4	4	0.0052069	0.018027	0.208463	1631	4	-0.54705	0.99479	0.9948	1	17636	0	-0.54705
ASAP1	4	0.0052228	0.018077	0.208904	1632	4	-0.68749	0.99478	0.99479	1	17635	0	-0.68749
MBD3L3	4	0.0052271	0.018088	0.208904	1633	3	-1.0035	0.77628	0.77998	1	13420	1	-1.0035
TLCD1	4	0.00523	0.018098	0.208904	1634	4	-0.68498	0.99477	0.99478	1	17634	0	-0.68498
CRYGB	4	0.0052704	0.018234	0.210298	1635	4	-0.43729	0.99473	0.99475	1	17633	0	-0.43729
PCF11	4	0.0052729	0.018241	0.210298	1636	4	-0.94296	0.99473	0.99475	1	17632	0	-0.94296
MRPL27	4	0.0052766	0.018252	0.210298	1637	4	-1.4039	0.99472	0.99475	1	17631	0	-1.4039
C9orf129	4	0.0052818	0.018273	0.210411	1638	4	-0.69309	0.99472	0.99474	1	17630	0	-0.69309
MAP2K2	4	0.0052974	0.018326	0.210848	1639	4	-0.56792	0.9947	0.99472	1	17629	0	-0.56792
NUTM2G	4	0.0052995	0.018334	0.210848	1640	3	-0.82599	0.93515	0.93521	1	16128	0	-0.82599
CDCA5	4	0.0053116	0.01837	0.211142	1641	3	-1.0197	0.97739	0.97756	1	17041	0	-1.0197
DNMT1	4	0.0053279	0.018419	0.211573	1642	3	-1.5406	0.97864	0.97877	1	17078	0	-1.5406
PRUNE	4	0.0053527	0.0185	0.212372	1643	4	-0.57559	0.99465	0.99467	1	17627	0	-0.57559
TBC1D28	4	0.0053623	0.018528	0.212568	1644	4	-1.006	0.9898	0.98976	1	17417	0	-1.006
MRPS33	4	0.0053751	0.01857	0.212727	1645	3	-0.7399	0.88934	0.8893	1	15297	0	-0.7399
CD276	4	0.0053764	0.018573	0.212727	1646	4	-0.81537	0.99462	0.99464	1	17625	0	-0.81537
MRPL28	4	0.0053779	0.018576	0.212727	1647	4	-0.80261	0.99462	0.99464	1	17624	0	-0.80261
PRKAG2	4	0.0054281	0.018755	0.214644	1648	4	-0.36824	0.99457	0.99459	1	17623	0	-0.36824
HNRNPK	4	0.0054732	0.018907	0.216254	1649	3	-1.0549	0.97341	0.97353	1	16930	0	-1.0549
PRC1	4	0.0054936	0.018985	0.217016	1650	4	-1.0572	0.99451	0.99453	1	17621	0	-1.0572
GNL2	4	0.0054998	0.019004	0.2171	1651	3	-1.4585	0.93432	0.93438	1	16107	0	-1.4585
SLC25A10	4	0.0055053	0.019022	0.217172	1652	4	-0.55047	0.99449	0.99452	1	17619	0	-0.55047
POM121	4	0.0055164	0.019056	0.21743	1653	4	-0.89675	0.99069	0.99069	1	17452	0	-0.89675
GINS4	4	0.0055461	0.019146	0.218333	1654	3	-1.2516	0.95881	0.95883	1	16592	0	-1.2516
PRCC	4	0.0055517	0.019159	0.218351	1655	3	-1.2288	0.95061	0.95066	1	16437	0	-1.2288
CCDC71	4	0.0055742	0.019227	0.21888	1656	4	-0.40243	0.99443	0.99445	1	17618	0	-0.40243
TCOF1	4	0.0055759	0.019236	0.21888	1657	4	-0.77908	0.9891	0.9891	1	17390	0	-0.77908
PPM1D	4	0.0055775	0.019241	0.21888	1658	4	-0.96048	0.99442	0.99444	1	17617	0	-0.96048
FAM35A	4	0.0056095	0.019352	0.220012	1659	3	-1.0484	0.19055	0.32881	0.973997	6371	1	-1.0484
UBE2C	4	0.0056279	0.019416	0.220613	1660	4	-0.64076	0.99437	0.99439	1	17615	0	-0.64076
MED7	4	0.0056358	0.01944	0.220754	1661	4	-1.6015	0.99361	0.99364	1	17574	0	-1.6015
SMG8	4	0.0056623	0.019529	0.221462	1662	4	-0.49927	0.99434	0.99436	1	17614	0	-0.49927
AMY1B	4	0.0056645	0.019533	0.221462	1663	4	-0.70412	0.99434	0.99436	1	17613	0	-0.70412
SART1	4	0.0056659	0.019538	0.221462	1664	3	-0.8501	0.98399	0.98397	1	17229	0	-0.8501
VDAC1	4	0.0056771	0.019574	0.221671	1665	4	-0.75954	0.99432	0.99435	1	17612	0	-0.75954
NDUFA8	4	0.0056791	0.01958	0.221671	1666	3	-1.1105	0.98349	0.98347	1	17218	0	-1.1105
TMEM55A	4	0.0056963	0.019639	0.222203	1667	4	-0.58244	0.9943	0.99434	1	17611	0	-0.58244
ICE1	4	0.0057216	0.019726	0.22306	1668	4	-0.92535	0.99428	0.99432	1	17609	0	-0.92535
C8orf89	4	0.0057453	0.019801	0.223589	1669	4	-1.0311	0.99167	0.9917	1	17491	0	-1.0311
NDUFA4L2	4	0.0057481	0.019807	0.223589	1670	4	-0.78474	0.99425	0.99429	1	17608	0	-0.78474
RBBP6	4	0.0057491	0.019809	0.223589	1671	3	-1.3163	0.79637	0.79762	1	13734	1	-1.3163
SSU72	4	0.0057769	0.019893	0.224408	1672	4	-0.94437	0.99422	0.99426	1	17607	0	-0.94437
CHCHD4	4	0.0057953	0.019956	0.224983	1673	4	-0.96807	0.98679	0.98675	1	17316	0	-0.96807
MTRNR2L4	4	0.0058236	0.020044	0.225847	1674	3	-1.0527	0.8301	0.83009	1	14280	0	-1.0527
CCT8	4	0.0058427	0.020109	0.226439	1675	2	-0.65514	0.0046289	0.016086	0.560456	542	2	-0.65514
DHX30	4	0.0058601	0.020165	0.226935	1676	3	-0.76917	0.96838	0.96842	1	16810	0	-0.76917
NDUFAF3	4	0.0058708	0.020207	0.227272	1677	4	-1.2557	0.99413	0.99417	1	17605	0	-1.2557
ELP4	4	0.0058871	0.020262	0.227749	1678	4	-1.4626	0.99343	0.99346	1	17562	0	-1.4626
EPRS	4	0.0059491	0.020485	0.230089	1679	3	-1.3777	0.88383	0.88383	1	15194	0	-1.3777
SCAP	4	0.0059532	0.020497	0.230089	1680	4	-0.64765	0.99405	0.99409	1	17604	0	-0.64765
DPY19L4	4	0.0059606	0.020513	0.230089	1681	4	-0.78912	0.99404	0.99409	1	17603	0	-0.78912
RPL12	4	0.005962	0.020518	0.230089	1682	3	-1.7513	0.93766	0.93772	1	16173	0	-1.7513
MRPL50	4	0.0059744	0.020565	0.230476	1683	3	-0.9663	0.89329	0.89321	1	15368	0	-0.9663
NELFA	4	0.0059805	0.020593	0.23065	1684	4	-0.96498	0.99402	0.99407	1	17601	0	-0.96498
PET100	4	0.00599	0.020627	0.230817	1685	4	-0.8682	0.99398	0.99402	1	17598	0	-0.8682
RNMTL1	4	0.0059908	0.020632	0.230817	1686	4	-1.0791	0.99401	0.99406	1	17600	0	-1.0791
UBE2J2	4	0.0060051	0.020683	0.231243	1687	4	-0.59135	0.99399	0.99404	1	17599	0	-0.59135
UROS	4	0.0060213	0.020737	0.231695	1688	3	-0.73389	0.93963	0.93971	1	16207	0	-0.73389
SRRT	4	0.006024	0.020748	0.231695	1689	4	-1.1908	0.99398	0.99402	1	17597	0	-1.1908
PPP1R7	4	0.0060291	0.020765	0.231757	1690	3	-2.1165	0.026416	0.073299	0.73921	1872	1	-2.1165
GPIHBP1	4	0.0060435	0.020813	0.232062	1691	4	-0.64295	0.99396	0.994	1	17596	0	-0.64295
WDR59	4	0.0060448	0.020817	0.232062	1692	4	-1.0791	0.99353	0.99355	1	17569	0	-1.0791
RGPD8	4	0.0060546	0.02085	0.232288	1693	3	-1.5334	0.7535	0.76158	1	13114	1	-1.5334
TRNAU1AP	4	0.0060619	0.020871	0.232384	1694	4	-0.92819	0.99394	0.99398	1	17595	0	-0.92819
BRAP	4	0.0060645	0.020884	0.232399	1695	3	-1.2678	0.96816	0.9682	1	16804	0	-1.2678
GNG5	4	0.006078	0.020925	0.232711	1696	4	-0.81865	0.99392	0.99396	1	17594	0	-0.81865
KRTAP5-6	4	0.0060922	0.020962	0.23288	1697	3	-1.0147	0.68683	0.71409	1	12329	1	-1.0147
KIRREL	4	0.006093	0.020965	0.23288	1698	4	-0.58007	0.99391	0.99394	1	17593	0	-0.58007
ZFC3H1	4	0.0061063	0.021008	0.23322	1699	4	-0.75828	0.99389	0.99393	1	17592	0	-0.75828
IPO11	4	0.0061162	0.021036	0.233398	1700	4	-1.2409	0.99388	0.99392	1	17591	0	-1.2409
RHBDF1	4	0.0061243	0.02106	0.233528	1701	4	-0.77325	0.99388	0.99391	1	17590	0	-0.77325
FTSJ2	3	0.0061318	0.016773	0.197314	1702	3	-0.8066	0.99387	0.99399	1	17589	0	-0.8066
ATP6AP2	4	0.0061505	0.021152	0.234406	1703	3	-1.6576	0.30297	0.44498	1	8132	1	-1.6576
KRTCAP2	4	0.0061568	0.021174	0.234406	1704	4	-0.8339	0.99384	0.99388	1	17587	0	-0.8339
DDX47	4	0.0061574	0.021176	0.234406	1705	3	-1.5832	0.97507	0.97521	1	16975	0	-1.5832
STAG2	4	0.0061662	0.021207	0.234611	1706	4	-0.48783	0.99383	0.99387	1	17586	0	-0.48783
CTAGE6	4	0.0061733	0.021225	0.23467	1707	3	-0.92071	0.98194	0.98195	1	17176	0	-0.92071
CDK13	4	0.006179	0.021243	0.23473	1708	4	-1.0245	0.99382	0.99385	1	17585	0	-1.0245
TCAF2	4	0.0062036	0.021317	0.235415	1709	4	-0.7338	0.9938	0.99383	1	17584	0	-0.7338
EIF1	4	0.0062132	0.021349	0.235533	1710	3	-1.2626	0.32427	0.46695	1	8484	1	-1.2626
TSEN2	4	0.0062147	0.021353	0.235533	1711	4	-0.44098	0.99379	0.99381	1	17583	0	-0.44098
MEN1	4	0.006227	0.021398	0.235887	1712	4	-0.67557	0.99377	0.9938	1	17582	0	-0.67557
ATXN7L3	4	0.0062747	0.021552	0.237453	1713	4	-0.82713	0.99373	0.99376	1	17580	0	-0.82713
MSC	4	0.0062919	0.021597	0.237811	1714	4	-0.77095	0.99371	0.99374	1	17577	0	-0.77095
EXOSC7	4	0.0063076	0.021649	0.238244	1715	3	-0.99891	0.63896	0.68447	1	11871	1	-0.99891
UTP14A	4	0.006331	0.021722	0.238901	1716	4	-0.67993	0.99367	0.9937	1	17576	0	-0.67993
PPWD1	4	0.0063359	0.021737	0.238929	1717	3	-0.97694	0.72556	0.74059	1	12755	1	-0.97694
SPC25	4	0.0063566	0.02181	0.239591	1718	2	-1.3963	0.32789	0.47074	1	8535	1	-1.3963
PAF1	4	0.0063811	0.021894	0.240378	1719	4	-0.80354	0.99362	0.99365	1	17575	0	-0.80354
CHIT1	4	0.0063943	0.021929	0.240599	1720	4	-0.47778	0.99361	0.99363	1	17573	0	-0.47778
ATP6V1C1	4	0.0063979	0.02194	0.240599	1721	4	-1.4955	0.9936	0.99363	1	17572	0	-1.4955
MPHOSPH8	4	0.0064327	0.022052	0.241684	1722	4	-0.53721	0.99357	0.99359	1	17571	0	-0.53721
TSPAN31	4	0.0064581	0.022134	0.242445	1723	4	-0.51033	0.99354	0.99357	1	17570	0	-0.51033
MRPS27	4	0.0064684	0.022162	0.242614	1724	3	-1.0531	0.98222	0.98222	1	17185	0	-1.0531
HMGA1	4	0.0064759	0.022185	0.242672	1725	4	-0.77389	0.98839	0.9884	1	17371	0	-0.77389
MFSD3	4	0.006478	0.022193	0.242672	1726	4	-1.1689	0.99352	0.99355	1	17568	0	-1.1689
STK35	4	0.0064943	0.022246	0.242921	1727	4	-0.60766	0.99351	0.99354	1	17567	0	-0.60766
TUBGCP2	4	0.0064951	0.022252	0.242921	1728	3	-1.5921	0.82512	0.82506	1	14199	0	-1.5921
BNIPL	4	0.0064956	0.022254	0.242921	1729	4	-0.55181	0.9935	0.99354	1	17566	0	-0.55181
RPL13A	4	0.0065198	0.022334	0.24365	1730	3	-1.3192	0.43533	0.58195	1	10274	1	-1.3192
SUMO2	4	0.0065286	0.02236	0.243722	1731	3	-1.8052	0.62458	0.67617	1	11739	1	-1.8052
TMEM191C	4	0.0065342	0.022378	0.243722	1732	3	-1.4001	0.30555	0.44761	1	8177	1	-1.4001
AQP5	4	0.0065344	0.022379	0.243722	1733	4	-1.0714	0.99347	0.9935	1	17565	0	-1.0714
FEN1	4	0.0065507	0.022433	0.244166	1734	3	-1.1113	0.46784	0.59793	1	10513	1	-1.1113
UTP18	4	0.0065552	0.022449	0.244197	1735	4	-1.11	0.99344	0.99347	1	17564	0	-1.11
RMDN1	4	0.0065637	0.022476	0.244353	1736	4	-0.60199	0.99344	0.99347	1	17563	0	-0.60199
TRPM7	4	0.0065821	0.02253	0.244799	1737	4	-0.8964	0.99342	0.99345	1	17561	0	-0.8964
KAT5	4	0.006591	0.022561	0.24498	1738	3	-1.5555	0.90272	0.90271	1	15531	0	-1.5555
ADAR	4	0.0065968	0.022579	0.24498	1739	4	-1.2279	0.9934	0.99344	1	17559	0	-1.2279
PRDM14	4	0.0065984	0.022586	0.24498	1740	4	-0.89507	0.98887	0.98887	1	17382	0	-0.89507
MRPL16	4	0.0066317	0.022699	0.245954	1741	3	-1.1402	0.96983	0.96984	1	16854	0	-1.1402
BRD2	4	0.0066324	0.022702	0.245954	1742	4	-1.1393	0.99337	0.9934	1	17557	0	-1.1393
FXN	4	0.0066423	0.022738	0.246205	1743	4	-1.0466	0.99336	0.99339	1	17556	0	-1.0466
ATP5L	4	0.0066571	0.022785	0.246574	1744	4	-0.62936	0.99334	0.99337	1	17555	0	-0.62936
NDUFS8	4	0.0066714	0.022834	0.246961	1745	3	-1.4356	0.15282	0.28948	0.952349	5738	1	-1.4356
SRFBP1	4	0.006707	0.022951	0.248083	1746	3	-0.97462	0.68716	0.71429	1	12332	1	-0.97462
DERL2	4	0.0067133	0.022975	0.248196	1747	3	-1.2556	0.74107	0.75191	1	12956	1	-1.2556
NUP214	4	0.0067175	0.022987	0.248196	1748	3	-1.4602	0.9757	0.97585	1	16995	0	-1.4602
POTEF	4	0.0067343	0.023058	0.248812	1749	3	-0.79454	0.47833	0.60263	1	10588	1	-0.79454
PRR20B	4	0.0067402	0.023076	0.248868	1750	4	-0.49818	0.99326	0.99329	1	17551	0	-0.49818
AMY1C	4	0.0067491	0.023104	0.248905	1751	3	-1.0432	0.70586	0.72668	1	12537	1	-1.0432
SLC25A3	4	0.006753	0.023116	0.248905	1752	3	-1.5373	0.70384	0.72531	1	12517	1	-1.5373
TGFBRAP1	4	0.006754	0.023119	0.248905	1753	4	-0.54753	0.99325	0.99327	1	17550	0	-0.54753
RPF1	4	0.0067627	0.023147	0.249062	1754	4	-1.08	0.99324	0.99326	1	17549	0	-1.08
XPNPEP3	4	0.0067702	0.023176	0.249167	1755	4	-0.61159	0.99323	0.99326	1	17548	0	-0.61159
MRPL37	4	0.0067723	0.023183	0.249167	1756	3	-1.8185	0.93402	0.93407	1	16102	0	-1.8185
MIS12	4	0.0067871	0.023223	0.249454	1757	3	-0.88594	0.98105	0.98106	1	17144	0	-0.88594
COPS6	4	0.0068244	0.023334	0.250505	1758	3	-1.4005	0.97957	0.97967	1	17099	0	-1.4005
SLC14A1	4	0.0068418	0.023384	0.250897	1759	4	-0.49358	0.99316	0.99319	1	17547	0	-0.49358
TSPY8	4	0.0068721	0.023482	0.251806	1760	4	-1.0881	0.99313	0.99315	1	17544	0	-1.0881
MBD3L2	4	0.0069084	0.023588	0.252804	1761	3	-1.0632	0.97242	0.97253	1	16908	0	-1.0632
LY6H	4	0.0069341	0.023671	0.253548	1762	3	-1.1267	0.32308	0.46571	1	8462	1	-1.1267
FAM58A	4	0.0069986	0.023893	0.255742	1763	3	-0.7357	0.96841	0.96846	1	16813	0	-0.7357
ANAPC13	4	0.007002	0.023907	0.255742	1764	4	-1.3501	0.993	0.99302	1	17540	0	-1.3501
TXNDC17	4	0.0070059	0.023918	0.255742	1765	4	-0.67904	0.99299	0.99302	1	17539	0	-0.67904
COX10	4	0.0070098	0.02393	0.255742	1766	3	-0.63094	0.43881	0.58542	1	10333	1	-0.63094
WDR70	4	0.0070669	0.024112	0.257541	1767	3	-1.3301	0.42234	0.56855	1	10044	1	-1.3301
CLEC18C	4	0.0070961	0.024216	0.258379	1768	4	-0.81468	0.9929	0.99293	1	17538	0	-0.81468
FLYWCH1	4	0.0070983	0.024224	0.258379	1769	4	-0.97904	0.98672	0.98667	1	17315	0	-0.97904
NBN	4	0.0071005	0.024232	0.258379	1770	3	-0.71079	0.18824	0.32635	0.972062	6333	1	-0.71079
IMMT	4	0.0071377	0.024355	0.259484	1771	4	-0.82088	0.99286	0.99289	1	17536	0	-0.82088
PRAMEF9	4	0.0071397	0.024363	0.259484	1772	3	-1.0058	0.024753	0.069827	0.734607	1795	1	-1.0058
TBP	4	0.0071481	0.024392	0.25965	1773	4	-0.91221	0.99285	0.99288	1	17535	0	-0.91221
MRPL14	4	0.0071572	0.024424	0.259844	1774	3	-1.3598	0.97543	0.97558	1	16989	0	-1.3598
SNAPC4	4	0.0071817	0.024503	0.260539	1775	3	-1.6288	0.87642	0.87639	1	15070	0	-1.6288
MRPL20	4	0.0071989	0.024554	0.260933	1776	3	-1.9834	0.7529	0.76111	1	13105	1	-1.9834
ALDH16A1	4	0.0072305	0.02464	0.2617	1777	4	-0.77398	0.99277	0.99279	1	17533	0	-0.77398
ATP6V0A1	4	0.0072628	0.02474	0.262616	1778	3	-0.68017	0.7151	0.73306	1	12632	1	-0.68017
GOLGA6D	4	0.0072694	0.024763	0.262688	1779	3	-0.9263	0.31991	0.46252	1	8394	1	-0.9263
POLR3F	4	0.0072738	0.024775	0.262688	1780	3	-0.99194	0.61739	0.67207	1	11669	1	-0.99194
NDUFA3	4	0.007296	0.02485	0.26334	1781	3	-0.85239	0.9684	0.96844	1	16811	0	-0.85239
MTRNR2L1	2	0.0072964	0.013917	0.172332	1782	2	-0.94593	0.9927	0.99269	1	17531	0	-0.94593
FOXD4L3	4	0.0073269	0.024949	0.264222	1783	4	-0.43883	0.99267	0.9927	1	17530	0	-0.43883
FECH	4	0.0073315	0.024961	0.264222	1784	3	-0.95809	0.97974	0.97983	1	17102	0	-0.95809
PPIL2	4	0.0073575	0.025038	0.264889	1785	4	-1.3137	0.99264	0.99266	1	17529	0	-1.3137
CLPX	4	0.0073815	0.025111	0.265506	1786	4	-0.53781	0.99262	0.99264	1	17528	0	-0.53781
TMX2	4	0.0074069	0.025194	0.266194	1787	4	-0.96295	0.99259	0.99262	1	17527	0	-0.96295
GET4	4	0.0074095	0.025204	0.266194	1788	3	-1.4025	0.89323	0.89315	1	15366	0	-1.4025
MRPL55	4	0.0074275	0.025261	0.266649	1789	3	-1.0213	0.77325	0.77745	1	13375	1	-1.0213
WARS2	4	0.0074354	0.025282	0.266716	1790	2	-0.44603	0.40482	0.55035	1	9768	2	-0.44603
TACC3	4	0.0074454	0.025312	0.266882	1791	3	-0.80964	0.96779	0.96782	1	16795	0	-0.80964
USP21	4	0.0074552	0.025346	0.267092	1792	4	-0.69622	0.99254	0.99257	1	17525	0	-0.69622
EIF3M	4	0.0074634	0.025377	0.267269	1793	3	-0.86683	0.85919	0.85902	1	14748	0	-0.86683
SLC27A3	4	0.00747	0.025401	0.267379	1794	4	-0.50527	0.99253	0.99255	1	17524	0	-0.50527
NUP133	4	0.0074949	0.025477	0.268024	1795	3	-1.0182	0.45165	0.59089	1	10408	1	-1.0182
WBSCR16	4	0.0075017	0.025505	0.268167	1796	3	-1.4768	0.98482	0.98481	1	17262	0	-1.4768
SLC11A1	4	0.0075118	0.025539	0.268205	1797	4	-0.46409	0.99249	0.99251	1	17522	0	-0.46409
KMT2B	4	0.0075152	0.025546	0.268205	1798	3	-0.89229	0.91809	0.9181	1	15806	0	-0.89229
RIC8A	4	0.0075172	0.025551	0.268205	1799	4	-0.84913	0.99248	0.99251	1	17521	0	-0.84913
B4GALT2	4	0.0075579	0.025671	0.269171	1800	4	-0.51998	0.99244	0.99246	1	17520	0	-0.51998
CCNT1	4	0.0075582	0.025671	0.269171	1801	4	-1.0377	0.99165	0.99168	1	17488	0	-1.0377
LOC100289561	4	0.0075745	0.025724	0.269571	1802	2	-0.46466	0.676	0.70709	1	12224	1	-0.46466
FANCA	4	0.0075799	0.025738	0.269575	1803	3	-1.6133	0.68612	0.71364	1	12326	1	-1.6133
DEPTOR	4	0.0075907	0.025778	0.269843	1804	3	-1.013	0.9253	0.92543	1	15941	0	-1.013
USP38	4	0.0076164	0.025847	0.270418	1805	4	-0.58944	0.99238	0.9924	1	17519	0	-0.58944
STK3	4	0.0076226	0.025865	0.270454	1806	4	-0.55293	0.99238	0.9924	1	17518	0	-0.55293
URGCP-MRPS24	4	0.0076309	0.02589	0.270473	1807	3	-0.86786	0.11737	0.24561	0.916195	5062	1	-0.86786
KRTAP4-8	4	0.0076338	0.025896	0.270473	1808	3	-0.75718	0.31022	0.45252	1	8256	1	-0.75718
ERAL1	4	0.0076515	0.025951	0.270898	1809	3	-0.98949	0.38233	0.52705	1	9408	1	-0.98949
PRPF4B	4	0.0076726	0.026006	0.271323	1810	4	-0.85262	0.99233	0.99235	1	17516	0	-0.85262
SMC5	4	0.0077018	0.026094	0.272091	1811	3	-1.0498	0.95479	0.95482	1	16523	0	-1.0498
PHF23	4	0.0077236	0.026168	0.272712	1812	4	-0.60262	0.99228	0.9923	1	17514	0	-0.60262
ASPSCR1	4	0.0077332	0.026197	0.272862	1813	4	-0.70936	0.99227	0.99229	1	17513	0	-0.70936
ANAPC5	4	0.0077457	0.026238	0.273137	1814	4	-1.2579	0.99225	0.99228	1	17512	0	-1.2579
SERPIND1	4	0.007757	0.026271	0.27333	1815	3	-0.61157	0.42815	0.57464	1	10143	1	-0.61157
OR2G6	4	0.0077616	0.026287	0.273349	1816	3	-0.48917	0.90118	0.90114	1	15502	0	-0.48917
DDX55	4	0.0077778	0.026342	0.273685	1817	3	-0.88493	0.98161	0.98162	1	17159	0	-0.88493
ZNF672	4	0.0077789	0.026348	0.273685	1818	4	-0.52329	0.99222	0.99224	1	17511	0	-0.52329
CCNL1	4	0.0077901	0.026383	0.273852	1819	4	-0.69921	0.99221	0.99223	1	17510	0	-0.69921
BRAT1	4	0.007794	0.026393	0.273852	1820	3	-1.2624	0.88607	0.88605	1	15236	0	-1.2624
FAM219A	4	0.0077986	0.02641	0.273876	1821	3	-0.95484	0.74622	0.75584	1	13022	1	-0.95484
ZNF706	4	0.0078123	0.026456	0.274204	1822	4	-0.44597	0.99219	0.99221	1	17509	0	-0.44597
COG3	4	0.0078766	0.026663	0.276199	1823	4	-1.0049	0.99212	0.99214	1	17508	0	-1.0049
TMED4	4	0.0079077	0.026764	0.277095	1824	4	-0.69361	0.98595	0.98594	1	17291	0	-0.69361
MDM4	4	0.0079171	0.026798	0.277285	1825	3	-1.0666	0.97673	0.97689	1	17023	0	-1.0666
PTCD1	4	0.0079288	0.02683	0.27742	1826	3	-1.7647	0.73648	0.7484	1	12886	1	-1.7647
C11orf57	4	0.0079334	0.02684	0.27742	1827	3	-1.2616	0.21756	0.35681	0.99036	6802	1	-1.2616
CHMP5	4	0.0079442	0.026864	0.277512	1828	3	-1.3542	0.69773	0.72124	1	12438	1	-1.3542
AHCYL1	4	0.0079624	0.026925	0.277999	1829	4	-1.12	0.99204	0.99205	1	17504	0	-1.12
INTS10	4	0.0079836	0.026996	0.278578	1830	4	-1.2785	0.99202	0.99203	1	17503	0	-1.2785
RAB6A	4	0.0080048	0.027058	0.279064	1831	2	-0.78457	0.45269	0.59135	1	10414	1	-0.78457
HS6ST1	4	0.0080158	0.027094	0.279279	1832	3	-0.83444	0.65579	0.69457	1	12044	1	-0.83444
NCAPG	4	0.0080324	0.027153	0.279737	1833	4	-1.4137	0.98849	0.98851	1	17374	0	-1.4137
PTP4A3	4	0.0080438	0.027187	0.279935	1834	3	-1.0114	0.7275	0.74197	1	12773	1	-1.0114
ZHX2	4	0.0080539	0.027214	0.280058	1835	4	-0.59867	0.99195	0.99196	1	17501	0	-0.59867
OBP2A	4	0.008058	0.02723	0.280072	1836	3	-0.77282	0.79668	0.7979	1	13739	1	-0.77282
KDM8	4	0.0080651	0.027255	0.280179	1837	3	-0.91622	0.49029	0.60798	1	10682	1	-0.91622
ABRA	4	0.008076	0.027292	0.280409	1838	4	-0.63996	0.99192	0.99194	1	17500	0	-0.63996
ARPC2	4	0.0081077	0.027389	0.281252	1839	4	-0.74759	0.99084	0.99083	1	17459	0	-0.74759
CAND1	4	0.0081195	0.027432	0.281506	1840	3	-0.64027	0.97736	0.97754	1	17040	0	-0.64027
SCUBE3	4	0.0081246	0.027444	0.281506	1841	4	-0.7498	0.99188	0.9919	1	17498	0	-0.7498
RFWD3	4	0.0081433	0.027503	0.281961	1842	3	-1.0977	0.91768	0.91771	1	15797	0	-1.0977
CDK3	4	0.0081699	0.027583	0.282629	1843	4	-0.56274	0.99183	0.99185	1	17496	0	-0.56274
CTCF	4	0.0082381	0.027794	0.284629	1844	3	-1.0177	0.98009	0.98016	1	17108	0	-1.0177
GTF2H2C	4	0.0082493	0.027835	0.284894	1845	2	-0.94328	0.0040551	0.014181	0.54568	490	2	-0.94328
MFF	4	0.0082588	0.027868	0.285077	1846	4	-0.42448	0.99174	0.99176	1	17494	0	-0.42448
CDK18	4	0.0082795	0.02793	0.285391	1847	3	-1.0097	0.92366	0.9238	1	15902	0	-1.0097
HECTD3	4	0.0082819	0.027935	0.285391	1848	3	-0.75556	0.91405	0.91406	1	15736	0	-0.75556
ZNF236	4	0.0082835	0.027944	0.285391	1849	4	-0.61952	0.99172	0.99174	1	17493	0	-0.61952
BIRC5	4	0.0083108	0.028027	0.286088	1850	3	-1.3108	0.98241	0.98243	1	17187	0	-1.3108
DDI2	4	0.0083171	0.028052	0.286185	1851	4	-0.49906	0.99168	0.9917	1	17492	0	-0.49906
COL20A1	4	0.0083346	0.028106	0.286586	1852	4	-0.52698	0.99167	0.99169	1	17490	0	-0.52698
RAE1	4	0.0083404	0.028123	0.286587	1853	4	-1.6787	0.99166	0.99169	1	17489	0	-1.6787
SLC25A26	4	0.0083445	0.028137	0.286587	1854	3	-1.512	0.97488	0.975	1	16963	0	-1.512
SRSF10	4	0.0083697	0.028215	0.287227	1855	4	-0.72371	0.99163	0.99165	1	17486	0	-0.72371
PRDM1	4	0.0084138	0.028347	0.2884	1856	4	-1.1385	0.99159	0.99162	1	17485	0	-1.1385
TUBB8	4	0.008418	0.02836	0.2884	1857	3	-1.6247	0.97684	0.977	1	17026	0	-1.6247
RARS	4	0.0084257	0.028386	0.288506	1858	2	-0.74925	0.033507	0.08795	0.7782	2127	2	-0.74925
RABGEF1	4	0.0084448	0.028448	0.288979	1859	4	-0.98559	0.99156	0.99158	1	17484	0	-0.98559
RNF4	4	0.0084512	0.028475	0.289093	1860	3	-0.68036	0.9534	0.95344	1	16494	0	-0.68036
ZNF99	4	0.0084634	0.028518	0.289382	1861	3	-0.9597	0.94558	0.94558	1	16338	0	-0.9597
CBFB	4	0.0084829	0.028577	0.289822	1862	3	-0.85018	0.97055	0.97059	1	16872	0	-0.85018
MGEA5	4	0.0085769	0.028895	0.292887	1863	4	-0.68115	0.99142	0.99146	1	17483	0	-0.68115
CWC22	4	0.0085919	0.028944	0.293229	1864	4	-0.94411	0.99141	0.99144	1	17480	0	-0.94411
ZNHIT1	4	0.0086098	0.029001	0.293573	1865	4	-0.99794	0.99139	0.99142	1	17479	0	-0.99794
ERBB4	4	0.0086128	0.029009	0.293573	1866	4	-0.44041	0.99139	0.99142	1	17478	0	-0.44041
PA2G4	4	0.0086331	0.029088	0.294211	1867	4	-0.41158	0.99137	0.99139	1	17477	0	-0.41158
ZNF587	4	0.0086473	0.029137	0.294353	1868	4	-0.38848	0.99135	0.99137	1	17476	0	-0.38848
AIFM1	4	0.0086474	0.029137	0.294353	1869	3	-0.89712	0.91447	0.9145	1	15744	0	-0.89712
PMVK	4	0.0086499	0.029149	0.294353	1870	3	-1.064	0.97526	0.97541	1	16982	0	-1.064
ITGB7	4	0.0087257	0.029399	0.29672	1871	4	-0.52561	0.99127	0.99129	1	17475	0	-0.52561
LSM3	4	0.0087441	0.029458	0.297159	1872	3	-1.2403	0.47748	0.60224	1	10582	1	-1.2403
SFSWAP	4	0.008754	0.029495	0.297376	1873	3	-0.70719	0.97013	0.97016	1	16862	0	-0.70719
ATF6	4	0.0087803	0.02959	0.298174	1874	4	-0.55995	0.99122	0.99124	1	17473	0	-0.55995
TSPY10	4	0.0087879	0.029615	0.298199	1875	4	-0.8398	0.99121	0.99123	1	17472	0	-0.8398
GAGE12I	4	0.0087914	0.029624	0.298199	1876	3	-0.82305	0.32809	0.47097	1	8537	1	-0.82305
ERBB3	4	0.0088077	0.02968	0.298599	1877	4	-0.99748	0.99119	0.9912	1	17470	0	-0.99748
LRRCC1	4	0.0088337	0.029755	0.299199	1878	4	-0.6789	0.99117	0.99117	1	17469	0	-0.6789
CADM3	4	0.008875	0.02988	0.300203	1879	4	-0.52912	0.99113	0.99113	1	17468	0	-0.52912
SHFM1	4	0.0088766	0.029887	0.300203	1880	3	-1.2686	0.96989	0.9699	1	16856	0	-1.2686
RGP1	4	0.0088992	0.029955	0.300733	1881	3	-1.3995	0.96389	0.96393	1	16710	0	-1.3995
COQ5	4	0.0089441	0.030097	0.301993	1882	4	-0.70972	0.99106	0.99106	1	17466	0	-0.70972
NDUFS7	4	0.0089749	0.030202	0.30289	1883	3	-0.90999	0.83362	0.83355	1	14336	0	-0.90999
MRTO4	4	0.0090153	0.030329	0.303996	1884	3	-1.1213	0.58968	0.65673	1	11423	1	-1.1213
H3F3C	4	0.009023	0.030363	0.304176	1885	3	-0.72716	0.97493	0.97505	1	16967	0	-0.72716
GOLGA8H	4	0.0090494	0.030445	0.304798	1886	4	-0.78669	0.99095	0.99095	1	17464	0	-0.78669
DCAKD	4	0.0090525	0.030457	0.304798	1887	4	-0.58742	0.99095	0.99095	1	17463	0	-0.58742
TMEM249	4	0.009068	0.030509	0.305156	1888	4	-0.59701	0.99093	0.99093	1	17462	0	-0.59701
EAPP	4	0.009079	0.030551	0.305413	1889	3	-0.96578	0.98552	0.9855	1	17274	0	-0.96578
EMC6	4	0.0090883	0.030578	0.305524	1890	4	-0.7421	0.99091	0.99091	1	17461	0	-0.7421
USP5	4	0.0091148	0.030651	0.30609	1891	2	-0.35429	0.3613	0.50532	1	9087	2	-0.35429
TMEM120B	4	0.0091415	0.030744	0.306855	1892	4	-0.28102	0.99086	0.99085	1	17460	0	-0.28102
OXSM	4	0.009148	0.030761	0.30686	1893	4	-0.80182	0.98694	0.9869	1	17320	0	-0.80182
POLR2E	4	0.0091794	0.030872	0.307806	1894	3	-1.3686	0.088006	0.1933	0.890975	4093	1	-1.3686
RBMY1E	4	0.0091854	0.030889	0.307811	1895	4	-0.63883	0.99081	0.99081	1	17458	0	-0.63883
CYLD	4	0.0092121	0.030984	0.308331	1896	3	-0.96661	0.74128	0.75207	1	12958	1	-0.96661
STAT5B	4	0.0092122	0.030984	0.308331	1897	4	-0.81266	0.99079	0.99077	1	17457	0	-0.81266
IL1R2	4	0.0092137	0.03099	0.308331	1898	4	-0.54188	0.99079	0.99077	1	17456	0	-0.54188
APOA4	4	0.0092295	0.031045	0.308563	1899	4	-0.45771	0.99077	0.99076	1	17455	0	-0.45771
PAPOLG	4	0.0092311	0.031052	0.308563	1900	4	-0.32308	0.99077	0.99076	1	17454	0	-0.32308
IQGAP3	4	0.0092342	0.031062	0.308563	1901	4	-0.29674	0.99077	0.99076	1	17453	0	-0.29674
ZNF131	4	0.0092443	0.031091	0.308688	1902	2	-0.93284	0.3157	0.45819	1	8327	1	-0.93284
PI4KA	4	0.0092611	0.031142	0.30893	1903	3	-0.83501	0.96278	0.96278	1	16681	0	-0.83501
RPP14	4	0.0092637	0.031148	0.30893	1904	3	-0.79655	0.6019	0.66341	1	11528	1	-0.79655
RPL22	4	0.0092998	0.031261	0.309885	1905	3	-0.70528	0.45364	0.59176	1	10420	1	-0.70528
DRAP1	4	0.009323	0.031332	0.310429	1906	4	-0.51846	0.99068	0.99067	1	17451	0	-0.51846
DCPS	4	0.0093439	0.03139	0.310758	1907	3	-1.1466	0.61127	0.66861	1	11615	1	-1.1466
PHLDA3	4	0.0093468	0.031398	0.310758	1908	4	-0.38322	0.99065	0.99064	1	17450	0	-0.38322
ATP6V1F	4	0.0093509	0.031416	0.310771	1909	3	-1.6156	0.30575	0.44782	1	8181	1	-1.6156
SUCLG1	4	0.0093899	0.031547	0.311905	1910	4	-0.35492	0.99061	0.9906	1	17449	0	-0.35492
NSMCE1	4	0.0094428	0.031708	0.313332	1911	4	-0.7127	0.99056	0.99054	1	17448	0	-0.7127
MRPL1	4	0.0094476	0.031729	0.31337	1912	4	-0.50437	0.99055	0.99054	1	17447	0	-0.50437
BNC1	4	0.0094637	0.031777	0.313682	1913	4	-0.36498	0.99054	0.99052	1	17446	0	-0.36498
RPL29	4	0.0094784	0.031825	0.313994	1914	2	-0.14068	0.84926	0.84913	1	14585	0	-0.14068
FRG1	4	0.0095023	0.031899	0.314554	1915	4	-0.85346	0.9905	0.99049	1	17444	0	-0.85346
MIPEP	4	0.0095282	0.031981	0.314971	1916	4	-0.67828	0.99047	0.99046	1	17442	0	-0.67828
NFATC2IP	4	0.0095282	0.031981	0.314971	1917	4	-0.78135	0.99047	0.99046	1	17443	0	-0.78135
COMTD1	4	0.0095314	0.031991	0.314971	1918	4	-0.26841	0.99047	0.99045	1	17441	0	-0.26841
SFXN1	4	0.0095686	0.032118	0.31606	1919	4	-0.3251	0.99043	0.99042	1	17440	0	-0.3251
POU2F1	4	0.0095741	0.032138	0.316087	1920	4	-0.61229	0.98989	0.98985	1	17420	0	-0.61229
ZBTB17	4	0.0096401	0.032347	0.317978	1921	3	-1.241	0.85473	0.85462	1	14683	0	-1.241
MTRNR2L2	4	0.0096613	0.032418	0.318514	1922	3	-1.1012	0.25479	0.39519	1	7395	1	-1.1012
UBE2N	4	0.0096744	0.032461	0.318696	1923	4	-0.74313	0.99033	0.99032	1	17436	0	-0.74313
AK4	4	0.0096793	0.032474	0.318696	1924	4	-0.27828	0.99032	0.99031	1	17435	0	-0.27828
FAM195A	4	0.0096826	0.032487	0.318696	1925	4	-0.65073	0.99032	0.99031	1	17434	0	-0.65073
BMS1	4	0.0097244	0.032625	0.31984	1926	4	-1.0282	0.99028	0.99027	1	17433	0	-1.0282
MED16	4	0.0097304	0.032638	0.31984	1927	3	-1.074	0.85948	0.85932	1	14755	0	-1.074
CARD6	4	0.0097515	0.032704	0.320321	1928	4	-0.33375	0.99025	0.99024	1	17432	0	-0.33375
DPH5	4	0.0097945	0.032835	0.321213	1929	3	-0.97578	0.97457	0.97469	1	16958	0	-0.97578
NUP35	4	0.0097993	0.032846	0.321213	1930	4	-1.0732	0.9902	0.99019	1	17431	0	-1.0732
THAP7	4	0.0097993	0.032846	0.321213	1931	4	-0.35204	0.9902	0.99019	1	17430	0	-0.35204
ZMAT2	4	0.0098315	0.032951	0.322077	1932	2	-0.4957	0.89095	0.89091	1	15328	0	-0.4957
MTDH	4	0.0098456	0.032993	0.32232	1933	4	-0.6632	0.99015	0.99013	1	17429	0	-0.6632
SEC61B	4	0.0099003	0.033156	0.323745	1934	4	-0.72818	0.9901	0.99007	1	17427	0	-0.72818
NFRKB	4	0.0099187	0.033212	0.324121	1935	4	-0.47288	0.99008	0.99005	1	17426	0	-0.47288
NFYC	4	0.009929	0.033239	0.324214	1936	2	-0.43603	0.030617	0.082012	0.763291	2028	1	-0.43603
BOP1	4	0.0099474	0.033299	0.324634	1937	3	-1.3553	0.96195	0.96193	1	16663	0	-1.3553
GSTA3	4	0.0099545	0.033319	0.324666	1938	4	-0.43541	0.99005	0.99001	1	17425	0	-0.43541
NUFIP1	4	0.0099748	0.033377	0.32506	1939	3	-0.81241	0.6924	0.71773	1	12392	1	-0.81241
IFT22	4	0.0099804	0.033397	0.325092	1940	4	-0.29949	0.99002	0.98998	1	17424	0	-0.29949
RUNX1T1	4	0.01001	0.033495	0.325873	1941	3	-1.2162	0.70252	0.72444	1	12502	1	-1.2162
AIMP2	4	0.010024	0.033537	0.326027	1942	3	-1.1045	0.94286	0.94292	1	16268	0	-1.1045
LEMD1	4	0.010026	0.033545	0.326027	1943	4	-1.3216	0.98997	0.98994	1	17422	0	-1.3216
GTF3C6	4	0.010056	0.033637	0.326588	1944	4	-0.71339	0.98994	0.98991	1	17421	0	-0.71339
GDAP1	4	0.010056	0.033638	0.326588	1945	3	-0.9884	0.94322	0.94329	1	16279	0	-0.9884
SKA3	4	0.010095	0.033749	0.327503	1946	3	-0.85384	0.38814	0.53309	1	9502	1	-0.85384
LRRC4	4	0.010105	0.033783	0.327661	1947	3	-0.71649	0.31864	0.46124	1	8371	1	-0.71649
CCZ1	4	0.010135	0.033873	0.328367	1948	3	-0.85646	0.6561	0.69477	1	12051	1	-0.85646
KMT2D	4	0.010149	0.033919	0.32864	1949	3	-0.68387	0.9247	0.92482	1	15923	0	-0.68387
LSM10	4	0.01017	0.033986	0.329127	1950	4	-1.0234	0.98983	0.9898	1	17419	0	-1.0234
NDUFB11	4	0.010176	0.034008	0.329166	1951	4	-1.0899	0.98982	0.98979	1	17418	0	-1.0899
DSCC1	4	0.010193	0.034061	0.329515	1952	2	-0.75685	0.5133	0.61854	1	10840	1	-0.75685
RFX5	4	0.010239	0.034208	0.33076	1953	3	-0.80702	0.73421	0.74677	1	12861	1	-0.80702
PTMA	4	0.010261	0.034283	0.331321	1954	4	-0.33285	0.98974	0.98971	1	17416	0	-0.33285
C9orf156	4	0.010275	0.034326	0.331562	1955	4	-0.33294	0.98973	0.98969	1	17415	0	-0.33294
HBZ	4	0.010333	0.034518	0.333196	1956	3	-0.51022	0.95053	0.95057	1	16435	0	-0.51022
AGPAT1	4	0.010336	0.03453	0.333196	1957	4	-0.70187	0.98966	0.98963	1	17414	0	-0.70187
FLAD1	4	0.01038	0.034667	0.334351	1958	4	-0.68081	0.98962	0.98959	1	17411	0	-0.68081
SNRPE	4	0.010389	0.0347	0.334498	1959	3	-0.7182	0.47487	0.60109	1	10563	1	-0.7182
RANBP1	4	0.010398	0.03474	0.334622	1960	4	-0.55466	0.9896	0.98957	1	17410	0	-0.55466
ESPN	4	0.010403	0.034749	0.334622	1961	3	-0.85053	0.72546	0.74052	1	12754	1	-0.85053
ACR	4	0.010431	0.034846	0.33535	1962	4	-0.62264	0.98957	0.98955	1	17409	0	-0.62264
ICT1	4	0.010436	0.03486	0.33535	1963	2	-1.2143	0.97874	0.97886	1	17081	0	-1.2143
TMEM106A	4	0.010444	0.03488	0.335371	1964	3	-0.56787	0.9806	0.98065	1	17128	0	-0.56787
TPRKB	4	0.010455	0.03492	0.335529	1965	3	-1.1126	0.2759	0.41703	1	7723	1	-1.1126
PDCD11	4	0.010461	0.034938	0.335529	1966	3	-1.3075	0.90798	0.90796	1	15628	0	-1.3075
DDX39A	4	0.010464	0.034949	0.335529	1967	4	-0.48315	0.98954	0.98951	1	17408	0	-0.48315
COQ3	4	0.010492	0.035038	0.336209	1968	3	-0.83151	0.9483	0.94833	1	16392	0	-0.83151
POLR2J	4	0.010498	0.035059	0.336214	1969	3	-1.4311	0.92559	0.92571	1	15948	0	-1.4311
PCDH18	4	0.010503	0.035074	0.336214	1970	3	-0.7146	0.95742	0.95742	1	16574	0	-0.7146
ZNF34	4	0.010514	0.035113	0.336415	1971	3	-0.92174	0.8572	0.85709	1	14722	0	-0.92174
MYH9	4	0.010542	0.035204	0.337113	1972	3	-0.97263	0.97736	0.97753	1	17039	0	-0.97263
PRDX2	4	0.010556	0.035241	0.337299	1973	3	-0.8672	0.94347	0.94356	1	16293	0	-0.8672
CTPS1	4	0.010574	0.035293	0.337629	1974	2	-0.78819	0.12045	0.25098	0.919197	5150	2	-0.78819
COX5B	4	0.010633	0.035474	0.339188	1975	4	-0.9737	0.98937	0.98936	1	17405	0	-0.9737
CFHR5	4	0.010644	0.035507	0.339332	1976	4	-0.43871	0.98936	0.98935	1	17404	0	-0.43871
TMEM191B	4	0.01066	0.035557	0.339499	1977	4	-0.66908	0.98934	0.98933	1	17403	0	-0.66908
SIGLEC15	4	0.010662	0.035561	0.339499	1978	4	-0.63291	0.98934	0.98933	1	17402	0	-0.63291
GOLGA8J	4	0.010677	0.035604	0.339738	1979	3	-0.90286	0.95744	0.95745	1	16575	0	-0.90286
WARS	4	0.010689	0.035631	0.339821	1980	3	-1.1849	0.23855	0.37851	1	7127	1	-1.1849
ADAP2	4	0.010713	0.035698	0.34029	1981	4	-0.6884	0.98929	0.98928	1	17399	0	-0.6884
ANKRD32	4	0.010728	0.035754	0.340434	1982	3	-0.97571	0.92104	0.92114	1	15855	0	-0.97571
KLHL42	4	0.010728	0.035755	0.340434	1983	4	-0.39574	0.98927	0.98926	1	17398	0	-0.39574
EBNA1BP2	4	0.010734	0.035767	0.340434	1984	4	-0.60123	0.98927	0.98926	1	17397	0	-0.60123
MAPKAPK2	4	0.010746	0.035811	0.340686	1985	4	-0.46907	0.98925	0.98925	1	17396	0	-0.46907
C12orf65	4	0.010787	0.035938	0.341631	1986	4	-0.48147	0.98921	0.9892	1	17395	0	-0.48147
CDC40	4	0.01079	0.03595	0.341631	1987	4	-0.71091	0.98921	0.9892	1	17394	0	-0.71091
L3MBTL2	4	0.010794	0.035965	0.341631	1988	4	-0.52589	0.98921	0.9892	1	17393	0	-0.52589
SLC3A2	4	0.010802	0.035994	0.341716	1989	3	-1.0537	0.95777	0.9578	1	16578	0	-1.0537
ZNF207	4	0.010808	0.03601	0.341716	1990	3	-0.80423	0.94788	0.94792	1	16385	0	-0.80423
SLURP1	4	0.010822	0.036053	0.341845	1991	3	-0.62838	0.3409	0.48425	1	8756	1	-0.62838
NDUFAB1	4	0.010825	0.03606	0.341845	1992	3	-1.4557	0.98476	0.98475	1	17257	0	-1.4557
MAPRE1	4	0.010842	0.036105	0.342101	1993	3	-0.85925	0.87551	0.87548	1	15054	0	-0.85925
PSME1	4	0.01089	0.036264	0.343439	1994	4	-0.49683	0.98911	0.98911	1	17391	0	-0.49683
PSMG4	4	0.010935	0.036395	0.344459	1995	2	-1.0463	0.90089	0.90083	1	15495	0	-1.0463
ISYNA1	4	0.010939	0.036409	0.344459	1996	4	-0.68724	0.98906	0.98906	1	17388	0	-0.68724
TXN2	4	0.010976	0.03651	0.345243	1997	4	-0.831	0.98902	0.98902	1	17386	0	-0.831
TOPBP1	4	0.011031	0.036692	0.34679	1998	3	-1.3941	0.96724	0.96725	1	16778	0	-1.3941
ECEL1	4	0.011045	0.036737	0.347047	1999	4	-0.81547	0.98895	0.98895	1	17385	0	-0.81547
[truncated: 16,885 more rows]

## Sheet: BC-2
id	num	neg|score	neg|p-value	neg|fdr	neg|rank	neg|goodsgrna	neg|lfc	pos|score	pos|p-value	pos|fdr	pos|rank	pos|goodsgrna	pos|lfc
RPL31	4	3.765e-10	2.6215e-07	0.000291	1	4	-5.5907	1	1	1	18884	0	-5.5907
HSPA5	4	9.8155e-10	2.6215e-07	0.000291	2	4	-3.9107	1	1	1	18883	0	-3.9107
PRMT1	4	1.1917e-09	2.6215e-07	0.000291	3	4	-5.2478	1	1	1	18882	0	-5.2478
RPS16	4	1.4235e-09	2.6215e-07	0.000291	4	4	-2.9937	0.99943	0.99945	1	18315	0	-2.9937
PGAM1	4	2.9121e-09	2.6215e-07	0.000291	5	4	-2.6077	1	1	1	18881	0	-2.6077
AP2M1	4	1.8599e-08	2.6215e-07	0.000291	6	4	-3.4964	1	1	1	18880	0	-3.4964
ANAPC11	4	2.989e-08	2.6215e-07	0.000291	7	4	-2.7901	1	1	1	18879	0	-2.7901
RPS18	4	3.6175e-08	2.6215e-07	0.000291	8	4	-5.0439	1	1	1	18878	0	-5.0439
POLR2K	4	3.6804e-08	2.6215e-07	0.000291	9	4	-4.0653	1	1	1	18877	0	-4.0653
FAU	4	3.911e-08	2.6215e-07	0.000291	10	4	-2.9393	1	1	1	18876	0	-2.9393
RPL17	4	4.2141e-08	2.6215e-07	0.000291	11	4	-5.187	1	1	1	18875	0	-5.187
USP39	4	6.7683e-08	2.6215e-07	0.000291	12	4	-2.9641	1	1	1	18874	0	-2.9641
BUB3	4	8.9751e-08	2.6215e-07	0.000291	13	4	-3.7957	1	1	1	18873	0	-3.7957
HSPA8	4	9.169e-08	2.6215e-07	0.000291	14	4	-4.0188	1	1	1	18872	0	-4.0188
ALAS1	4	1.0186e-07	2.6215e-07	0.000291	15	4	-3.3803	1	1	1	18871	0	-3.3803
NAA10	4	1.0678e-07	2.6215e-07	0.000291	16	4	-3.3217	1	1	1	18870	0	-3.3217
RPL8	4	1.1123e-07	2.6215e-07	0.000291	17	4	-6.2535	1	1	1	18869	0	-6.2535
RPL6	4	1.1512e-07	5.2431e-07	0.00055	18	4	-3.2948	1	1	1	18787	0	-3.2948
RPLP0	4	1.4935e-07	7.8646e-07	0.000675	19	4	-4.3247	1	1	1	18868	0	-4.3247
RPS8	4	1.653e-07	7.8646e-07	0.000675	20	4	-5.5129	1	1	1	18867	0	-5.5129
MTHFD1	4	1.8156e-07	7.8646e-07	0.000675	21	4	-3.7987	1	1	1	18861	0	-3.7987
RPL23A	4	2.0213e-07	7.8646e-07	0.000675	22	4	-3.8584	1	1	1	18866	0	-3.8584
CIAO1	4	2.2474e-07	1.3108e-06	0.000884	23	4	-4.0741	1	1	1	18865	0	-4.0741
RPL19	4	2.2529e-07	1.3108e-06	0.000884	24	4	-3.2079	1	1	1	18864	0	-3.2079
LSM2	4	2.4567e-07	1.3108e-06	0.000884	25	4	-4.3306	1	1	1	18863	0	-4.3306
SMU1	4	2.4979e-07	1.3108e-06	0.000884	26	4	-3.735	1	1	1	18862	0	-3.735
EIF2B3	4	2.5293e-07	1.3108e-06	0.000884	27	4	-3.3592	1	1	1	18823	0	-3.3592
ATP6V0B	4	2.8139e-07	1.3108e-06	0.000884	28	4	-5.354	1	1	1	18860	0	-5.354
AK2	4	3.0819e-07	1.8351e-06	0.001195	29	4	-4.2801	1	1	1	18859	0	-4.2801
EIF6	4	3.6915e-07	2.0972e-06	0.00131	30	4	-3.1024	1	0.99999	1	18774	0	-3.1024
TRMT112	4	3.8559e-07	2.3594e-06	0.00131	31	4	-4.9059	0.99999	0.99999	1	18745	0	-4.9059
PRELID1	4	4.1124e-07	2.3594e-06	0.00131	32	4	-2.2799	1	1	1	18858	0	-2.2799
MCL1	4	5.4989e-07	2.3594e-06	0.00131	33	4	-3.5216	1	1	1	18857	0	-3.5216
CCND2	4	5.7312e-07	2.3594e-06	0.00131	34	4	-3.5028	1	0.99999	1	18777	0	-3.5028
EXOSC4	4	6.692e-07	2.8837e-06	0.001396	35	4	-2.9305	1	1	1	18802	0	-2.9305
PSMA5	4	6.7864e-07	2.8837e-06	0.001396	36	4	-2.7961	1	1	1	18856	0	-2.7961
MARCH5	4	7.2488e-07	2.8837e-06	0.001396	37	4	-3.4713	1	1	1	18855	0	-3.4713
UQCRC1	4	7.5157e-07	2.8837e-06	0.001396	38	4	-2.244	1	1	1	18854	0	-2.244
RPL35A	4	8.4048e-07	2.8837e-06	0.001396	39	4	-2.4338	1	1	1	18853	0	-2.4338
RUVBL2	4	9.5798e-07	3.408e-06	0.001493	40	4	-4.8845	1	1	1	18852	0	-4.8845
RPS4X	4	1.043e-06	3.9323e-06	0.001493	41	4	-5.3482	1	0.99999	1	18783	0	-5.3482
SPDYE6	4	1.0679e-06	3.9323e-06	0.001493	42	4	-3.0024	1	1	1	18851	0	-3.0024
TAF1C	4	1.0785e-06	3.9323e-06	0.001493	43	4	-2.6595	1	1	1	18850	0	-2.6595
PRIM1	4	1.0874e-06	3.9323e-06	0.001493	44	4	-2.7093	1	1	1	18849	0	-2.7093
SNRPD3	4	1.1199e-06	4.4566e-06	0.001493	45	4	-4.9484	1	1	1	18848	0	-4.9484
FBL	4	1.1382e-06	4.4566e-06	0.001493	46	4	-3.7519	1	1	1	18847	0	-3.7519
RPL13	4	1.1531e-06	4.4566e-06	0.001493	47	4	-4.4341	1	1	1	18846	0	-4.4341
ELAC2	4	1.2096e-06	4.4566e-06	0.001493	48	3	-2.7295	0.16065	0.3135	0.947166	6246	1	-2.7295
ORAOV1	4	1.2197e-06	4.4566e-06	0.001493	49	4	-4.646	1	1	1	18845	0	-4.646
PSMA6	4	1.2275e-06	4.4566e-06	0.001493	50	4	-5.2343	1	1	1	18844	0	-5.2343
RPL7	4	1.2314e-06	4.4566e-06	0.001493	51	4	-3.7342	1	1	1	18843	0	-3.7342
PPP1R10	4	1.2591e-06	4.4566e-06	0.001493	52	4	-3.4805	1	1	1	18842	0	-3.4805
PTPMT1	4	1.2811e-06	4.4566e-06	0.001493	53	4	-3.261	1	1	1	18841	0	-3.261
IMP3	4	1.2832e-06	4.4566e-06	0.001493	54	4	-3.1896	1	1	1	18840	0	-3.1896
INTS1	4	1.2862e-06	4.4566e-06	0.001493	55	4	-5.6457	1	1	1	18839	0	-5.6457
WDR18	4	1.3701e-06	4.9809e-06	0.001493	56	4	-2.7455	1	1	1	18838	0	-2.7455
PSMG3	4	1.4537e-06	4.9809e-06	0.001493	57	4	-4.2925	1	1	1	18837	0	-4.2925
VCP	4	1.5145e-06	4.9809e-06	0.001493	58	4	-3.1949	1	1	1	18836	0	-3.1949
RPS23	4	1.5181e-06	4.9809e-06	0.001493	59	4	-4.4444	0.99996	0.99996	1	18628	0	-4.4444
GNL3	4	1.5225e-06	4.9809e-06	0.001493	60	4	-4.051	1	1	1	18835	0	-4.051
SLMO2	4	1.5387e-06	4.9809e-06	0.001493	61	4	-3.5036	1	1	1	18834	0	-3.5036
CARS	4	1.5515e-06	4.9809e-06	0.001493	62	4	-2.9849	0.99999	0.99999	1	18751	0	-2.9849
NDC1	4	1.5596e-06	4.9809e-06	0.001493	63	4	-1.9233	1	1	1	18833	0	-1.9233
HMGCS1	4	1.7236e-06	5.5052e-06	0.001624	64	4	-3.9399	1	1	1	18832	0	-3.9399
DPH3	4	1.735e-06	6.0295e-06	0.00165	65	4	-2.5218	1	1	1	18831	0	-2.5218
IARS2	4	1.8042e-06	6.0295e-06	0.00165	66	4	-4.289	0.98641	0.98637	1	17500	0	-4.289
DOHH	4	1.8044e-06	6.0295e-06	0.00165	67	4	-1.8374	1	1	1	18830	0	-1.8374
NR2C2AP	4	1.8412e-06	6.0295e-06	0.00165	68	4	-3.3613	1	1	1	18829	0	-3.3613
ATP7A	4	1.8571e-06	6.0295e-06	0.00165	69	4	-1.8441	1	1	1	18828	0	-1.8441
AQR	4	1.9274e-06	6.5538e-06	0.001695	70	4	-3.2057	1	1	1	18827	0	-3.2057
FDX1L	4	1.9716e-06	6.5538e-06	0.001695	71	4	-5.0667	1	1	1	18826	0	-5.0667
ERCC2	4	1.9744e-06	6.5538e-06	0.001695	72	4	-3.4408	1	1	1	18825	0	-3.4408
PHB	4	1.9772e-06	6.5538e-06	0.001695	73	4	-3.5528	1	1	1	18824	0	-3.5528
CENPM	4	2.2318e-06	7.6024e-06	0.001841	74	4	-4.1807	1	1	1	18822	0	-4.1807
RPS5	4	2.2404e-06	7.6024e-06	0.001841	75	4	-3.379	0.99474	0.99476	1	17859	0	-3.379
CDC73	4	2.3124e-06	7.6024e-06	0.001841	76	4	-1.6509	1	1	1	18821	0	-1.6509
GAPDH	4	2.3266e-06	7.6024e-06	0.001841	77	4	-4.472	1	1	1	18820	0	-4.472
MFN2	4	2.3408e-06	7.6024e-06	0.001841	78	4	-3.4265	1	1	1	18819	0	-3.4265
DDX54	4	2.4472e-06	8.1267e-06	0.001849	79	4	-3.6572	1	1	1	18818	0	-3.6572
NAPA	4	2.4505e-06	8.1267e-06	0.001849	80	4	-3.0751	1	1	1	18817	0	-3.0751
ASH2L	4	2.4855e-06	8.1267e-06	0.001849	81	4	-4.1107	1	1	1	18803	0	-4.1107
ATP6AP1	4	2.4901e-06	8.1267e-06	0.001849	82	4	-4.4136	1	1	1	18816	0	-4.4136
POLR2L	4	2.5947e-06	8.1267e-06	0.001849	83	4	-3.1016	1	1	1	18815	0	-3.1016
EIF3B	4	2.6709e-06	8.651e-06	0.001945	84	4	-2.89	1	1	1	18814	0	-2.89
RPL26	4	2.8503e-06	1.0224e-05	0.002245	85	4	-3.8491	1	1	1	18813	0	-3.8491
NAA50	4	2.854e-06	1.0224e-05	0.002245	86	4	-4.3289	1	1	1	18812	0	-4.3289
ALDOA	4	2.9964e-06	1.1273e-05	0.002304	87	4	-2.1277	1	1	1	18811	0	-2.1277
ARMC7	4	3.0618e-06	1.1797e-05	0.002304	88	4	-3.1956	1	1	1	18810	0	-3.1956
PPP4C	4	3.1204e-06	1.1797e-05	0.002304	89	4	-2.7027	1	1	1	18809	0	-2.7027
RPP21	4	3.1248e-06	1.1797e-05	0.002304	90	4	-3.1257	0.99996	0.99996	1	18633	0	-3.1257
GBF1	4	3.1758e-06	1.1797e-05	0.002304	91	4	-1.9161	1	1	1	18808	0	-1.9161
GARS	4	3.234e-06	1.1797e-05	0.002304	92	4	-3.1408	1	1	1	18807	0	-3.1408
CPSF3L	4	3.2767e-06	1.1797e-05	0.002304	93	4	-3.9125	1	1	1	18806	0	-3.9125
MRPL4	4	3.3342e-06	1.2321e-05	0.002304	94	4	-3.8055	1	1	1	18805	0	-3.8055
CCT7	4	3.3383e-06	1.2321e-05	0.002304	95	4	-3.2717	1	1	1	18804	0	-3.2717
PSMB4	4	3.4388e-06	1.2321e-05	0.002304	96	4	-2.9662	1	1	1	18801	0	-2.9662
CTC1	4	3.4451e-06	1.2321e-05	0.002304	97	4	-2.7838	1	1	1	18800	0	-2.7838
MRPL17	4	3.4557e-06	1.2321e-05	0.002304	98	4	-2.2597	1	1	1	18799	0	-2.2597
CLTC	4	3.5762e-06	1.2321e-05	0.002304	99	4	-2.7737	1	1	1	18798	0	-2.7737
SRSF1	4	3.5937e-06	1.2321e-05	0.002304	100	4	-4.2411	1	1	1	18797	0	-4.2411
MBD3L3	4	3.598e-06	1.2321e-05	0.002304	101	4	-2.1572	1	1	1	18796	0	-2.1572
SAMM50	4	3.6464e-06	1.2845e-05	0.002378	102	4	-3.9281	1	1	1	18795	0	-3.9281
ITPK1	4	3.7447e-06	1.337e-05	0.002451	103	4	-2.1468	1	1	1	18794	0	-2.1468
IPO13	4	3.8726e-06	1.4418e-05	0.002521	104	4	-2.2067	1	1	1	18793	0	-2.2067
SNRNP25	4	3.9098e-06	1.4418e-05	0.002521	105	4	-2.7429	1	1	1	18792	0	-2.7429
EIF4E	4	3.9472e-06	1.4418e-05	0.002521	106	4	-2.7819	1	1	1	18791	0	-2.7819
DDX10	4	3.9566e-06	1.4418e-05	0.002521	107	4	-3.3521	1	1	1	18790	0	-3.3521
KIF11	4	3.966e-06	1.4418e-05	0.002521	108	4	-4.5397	1	1	1	18789	0	-4.5397
TICRR	4	4.0898e-06	1.4943e-05	0.002542	109	4	-4.0172	1	1	1	18788	0	-4.0172
HUWE1	4	4.1383e-06	1.4943e-05	0.002542	110	4	-2.2458	1	1	1	18786	0	-2.2458
EIF2B4	4	4.1577e-06	1.4943e-05	0.002542	111	4	-2.7101	1	1	1	18785	0	-2.7101
GINS2	4	4.3211e-06	1.5991e-05	0.002696	112	4	-3.3719	1	0.99999	1	18784	0	-3.3719
TRAPPC4	4	4.3918e-06	1.6516e-05	0.002736	113	4	-4.3065	1	0.99999	1	18782	0	-4.3065
UBL5	4	4.4275e-06	1.6516e-05	0.002736	114	4	-2.8672	1	0.99999	1	18781	0	-2.8672
LUC7L3	4	4.4841e-06	1.704e-05	0.002798	115	4	-2.7858	1	0.99999	1	18780	0	-2.7858
CTR9	4	4.6516e-06	1.8089e-05	0.002945	116	4	-2.024	1	0.99999	1	18779	0	-2.024
TERF2	4	4.7506e-06	1.8613e-05	0.002987	117	3	-3.2576	0.34163	0.49103	1	8991	1	-3.2576
RPS15A	4	4.8183e-06	1.9137e-05	0.002987	118	4	-3.3529	1	0.99999	1	18778	0	-3.3529
FNTA	4	4.8621e-06	1.9137e-05	0.002987	119	4	-2.7932	1	0.99999	1	18776	0	-2.7932
DHX15	4	4.8841e-06	1.9137e-05	0.002987	120	4	-3.2159	1	0.99999	1	18775	0	-3.2159
KPNB1	4	4.9338e-06	1.9137e-05	0.002987	121	4	-4.4905	1	0.99999	1	18773	0	-4.4905
PSMD7	4	5.0232e-06	1.9661e-05	0.002994	122	4	-3.2585	0.99999	0.99999	1	18772	0	-3.2585
ARPC4	4	5.2287e-06	1.9661e-05	0.002994	123	4	-2.1954	0.99999	0.99999	1	18771	0	-2.1954
GOLGA6L4	4	5.281e-06	1.9661e-05	0.002994	124	4	-2.4982	0.99999	0.99999	1	18770	0	-2.4982
DHFR	4	5.3279e-06	2.0186e-05	0.003025	125	4	-4.8342	0.99999	0.99999	1	18769	0	-4.8342
NSF	4	5.5153e-06	2.0186e-05	0.003025	126	4	-2.3122	0.99583	0.99581	1	17916	0	-2.3122
PSMD12	4	5.7544e-06	2.1234e-05	0.003157	127	4	-2.6358	0.99999	0.99999	1	18768	0	-2.6358
TRRAP	4	5.7731e-06	2.1759e-05	0.003185	128	4	-1.9123	0.99999	0.99999	1	18767	0	-1.9123
UBE2I	4	5.8138e-06	2.1759e-05	0.003185	129	4	-3.0072	0.99999	0.99999	1	18766	0	-3.0072
FAM231A	4	5.9467e-06	2.2807e-05	0.003238	130	4	-2.0545	0.99999	0.99999	1	18765	0	-2.0545
TCP1	4	6.014e-06	2.2807e-05	0.003238	131	4	-4.0818	0.99999	0.99999	1	18764	0	-4.0818
RPS13	4	6.0688e-06	2.2807e-05	0.003238	132	4	-4.3992	0.99999	0.99999	1	18763	0	-4.3992
MDM2	4	6.0948e-06	2.2807e-05	0.003238	133	4	-2.1957	0.99999	0.99999	1	18762	0	-2.1957
RPL10	4	6.183e-06	2.3332e-05	0.003264	134	4	-4.5663	0.99999	0.99999	1	18761	0	-4.5663
CCT4	4	6.3255e-06	2.3332e-05	0.003264	135	4	-2.8908	0.99999	0.99999	1	18760	0	-2.8908
RPL5	4	6.4878e-06	2.438e-05	0.003385	136	3	-3.1993	0.95362	0.95365	1	16661	0	-3.1993
GTF2H1	4	6.604e-06	2.5429e-05	0.003505	137	4	-1.6474	0.99999	0.99999	1	18759	0	-1.6474
GNB2L1	4	6.6838e-06	2.6477e-05	0.003597	138	4	-3.1224	0.99999	0.99999	1	18758	0	-3.1224
TRAPPC11	4	6.7307e-06	2.6477e-05	0.003597	139	4	-2.6074	0.99326	0.99329	1	17775	0	-2.6074
PSMA7	4	6.8988e-06	2.7002e-05	0.003616	140	4	-3.958	0.99999	0.99999	1	18757	0	-3.958
PSMA4	4	7.0136e-06	2.7002e-05	0.003616	141	4	-4.2878	0.99999	0.99999	1	18756	0	-4.2878
ZPR1	4	7.2402e-06	2.805e-05	0.00373	142	4	-2.9679	0.99999	0.99999	1	18755	0	-2.9679
NOL10	4	7.3443e-06	2.8837e-05	0.003808	143	4	-4.1702	0.99999	0.99999	1	18754	0	-4.1702
SF3B2	4	7.3818e-06	2.9099e-05	0.003816	144	4	-2.4345	0.99999	0.99999	1	18753	0	-2.4345
MAK16	4	7.6326e-06	3.0148e-05	0.003926	145	4	-2.574	0.99999	0.99999	1	18752	0	-2.574
SUPT5H	4	7.7998e-06	3.1196e-05	0.004008	146	4	-3.4363	0.99921	0.99921	1	18267	0	-3.4363
RPS27A	4	7.8189e-06	3.1196e-05	0.004008	147	4	-3.8069	0.99999	0.99999	1	18750	0	-3.8069
TAZ	4	7.953e-06	3.172e-05	0.004047	148	4	-2.4398	0.99999	0.99999	1	18749	0	-2.4398
SNRPF	4	8.129e-06	3.2507e-05	0.00412	149	4	-3.6699	0.99999	0.99999	1	18748	0	-3.6699
RPF2	4	8.4649e-06	3.3293e-05	0.004191	150	4	-2.5414	0.99999	0.99999	1	18747	0	-2.5414
EFTUD2	4	8.5651e-06	3.3818e-05	0.004201	151	4	-4.0717	0.99999	0.99999	1	18746	0	-4.0717
ORC6	4	8.7171e-06	3.3818e-05	0.004201	152	4	-3.4999	0.99999	0.99999	1	18744	0	-3.4999
RPS12	4	8.9762e-06	3.4866e-05	0.004257	153	4	-4.6355	0.99996	0.99996	1	18639	0	-4.6355
ZWINT	4	9.2297e-06	3.5391e-05	0.004257	154	4	-2.5203	0.99999	0.99999	1	18743	0	-2.5203
MRPS12	4	9.283e-06	3.5391e-05	0.004257	155	4	-2.0504	0.99999	0.99999	1	18742	0	-2.0504
COPS2	4	9.3053e-06	3.5391e-05	0.004257	156	4	-5.4728	0.99999	0.99999	1	18741	0	-5.4728
NOP58	4	9.3366e-06	3.5391e-05	0.004257	157	4	-3.2514	0.99999	0.99999	1	18740	0	-3.2514
RPS11	4	9.4174e-06	3.5915e-05	0.004293	158	4	-2.7647	0.99999	0.99999	1	18739	0	-2.7647
DNA2	4	9.5169e-06	3.6439e-05	0.004309	159	4	-3.2481	0.99999	0.99999	1	18738	0	-3.2481
HARS	4	9.7229e-06	3.6964e-05	0.004309	160	4	-4.0131	0.99999	0.99999	1	18737	0	-4.0131
VARS	4	9.7413e-06	3.6964e-05	0.004309	161	4	-4.4738	0.99999	0.99999	1	18736	0	-4.4738
CDC37	4	9.7737e-06	3.6964e-05	0.004309	162	4	-4.1882	0.99999	0.99999	1	18735	0	-4.1882
RPL17-C18orf32	4	9.9934e-06	3.8012e-05	0.004321	163	4	-3.4495	0.99457	0.9946	1	17852	0	-3.4495
PRMT5	4	1.0007e-05	3.8012e-05	0.004321	164	4	-2.7895	0.99999	0.99999	1	18734	0	-2.7895
KMT2B	4	1.0245e-05	3.9585e-05	0.004321	165	4	-1.8697	0.99999	0.99999	1	18733	0	-1.8697
NDUFS5	4	1.0274e-05	3.9585e-05	0.004321	166	4	-2.3098	0.99999	0.99999	1	18732	0	-2.3098
VPS25	4	1.0293e-05	3.9585e-05	0.004321	167	4	-5.1203	0.99999	0.99999	1	18731	0	-5.1203
ADSL	4	1.0312e-05	3.9585e-05	0.004321	168	4	-4.4803	0.99999	0.99999	1	18730	0	-4.4803
NAE1	4	1.0361e-05	3.9585e-05	0.004321	169	4	-1.917	0.99999	0.99999	1	18729	0	-1.917
MAT2A	4	1.039e-05	3.9585e-05	0.004321	170	4	-3.7062	0.99999	0.99999	1	18728	0	-3.7062
UBA1	4	1.04e-05	3.9585e-05	0.004321	171	4	-3.6438	0.99999	0.99999	1	18727	0	-3.6438
NARFL	4	1.0409e-05	3.9585e-05	0.004321	172	4	-2.3249	0.99999	0.99999	1	18726	0	-2.3249
LSM4	4	1.0458e-05	3.9585e-05	0.004321	173	4	-3.925	0.99992	0.99992	1	18575	0	-3.925
RPS19	4	1.093e-05	4.1158e-05	0.004441	174	4	-5.3962	0.99999	0.99998	1	18722	0	-5.3962
EIF2S3	4	1.0974e-05	4.1158e-05	0.004441	175	4	-3.6577	0.99999	0.99999	1	18725	0	-3.6577
CCT3	4	1.1136e-05	4.1682e-05	0.004472	176	4	-4.0724	0.99999	0.99999	1	18724	0	-4.0724
CDT1	4	1.1208e-05	4.2207e-05	0.004503	177	4	-2.0117	0.99999	0.99999	1	18723	0	-2.0117
NELFB	4	1.2172e-05	4.9547e-05	0.005256	178	4	-2.3059	0.99999	0.99998	1	18721	0	-2.3059
BRIX1	4	1.2458e-05	5.112e-05	0.005354	179	4	-1.7718	0.99999	0.99998	1	18720	0	-1.7718
PRPF19	4	1.2563e-05	5.1644e-05	0.005354	180	4	-2.966	0.99997	0.99996	1	18649	0	-2.966
HSPD1	4	1.2716e-05	5.2168e-05	0.005354	181	4	-5.0084	0.99999	0.99998	1	18719	0	-5.0084
HNRNPC	4	1.2733e-05	5.2168e-05	0.005354	182	4	-3.3684	0.99841	0.99839	1	18132	0	-3.3684
DTYMK	4	1.2738e-05	5.2168e-05	0.005354	183	4	-2.2298	0.99999	0.99998	1	18718	0	-2.2298
SRP54	4	1.2863e-05	5.2168e-05	0.005354	184	4	-2.9642	0.99999	0.99998	1	18717	0	-2.9642
RPS17	4	1.2977e-05	5.2693e-05	0.005379	185	4	-3.5555	0.99999	0.99998	1	18716	0	-3.5555
ATP6V0C	4	1.3243e-05	5.3741e-05	0.005456	186	4	-2.3607	0.99999	0.99998	1	18715	0	-2.3607
ALG1	4	1.3893e-05	5.5314e-05	0.005492	187	4	-2.9286	0.99586	0.99584	1	17917	0	-2.9286
SF3B5	4	1.3983e-05	5.5314e-05	0.005492	188	4	-4.1762	0.99989	0.99989	1	18537	0	-4.1762
MCM7	4	1.4162e-05	5.5314e-05	0.005492	189	4	-2.5114	0.99999	0.99998	1	18714	0	-2.5114
LAMTOR2	4	1.4235e-05	5.5839e-05	0.005492	190	4	-1.8605	0.99999	0.99998	1	18713	0	-1.8605
ORC1	4	1.4321e-05	5.5839e-05	0.005492	191	4	-2.7749	0.99999	0.99998	1	18712	0	-2.7749
KARS	4	1.4445e-05	5.5839e-05	0.005492	192	4	-2.224	0.99999	0.99998	1	18711	0	-2.224
SNRPG	4	1.4588e-05	5.6363e-05	0.005515	193	4	-2.3804	0.99999	0.99998	1	18710	0	-2.3804
PES1	4	1.4779e-05	5.6887e-05	0.005537	194	4	-2.1338	0.99956	0.99956	1	18352	0	-2.1338
DHPS	4	1.514e-05	5.7936e-05	0.005554	195	4	-2.2653	0.99998	0.99998	1	18709	0	-2.2653
GPN1	4	1.5153e-05	5.7936e-05	0.005554	196	4	-2.2079	0.99998	0.99998	1	18708	0	-2.2079
ZNHIT2	4	1.5218e-05	5.7936e-05	0.005554	197	4	-4.5769	0.99998	0.99998	1	18707	0	-4.5769
FCF1	4	1.5282e-05	5.846e-05	0.005576	198	4	-3.3145	0.99998	0.99998	1	18706	0	-3.3145
RPS3A	4	1.5373e-05	5.8984e-05	0.005597	199	4	-2.4993	0.99998	0.99998	1	18705	0	-2.4993
EIF4A1	4	1.6209e-05	6.4227e-05	0.006064	200	4	-3.4761	0.99998	0.99998	1	18704	0	-3.4761
RSL24D1	4	1.6605e-05	6.6325e-05	0.006219	201	4	-2.6289	0.99998	0.99998	1	18703	0	-2.6289
EXOSC6	4	1.6745e-05	6.6849e-05	0.006219	202	3	-2.6758	0.59936	0.68159	1	12033	1	-2.6758
RPS6	4	1.6827e-05	6.6849e-05	0.006219	203	4	-3.427	0.99978	0.99978	1	18461	0	-3.427
IARS	4	1.6939e-05	6.7373e-05	0.006237	204	4	-3.9359	0.99998	0.99998	1	18702	0	-3.9359
GMPS	4	1.7434e-05	7.0519e-05	0.006464	205	4	-3.1847	0.99998	0.99998	1	18701	0	-3.1847
NHP2	4	1.7491e-05	7.0519e-05	0.006464	206	4	-3.2645	0.99998	0.99998	1	18700	0	-3.2645
WDHD1	4	1.779e-05	7.1568e-05	0.006529	207	4	-4.0601	0.99271	0.99274	1	17751	0	-4.0601
AP2S1	4	1.7852e-05	7.2092e-05	0.006545	208	4	-1.8413	0.99998	0.99998	1	18699	0	-1.8413
MBD3L5	4	1.8219e-05	7.3141e-05	0.006562	209	4	-1.8229	0.99998	0.99998	1	18698	0	-1.8229
DNAJC17	4	1.8263e-05	7.3665e-05	0.006562	210	4	-1.9913	0.99971	0.99971	1	18414	0	-1.9913
PCNA	4	1.8711e-05	7.4189e-05	0.006562	211	4	-3.294	0.99998	0.99998	1	18697	0	-3.294
COPS4	4	1.8757e-05	7.4189e-05	0.006562	212	4	-3.3021	0.99998	0.99998	1	18696	0	-3.3021
STX4	4	1.8966e-05	7.4714e-05	0.006562	213	4	-3.449	0.99985	0.99985	1	18502	0	-3.449
UHRF1	4	1.8992e-05	7.4714e-05	0.006562	214	4	-2.6242	0.99998	0.99998	1	18695	0	-2.6242
ELAVL1	4	1.9061e-05	7.4714e-05	0.006562	215	4	-1.4119	0.99998	0.99998	1	18694	0	-1.4119
TRMT5	4	1.9189e-05	7.5238e-05	0.006578	216	4	-2.5499	0.99856	0.99852	1	18151	0	-2.5499
BUD31	4	1.9508e-05	7.6286e-05	0.006639	217	4	-2.3238	0.99998	0.99998	1	18693	0	-2.3238
POLR3K	4	1.9916e-05	7.9432e-05	0.006881	218	4	-3.9076	0.99975	0.99975	1	18442	0	-3.9076
GGPS1	4	2.0137e-05	8.0481e-05	0.00694	219	4	-2.4577	0.99998	0.99998	1	18692	0	-2.4577
TUT1	4	2.0587e-05	8.2578e-05	0.007088	220	4	-2.7386	0.99998	0.99998	1	18691	0	-2.7386
MRPL47	4	2.0782e-05	8.3627e-05	0.007146	221	4	-2.2092	0.99998	0.99998	1	18690	0	-2.2092
C7orf26	4	2.088e-05	8.4151e-05	0.007158	222	4	-1.8487	0.99998	0.99998	1	18689	0	-1.8487
DHX35	4	2.1426e-05	8.6773e-05	0.007315	223	4	-2.405	0.99998	0.99998	1	18688	0	-2.405
ACTR2	4	2.1519e-05	8.6773e-05	0.007315	224	3	-2.3058	0.97372	0.97383	1	17135	0	-2.3058
TPI1	4	2.1702e-05	8.7297e-05	0.007327	225	4	-1.6799	0.99998	0.99998	1	18687	0	-1.6799
IPPK	4	2.1965e-05	8.8346e-05	0.007382	226	4	-1.8623	0.99998	0.99998	1	18686	0	-1.8623
HSPA9	4	2.2056e-05	8.887e-05	0.007393	227	4	-2.5209	0.99994	0.99994	1	18602	0	-2.5209
SLC19A1	4	2.2303e-05	9.0443e-05	0.007404	228	4	-2.8493	0.99991	0.99991	1	18556	0	-2.8493
CLP1	4	2.2462e-05	9.0967e-05	0.007404	229	4	-2.634	0.99998	0.99998	1	18685	0	-2.634
TARS2	4	2.2479e-05	9.0967e-05	0.007404	230	4	-3.6975	0.99998	0.99998	1	18684	0	-3.6975
RNASEK	4	2.2543e-05	9.0967e-05	0.007404	231	3	-1.8264	0.21584	0.36771	0.98152	7067	1	-1.8264
MYB	4	2.2583e-05	9.0967e-05	0.007404	232	4	-2.5186	0.99998	0.99998	1	18683	0	-2.5186
CENPA	4	2.2862e-05	9.2016e-05	0.007458	233	4	-3.6569	0.99998	0.99998	1	18682	0	-3.6569
PCYT2	4	2.3073e-05	9.3064e-05	0.00751	234	4	-2.0121	0.99998	0.99998	1	18681	0	-2.0121
MRPL41	4	2.3464e-05	9.5161e-05	0.007589	235	4	-1.4704	0.99998	0.99998	1	18680	0	-1.4704
SACM1L	4	2.3482e-05	9.5161e-05	0.007589	236	4	-1.9896	0.99998	0.99998	1	18679	0	-1.9896
RPA1	4	2.3769e-05	9.621e-05	0.007589	237	4	-2.21	0.99998	0.99998	1	18678	0	-2.21
SNRNP200	4	2.3859e-05	9.6734e-05	0.007589	238	4	-2.2895	0.99998	0.99998	1	18677	0	-2.2895
NDUFA1	4	2.4004e-05	9.7259e-05	0.007589	239	4	-2.0588	0.99998	0.99998	1	18676	0	-2.0588
DCTN5	4	2.4095e-05	9.7259e-05	0.007589	240	4	-3.4833	0.99998	0.99998	1	18675	0	-3.4833
HSPE1	4	2.4278e-05	9.7259e-05	0.007589	241	4	-4.3511	0.99998	0.99998	1	18674	0	-4.3511
AHCY	4	2.4291e-05	9.7259e-05	0.007589	242	3	-5.302	0.82396	0.82536	1	14318	1	-5.302
NAA60	4	2.4684e-05	9.8832e-05	0.007596	243	4	-2.399	0.99998	0.99998	1	18673	0	-2.399
WDR24	4	2.4745e-05	9.8832e-05	0.007596	244	4	-2.1728	0.99914	0.99914	1	18246	0	-2.1728
SMARCA5	4	2.5001e-05	9.9356e-05	0.007596	245	4	-1.6813	0.99997	0.99998	1	18672	0	-1.6813
TOP2A	4	2.5189e-05	9.9356e-05	0.007596	246	4	-4.0235	0.99997	0.99998	1	18671	0	-4.0235
NOB1	4	2.5208e-05	9.9356e-05	0.007596	247	4	-1.49	0.99997	0.99998	1	18670	0	-1.49
EEF2	4	2.5663e-05	0.00010145	0.007694	248	4	-3.6233	0.99997	0.99998	1	18669	0	-3.6233
NXF1	4	2.5721e-05	0.00010145	0.007694	249	3	-2.0394	0.24685	0.39808	1	7509	1	-2.0394
MRPS34	4	2.6067e-05	0.0001025	0.007712	250	4	-2.3976	0.99997	0.99997	1	18668	0	-2.3976
ATP6V1B2	4	2.6125e-05	0.0001025	0.007712	251	4	-4.2949	0.99997	0.99997	1	18667	0	-4.2949
NEDD8	4	2.6671e-05	0.00010565	0.007917	252	4	-2.9154	0.99714	0.99714	1	18001	0	-2.9154
CYCS	4	2.7176e-05	0.00010774	0.008042	253	4	-2.8829	0.99996	0.99996	1	18644	0	-2.8829
PSMC2	4	2.7286e-05	0.00010827	0.008049	254	4	-2.1806	0.99997	0.99997	1	18666	0	-2.1806
LUC7L2	4	2.779e-05	0.00010984	0.00813	255	4	-1.7058	0.99997	0.99997	1	18665	0	-1.7058
WDR3	4	2.8198e-05	0.00011141	0.00813	256	4	-2.6336	0.99997	0.99997	1	18664	0	-2.6336
GNL3L	4	2.8362e-05	0.00011141	0.00813	257	4	-1.6879	0.99997	0.99997	1	18663	0	-1.6879
RBM17	4	2.8444e-05	0.00011141	0.00813	258	4	-1.6775	0.99997	0.99997	1	18662	0	-1.6775
MARS	4	2.8672e-05	0.00011194	0.00813	259	4	-3.5867	0.99997	0.99997	1	18661	0	-3.5867
EEF1G	4	2.8788e-05	0.00011194	0.00813	260	3	-3.0132	0.8638	0.8637	1	14961	0	-3.0132
POP5	4	2.9597e-05	0.00011561	0.008365	261	4	-2.3986	0.99997	0.99997	1	18660	0	-2.3986
MIS18BP1	4	3.0849e-05	0.00011823	0.008522	262	4	-3.3923	0.99997	0.99997	1	18659	0	-3.3923
ASNA1	4	3.1457e-05	0.00011928	0.008565	263	4	-2.3889	0.99997	0.99997	1	18658	0	-2.3889
ZCCHC8	4	3.1624e-05	0.00012085	0.008645	264	4	-1.4906	0.99997	0.99997	1	18657	0	-1.4906
PRPF31	4	3.2551e-05	0.00012557	0.008915	265	4	-1.9869	0.99997	0.99997	1	18656	0	-1.9869
NOP56	4	3.2803e-05	0.00012557	0.008915	266	4	-4.2147	0.99997	0.99997	1	18655	0	-4.2147
OGT	4	3.2941e-05	0.0001261	0.008918	267	4	-2.4258	0.99997	0.99997	1	18654	0	-2.4258
ABCF1	4	3.3322e-05	0.00012662	0.008922	268	4	-2.4422	0.99997	0.99997	1	18653	0	-2.4422
IMPDH2	4	3.3416e-05	0.00012767	0.008936	269	4	-3.5626	0.99708	0.9971	1	17992	0	-3.5626
SOD2	4	3.3591e-05	0.00012819	0.008936	270	4	-3.1678	0.99997	0.99996	1	18652	0	-3.1678
SS18L2	4	3.3806e-05	0.00012872	0.008936	271	4	-4.5244	0.99988	0.99989	1	18527	0	-4.5244
COPE	4	3.3848e-05	0.00012872	0.008936	272	4	-2.8295	0.99997	0.99996	1	18651	0	-2.8295
PSMB7	4	3.4068e-05	0.00012977	0.008976	273	4	-4.3522	0.99972	0.99972	1	18423	0	-4.3522
INTS5	4	3.42e-05	0.00013134	0.009052	274	4	-2.5072	0.99869	0.99866	1	18170	0	-2.5072
RPS10	4	3.4226e-05	0.00013186	0.009055	275	4	-2.1949	0.99997	0.99996	1	18650	0	-2.1949
LOC100507462	4	3.4895e-05	0.00013396	0.009135	276	4	-6.0544	0.99968	0.99967	1	18397	0	-6.0544
NOC4L	4	3.5379e-05	0.00013448	0.009135	277	4	-2.5053	0.99996	0.99996	1	18648	0	-2.5053
IMP4	4	3.5397e-05	0.00013448	0.009135	278	4	-3.2694	0.99991	0.99991	1	18558	0	-3.2694
RPL9	4	3.5938e-05	0.00013815	0.009299	279	3	-2.9431	0.21376	0.36567	0.98152	7034	1	-2.9431
SKP1	4	3.5941e-05	0.00013815	0.009299	280	4	-2.1702	0.99996	0.99996	1	18647	0	-2.1702
MED26	4	3.6138e-05	0.00013868	0.009299	281	4	-2.1981	0.99996	0.99996	1	18646	0	-2.1981
WDR12	4	3.625e-05	0.0001392	0.009299	282	4	-3.0224	0.99996	0.99996	1	18645	0	-3.0224
PSMD3	4	3.6535e-05	0.00013973	0.009299	283	4	-3.2543	0.99996	0.99996	1	18643	0	-3.2543
CCDC94	4	3.6899e-05	0.0001413	0.009299	284	2	-1.3007	0.46858	0.61605	1	11003	2	-1.3007
DKC1	4	3.7011e-05	0.0001413	0.009299	285	4	-2.489	0.99996	0.99996	1	18642	0	-2.489
DUT	4	3.7176e-05	0.00014182	0.009299	286	3	-4.0241	0.86509	0.86501	1	14989	0	-4.0241
SEC13	4	3.7301e-05	0.00014182	0.009299	287	4	-3.0083	0.99996	0.99996	1	18641	0	-3.0083
PLK1	4	3.744e-05	0.00014182	0.009299	288	4	-2.4535	0.99996	0.99996	1	18640	0	-2.4535
PHF5A	4	3.7735e-05	0.00014235	0.009301	289	4	-4.5764	0.99986	0.99986	1	18508	0	-4.5764
POLA2	4	3.8258e-05	0.00014497	0.00944	290	4	-2.503	0.99996	0.99996	1	18638	0	-2.503
EIF3CL	4	3.909e-05	0.00015021	0.009682	291	4	-2.1084	0.99996	0.99996	1	18637	0	-2.1084
CDK1	4	3.93e-05	0.00015021	0.009682	292	4	-1.9023	0.99996	0.99996	1	18636	0	-1.9023
GLRX5	4	3.9405e-05	0.00015074	0.009682	293	4	-2.6829	0.99996	0.99996	1	18635	0	-2.6829
UAP1	4	3.9518e-05	0.00015074	0.009682	294	4	-2.1251	0.99914	0.99913	1	18245	0	-2.1251
POP1	4	3.9683e-05	0.00015126	0.009683	295	4	-1.6635	0.99996	0.99996	1	18634	0	-1.6635
FAM157A	4	4.0015e-05	0.00015336	0.009784	296	4	-2.9583	0.99996	0.99996	1	18632	0	-2.9583
RUVBL1	4	4.0173e-05	0.00015493	0.009786	297	4	-5.0531	0.99992	0.99992	1	18567	0	-5.0531
MRPS16	4	4.0443e-05	0.00015546	0.009786	298	4	-2.3873	0.99996	0.99996	1	18631	0	-2.3873
NIPBL	4	4.0497e-05	0.00015546	0.009786	299	4	-2.0323	0.99996	0.99996	1	18630	0	-2.0323
RPL36	4	4.0821e-05	0.00015598	0.009786	300	4	-3.7312	0.99996	0.99996	1	18629	0	-3.7312
RPS26	4	4.0835e-05	0.00015598	0.009786	301	3	-3.0176	0.9785	0.97863	1	17252	0	-3.0176
ELP5	4	4.1505e-05	0.00016018	0.010016	302	4	-2.6859	0.99383	0.99387	1	17809	0	-2.6859
CIRH1A	4	4.2553e-05	0.00016385	0.010209	303	4	-2.7309	0.99996	0.99996	1	18627	0	-2.7309
RPS21	4	4.2664e-05	0.00016437	0.010209	304	4	-3.3989	0.99996	0.99996	1	18626	0	-3.3989
LSM7	4	4.2692e-05	0.00016489	0.010209	305	4	-2.5949	0.99996	0.99996	1	18625	0	-2.5949
GEMIN8	4	4.4023e-05	0.00016804	0.01037	306	4	-1.9828	0.99996	0.99996	1	18624	0	-1.9828
RPSA	4	4.4686e-05	0.00017014	0.010465	307	4	-5.0109	0.99984	0.99985	1	18497	0	-5.0109
PDRG1	4	4.4889e-05	0.00017119	0.010496	308	4	-2.3451	0.99996	0.99995	1	18623	0	-2.3451
RBM25	4	4.5034e-05	0.00017223	0.010526	309	4	-1.6831	0.99995	0.99995	1	18622	0	-1.6831
FBXW11	4	4.59e-05	0.00017381	0.010583	310	4	-1.7398	0.99995	0.99995	1	18621	0	-1.7398
RPL32	4	4.5995e-05	0.00017433	0.010583	311	4	-4.5108	0.99986	0.99987	1	18512	0	-4.5108
PMPCB	4	4.6075e-05	0.00017486	0.010583	312	3	-2.3483	0.09476	0.20686	0.897316	4353	1	-2.3483
C21orf59	4	4.6151e-05	0.00017643	0.010644	313	4	-2.2605	0.99995	0.99995	1	18620	0	-2.2605
HAUS5	4	4.6748e-05	0.0001801	0.010831	314	4	-1.7895	0.99995	0.99995	1	18619	0	-1.7895
UQCRHL	4	4.7775e-05	0.00018482	0.011045	315	4	-1.7676	0.99995	0.99995	1	18618	0	-1.7676
PSMC3	4	4.7896e-05	0.00018482	0.011045	316	4	-2.2995	0.99995	0.99995	1	18617	0	-2.2995
POLR2G	4	4.8356e-05	0.00018639	0.011103	317	3	-2.3798	0.87082	0.87074	1	15100	0	-2.3798
UXT	4	4.9238e-05	0.00019006	0.011251	318	4	-3.222	0.99995	0.99995	1	18616	0	-3.222
GART	4	4.9313e-05	0.00019006	0.011251	319	4	-2.1976	0.99642	0.99644	1	17944	0	-2.1976
SRSF2	4	5.0624e-05	0.00019688	0.011541	320	3	-5.4967	0.97828	0.97841	1	17250	0	-5.4967
SFPQ	4	5.071e-05	0.0001974	0.011541	321	4	-4.2341	0.99986	0.99986	1	18510	0	-4.2341
PRPF38A	4	5.0795e-05	0.0001974	0.011541	322	4	-4.554	0.99991	0.99991	1	18554	0	-4.554
CDCA8	4	5.1052e-05	0.0001974	0.011541	323	3	-2.5857	0.91176	0.91173	1	15854	0	-2.5857
RPS24	4	5.147e-05	0.00020055	0.011689	324	4	-4.5305	0.99995	0.99995	1	18615	0	-4.5305
WASH1	4	5.1729e-05	0.0002016	0.011714	325	4	-4.7623	0.99995	0.99995	1	18614	0	-4.7623
SKIV2L2	4	5.215e-05	0.00020264	0.011738	326	4	-4.1953	0.99995	0.99994	1	18613	0	-4.1953
RPLP2	4	5.228e-05	0.00020369	0.011763	327	4	-2.4697	0.99995	0.99994	1	18612	0	-2.4697
LRR1	4	5.2394e-05	0.00020527	0.011782	328	4	-2.0619	0.99995	0.99994	1	18611	0	-2.0619
CFLAR	4	5.2574e-05	0.00020527	0.011782	329	4	-2.7402	0.99995	0.99994	1	18610	0	-2.7402
DIMT1	4	5.3215e-05	0.00020789	0.011896	330	4	-4.5432	0.99995	0.99994	1	18609	0	-4.5432
USP37	4	5.3928e-05	0.00021156	0.012063	331	4	-1.8694	0.99995	0.99994	1	18608	0	-1.8694
SNRPD2	4	5.4382e-05	0.00021208	0.012063	332	4	-3.5979	0.99961	0.99961	1	18376	0	-3.5979
PAFAH1B1	4	5.501e-05	0.00021418	0.012096	333	4	-2.4447	0.99981	0.99982	1	18480	0	-2.4447
EXOSC2	4	5.5173e-05	0.0002147	0.012096	334	4	-3.3953	0.99994	0.99994	1	18607	0	-3.3953
TXN	4	5.5241e-05	0.00021523	0.012096	335	4	-4.2055	0.99994	0.99994	1	18606	0	-4.2055
TARDBP	4	5.5377e-05	0.00021523	0.012096	336	4	-2.7704	0.99994	0.99994	1	18605	0	-2.7704
NUP43	4	5.5644e-05	0.00021837	0.012237	337	4	-4.8187	0.99987	0.99987	1	18514	0	-4.8187
YARS2	4	5.6163e-05	0.00022047	0.012318	338	4	-2.6813	0.99994	0.99994	1	18604	0	-2.6813
WDR83	4	5.7167e-05	0.00022519	0.012544	339	4	-2.1822	0.99994	0.99994	1	18603	0	-2.1822
CCDC84	4	5.9358e-05	0.00023515	0.013051	340	4	-1.9226	0.99994	0.99994	1	18601	0	-1.9226
DDX21	4	5.9681e-05	0.00023568	0.013051	341	4	-3.893	0.99994	0.99994	1	18600	0	-3.893
CENPN	4	6.0259e-05	0.00023935	0.013187	342	4	-2.8001	0.99994	0.99994	1	18599	0	-2.8001
MOCS3	4	6.0477e-05	0.00023987	0.013187	343	4	-2.6625	0.99994	0.99994	1	18598	0	-2.6625
PMPCA	4	6.0695e-05	0.00024039	0.013187	344	4	-2.0403	0.99994	0.99994	1	18597	0	-2.0403
PSMD6	4	6.0768e-05	0.00024092	0.013187	345	4	-2.5532	0.99994	0.99994	1	18596	0	-2.5532
RPL7A	4	6.1855e-05	0.00024616	0.013396	346	3	-4.105	0.65064	0.70782	1	12426	1	-4.105
INTS4	4	6.1953e-05	0.00024616	0.013396	347	3	-3.1127	0.96768	0.9677	1	16985	0	-3.1127
PPP2R1A	4	6.2166e-05	0.00024878	0.0135	348	4	-1.8872	0.99994	0.99994	1	18595	0	-1.8872
IRF4	4	6.2681e-05	0.0002514	0.013593	349	3	-4.6264	0.064285	0.15089	0.858334	3317	1	-4.6264
RPL21	4	6.3328e-05	0.00025193	0.013593	350	3	-2.8574	0.97695	0.9771	1	17212	0	-2.8574
COASY	4	6.4423e-05	0.00025822	0.013792	351	4	-2.3412	0.99893	0.99891	1	18205	0	-2.3412
NPIPB3	4	6.4517e-05	0.00025874	0.013792	352	4	-1.5032	0.99994	0.99993	1	18594	0	-1.5032
DMAP1	4	6.4574e-05	0.00025874	0.013792	353	4	-2.0588	0.99994	0.99993	1	18593	0	-2.0588
SNRNP35	4	6.4689e-05	0.00025927	0.013792	354	4	-1.8333	0.99994	0.99993	1	18592	0	-1.8333
DDX20	4	6.4765e-05	0.00025927	0.013792	355	4	-2.3601	0.99994	0.99993	1	18591	0	-2.3601
NIP7	4	6.488e-05	0.00026032	0.013809	356	4	-1.7494	0.99994	0.99993	1	18590	0	-1.7494
SNRPD1	4	6.6241e-05	0.00026399	0.013848	357	3	-2.8691	0.83283	0.83342	1	14443	1	-2.8691
RAD9A	4	6.6309e-05	0.00026399	0.013848	358	4	-2.2568	0.99993	0.99993	1	18589	0	-2.2568
LONP1	4	6.6313e-05	0.00026399	0.013848	359	4	-1.8714	0.99921	0.99921	1	18268	0	-1.8714
MCM2	4	6.6348e-05	0.00026399	0.013848	360	4	-1.5422	0.99993	0.99993	1	18588	0	-1.5422
EIF3M	4	6.6752e-05	0.00026556	0.013886	361	3	-2.3594	0.33056	0.48016	1	8805	1	-2.3594
THOC3	4	6.6895e-05	0.00026661	0.013886	362	4	-2.767	0.99993	0.99993	1	18587	0	-2.767
POLR2F	4	6.7163e-05	0.00026713	0.013886	363	4	-3.7107	0.99836	0.99834	1	18127	0	-3.7107
POLR2C	4	6.7266e-05	0.00026766	0.013886	364	4	-4.9414	0.99605	0.99604	1	17925	0	-4.9414
TBCE	4	6.7406e-05	0.00027028	0.013983	365	4	-2.5077	0.99993	0.99993	1	18586	0	-2.5077
SNAPC2	4	6.8357e-05	0.00027343	0.013991	366	4	-1.5123	0.99993	0.99993	1	18585	0	-1.5123
POLR3E	4	6.8397e-05	0.00027395	0.013991	367	4	-1.4536	0.99993	0.99993	1	18584	0	-1.4536
AARS	4	6.8434e-05	0.00027447	0.013991	368	4	-2.4022	0.98406	0.98403	1	17413	0	-2.4022
NMT1	4	6.8597e-05	0.000275	0.013991	369	4	-2.932	0.99993	0.99993	1	18583	0	-2.932
DNM2	4	6.8613e-05	0.000275	0.013991	370	4	-3.1585	0.99992	0.99992	1	18572	0	-3.1585
RRM1	4	6.8977e-05	0.00027552	0.013991	371	4	-2.6883	0.99993	0.99993	1	18582	0	-2.6883
PPP6C	4	6.9238e-05	0.00027605	0.013991	372	4	-3.053	0.99993	0.99993	1	18581	0	-3.053
ELL	4	6.9399e-05	0.0002771	0.013991	373	4	-2.4779	0.99993	0.99993	1	18580	0	-2.4779
RPP25L	4	6.9662e-05	0.0002771	0.013991	374	3	-2.2202	0.78517	0.79323	1	13772	1	-2.2202
FPGS	4	7.029e-05	0.00027814	0.014007	375	4	-2.0554	0.99993	0.99993	1	18579	0	-2.0554
SPATA5	4	7.2439e-05	0.00028548	0.014326	376	3	-2.8544	0.77056	0.78218	1	13595	1	-2.8544
RPS27	4	7.2554e-05	0.00028601	0.014326	377	4	-3.5309	0.99993	0.99993	1	18578	0	-3.5309
DROSHA	4	7.2867e-05	0.00028811	0.014393	378	4	-2.6192	0.99993	0.99992	1	18577	0	-2.6192
RNPC3	4	7.3517e-05	0.00029125	0.014512	379	4	-1.4439	0.99993	0.99992	1	18576	0	-1.4439
ISY1	4	7.4293e-05	0.0002944	0.01463	380	3	-2.1702	0.97737	0.97754	1	17227	0	-2.1702
NOP2	4	7.5066e-05	0.00029964	0.014813	381	4	-3.4514	0.99957	0.99957	1	18358	0	-3.4514
RTCB	4	7.5343e-05	0.00029964	0.014813	382	4	-2.7261	0.99992	0.99992	1	18574	0	-2.7261
BATF	4	7.7072e-05	0.00030593	0.015084	383	4	-2.2816	0.99992	0.99992	1	18573	0	-2.2816
RPL37	4	7.7969e-05	0.0003096	0.015198	384	4	-3.3237	0.99992	0.99992	1	18571	0	-3.3237
CBWD5	4	7.8344e-05	0.00031013	0.015198	385	4	-2.6064	0.99992	0.99992	1	18570	0	-2.6064
CCT2	4	7.8551e-05	0.00031065	0.015198	386	3	-3.3157	0.88801	0.88797	1	15421	0	-3.3157
POLD2	4	7.9141e-05	0.00031275	0.015261	387	4	-2.3529	0.99992	0.99992	1	18569	0	-2.3529
POP7	4	7.9986e-05	0.00031747	0.015451	388	4	-3.164	0.99974	0.99973	1	18428	0	-3.164
TRIAP1	4	8.0393e-05	0.00032009	0.015539	389	4	-3.1457	0.99992	0.99992	1	18568	0	-3.1457
VPRBP	4	8.1934e-05	0.00032428	0.015687	390	4	-2.2956	0.99992	0.99992	1	18566	0	-2.2956
URB1	4	8.2254e-05	0.00032481	0.015687	391	4	-2.1557	0.99992	0.99992	1	18565	0	-2.1557
EIF4A3	4	8.3127e-05	0.00032743	0.015758	392	4	-4.3506	0.99992	0.99992	1	18564	0	-4.3506
MED21	4	8.3265e-05	0.00032795	0.015758	393	4	-2.7528	0.99992	0.99992	1	18563	0	-2.7528
POLD3	4	8.424e-05	0.0003311	0.015809	394	4	-1.7013	0.99992	0.99992	1	18562	0	-1.7013
FNBP4	4	8.4635e-05	0.00033162	0.015809	395	4	-1.5714	0.99933	0.99935	1	18294	0	-1.5714
ILF2	4	8.4755e-05	0.00033215	0.015809	396	3	-3.2191	0.86825	0.86815	1	15051	0	-3.2191
PDPK1	4	8.4871e-05	0.0003332	0.015809	397	4	-1.7154	0.99992	0.99992	1	18561	0	-1.7154
RPL24	4	8.4941e-05	0.0003332	0.015809	398	4	-2.3145	0.99992	0.99992	1	18560	0	-2.3145
RPS9	4	8.5538e-05	0.00033634	0.015888	399	4	-5.9901	0.99938	0.99939	1	18303	0	-5.9901
EIF3I	4	8.6447e-05	0.00033739	0.015888	400	4	-2.5614	0.99868	0.99866	1	18167	0	-2.5614
CRNKL1	4	8.6451e-05	0.00033739	0.015888	401	4	-2.6183	0.99991	0.99991	1	18559	0	-2.6183
RPS2	4	8.7056e-05	0.00033949	0.015947	402	3	-5.3881	0.90818	0.90816	1	15783	0	-5.3881
SUPT4H1	4	8.7549e-05	0.00034106	0.015982	403	4	-4.8783	0.99991	0.99991	1	18557	0	-4.8783
TIMM10	4	9.0647e-05	0.00035391	0.016542	404	4	-4.5516	0.99979	0.99979	1	18467	0	-4.5516
RPL11	4	9.277e-05	0.00036151	0.016856	405	4	-4.5074	0.99991	0.99991	1	18555	0	-4.5074
MMS19	4	9.3473e-05	0.00036518	0.016985	406	4	-2.1295	0.99991	0.99991	1	18553	0	-2.1295
DARS	4	9.4054e-05	0.0003678	0.017065	407	4	-1.5767	0.99991	0.99991	1	18552	0	-1.5767
RPS14	4	9.4786e-05	0.00037252	0.017242	408	3	-4.1246	0.85248	0.85235	1	14777	0	-4.1246
DUX4	4	9.5274e-05	0.00037567	0.017345	409	4	-5.3532	0.9999	0.99991	1	18551	0	-5.3532
SKIV2L	4	9.5941e-05	0.00037934	0.017472	410	4	-2.2543	0.9999	0.9999	1	18550	0	-2.2543
MCM5	4	9.6765e-05	0.00038353	0.017622	411	4	-1.7468	0.9999	0.9999	1	18549	0	-1.7468
PSMB1	4	9.8692e-05	0.00038772	0.017752	412	4	-2.2648	0.9999	0.9999	1	18548	0	-2.2648
FAM50A	4	9.8745e-05	0.00038825	0.017752	413	4	-2.1331	0.9999	0.9999	1	18547	0	-2.1331
SDHA	4	0.00010065	0.00039402	0.017972	414	4	-2.2583	0.9999	0.9999	1	18546	0	-2.2583
CDK12	4	0.00010145	0.00039821	0.01812	415	4	-1.8455	0.9999	0.9999	1	18545	0	-1.8455
PHAX	4	0.0001018	0.00039926	0.018124	416	4	-3.2189	0.9999	0.9999	1	18544	0	-3.2189
PSMD13	4	0.0001038	0.00040345	0.018271	417	4	-3.9287	0.9999	0.9999	1	18543	0	-3.9287
DHX33	4	0.00010433	0.0004045	0.018274	418	3	-2.6495	0.94409	0.94416	1	16478	0	-2.6495
ENO1	4	0.00010675	0.00041604	0.018631	419	4	-1.6978	0.99989	0.9999	1	18542	0	-1.6978
MED8	4	0.00010756	0.00041813	0.018631	420	3	-1.9854	0.72709	0.75244	1	13121	1	-1.9854
UTP20	4	0.00010795	0.00041866	0.018631	421	4	-2.3963	0.99707	0.99709	1	17991	0	-2.3963
POLR3H	4	0.00010837	0.00041971	0.018631	422	4	-2.8372	0.99989	0.9999	1	18541	0	-2.8372
COX17	4	0.00010865	0.00042023	0.018631	423	4	-2.4385	0.99989	0.9999	1	18540	0	-2.4385
C3orf17	4	0.00010865	0.00042023	0.018631	424	4	-2.1804	0.99958	0.99958	1	18359	0	-2.1804
FARSA	4	0.0001088	0.00042076	0.018631	425	3	-3.6038	0.92282	0.92293	1	16063	0	-3.6038
SIN3A	4	0.00010882	0.00042076	0.018631	426	4	-1.6898	0.99989	0.9999	1	18539	0	-1.6898
POLR1C	4	0.00010905	0.00042128	0.018631	427	4	-1.7478	0.99989	0.9999	1	18538	0	-1.7478
SPDYE2	4	0.00010993	0.00042547	0.018773	428	4	-3.2668	0.99631	0.99632	1	17939	0	-3.2668
POT1	4	0.00011079	0.00042914	0.01889	429	4	-1.7743	0.99959	0.99959	1	18363	0	-1.7743
LETM1	4	0.00011335	0.00043911	0.019196	430	4	-2.8487	0.99989	0.99989	1	18536	0	-2.8487
RPTOR	4	0.00011341	0.00043963	0.019196	431	4	-3.0742	0.99989	0.99989	1	18535	0	-3.0742
WDR61	4	0.00011353	0.00043963	0.019196	432	3	-2.1304	0.87168	0.87161	1	15111	0	-2.1304
TBCD	4	0.00011367	0.00044015	0.019196	433	2	-1.0765	0.64408	0.70428	1	12376	1	-1.0765
TUFM	4	0.00011448	0.00044382	0.019267	434	4	-3.3523	0.99901	0.999	1	18216	0	-3.3523
AURKB	4	0.00011458	0.00044382	0.019267	435	4	-2.2617	0.99989	0.99989	1	18534	0	-2.2617
CDK4	4	0.00011581	0.00044749	0.019338	436	4	-3.3979	0.99988	0.99989	1	18533	0	-3.3979
MCM3AP	4	0.00011588	0.00044749	0.019338	437	3	-2.1896	0.36312	0.5121	1	9345	1	-2.1896
HSCB	4	0.00011623	0.00044854	0.019339	438	4	-1.9739	0.99988	0.99989	1	18532	0	-1.9739
CENPW	4	0.00011669	0.0004509	0.019396	439	3	-2.3575	0.93878	0.93879	1	16370	0	-2.3575
PLK4	4	0.00011739	0.00045326	0.019453	440	4	-1.9588	0.99988	0.99989	1	18531	0	-1.9588
SPATA5L1	4	0.0001182	0.00045746	0.019589	441	4	-2.4601	0.99988	0.99989	1	18530	0	-2.4601
UBE2J2	4	0.00011904	0.00046375	0.019813	442	4	-2.2927	0.99988	0.99989	1	18529	0	-2.2927
ZNF626	4	0.00012166	0.00047371	0.020193	443	4	-5.2392	0.99988	0.99989	1	18528	0	-5.2392
NUP155	4	0.00012357	0.00047948	0.020393	444	3	-2.3737	0.88629	0.88627	1	15387	0	-2.3737
IPO9	4	0.00012376	0.00048157	0.020408	445	4	-2.6397	0.99988	0.99988	1	18526	0	-2.6397
RPL27A	4	0.00012395	0.0004821	0.020408	446	4	-3.7027	0.99988	0.99988	1	18525	0	-3.7027
NOP14	4	0.0001247	0.00048367	0.020408	447	4	-2.5241	0.99988	0.99988	1	18524	0	-2.5241
SF1	4	0.00012494	0.0004842	0.020408	448	4	-3.1695	0.98406	0.98404	1	17415	0	-3.1695
BAP1	4	0.00012517	0.00048524	0.020408	449	4	-2.2724	0.99987	0.99988	1	18523	0	-2.2724
ZBTB8OS	4	0.00012551	0.0004876	0.020462	450	3	-4.3004	0.7623	0.77619	1	13494	1	-4.3004
DYNLRB1	4	0.00012583	0.00048944	0.020494	451	4	-2.4451	0.99987	0.99988	1	18522	0	-2.4451
PGD	4	0.00012627	0.00049206	0.020558	452	4	-2.2737	0.99987	0.99988	1	18521	0	-2.2737
U2AF1	4	0.00012778	0.00049783	0.020729	453	4	-2.8954	0.99977	0.99977	1	18455	0	-2.8954
NUDT4	4	0.00012811	0.00049835	0.020729	454	4	-1.8371	0.99987	0.99988	1	18520	0	-1.8371
SLC16A1	4	0.00012907	0.0005036	0.020853	455	4	-1.223	0.99987	0.99988	1	18519	0	-1.223
RPL12	4	0.00012923	0.00050412	0.020853	456	4	-4.5853	0.99987	0.99988	1	18518	0	-4.5853
C16orf62	4	0.00012936	0.00050464	0.020853	457	4	-2.54	0.99921	0.99921	1	18266	0	-2.54
USP7	4	0.0001299	0.00050622	0.020872	458	4	-2.3764	0.99987	0.99988	1	18517	0	-2.3764
SMC1A	4	0.00013023	0.00050779	0.020891	459	4	-1.6964	0.99987	0.99988	1	18516	0	-1.6964
DGCR8	4	0.00013047	0.00050936	0.02091	460	3	-2.2105	0.97588	0.97603	1	17191	0	-2.2105
CHERP	4	0.00013127	0.00051303	0.021015	461	4	-2.9102	0.99786	0.99786	1	18070	0	-2.9102
CDC42	4	0.00013214	0.00051565	0.021077	462	4	-1.1287	0.99987	0.99987	1	18515	0	-1.1287
SUPV3L1	4	0.00013329	0.00052142	0.021267	463	4	-1.8198	0.99987	0.99987	1	18513	0	-1.8198
XRCC5	4	0.00013467	0.00053138	0.021626	464	4	-3.9739	0.99867	0.99864	1	18165	0	-3.9739
XRCC6	4	0.00013581	0.00053296	0.021644	465	3	-2.7573	0.9774	0.97757	1	17228	0	-2.7573
RPS20	4	0.00013977	0.00054711	0.022119	466	4	-4.1995	0.99919	0.99919	1	18260	0	-4.1995
SSRP1	4	0.00013978	0.00054711	0.022119	467	4	-2.6669	0.99742	0.99741	1	18029	0	-2.6669
YRDC	4	0.00013995	0.00054816	0.022119	468	4	-4.2137	0.99144	0.99148	1	17695	0	-4.2137
ELP2	4	0.00014053	0.00055078	0.022177	469	4	-1.3744	0.99986	0.99986	1	18511	0	-1.3744
CRCP	4	0.00014096	0.00055288	0.022214	470	4	-2.3696	0.99907	0.99906	1	18227	0	-2.3696
THOC1	4	0.00014163	0.00055707	0.022335	471	4	-2.043	0.99986	0.99986	1	18509	0	-2.043
DDOST	4	0.00014366	0.00056599	0.022644	472	4	-1.6835	0.99974	0.99975	1	18435	0	-1.6835
EXOC4	4	0.00014486	0.00057071	0.022731	473	4	-2.252	0.99986	0.99986	1	18507	0	-2.252
LRRC37A3	4	0.0001451	0.00057123	0.022731	474	4	-3.5591	0.99985	0.99986	1	18506	0	-3.5591
EIF3A	4	0.00014537	0.00057176	0.022731	475	4	-4.0621	0.99977	0.99977	1	18453	0	-4.0621
TNPO3	4	0.00014644	0.00057752	0.022803	476	4	-1.8366	0.99985	0.99986	1	18505	0	-1.8366
N6AMT1	4	0.00014707	0.00057857	0.022803	477	4	-1.4848	0.99985	0.99986	1	18504	0	-1.4848
UQCR10	4	0.00014726	0.0005791	0.022803	478	3	-2.425	0.90236	0.90235	1	15667	0	-2.425
RAN	4	0.00014744	0.0005791	0.022803	479	3	-4.5847	0.96431	0.96435	1	16903	0	-4.5847
EP300	4	0.00014778	0.00057962	0.022803	480	4	-3.5521	0.99976	0.99976	1	18446	0	-3.5521
VWA9	4	0.00014928	0.00058434	0.022941	481	4	-1.8846	0.99985	0.99986	1	18503	0	-1.8846
TOP3A	4	0.00015198	0.00059482	0.023304	482	4	-1.4692	0.99846	0.99843	1	18140	0	-1.4692
RANGAP1	4	0.00015311	0.00059797	0.023372	483	4	-2.5226	0.99985	0.99985	1	18501	0	-2.5226
NOP10	4	0.0001534	0.00059902	0.023372	484	4	-2.0612	0.99985	0.99985	1	18500	0	-2.0612
PGS1	4	0.00015545	0.00060479	0.023484	485	4	-1.9377	0.99984	0.99985	1	18499	0	-1.9377
PSMD14	4	0.00015554	0.00060505	0.023484	486	3	-1.9459	0.51747	0.6447	1	11452	1	-1.9459
PSMG1	4	0.00015568	0.00060584	0.023484	487	4	-1.4532	0.99984	0.99985	1	18498	0	-1.4532
METTL3	4	0.0001559	0.00060688	0.023484	488	4	-2.4344	0.99087	0.99087	1	17661	0	-2.4344
TUBGCP3	4	0.00015752	0.00061265	0.023659	489	3	-2.5349	0.92677	0.9269	1	16136	0	-2.5349
CHMP3	4	0.00015934	0.00061842	0.023748	490	4	-1.8412	0.99917	0.99917	1	18255	0	-1.8412
PRPF8	4	0.00015948	0.00061894	0.023748	491	4	-6.025	0.99984	0.99985	1	18496	0	-6.025
TELO2	4	0.00015963	0.00061894	0.023748	492	4	-2.0052	0.99984	0.99985	1	18495	0	-2.0052
DIS3	4	0.00015988	0.00061999	0.023748	493	4	-3.1663	0.99891	0.9989	1	18203	0	-3.1663
AAAS	4	0.00016118	0.00062419	0.023812	494	4	-1.7239	0.99984	0.99984	1	18494	0	-1.7239
TPR	4	0.00016144	0.00062419	0.023812	495	4	-2.1016	0.99984	0.99984	1	18493	0	-2.1016
WDR36	4	0.00016282	0.00063048	0.024004	496	4	-1.5463	0.99918	0.99917	1	18256	0	-1.5463
RFC3	4	0.00016408	0.00063415	0.024056	497	4	-1.7459	0.99984	0.99984	1	18492	0	-1.7459
UBAP1	4	0.00016486	0.00063677	0.024056	498	3	-2.5757	0.8997	0.89965	1	15613	0	-2.5757
ECD	4	0.00016519	0.00063782	0.024056	499	4	-3.8491	0.99983	0.99984	1	18491	0	-3.8491
DGCR14	4	0.00016533	0.00063782	0.024056	500	4	-2.3217	0.9878	0.9878	1	17535	0	-2.3217
HNRNPH1	4	0.00016643	0.00064149	0.024056	501	4	-2.054	0.99983	0.99984	1	18490	0	-2.054
SAE1	4	0.00016744	0.00064201	0.024056	502	4	-1.897	0.99983	0.99984	1	18489	0	-1.897
ATP5A1	4	0.00016767	0.00064254	0.024056	503	4	-1.8325	0.99972	0.99972	1	18421	0	-1.8325
TOMM20	4	0.00016807	0.00064306	0.024056	504	4	-2.4426	0.99983	0.99984	1	18488	0	-2.4426
EMC6	4	0.0001683	0.00064332	0.024056	505	4	-2.2519	0.99983	0.99984	1	18487	0	-2.2519
RBX1	4	0.00016885	0.00064463	0.024058	506	4	-2.0065	0.99983	0.99984	1	18486	0	-2.0065
PMF1-BGLAP	4	0.00017147	0.00065512	0.024401	507	4	-2.5833	0.99971	0.99971	1	18412	0	-2.5833
TANGO6	4	0.00017301	0.00066141	0.024587	508	4	-3.2216	0.99931	0.99933	1	18291	0	-3.2216
PWP2	4	0.00017361	0.00066351	0.024616	509	4	-4.6544	0.99968	0.99967	1	18395	0	-4.6544
VPS28	4	0.00017591	0.000674	0.024956	510	4	-2.6338	0.99945	0.99946	1	18321	0	-2.6338
HK2	4	0.00017954	0.00068238	0.025099	511	4	-1.8227	0.99982	0.99982	1	18485	0	-1.8227
YKT6	4	0.0001796	0.00068291	0.025099	512	4	-2.4662	0.98639	0.98636	1	17498	0	-2.4662
HSPA14	4	0.00018002	0.00068343	0.025099	513	4	-1.8938	0.98241	0.98243	1	17364	0	-1.8938
NOL6	4	0.00018036	0.00068343	0.025099	514	4	-2.6745	0.99982	0.99982	1	18484	0	-2.6745
HNRNPL	4	0.00018069	0.00068448	0.025099	515	4	-2.218	0.99982	0.99982	1	18483	0	-2.218
E4F1	4	0.00018193	0.00069025	0.025261	516	4	-1.221	0.99982	0.99982	1	18482	0	-1.221
ALG2	4	0.0001842	0.00069602	0.025423	517	4	-2.9459	0.99968	0.99968	1	18399	0	-2.9459
DDX18	4	0.00018586	0.00069916	0.025488	518	4	-2.848	0.99981	0.99982	1	18481	0	-2.848
IGBP1	4	0.00018746	0.00070388	0.025611	519	4	-3.2012	0.99457	0.99459	1	17851	0	-3.2012
ANAPC1	4	0.0001909	0.00071646	0.026019	520	3	-2.0542	0.58376	0.67409	1	11918	1	-2.0542
WBSCR16	4	0.00019519	0.00073481	0.026519	521	4	-1.8851	0.9998	0.9998	1	18479	0	-1.8851
SMNDC1	4	0.00019548	0.00073534	0.026519	522	3	-2.082	0.95377	0.95379	1	16664	0	-2.082
PRPF4	4	0.00019549	0.00073534	0.026519	523	4	-3.1352	0.9998	0.9998	1	18478	0	-3.1352
MIOS	4	0.00019567	0.00073586	0.026519	524	4	-2.0889	0.9998	0.9998	1	18477	0	-2.0889
ESPL1	4	0.00019691	0.00074058	0.026638	525	3	-1.6573	0.89196	0.89189	1	15482	0	-1.6573
ATP5D	4	0.00019733	0.00074215	0.026644	526	4	-1.6598	0.98672	0.98667	1	17515	0	-1.6598
DPAGT1	4	0.00019831	0.00074373	0.02665	527	4	-2.0035	0.9998	0.9998	1	18476	0	-2.0035
FAM25G	4	0.00019893	0.0007453	0.026656	528	4	-1.4491	0.9998	0.9998	1	18475	0	-1.4491
RPS3	4	0.00020092	0.00075421	0.026924	529	3	-3.1807	0.95824	0.95826	1	16766	0	-3.1807
VPS13D	4	0.00020134	0.00075631	0.026948	530	4	-2.1158	0.99496	0.99497	1	17867	0	-2.1158
CCNA2	4	0.00020404	0.00076942	0.027363	531	4	-2.3543	0.9998	0.9998	1	18474	0	-2.3543
UQCRB	4	0.00020477	0.00077099	0.027367	532	4	-2.2087	0.9998	0.9998	1	18473	0	-2.2087
PRPF38B	4	0.00020522	0.00077361	0.027409	533	4	-2.2117	0.99979	0.9998	1	18472	0	-2.2117
MYC	4	0.00020622	0.00077833	0.027514	534	4	-2.3738	0.99979	0.99979	1	18471	0	-2.3738
PUM1	4	0.00020741	0.00078043	0.027514	535	4	-1.2907	0.99979	0.99979	1	18470	0	-1.2907
CGB8	4	0.00020768	0.00078095	0.027514	536	4	-1.5435	0.99979	0.99979	1	18469	0	-1.5435
NPIPA1	4	0.00020869	0.00078672	0.027666	537	4	-2.0389	0.99979	0.99979	1	18468	0	-2.0389
XAB2	4	0.00020942	0.00078882	0.027688	538	3	-2.6335	0.96619	0.96623	1	16948	0	-2.6335
CPSF3	4	0.00021268	0.0007993	0.027989	539	4	-1.9983	0.99979	0.99979	1	18466	0	-1.9983
EXOC3	4	0.00021304	0.00080035	0.027989	540	4	-2.3438	0.99976	0.99976	1	18445	0	-2.3438
TCEB1	4	0.00021521	0.00081031	0.028285	541	4	-1.8294	0.99978	0.99979	1	18465	0	-1.8294
SLC25A3	4	0.00021615	0.00081241	0.028306	542	4	-3.6166	0.99282	0.99284	1	17756	0	-3.6166
CDC45	4	0.00021726	0.00081608	0.028329	543	4	-2.6076	0.99546	0.99545	1	17898	0	-2.6076
SRF	4	0.00021729	0.00081608	0.028329	544	4	-1.5165	0.99978	0.99978	1	18464	0	-1.5165
LRRC37A	4	0.00021838	0.0008208	0.02844	545	4	-2.6601	0.99962	0.99962	1	18379	0	-2.6601
CHURC1-FNTB	4	0.00021883	0.00082237	0.028443	546	4	-2.384	0.99464	0.99466	1	17857	0	-2.384
RABGGTA	4	0.00021977	0.000825	0.028481	547	4	-2.7491	0.99978	0.99978	1	18463	0	-2.7491
TP53RK	4	0.00022039	0.00082814	0.028538	548	4	-3.5948	0.99978	0.99978	1	18462	0	-3.5948
NUS1	4	0.00022199	0.00083391	0.028652	549	4	-2.6556	0.99959	0.99959	1	18366	0	-2.6556
EIF2S2	4	0.00022245	0.00083496	0.028652	550	4	-2.693	0.99427	0.9943	1	17833	0	-2.693
RPL18	4	0.00022324	0.00083601	0.028652	551	4	-6.4525	0.99971	0.99971	1	18415	0	-6.4525
DHX37	4	0.0002276	0.00085069	0.029102	552	4	-3.7115	0.99533	0.99532	1	17885	0	-3.7115
CAMLG	4	0.0002286	0.00085488	0.029193	553	4	-1.3459	0.99977	0.99977	1	18460	0	-1.3459
KANSL3	4	0.00022929	0.00085803	0.029247	554	4	-2.0407	0.99977	0.99977	1	18459	0	-2.0407
TUBB8	4	0.00022956	0.00086012	0.029252	555	4	-3.7189	0.99719	0.99719	1	18006	0	-3.7189
RAD1	4	0.00022988	0.00086275	0.029252	556	4	-2.2733	0.99977	0.99977	1	18458	0	-2.2733
RTEL1	4	0.00023008	0.00086327	0.029252	557	4	-2.703	0.99977	0.99977	1	18457	0	-2.703
RPL13A	4	0.00023096	0.00086537	0.029252	558	3	-4.5648	0.74874	0.76669	1	13367	1	-4.5648
BMS1	4	0.00023157	0.00086746	0.029252	559	4	-2.483	0.99977	0.99977	1	18456	0	-2.483
RRN3	4	0.00023165	0.00086746	0.029252	560	3	-3.1392	0.021941	0.067751	0.744899	1715	1	-3.1392
COX15	4	0.00023287	0.00087009	0.029288	561	4	-1.8683	0.99977	0.99977	1	18454	0	-1.8683
GTF2A2	4	0.00023477	0.00087638	0.02931	562	4	-1.5784	0.99977	0.99977	1	18452	0	-1.5784
RPL41	4	0.00023557	0.00087795	0.02931	563	4	-1.7153	0.99976	0.99977	1	18451	0	-1.7153
RPS28	4	0.00023564	0.00087795	0.02931	564	3	-2.3521	0.9799	0.97998	1	17301	0	-2.3521
GPN2	4	0.000236	0.000879	0.02931	565	4	-3.9119	0.99504	0.99505	1	17872	0	-3.9119
TIMELESS	4	0.00023635	0.00087952	0.02931	566	3	-2.6131	0.6956	0.73302	1	12810	1	-2.6131
C10orf2	4	0.00023668	0.00088005	0.02931	567	4	-1.3353	0.99976	0.99977	1	18450	0	-1.3353
RPL27	4	0.00023831	0.00088424	0.029398	568	4	-3.5953	0.99976	0.99976	1	18449	0	-3.5953
CCT6A	4	0.00024168	0.00089945	0.029833	569	4	-4.2644	0.99976	0.99976	1	18448	0	-4.2644
PCF11	4	0.00024194	0.0009005	0.029833	570	4	-1.6704	0.99976	0.99976	1	18447	0	-1.6704
SSU72	4	0.00024514	0.00090993	0.030058	571	4	-3.7934	0.99975	0.99976	1	18444	0	-3.7934
EIF2B2	4	0.00024544	0.00091046	0.030058	572	4	-2.2634	0.99738	0.99738	1	18021	0	-2.2634
SMN1	4	0.00024675	0.00091413	0.030125	573	4	-2.3994	0.99975	0.99976	1	18443	0	-2.3994
NOP16	4	0.00024739	0.00091675	0.030125	574	4	-2.0656	0.98931	0.9893	1	17600	0	-2.0656
C14orf80	4	0.00024788	0.00091727	0.030125	575	4	-2.5543	0.99645	0.99648	1	17947	0	-2.5543
POLR2I	4	0.00025057	0.00092881	0.030397	576	4	-2.9168	0.99512	0.99513	1	17878	0	-2.9168
CASC3	4	0.00025063	0.00092881	0.030397	577	4	-1.0677	0.99975	0.99975	1	18441	0	-1.0677
RFC2	4	0.00025106	0.00093038	0.030397	578	4	-2.5516	0.99974	0.99974	1	18432	0	-2.5516
SMARCD1	4	0.00025229	0.00093825	0.030601	579	4	-1.7932	0.99142	0.99146	1	17692	0	-1.7932
PPP1R8	4	0.00025279	0.00094087	0.030633	580	3	-2.6068	0.94563	0.94564	1	16505	0	-2.6068
ELP3	4	0.00025483	0.00094926	0.030808	581	4	-3.9358	0.99975	0.99975	1	18440	0	-3.9358
VPS51	4	0.00025553	0.0009524	0.030808	582	4	-1.485	0.99974	0.99975	1	18439	0	-1.485
XPO5	4	0.00025649	0.0009545	0.030808	583	4	-1.5223	0.99974	0.99975	1	18438	0	-1.5223
ISCA2	4	0.0002566	0.00095502	0.030808	584	4	-2.6467	0.99974	0.99975	1	18437	0	-2.6467
DDX55	4	0.00025671	0.00095555	0.030808	585	4	-1.6978	0.99974	0.99975	1	18436	0	-1.6978
GNG5	4	0.00025735	0.0009566	0.030808	586	4	-2.2618	0.99974	0.99975	1	18434	0	-2.2618
NSL1	4	0.00025767	0.00095764	0.030808	587	4	-2.0034	0.99974	0.99974	1	18433	0	-2.0034
YAE1D1	4	0.00025881	0.00096131	0.030819	588	4	-1.8834	0.99974	0.99974	1	18431	0	-1.8834
TIMM13	4	0.00025908	0.00096236	0.030819	589	4	-1.5724	0.99974	0.99974	1	18430	0	-1.5724
NDUFB10	4	0.00025939	0.00096289	0.030819	590	3	-1.3368	0.36335	0.51232	1	9350	1	-1.3368
RPA3	4	0.00026223	0.0009718	0.031052	591	4	-1.7229	0.99974	0.99974	1	18429	0	-1.7229
PDCD5	4	0.00026552	0.00098281	0.03135	592	4	-1.838	0.99973	0.99973	1	18427	0	-1.838
NAT10	4	0.00026944	0.00099382	0.031628	593	3	-1.959	0.19865	0.35077	0.971866	6814	1	-1.959
WDR77	4	0.00026985	0.00099487	0.031628	594	4	-3.9852	0.99973	0.99973	1	18426	0	-3.9852
C19orf52	4	0.00027022	0.00099697	0.031642	595	4	-4.7189	0.98992	0.98988	1	17629	0	-4.7189
CHEK1	4	0.00027125	0.00099959	0.031672	596	4	-3.0093	0.99866	0.99862	1	18162	0	-3.0093
SFSWAP	4	0.00027298	0.0010085	0.031873	597	4	-1.2372	0.99973	0.99973	1	18425	0	-1.2372
RSL1D1	4	0.00027343	0.0010106	0.031873	598	4	-1.9379	0.99973	0.99973	1	18424	0	-1.9379
TSR2	4	0.00027359	0.0010122	0.031873	599	4	-3.6863	0.99098	0.99098	1	17666	0	-3.6863
POLR1B	4	0.00027411	0.0010127	0.031873	600	4	-2.1448	0.99702	0.99704	1	17987	0	-2.1448
NELFCD	4	0.00027609	0.001019	0.031993	601	4	-1.8271	0.99972	0.99972	1	18422	0	-1.8271
SHANK3	4	0.00027717	0.0010211	0.031993	602	4	-1.3246	0.99972	0.99972	1	18420	0	-1.3246
UBE2T	4	0.00027725	0.0010216	0.031993	603	4	-1.484	0.99936	0.99938	1	18299	0	-1.484
TMX2	4	0.00028129	0.0010352	0.03233	604	4	-1.6349	0.99972	0.99972	1	18419	0	-1.6349
GPI	4	0.00028147	0.0010358	0.03233	605	4	-1.8034	0.99972	0.99972	1	18418	0	-1.8034
HYPK	4	0.00028198	0.0010379	0.032342	606	4	-2.0272	0.99972	0.99972	1	18417	0	-2.0272
BLVRB	4	0.00028268	0.0010405	0.03237	607	4	-1.3957	0.99972	0.99972	1	18416	0	-1.3957
ATP6AP2	4	0.00028493	0.0010473	0.032491	608	3	-2.9043	0.89506	0.89501	1	15526	0	-2.9043
NLE1	4	0.0002852	0.0010478	0.032491	609	4	-3.7014	0.99757	0.99756	1	18042	0	-3.7014
CENPO	4	0.00028654	0.001051	0.032535	610	4	-2.0558	0.99955	0.99955	1	18351	0	-2.0558
TUBA1B	4	0.00028734	0.0010557	0.032628	611	4	-1.9503	0.99923	0.99924	1	18274	0	-1.9503
NDUFS1	4	0.00028815	0.0010604	0.03272	612	3	-2.4812	0.96842	0.96846	1	17012	0	-2.4812
ZNHIT6	4	0.00028908	0.0010641	0.03278	613	4	-1.5257	0.99971	0.99971	1	18413	0	-1.5257
CCT5	4	0.00029067	0.0010698	0.032899	614	4	-1.7967	0.99971	0.99971	1	18411	0	-1.7967
MRPS2	4	0.00029138	0.0010714	0.032899	615	4	-1.3183	0.99971	0.99971	1	18410	0	-1.3183
PUF60	4	0.00029274	0.0010788	0.03307	616	4	-2.1232	0.99971	0.99971	1	18409	0	-2.1232
RPL3	4	0.00029358	0.0010824	0.033129	617	4	-2.2445	0.99971	0.9997	1	18408	0	-2.2445
PPP1R15B	4	0.00029465	0.0010856	0.033172	618	4	-1.6867	0.99971	0.9997	1	18407	0	-1.6867
PSMC6	4	0.00029704	0.0010932	0.03335	619	4	-3.8572	0.9997	0.9997	1	18406	0	-3.8572
NAA20	4	0.00029824	0.0010961	0.033362	620	4	-2.0199	0.9997	0.9997	1	18405	0	-2.0199
NDC80	4	0.00029878	0.0010971	0.033362	621	4	-3.6959	0.98759	0.98758	1	17531	0	-3.6959
EXOSC9	4	0.0002992	0.0010992	0.033372	622	4	-1.4526	0.9997	0.9997	1	18404	0	-1.4526
KDM4A	4	0.00030089	0.001105	0.033493	623	4	-1.338	0.9997	0.9997	1	18403	0	-1.338
NOM1	4	0.00031287	0.0011511	0.034836	624	4	-3.1574	0.99969	0.99969	1	18402	0	-3.1574
ACTL6A	4	0.00031431	0.0011564	0.034939	625	4	-1.8095	0.99969	0.99968	1	18401	0	-1.8095
UROD	4	0.00031621	0.0011621	0.035057	626	4	-2.6282	0.99959	0.99959	1	18364	0	-2.6282
PRKDC	4	0.00031745	0.0011679	0.035175	627	4	-0.96889	0.99968	0.99968	1	18400	0	-0.96889
LIAS	4	0.00031883	0.0011731	0.035276	628	4	-2.0291	0.99968	0.99968	1	18398	0	-2.0291
PPAN	4	0.00032052	0.0011768	0.03533	629	4	-2.3916	0.99899	0.99898	1	18213	0	-2.3916
NOL12	4	0.00032239	0.0011836	0.035479	630	4	-1.5078	0.99968	0.99967	1	18396	0	-1.5078
PEX5	4	0.00032354	0.0011889	0.035539	631	4	-1.5208	0.99968	0.99967	1	18394	0	-1.5208
MRPL27	4	0.00032405	0.0011894	0.035539	632	4	-1.5428	0.99968	0.99967	1	18393	0	-1.5428
CDAN1	4	0.00033015	0.0012125	0.036171	633	4	-2.4048	0.99719	0.99719	1	18007	0	-2.4048
ATP6V1C1	4	0.00033586	0.0012308	0.03666	634	4	-1.6918	0.99966	0.99966	1	18392	0	-1.6918
NDUFS2	4	0.0003373	0.001234	0.036696	635	4	-2.2077	0.99966	0.99966	1	18391	0	-2.2077
LARS2	4	0.0003381	0.0012366	0.036716	636	4	-1.3105	0.99966	0.99966	1	18390	0	-1.3105
PHB2	4	0.00033862	0.0012392	0.036736	637	4	-4.1627	0.99642	0.99644	1	17945	0	-4.1627
VMP1	4	0.00033937	0.0012434	0.036803	638	4	-2.187	0.99953	0.99953	1	18347	0	-2.187
MBD3L2	4	0.00034329	0.001256	0.037117	639	4	-2.3941	0.99034	0.99034	1	17642	0	-2.3941
GCN1L1	4	0.0003465	0.0012633	0.037276	640	4	-1.7983	0.99965	0.99965	1	18389	0	-1.7983
TRAIP	4	0.00034784	0.0012675	0.037302	641	3	-2.7681	0.9706	0.97064	1	17056	0	-2.7681
RCL1	4	0.00034879	0.0012686	0.037302	642	4	-1.2995	0.99965	0.99965	1	18388	0	-1.2995
FARS2	4	0.00034906	0.0012701	0.037302	643	4	-1.5523	0.99965	0.99965	1	18387	0	-1.5523
DDX27	4	0.00035096	0.0012801	0.037493	644	4	-1.7926	0.99965	0.99965	1	18386	0	-1.7926
AMD1	4	0.0003512	0.0012806	0.037493	645	3	-4.2559	0.60953	0.68658	1	12110	1	-4.2559
EIF1AD	4	0.00035698	0.0013032	0.038094	646	4	-2.9958	0.99964	0.99964	1	18385	0	-2.9958
UBA52	4	0.000358	0.0013053	0.038097	647	3	-2.656	0.89533	0.89527	1	15529	0	-2.656
RRP15	4	0.00035924	0.0013089	0.038145	648	3	-2.1116	0.61507	0.68934	1	12158	1	-2.1116
PFDN6	4	0.00036049	0.0013136	0.038223	649	3	-4.0819	0.64622	0.70546	1	12394	1	-4.0819
DHX38	4	0.00036433	0.001333	0.038728	650	4	-1.4011	0.99964	0.99963	1	18384	0	-1.4011
AAMP	4	0.00036685	0.0013456	0.039034	651	4	-1.7191	0.99963	0.99963	1	18383	0	-1.7191
ATP6V0E1	4	0.00036854	0.0013545	0.039232	652	4	-1.62	0.99963	0.99963	1	18382	0	-1.62
RPS15	4	0.00037392	0.0013739	0.039733	653	3	-4.5732	0.91392	0.91391	1	15895	0	-4.5732
SNF8	4	0.00037568	0.0013771	0.039762	654	3	-1.9374	0.90307	0.90307	1	15685	0	-1.9374
SRSF7	4	0.00037678	0.0013808	0.039762	655	4	-2.9514	0.99962	0.99962	1	18381	0	-2.9514
EIF5	4	0.00037697	0.0013813	0.039762	656	4	-2.4103	0.99911	0.99911	1	18238	0	-2.4103
CYC1	4	0.00037793	0.001386	0.039792	657	3	-3.3718	0.91725	0.9173	1	15956	0	-3.3718
RNF113A	4	0.00037822	0.0013865	0.039792	658	4	-1.6744	0.99962	0.99962	1	18380	0	-1.6744
CEBPZ	4	0.00037938	0.0013907	0.039852	659	4	-3.0821	0.99914	0.99913	1	18244	0	-3.0821
ALG13	4	0.00038019	0.0013949	0.039911	660	4	-2.9823	0.98427	0.98425	1	17427	0	-2.9823
XPO1	4	0.00038197	0.0014007	0.040016	661	4	-3.7847	0.98578	0.98575	1	17479	0	-3.7847
ATIC	4	0.00038574	0.0014101	0.040225	662	4	-2.2011	0.99961	0.99961	1	18378	0	-2.2011
LIN52	4	0.00038918	0.0014222	0.040472	663	4	-2.4632	0.99961	0.99961	1	18377	0	-2.4632
BUB1B	4	0.00038984	0.0014269	0.040472	664	4	-3.2297	0.99961	0.99961	1	18375	0	-3.2297
BOP1	4	0.00039073	0.0014279	0.040472	665	4	-2.5226	0.99961	0.99961	1	18374	0	-2.5226
GMPPB	4	0.00039096	0.0014285	0.040472	666	4	-2.4402	0.9929	0.99292	1	17758	0	-2.4402
TBCC	4	0.00039102	0.0014295	0.040472	667	4	-2.3239	0.99961	0.99961	1	18373	0	-2.3239
TOMM22	4	0.00039129	0.0014321	0.040486	668	3	-2.2436	0.98041	0.98047	1	17310	0	-2.2436
CHORDC1	4	0.00039559	0.0014479	0.040744	669	4	-2.7963	0.9978	0.9978	1	18065	0	-2.7963
CGB	4	0.00039591	0.0014484	0.040744	670	4	-1.5167	0.9996	0.9996	1	18372	0	-1.5167
ARHGEF5	4	0.00039606	0.0014489	0.040744	671	4	-1.2764	0.9996	0.9996	1	18371	0	-1.2764
CSTF3	4	0.00039695	0.0014505	0.040744	672	4	-1.7178	0.9996	0.9996	1	18370	0	-1.7178
COA6	4	0.00039784	0.0014521	0.040744	673	4	-1.8701	0.9996	0.9996	1	18369	0	-1.8701
C2orf27B	4	0.00040126	0.0014636	0.041007	674	4	-1.9744	0.99102	0.99102	1	17669	0	-1.9744
DDX41	4	0.00040189	0.0014662	0.041019	675	4	-1.0158	0.9996	0.99959	1	18368	0	-1.0158
PYROXD1	4	0.0004036	0.0014725	0.041135	676	4	-1.638	0.99881	0.99879	1	18186	0	-1.638
MRPL10	4	0.00040483	0.0014772	0.041159	677	4	-2.2467	0.9996	0.99959	1	18367	0	-2.2467
CUL3	4	0.00040495	0.0014778	0.041159	678	3	-1.6099	0.022671	0.069241	0.74635	1749	1	-1.6099
SEPHS2	4	0.00041145	0.001504	0.041828	679	4	-0.86689	0.99959	0.99959	1	18365	0	-0.86689
EIF3D	4	0.00041575	0.0015202	0.042218	680	4	-1.9253	0.99958	0.99958	1	18362	0	-1.9253
MRPS18A	4	0.00041846	0.0015307	0.042446	681	4	-1.7079	0.99958	0.99958	1	18361	0	-1.7079
FTSJ3	4	0.00042307	0.0015417	0.042579	682	3	-1.575	0.774	0.7847	1	13637	1	-1.575
TOPBP1	4	0.00042321	0.0015417	0.042579	683	4	-1.6654	0.99958	0.99958	1	18360	0	-1.6654
POLRMT	4	0.00042342	0.0015422	0.042579	684	4	-1.9078	0.99095	0.99095	1	17664	0	-1.9078
TCEB2	4	0.00042682	0.0015554	0.042878	685	4	-3.5796	0.99957	0.99957	1	18357	0	-3.5796
RPS29	4	0.00042865	0.0015627	0.043017	686	3	-2.2777	0.96407	0.9641	1	16897	0	-2.2777
HEATR1	4	0.00043075	0.0015706	0.043055	687	3	-1.9837	0.85645	0.85635	1	14841	0	-1.9837
DTL	4	0.00043112	0.0015711	0.043055	688	4	-3.842	0.99767	0.99767	1	18051	0	-3.842
MRPS35	4	0.00043181	0.0015721	0.043055	689	4	-1.8047	0.98826	0.98828	1	17555	0	-1.8047
LIPT1	4	0.00043216	0.0015732	0.043055	690	3	-1.8829	0.98074	0.98077	1	17320	0	-1.8829
TMEM199	4	0.00043458	0.0015868	0.043345	691	4	-2.4543	0.99957	0.99957	1	18356	0	-2.4543
AQP5	4	0.00043554	0.0015884	0.043345	692	4	-1.7474	0.99956	0.99957	1	18355	0	-1.7474
ZRSR2	4	0.00043639	0.0015926	0.043397	693	3	-1.5168	0.97025	0.97029	1	17045	0	-1.5168
URB2	4	0.00043746	0.0015962	0.043429	694	4	-2.798	0.99956	0.99956	1	18354	0	-2.798
DDX49	4	0.00043858	0.0015983	0.043429	695	4	-3.4637	0.99956	0.99956	1	18353	0	-3.4637
WDR70	4	0.00044494	0.0016272	0.044149	696	3	-1.9211	0.10913	0.23188	0.90613	4822	1	-1.9211
SNRPA1	4	0.00044872	0.0016445	0.044554	697	4	-3.4587	0.99928	0.99929	1	18285	0	-3.4587
EXOSC3	4	0.00044926	0.0016487	0.044597	698	3	-4.521	0.80704	0.8107	1	14065	1	-4.521
MCM3	4	0.00044962	0.0016508	0.044597	699	4	-2.0462	0.99647	0.9965	1	17948	0	-2.0462
EIF3C	4	0.00045036	0.0016555	0.044604	700	4	-4.1469	0.99952	0.99951	1	18341	0	-4.1469
PSMC5	4	0.00045051	0.0016571	0.044604	701	4	-2.3052	0.99955	0.99955	1	18350	0	-2.3052
GOLGA6L1	4	0.00045107	0.0016581	0.044604	702	4	-2.5606	0.99895	0.99894	1	18207	0	-2.5606
NDUFV1	4	0.00045506	0.0016728	0.044935	703	4	-1.9522	0.98822	0.98823	1	17550	0	-1.9522
SNRPC	4	0.00045718	0.0016796	0.045054	704	4	-1.3869	0.99954	0.99954	1	18349	0	-1.3869
TRIM43	4	0.00046274	0.0016985	0.045495	705	3	-1.6431	0.011791	0.039051	0.702767	1047	1	-1.6431
THG1L	4	0.00046977	0.0017273	0.046193	706	4	-2.6467	0.99382	0.99386	1	17808	0	-2.6467
EMG1	4	0.00047024	0.0017294	0.046193	707	4	-1.6878	0.99953	0.99953	1	18348	0	-1.6878
GOLGA6L10	4	0.00047312	0.0017378	0.046305	708	4	-2.2639	0.99953	0.99953	1	18346	0	-2.2639
NDUFB4	4	0.00047387	0.0017399	0.046305	709	3	-2.5203	0.92193	0.92206	1	16044	0	-2.5203
C19orf53	4	0.00047431	0.001741	0.046305	710	4	-1.8706	0.99953	0.99952	1	18345	0	-1.8706
HMBS	4	0.00047517	0.0017452	0.046351	711	4	-1.846	0.99952	0.99952	1	18344	0	-1.846
FAM25C	4	0.00047687	0.0017493	0.046397	712	4	-1.849	0.99952	0.99952	1	18343	0	-1.849
MLST8	4	0.00048125	0.0017646	0.046735	713	4	-1.5525	0.99952	0.99952	1	18342	0	-1.5525
EXOSC5	4	0.00048441	0.0017766	0.046898	714	4	-2.9655	0.99725	0.99724	1	18013	0	-2.9655
PELP1	4	0.00048496	0.0017771	0.046898	715	4	-1.4072	0.99952	0.99951	1	18340	0	-1.4072
TSEN2	4	0.00048566	0.0017782	0.046898	716	4	-1.2341	0.99951	0.99951	1	18339	0	-1.2341
NFS1	4	0.00048783	0.0017845	0.046992	717	3	-3.7133	0.97514	0.97528	1	17171	0	-3.7133
ARPC2	4	0.00048896	0.0017876	0.046992	718	4	-1.1659	0.99951	0.99951	1	18338	0	-1.1659
PHF12	4	0.00048939	0.0017892	0.046992	719	4	-1.7431	0.99951	0.99951	1	18337	0	-1.7431
RPL18A	4	0.00049096	0.0017971	0.047133	720	4	-3.8851	0.99951	0.99951	1	18336	0	-3.8851
SNIP1	4	0.00049626	0.0018154	0.047548	721	4	-1.7639	0.99697	0.997	1	17985	0	-1.7639
HMGB1	4	0.0004972	0.0018217	0.047643	722	4	-1.4119	0.9995	0.9995	1	18335	0	-1.4119
TXNRD1	4	0.00049973	0.0018306	0.047643	723	3	-2.2517	0.10397	0.22284	0.904916	4644	1	-2.2517
PSMD2	4	0.00050012	0.0018311	0.047643	724	4	-2.5595	0.99257	0.9926	1	17746	0	-2.5595
POM121C	4	0.00050028	0.0018317	0.047643	725	3	-1.717	0.81494	0.8174	1	14183	1	-1.717
SLC7A6OS	4	0.00050051	0.0018317	0.047643	726	4	-1.4395	0.99879	0.99878	1	18184	0	-1.4395
CAPZB	4	0.00050198	0.0018395	0.047717	727	4	-2.3565	0.9995	0.9995	1	18334	0	-2.3565
DNTTIP2	4	0.00050206	0.0018395	0.047717	728	4	-1.7854	0.99838	0.99837	1	18130	0	-1.7854
SDHAF1	4	0.00050501	0.0018458	0.047749	729	4	-1.3983	0.99949	0.9995	1	18333	0	-1.3983
ASUN	4	0.00050517	0.0018458	0.047749	730	4	-1.9774	0.98826	0.98827	1	17553	0	-1.9774
BCS1L	4	0.00050814	0.0018547	0.047913	731	4	-2.7875	0.99949	0.99949	1	18332	0	-2.7875
TINF2	4	0.00051026	0.0018589	0.047956	732	4	-3.3599	0.99576	0.99574	1	17912	0	-3.3599
PIK3C3	4	0.00051183	0.0018705	0.048136	733	4	-1.3467	0.99896	0.99895	1	18209	0	-1.3467
SMC3	4	0.00051201	0.001871	0.048136	734	4	-2.1712	0.99949	0.99949	1	18331	0	-2.1712
NOLC1	4	0.00051599	0.0018846	0.048421	735	4	-2.4956	0.99948	0.99949	1	18330	0	-2.4956
PPIE	4	0.00051899	0.0018967	0.048664	736	4	-1.5315	0.99948	0.99949	1	18329	0	-1.5315
PPAT	4	0.00052348	0.0019135	0.049028	737	4	-2.106	0.9883	0.98831	1	17557	0	-2.106
HAUS7	4	0.00052611	0.0019208	0.049083	738	4	-1.5127	0.99242	0.99244	1	17737	0	-1.5127
DNAJC11	4	0.00052631	0.0019208	0.049083	739	4	-1.2004	0.99947	0.99948	1	18328	0	-1.2004
MIPEP	4	0.00052714	0.0019245	0.04911	740	4	-1.9595	0.99947	0.99948	1	18327	0	-1.9595
GEMIN4	4	0.00052972	0.0019318	0.049231	741	4	-1.8864	0.99831	0.9983	1	18122	0	-1.8864
MRPL44	4	0.00053053	0.001935	0.049245	742	4	-2.1447	0.9985	0.99847	1	18146	0	-2.1447
RPL36AL	4	0.00053177	0.0019407	0.049325	743	4	-1.2745	0.99947	0.99948	1	18326	0	-1.2745
FDX1	4	0.00054054	0.0019706	0.050017	744	4	-3.0676	0.99946	0.99947	1	18325	0	-3.0676
DDX23	4	0.00054261	0.0019764	0.050041	745	4	-1.8481	0.99946	0.99947	1	18324	0	-1.8481
PPCS	4	0.0005431	0.0019769	0.050041	746	3	-1.9219	0.42939	0.57741	1	10415	1	-1.9219
IK	4	0.00054431	0.0019811	0.050041	747	4	-1.5575	0.99946	0.99947	1	18323	0	-1.5575
QRSL1	4	0.0005445	0.0019821	0.050041	748	4	-2.0105	0.99946	0.99947	1	18322	0	-2.0105
MCM6	4	0.00054679	0.0019916	0.050212	749	3	-2.4726	0.19447	0.34669	0.971358	6740	1	-2.4726
COPZ1	4	0.00054802	0.0019952	0.050238	750	3	-1.8468	0.70385	0.73791	1	12882	1	-1.8468
ZBTB11	4	0.00054967	0.002	0.050289	751	3	-1.7897	0.092545	0.20291	0.894451	4282	1	-1.7897
SF3B3	4	0.00055173	0.0020094	0.05046	752	3	-2.1908	0.93811	0.93813	1	16361	0	-2.1908
TBL1XR1	4	0.00055726	0.0020325	0.050943	753	4	-2.4742	0.99944	0.99945	1	18320	0	-2.4742
MRPL20	4	0.00055754	0.002034	0.050943	754	3	-5.2582	0.9496	0.94964	1	16580	0	-5.2582
DDX46	4	0.00055899	0.0020388	0.050952	755	4	-2.5324	0.99597	0.99595	1	17920	0	-2.5324
NFU1	4	0.00055919	0.0020398	0.050952	756	4	-0.92297	0.99944	0.99945	1	18319	0	-0.92297
PRPF3	4	0.00056054	0.0020477	0.051081	757	4	-1.5535	0.99944	0.99945	1	18318	0	-1.5535
INTS8	4	0.0005617	0.0020534	0.051142	758	4	-1.8568	0.99944	0.99945	1	18317	0	-1.8568
ANAPC2	4	0.00056212	0.0020555	0.051142	759	3	-2.0966	0.37214	0.52097	1	9495	1	-2.0966
RPUSD4	4	0.00056383	0.0020629	0.051257	760	4	-1.6624	0.99944	0.99945	1	18316	0	-1.6624
NAA25	4	0.00056505	0.0020718	0.051411	761	3	-1.9301	0.84011	0.84016	1	14569	1	-1.9301
RPP30	4	0.00056758	0.0020839	0.051642	762	4	-2.3252	0.99408	0.99412	1	17823	0	-2.3252
TP53TG3B	4	0.00056926	0.0020896	0.051715	763	3	-2.7047	0.96838	0.96842	1	17010	0	-2.7047
COA3	4	0.00056967	0.0020922	0.051715	764	4	-1.1242	0.99943	0.99944	1	18314	0	-1.1242
SUPT6H	4	0.00057095	0.0020954	0.051725	765	4	-2.1958	0.99915	0.99914	1	18248	0	-2.1958
TOMM70A	4	0.00057545	0.002108	0.051967	766	4	-1.7996	0.99942	0.99944	1	18313	0	-1.7996
GTPBP4	4	0.00057901	0.0021206	0.052154	767	4	-2.6928	0.99139	0.99142	1	17691	0	-2.6928
DAP3	4	0.00057944	0.0021221	0.052154	768	3	-1.9887	0.73032	0.75446	1	13155	1	-1.9887
TMEM41B	4	0.00058029	0.0021247	0.052154	769	3	-1.7176	0.48347	0.63085	1	11235	1	-1.7176
CTU2	4	0.00058188	0.0021266	0.052154	770	4	-2.1579	0.99942	0.99943	1	18312	0	-2.1579
RAB6A	4	0.00058685	0.0021426	0.052478	771	2	-0.92672	0.089289	0.19705	0.892179	4166	2	-0.92672
DDX6	4	0.00058996	0.002152	0.052641	772	3	-1.4811	0.38656	0.53508	1	9745	1	-1.4811
LSG1	4	0.00059233	0.0021599	0.052765	773	3	-1.8152	0.95481	0.95484	1	16684	0	-1.8152
BIRC5	4	0.00059489	0.0021677	0.052888	774	4	-3.5851	0.99941	0.99942	1	18311	0	-3.5851
KIAA0391	4	0.00059671	0.002174	0.052973	775	4	-3.0983	0.9994	0.99942	1	18310	0	-3.0983
CSE1L	4	0.00060036	0.0021887	0.053262	776	4	-3.109	0.9994	0.99942	1	18309	0	-3.109
RRM2	4	0.00060097	0.0021919	0.05327	777	4	-2.1055	0.9994	0.99942	1	18308	0	-2.1055
GOLGA8K	4	0.00060541	0.002206	0.053528	778	4	-1.4646	0.9991	0.99909	1	18234	0	-1.4646
UTP11L	4	0.00060607	0.0022081	0.053528	779	4	-1.906	0.99939	0.99941	1	18307	0	-1.906
SMN2	4	0.00061334	0.0022359	0.054132	780	3	-2.0954	0.84781	0.84767	1	14699	1	-2.0954
SBDS	4	0.00061409	0.0022396	0.054151	781	4	-1.3361	0.99939	0.9994	1	18306	0	-1.3361
BARD1	4	0.0006171	0.0022516	0.054373	782	4	-1.3531	0.99938	0.9994	1	18305	0	-1.3531
U2SURP	4	0.00062011	0.0022632	0.054582	783	4	-1.0766	0.99938	0.99939	1	18304	0	-1.0766
MED4	4	0.00062224	0.0022705	0.054657	784	4	-2.0862	0.99929	0.99931	1	18288	0	-2.0862
CHTOP	4	0.00062376	0.0022721	0.054657	785	4	-0.92765	0.99938	0.99939	1	18302	0	-0.92765
PPP1R11	4	0.00063258	0.0023035	0.055344	786	3	-2.2671	0.63449	0.69923	1	12323	1	-2.2671
RPL34	4	0.00063355	0.0023067	0.055349	787	4	-2.5102	0.99937	0.99938	1	18301	0	-2.5102
BZRAP1	4	0.00063545	0.0023145	0.055467	788	4	-1.5066	0.99936	0.99938	1	18300	0	-1.5066
ISCA1	4	0.00063753	0.0023206	0.055527	789	3	-2.9912	0.97429	0.97441	1	17148	0	-2.9912
EP400	4	0.00063802	0.0023229	0.055527	790	4	-1.5427	0.99671	0.99674	1	17967	0	-1.5427
LSM11	4	0.00064029	0.0023298	0.05562	791	4	-1.3829	0.99079	0.99078	1	17657	0	-1.3829
GLTSCR2	4	0.00064505	0.0023465	0.055949	792	4	-2.2182	0.99935	0.99937	1	18298	0	-2.2182
KRTAP10-12	4	0.00064774	0.0023565	0.056058	793	4	-1.594	0.99935	0.99937	1	18297	0	-1.594
MRPL15	4	0.00064807	0.002357	0.056058	794	4	-2.1575	0.99915	0.99914	1	18247	0	-2.1575
PFAS	4	0.00065037	0.0023649	0.05612	795	4	-2.8198	0.98651	0.98647	1	17507	0	-2.8198
NCAPD2	4	0.00065194	0.002368	0.05612	796	4	-1.7663	0.99935	0.99936	1	18296	0	-1.7663
MVD	4	0.00065216	0.0023686	0.05612	797	3	-1.7666	0.48027	0.6278	1	11178	1	-1.7666
WNK1	4	0.00065498	0.0023811	0.056348	798	4	-3.0624	0.99924	0.99925	1	18276	0	-3.0624
RBMX	4	0.00065822	0.0023932	0.056562	799	3	-1.4524	0.97805	0.97819	1	17239	0	-1.4524
EIF5A	4	0.00066446	0.0024142	0.056986	800	4	-3.1358	0.99934	0.99935	1	18295	0	-3.1358
RAD51C	4	0.00066721	0.0024247	0.057162	801	4	-1.367	0.99933	0.99935	1	18293	0	-1.367
URI1	4	0.0006686	0.002432	0.057264	802	4	-1.5587	0.99793	0.99792	1	18078	0	-1.5587
SRP14	4	0.0006727	0.002443	0.057452	803	4	-2.0334	0.99621	0.99621	1	17930	0	-2.0334
POLR2A	4	0.00068543	0.0024933	0.058562	804	4	-1.7131	0.99931	0.99933	1	18292	0	-1.7131
WDR20	4	0.00068739	0.0025007	0.058662	805	4	-1.3601	0.99918	0.99918	1	18257	0	-1.3601
ATP5B	4	0.00069163	0.0025148	0.058921	806	4	-1.2184	0.99931	0.99932	1	18290	0	-1.2184
MTHFD1L	4	0.00069987	0.0025431	0.05951	807	3	-2.2291	0.95121	0.95126	1	16624	0	-2.2291
NCBP1	4	0.00070812	0.0025767	0.060146	808	4	-1.6483	0.99909	0.99909	1	18232	0	-1.6483
UBE2K	4	0.00070816	0.0025767	0.060146	809	4	-1.8122	0.99929	0.99931	1	18289	0	-1.8122
GOLGA6C	4	0.0007123	0.0025961	0.060524	810	4	-1.7704	0.99838	0.99836	1	18128	0	-1.7704
HIST1H1A	4	0.0007152	0.002605	0.060557	811	3	-0.85724	0.97815	0.97829	1	17244	0	-0.85724
RAD51D	4	0.00071647	0.0026066	0.060557	812	4	-2.3326	0.99928	0.9993	1	18287	0	-2.3326
VPS52	4	0.00071694	0.0026071	0.060557	813	4	-1.913	0.99928	0.9993	1	18286	0	-1.913
ANKRD20A1	4	0.00071914	0.0026145	0.060653	814	4	-1.6848	0.98417	0.98415	1	17422	0	-1.6848
RPS25	4	0.00072035	0.0026186	0.060674	815	4	-3.7175	0.98919	0.98919	1	17595	0	-3.7175
GUK1	4	0.00072101	0.0026218	0.060674	816	4	-2.7061	0.99928	0.99929	1	18284	0	-2.7061
NDUFAF7	4	0.00072207	0.002626	0.060697	817	3	-2.4483	0.61188	0.68778	1	12129	1	-2.4483
URGCP-MRPS24	4	0.00072528	0.0026339	0.060775	818	3	-1.7889	0.9703	0.97034	1	17048	0	-1.7889
ACTR10	4	0.00072627	0.002638	0.060775	819	4	-2.0195	0.99372	0.99375	1	17805	0	-2.0195
TUBA1C	4	0.00072674	0.0026407	0.060775	820	4	-1.2107	0.99927	0.99928	1	18283	0	-1.2107
COQ2	4	0.00072721	0.0026422	0.060775	821	4	-2.2705	0.99927	0.99928	1	18282	0	-2.2705
ABHD8	4	0.00073688	0.0026816	0.061604	822	4	-1.2662	0.99926	0.99927	1	18281	0	-1.2662
NCL	4	0.00073973	0.0026873	0.061611	823	4	-1.3125	0.99926	0.99927	1	18280	0	-1.3125
SLC25A26	4	0.0007402	0.0026884	0.061611	824	4	-1.6667	0.99926	0.99927	1	18279	0	-1.6667
MRPL3	4	0.00074347	0.0026978	0.061677	825	3	-2.2473	0.59407	0.67901	1	11991	1	-2.2473
NBPF4	4	0.00074354	0.0026978	0.061677	826	4	-0.71461	0.99926	0.99926	1	18278	0	-0.71461
THAP11	4	0.00074473	0.0027015	0.061687	827	4	-1.3705	0.99556	0.99555	1	17904	0	-1.3705
OGDH	4	0.00075078	0.0027246	0.062138	828	3	-2.1233	0.85536	0.85524	1	14823	0	-2.1233
AFG3L2	4	0.00075209	0.0027308	0.062152	829	4	-2.0762	0.99128	0.9913	1	17686	0	-2.0762
RBBP4	4	0.0007523	0.0027324	0.062152	830	4	-2.4113	0.99677	0.9968	1	17970	0	-2.4113
SRM	4	0.00075337	0.002735	0.062152	831	4	-1.5138	0.99925	0.99925	1	18277	0	-1.5138
RPL37A	4	0.0007561	0.0027455	0.062316	832	4	-3.8063	0.99134	0.99136	1	17689	0	-3.8063
CDC23	4	0.00076452	0.0027759	0.062855	833	3	-2.5664	0.939	0.93904	1	16377	0	-2.5664
BCL2L2-PABPN1	4	0.00076476	0.0027759	0.062855	834	4	-2.5383	0.99924	0.99924	1	18275	0	-2.5383
ALYREF	4	0.00076618	0.0027812	0.062898	835	3	-2.7235	0.91969	0.91978	1	15994	0	-2.7235
ANKRD20A4	4	0.00076816	0.0027885	0.062989	836	2	-0.26805	0.048425	0.12057	0.820506	2775	2	-0.26805
SDHD	4	0.00077136	0.002799	0.06315	837	4	-2.1615	0.99923	0.99923	1	18273	0	-2.1615
PIAS4	4	0.00077505	0.0028116	0.063356	838	4	-1.287	0.99922	0.99922	1	18272	0	-1.287
FDXR	4	0.00077751	0.0028179	0.063356	839	4	-2.3489	0.99922	0.99922	1	18271	0	-2.3489
EMC3	4	0.0007779	0.0028184	0.063356	840	4	-2.4013	0.99856	0.99853	1	18152	0	-2.4013
CNOT1	4	0.00077861	0.0028216	0.063356	841	4	-1.878	0.98853	0.98854	1	17565	0	-1.878
COX4I1	4	0.0007806	0.0028294	0.063457	842	4	-1.8718	0.99922	0.99922	1	18270	0	-1.8718
DAD1	4	0.00078345	0.0028373	0.063558	843	4	-2.8673	0.99922	0.99922	1	18269	0	-2.8673
EARS2	4	0.00078829	0.0028546	0.06387	844	4	-2.0343	0.99849	0.99846	1	18145	0	-2.0343
UPK3BL	4	0.00079844	0.0028939	0.064643	845	4	-1.302	0.9992	0.9992	1	18265	0	-1.302
HINFP	4	0.00079945	0.002896	0.064643	846	4	-1.6557	0.9992	0.9992	1	18264	0	-1.6557
RPE	4	0.00080172	0.0029065	0.064801	847	4	-1.4277	0.9992	0.9992	1	18263	0	-1.4277
UBE2Q2L	4	0.00080476	0.0029138	0.064888	848	4	-1.7698	0.9992	0.99919	1	18262	0	-1.7698
ZNF217	4	0.00080983	0.0029254	0.065068	849	4	-1.8148	0.99919	0.99919	1	18261	0	-1.8148
MARS2	4	0.00081442	0.0029411	0.065341	850	4	-1.7767	0.99919	0.99918	1	18259	0	-1.7767
PFDN2	4	0.00081629	0.0029448	0.065345	851	3	-2.3846	0.97096	0.97103	1	17070	0	-2.3846
ETF1	4	0.00081864	0.0029532	0.065455	852	4	-3.915	0.99918	0.99918	1	18258	0	-3.915
SNRPE	4	0.00082164	0.0029642	0.065591	853	3	-1.4849	0.87029	0.87019	1	15091	0	-1.4849
RFC5	4	0.00082218	0.0029663	0.065591	854	3	-3.3993	0.94908	0.9491	1	16573	0	-3.3993
ATP1B3	4	0.00082513	0.0029783	0.065781	855	3	-1.833	0.97922	0.97933	1	17277	0	-1.833
FAM96B	4	0.00082809	0.0029872	0.065901	856	4	-4.2351	0.99802	0.99801	1	18093	0	-4.2351
FAM60A	4	0.00083012	0.0029967	0.066028	857	4	-1.0768	0.99917	0.99917	1	18254	0	-1.0768
SOD1	4	0.00083141	0.0030003	0.066028	858	4	-2.5637	0.99917	0.99917	1	18253	0	-2.5637
LRP10	4	0.00083193	0.0030035	0.066028	859	4	-0.94043	0.99917	0.99917	1	18252	0	-0.94043
MBD6	4	0.00083323	0.0030072	0.066032	860	4	-1.2783	0.99917	0.99916	1	18251	0	-1.2783
CPSF2	4	0.00084341	0.003047	0.066829	861	4	-1.5908	0.99916	0.99915	1	18250	0	-1.5908
NMD3	4	0.00084578	0.003057	0.06697	862	4	-1.9351	0.99915	0.99915	1	18249	0	-1.9351
DYNC1H1	4	0.00084711	0.0030654	0.067075	863	3	-2.0297	0.69922	0.73517	1	12846	1	-2.0297
C1QBP	4	0.00085095	0.0030758	0.067227	864	3	-1.8095	0.95352	0.95355	1	16659	0	-1.8095
RBM19	4	0.00085507	0.0030921	0.067504	865	4	-1.9042	0.99671	0.99674	1	17966	0	-1.9042
MED12	4	0.00086299	0.003123	0.068101	866	4	-1.8153	0.99914	0.99913	1	18243	0	-1.8153
CHAF1B	4	0.00086753	0.0031409	0.06841	867	4	-1.6641	0.99913	0.99913	1	18242	0	-1.6641
NUBP2	4	0.00087183	0.0031561	0.068662	868	4	-1.4112	0.99913	0.99912	1	18241	0	-1.4112
EIF3E	4	0.00087477	0.0031676	0.068789	869	4	-1.5198	0.9989	0.99888	1	18198	0	-1.5198
NUDT19	4	0.00087533	0.0031692	0.068789	870	4	-1.2894	0.99912	0.99912	1	18240	0	-1.2894
NUBP1	4	0.00088766	0.00322	0.069812	871	4	-1.8829	0.99911	0.99911	1	18239	0	-1.8829
TAF6	4	0.00088971	0.0032274	0.069812	872	4	-1.5783	0.99911	0.99911	1	18237	0	-1.5783
EIF2B5	4	0.00089012	0.0032274	0.069812	873	4	-2.9938	0.99911	0.9991	1	18236	0	-2.9938
AGPAT3	4	0.00089258	0.0032331	0.069856	874	4	-1.0219	0.99911	0.9991	1	18235	0	-1.0219
ANAPC5	4	0.00090496	0.0032662	0.070489	875	4	-1.5362	0.9991	0.99909	1	18233	0	-1.5362
SRRT	4	0.00090701	0.0032704	0.070499	876	4	-2.8347	0.99714	0.99715	1	18002	0	-2.8347
PRC1	4	0.00091221	0.0032908	0.070857	877	4	-2.5807	0.9933	0.99332	1	17776	0	-2.5807
RABL2A	4	0.0009137	0.0032945	0.070857	878	4	-1.2635	0.99909	0.99908	1	18231	0	-1.2635
SLC2A1	4	0.00092068	0.0033233	0.071396	879	4	-1.1392	0.99908	0.99907	1	18230	0	-1.1392
ZNF324	4	0.00092714	0.003348	0.071841	880	4	-0.71581	0.99907	0.99907	1	18229	0	-0.71581
TRIM49C	4	0.00092855	0.0033516	0.071841	881	4	-1.0146	0.99907	0.99906	1	18228	0	-1.0146
NSA2	4	0.00093363	0.003371	0.072105	882	4	-1.9677	0.99907	0.99906	1	18226	0	-1.9677
ARL17A	4	0.00093406	0.0033715	0.072105	883	4	-1.3467	0.99907	0.99906	1	18225	0	-1.3467
SYS1	4	0.00093476	0.0033757	0.072113	884	4	-2.2516	0.99816	0.99816	1	18105	0	-2.2516
MEPCE	4	0.00094172	0.0033967	0.072441	885	4	-1.8461	0.99906	0.99905	1	18224	0	-1.8461
COPS6	4	0.00094301	0.0033988	0.072441	886	4	-1.4163	0.99906	0.99905	1	18223	0	-1.4163
SDHC	4	0.00094501	0.0034088	0.072572	887	3	-2.4289	0.78152	0.79041	1	13725	1	-2.4289
ATP6V0D1	4	0.00094801	0.0034182	0.072691	888	4	-2.5936	0.99905	0.99905	1	18222	0	-2.5936
POM121	4	0.00095415	0.0034413	0.073099	889	4	-1.7274	0.99651	0.99654	1	17949	0	-1.7274
HOXC5	4	0.00095648	0.0034528	0.073262	890	4	-0.89003	0.99904	0.99904	1	18221	0	-0.89003
CBWD3	4	0.0009583	0.0034607	0.073346	891	4	-2.2023	0.98578	0.98575	1	17482	0	-2.2023
SLC25A22	4	0.00096632	0.0034869	0.073819	892	4	-0.96395	0.99903	0.99903	1	18220	0	-0.96395
SDE2	4	0.00096806	0.0034921	0.073847	893	4	-1.707	0.99903	0.99902	1	18219	0	-1.707
UBA2	4	0.00096962	0.0034984	0.073897	894	4	-1.8713	0.99659	0.99663	1	17955	0	-1.8713
NOL9	4	0.00097261	0.0035068	0.073992	895	3	-2.8581	0.9782	0.97834	1	17247	0	-2.8581
PRAMEF5	4	0.00097501	0.0035147	0.07407	896	3	-1.9443	0.41849	0.56657	1	10232	1	-1.9443
DAZAP2	4	0.00097623	0.0035184	0.07407	897	4	-1.0274	0.99902	0.99902	1	18218	0	-1.0274
RPAP2	4	0.00098342	0.003543	0.074506	898	4	-2.1169	0.99902	0.99901	1	18217	0	-2.1169
GTF2B	4	0.00099539	0.003586	0.075326	899	4	-2.0429	0.999	0.999	1	18215	0	-2.0429
ATP6V1A	4	0.00099777	0.0035944	0.075418	900	4	-1.7851	0.999	0.99899	1	18214	0	-1.7851
C1orf109	4	0.001009	0.0036368	0.076224	901	4	-2.8111	0.99543	0.99542	1	17893	0	-2.8111
SPDYE2B	4	0.0010115	0.0036437	0.076283	902	4	-3.0689	0.99847	0.99844	1	18141	0	-3.0689
ZCRB1	4	0.0010152	0.0036552	0.076439	903	4	-1.6948	0.99246	0.99248	1	17740	0	-1.6948
PLRG1	4	0.0010182	0.0036694	0.07658	904	3	-2.0555	0.97927	0.97938	1	17279	0	-2.0555
TPT1	4	0.0010197	0.0036735	0.07658	905	4	-1.7251	0.99898	0.99897	1	18212	0	-1.7251
RPL7L1	4	0.0010201	0.0036741	0.07658	906	3	-1.7863	0.30506	0.45511	1	8419	1	-1.7863
NDUFB8	4	0.0010309	0.0037176	0.077396	907	4	-1.5319	0.99897	0.99896	1	18211	0	-1.5319
GCLC	4	0.0010328	0.0037249	0.077396	908	3	-1.625	0.080115	0.18029	0.882448	3855	1	-1.625
SMC4	4	0.0010335	0.0037286	0.077396	909	3	-2.6955	0.80687	0.81057	1	14059	1	-2.6955
DUSP22	4	0.0010336	0.0037296	0.077396	910	4	-1.37	0.99897	0.99895	1	18210	0	-1.37
GINS3	4	0.0010394	0.003748	0.077692	911	3	-1.9256	0.50752	0.64057	1	11387	1	-1.9256
SLC7A1	4	0.0010413	0.0037569	0.077749	912	4	-1.8257	0.98351	0.98349	1	17399	0	-1.8257
SBNO1	4	0.0010419	0.003759	0.077749	913	3	-4.0363	0.97058	0.97063	1	17055	0	-4.0363
BCL7A	4	0.001045	0.0037758	0.078011	914	4	-0.85988	0.99896	0.99894	1	18208	0	-0.85988
RPIA	4	0.0010488	0.0037884	0.078132	915	3	-2.7378	0.72412	0.75054	1	13095	1	-2.7378
RPL22	4	0.0010494	0.0037899	0.078132	916	3	-1.8439	0.47208	0.61958	1	11060	1	-1.8439
RNF40	4	0.0010551	0.0038162	0.078534	917	4	-2.3755	0.99783	0.99783	1	18066	0	-2.3755
PKMYT1	4	0.0010557	0.0038177	0.078534	918	4	-1.8168	0.99894	0.99893	1	18206	0	-1.8168
HNRNPA1	4	0.0010586	0.0038272	0.078612	919	4	-1.4749	0.99807	0.99807	1	18096	0	-1.4749
SUCLA2	4	0.0010595	0.0038308	0.078612	920	4	-2.9538	0.98248	0.98248	1	17367	0	-2.9538
SHMT2	4	0.0010602	0.003835	0.078612	921	4	-2.0273	0.99772	0.99773	1	18057	0	-2.0273
RRP9	4	0.0010614	0.0038382	0.078612	922	4	-2.0136	0.99801	0.998	1	18089	0	-2.0136
CGB1	4	0.0010652	0.0038513	0.078795	923	4	-1.6835	0.98839	0.9884	1	17562	0	-1.6835
STRAP	4	0.0010684	0.0038633	0.078956	924	4	-1.6976	0.99843	0.99841	1	18136	0	-1.6976
NARS	4	0.0010831	0.0039197	0.079951	925	4	-2.9447	0.99742	0.99741	1	18028	0	-2.9447
RASSF7	4	0.0010834	0.0039205	0.079951	926	4	-0.86764	0.99892	0.9989	1	18204	0	-0.86764
AHCTF1	4	0.001091	0.0039488	0.080442	927	4	-1.0087	0.99891	0.99889	1	18202	0	-1.0087
WDR46	4	0.0010942	0.0039588	0.080558	928	4	-2.9607	0.99891	0.99889	1	18201	0	-2.9607
NUP214	4	0.001099	0.0039803	0.080908	929	4	-2.6967	0.9989	0.99888	1	18200	0	-2.6967
MYBBP1A	4	0.0011032	0.0039944	0.081062	930	4	-1.5158	0.9989	0.99888	1	18199	0	-1.5158
MTOR	4	0.0011045	0.0039986	0.081062	931	3	-2.9137	0.95924	0.95928	1	16786	0	-2.9137
CPOX	4	0.0011051	0.0040007	0.081062	932	4	-1.3422	0.99889	0.99888	1	18197	0	-1.3422
USP36	4	0.0011209	0.0040516	0.082004	933	4	-1.1148	0.99888	0.99886	1	18196	0	-1.1148
UTP15	4	0.0011284	0.0040704	0.082298	934	4	-1.5719	0.99887	0.99886	1	18195	0	-1.5719
PCBP1	4	0.0011377	0.0041051	0.082863	935	4	-1.4613	0.99886	0.99885	1	18194	0	-1.4613
RBMY1E	4	0.0011382	0.0041071	0.082863	936	4	-1.0314	0.99886	0.99884	1	18193	0	-1.0314
RPN2	4	0.0011398	0.0041145	0.082922	937	4	-1.8453	0.99886	0.99884	1	18192	0	-1.8453
PNPT1	4	0.001144	0.0041302	0.083125	938	3	-1.3312	0.97413	0.97424	1	17145	0	-1.3312
MRPL57	4	0.0011454	0.0041334	0.083125	939	4	-2.8898	0.99764	0.99764	1	18049	0	-2.8898
BANF1	4	0.0011493	0.0041475	0.083228	940	3	-1.596	0.87204	0.87198	1	15117	0	-1.596
MED11	4	0.0011497	0.0041517	0.083228	941	3	-3.8428	0.70976	0.74145	1	12935	1	-3.8428
RBBP5	4	0.0011497	0.0041517	0.083228	942	4	-2.755	0.98532	0.98531	1	17460	0	-2.755
SHFM1	4	0.0011514	0.0041585	0.083276	943	4	-1.5362	0.99713	0.99713	1	18000	0	-1.5362
KRTAP4-2	4	0.001155	0.0041722	0.083461	944	4	-0.90737	0.99884	0.99883	1	18191	0	-0.90737
TACC3	4	0.0011574	0.004179	0.083509	945	4	-1.1132	0.99884	0.99882	1	18190	0	-1.1132
CXorf56	4	0.0011624	0.0041973	0.083787	946	4	-1.129	0.99884	0.99882	1	18189	0	-1.129
OSBPL9	4	0.0011647	0.0042057	0.083866	947	4	-1.889	0.99884	0.99882	1	18188	0	-1.889
EMC4	4	0.0011668	0.004212	0.083903	948	4	-1.6869	0.99851	0.99848	1	18148	0	-1.6869
FECH	4	0.0011756	0.0042414	0.084398	949	4	-1.8144	0.99723	0.99722	1	18011	0	-1.8144
EEF1A1	4	0.0011839	0.0042671	0.08482	950	4	-2.6708	0.99882	0.9988	1	18187	0	-2.6708
MRPS7	4	0.001192	0.0042959	0.085266	951	3	-1.2299	0.85827	0.85813	1	14874	0	-1.2299
PPIL2	4	0.0011929	0.0042985	0.085266	952	3	-3.8443	0.96367	0.96369	1	16890	0	-3.8443
SEC61A1	4	0.0012016	0.0043357	0.085879	953	4	-1.9235	0.99839	0.99837	1	18131	0	-1.9235
MRPS30	4	0.0012039	0.004342	0.085879	954	3	-1.3945	0.97535	0.97549	1	17180	0	-1.3945
TUBG1	4	0.0012039	0.0043431	0.085879	955	4	-2.2492	0.9988	0.99878	1	18185	0	-2.2492
ZFC3H1	4	0.0012087	0.0043583	0.08609	956	4	-1.2569	0.99879	0.99877	1	18183	0	-1.2569
SEC61B	4	0.0012201	0.0043945	0.086644	957	4	-1.1425	0.99878	0.99876	1	18182	0	-1.1425
DCST2	4	0.0012205	0.0043955	0.086644	958	4	-1.1851	0.99878	0.99876	1	18181	0	-1.1851
TRNAU1AP	4	0.0012305	0.0044306	0.087245	959	4	-1.194	0.99877	0.99875	1	18180	0	-1.194
RPL15	4	0.0012417	0.0044689	0.087907	960	3	-3.1065	0.9438	0.94388	1	16474	0	-3.1065
BTF3	4	0.0012466	0.0044818	0.087992	961	4	-0.91519	0.99875	0.99874	1	18179	0	-0.91519
PPP2CA	4	0.0012469	0.0044826	0.087992	962	3	-1.8708	0.35677	0.50584	1	9244	1	-1.8708
MYBL2	4	0.0012491	0.0044909	0.087996	963	4	-1.647	0.99875	0.99874	1	18178	0	-1.647
ANKRD24	4	0.0012494	0.0044925	0.087996	964	4	-0.98421	0.99875	0.99874	1	18177	0	-0.98421
NDUFB3	4	0.0012507	0.0044967	0.087996	965	3	-1.5427	0.71725	0.74616	1	13021	1	-1.5427
C9orf114	4	0.0012563	0.0045156	0.088274	966	4	-2.0311	0.99846	0.99843	1	18139	0	-2.0311
CWC22	4	0.0012579	0.0045229	0.088326	967	4	-1.9185	0.99874	0.99873	1	18176	0	-1.9185
NDUFA4L2	4	0.0012609	0.0045303	0.088378	968	4	-0.98698	0.99874	0.99872	1	18175	0	-0.98698
POMZP3	4	0.0012643	0.0045413	0.088471	969	4	-1.5635	0.99874	0.99872	1	18174	0	-1.5635
COX7C	4	0.0012653	0.0045444	0.088471	970	4	-1.8816	0.98218	0.98217	1	17355	0	-1.8816
CKAP5	4	0.0012703	0.0045649	0.088778	971	4	-2.3802	0.99628	0.9963	1	17937	0	-2.3802
HCFC1	4	0.0012732	0.0045754	0.08889	972	4	-2.3493	0.99873	0.99871	1	18173	0	-2.3493
UTP23	4	0.0012832	0.0046068	0.089409	973	3	-2.3192	0.743	0.7628	1	13299	1	-2.3192
RPL4	4	0.0012857	0.0046157	0.089489	974	3	-2.872	0.93603	0.93606	1	16314	0	-2.872
DNAJC9	4	0.0012871	0.0046204	0.089489	975	4	-2.2854	0.98177	0.98178	1	17345	0	-2.2854
EIF4G1	4	0.0012889	0.0046273	0.089489	976	4	-1.9554	0.99305	0.99307	1	17765	0	-1.9554
DDX11	4	0.0012899	0.0046299	0.089489	977	4	-2.3191	0.99871	0.99869	1	18172	0	-2.3191
ABCB7	4	0.0012915	0.0046351	0.089499	978	3	-2.4135	0.86355	0.86346	1	14958	0	-2.4135
HSD17B10	4	0.0012997	0.0046624	0.089933	979	4	-2.0387	0.9987	0.99868	1	18171	0	-2.0387
ALAD	4	0.0013077	0.0046902	0.090377	980	4	-2.1871	0.99864	0.99861	1	18159	0	-2.1871
NPIPA2	4	0.0013099	0.0046954	0.090386	981	3	-1.7507	0.092299	0.20246	0.894451	4269	1	-1.7507
RPS7	4	0.0013117	0.0047038	0.090402	982	3	-2.6475	0.79785	0.80318	1	13941	1	-2.6475
SENP6	4	0.0013124	0.004707	0.090402	983	4	-2.5076	0.99869	0.99866	1	18169	0	-2.5076
DOLK	4	0.0013144	0.0047106	0.090402	984	4	-1.7341	0.99869	0.99866	1	18168	0	-1.7341
ATP5H	4	0.0013188	0.0047243	0.090571	985	4	-1.8816	0.99868	0.99865	1	18166	0	-1.8816
COX10	4	0.0013201	0.0047305	0.0906	986	3	-1.3485	0.18755	0.33991	0.966181	6643	1	-1.3485
THAP3	4	0.0013231	0.0047437	0.090759	987	3	-1.042	0.78803	0.79541	1	13804	1	-1.042
MYL6	4	0.0013276	0.0047583	0.090884	988	4	-1.4207	0.99867	0.99864	1	18164	0	-1.4207
TP53TG3C	4	0.0013291	0.0047625	0.090884	989	4	-0.91693	0.99867	0.99864	1	18163	0	-0.91693
POLR1E	4	0.0013297	0.0047646	0.090884	990	3	-2.1335	0.8886	0.88857	1	15433	0	-2.1335
MRPS21	4	0.0013363	0.0047893	0.09122	991	4	-2.0838	0.99431	0.99434	1	17837	0	-2.0838
CCT8	4	0.0013377	0.0047919	0.09122	992	3	-1.5352	0.077973	0.17631	0.880085	3783	1	-1.5352
QARS	4	0.00134	0.0047977	0.091238	993	4	-2.7348	0.99402	0.99407	1	17820	0	-2.7348
USO1	4	0.0013458	0.0048171	0.091514	994	4	-1.5062	0.99865	0.99862	1	18161	0	-1.5062
SSSCA1	4	0.001351	0.0048354	0.091771	995	4	-1.0377	0.99865	0.99861	1	18160	0	-1.0377
THOC5	4	0.0013607	0.0048737	0.092404	996	4	-0.82625	0.99864	0.9986	1	18158	0	-0.82625
PSMA3	4	0.0013634	0.0048815	0.092461	997	3	-2.5219	0.94718	0.94722	1	16538	0	-2.5219
TOMM40	4	0.0013758	0.0049214	0.093122	998	4	-1.923	0.99808	0.99808	1	18097	0	-1.923
NAMPT	4	0.0013788	0.0049345	0.093262	999	3	-2.0555	0.94193	0.94198	1	16433	0	-2.0555
ELP4	4	0.0013804	0.0049387	0.093262	1000	4	-1.5416	0.99862	0.99859	1	18157	0	-1.5416
NDUFB9	4	0.0013878	0.0049623	0.093614	1001	4	-2.6701	0.98864	0.98865	1	17569	0	-2.6701
RPS19BP1	4	0.0013924	0.004978	0.093817	1002	3	-1.9197	0.97245	0.97256	1	17109	0	-1.9197
XRN2	4	0.0013946	0.004988	0.093911	1003	4	-2.6862	0.99261	0.99264	1	17748	0	-2.6862
DR1	4	0.0013964	0.0049943	0.093936	1004	3	-1.1958	0.94604	0.94606	1	16513	0	-1.1958
RPL35	4	0.0014017	0.0050168	0.094246	1005	4	-1.942	0.9986	0.99856	1	18156	0	-1.942
SPDYE5	4	0.0014036	0.0050226	0.094246	1006	4	-1.5365	0.99769	0.99769	1	18053	0	-1.5365
NPLOC4	4	0.0014052	0.0050257	0.094246	1007	4	-1.98	0.99859	0.99856	1	18155	0	-1.98
GTF2H3	4	0.0014083	0.0050367	0.094315	1008	4	-1.6607	0.99148	0.99152	1	17696	0	-1.6607
ANKRD49	4	0.0014087	0.0050394	0.094315	1009	4	-2.1849	0.99859	0.99855	1	18154	0	-2.1849
TGFBR3L	4	0.0014267	0.0051033	0.095352	1010	4	-1.557	0.99014	0.99012	1	17636	0	-1.557
RPF1	4	0.0014275	0.0051049	0.095352	1011	3	-2.4916	0.59922	0.68152	1	12031	1	-2.4916
ZNF384	4	0.0014354	0.0051374	0.095864	1012	4	-0.82121	0.99856	0.99853	1	18153	0	-0.82121
BANP	4	0.0014395	0.0051474	0.095956	1013	3	-1.8142	0.91729	0.91733	1	15957	0	-1.8142
GTF3A	4	0.0014515	0.0051815	0.09644	1014	4	-2.0406	0.9818	0.98181	1	17346	0	-2.0406
TMEM104	4	0.0014523	0.0051835	0.09644	1015	3	-1.2287	0.95904	0.95907	1	16783	0	-1.2287
RNGTT	4	0.0014605	0.0052129	0.09689	1016	4	-1.4631	0.99409	0.99413	1	17824	0	-1.4631
POLR1D	4	0.0014656	0.0052307	0.097099	1017	3	-1.9582	0.90202	0.90201	1	15659	0	-1.9582
TUBB	4	0.0014662	0.0052344	0.097099	1018	4	-2.9341	0.99827	0.99826	1	18116	0	-2.9341
INTS3	4	0.0014721	0.0052528	0.097344	1019	4	-1.3645	0.99853	0.99849	1	18150	0	-1.3645
TOP1	4	0.0014742	0.0052601	0.097384	1020	4	-1.6342	0.98775	0.98775	1	17533	0	-1.6342
TSEN15	4	0.0014774	0.0052695	0.097463	1021	4	-2.6167	0.9968	0.99683	1	17974	0	-2.6167
FBXO11	4	0.0014817	0.0052847	0.097649	1022	4	-1.4398	0.99852	0.99848	1	18149	0	-1.4398
G6PD	4	0.0014845	0.0052942	0.097728	1023	4	-1.0957	0.9975	0.99748	1	18034	0	-1.0957
UTP6	4	0.0014872	0.0053041	0.097816	1024	4	-2.3875	0.99624	0.99625	1	17932	0	-2.3875
ATXN2L	4	0.001497	0.0053377	0.098291	1025	4	-1.4149	0.9985	0.99847	1	18147	0	-1.4149
RBM22	4	0.0015011	0.0053524	0.098417	1026	3	-2.5256	0.70814	0.7405	1	12920	1	-2.5256
PGK1	4	0.0015053	0.0053676	0.098601	1027	4	-2.2433	0.99644	0.99646	1	17946	0	-2.2433
CHCHD1	4	0.001512	0.005399	0.099034	1028	4	-0.99478	0.99849	0.99846	1	18144	0	-0.99478
COQ7	4	0.0015131	0.0054022	0.099034	1029	3	-1.2941	0.8938	0.89372	1	15509	0	-1.2941
PSMD4	4	0.0015147	0.0054069	0.099034	1030	3	-2.0266	0.015515	0.050519	0.716751	1329	1	-2.0266
GNB1L	4	0.0015162	0.0054132	0.099053	1031	4	-2.2295	0.99848	0.99846	1	18143	0	-2.2295
MED14	4	0.0015191	0.0054263	0.099197	1032	4	-1.602	0.99848	0.99845	1	18142	0	-1.602
NUDCD3	4	0.0015227	0.005442	0.099388	1033	3	-2.066	0.62315	0.69344	1	12223	1	-2.066
MSTO1	4	0.0015267	0.0054557	0.099541	1034	4	-3.597	0.99339	0.99342	1	17786	0	-3.597
VPS72	4	0.0015315	0.0054703	0.099712	1035	4	-2.4503	0.9832	0.9832	1	17388	0	-2.4503
TUBB2B	4	0.0015412	0.0055008	0.10017	1036	3	-1.5807	0.7251	0.75116	1	13107	1	-1.5807
TUBGCP2	4	0.0015443	0.0055091	0.100196	1037	4	-2.2562	0.99846	0.99843	1	18138	0	-2.2562
GINS4	4	0.001545	0.0055128	0.100196	1038	3	-1.5897	0.33302	0.48252	1	8845	1	-1.5897
MEX3A	4	0.0015518	0.0055364	0.100528	1039	4	-1.0894	0.99845	0.99842	1	18137	0	-1.0894
DNLZ	4	0.0015567	0.0055506	0.10063	1040	4	-2.2979	0.99776	0.99776	1	18058	0	-2.2979
PIKFYVE	4	0.0015575	0.0055527	0.10063	1041	3	-1.9262	0.44438	0.59202	1	10639	1	-1.9262
PREB	4	0.0015665	0.0055825	0.101054	1042	4	-1.7631	0.9908	0.99079	1	17658	0	-1.7631
RPS10-NUDT3	4	0.0015676	0.0055867	0.101054	1043	3	-3.3698	0.97934	0.97945	1	17284	0	-3.3698
ESF1	4	0.001573	0.0056114	0.101402	1044	4	-1.5819	0.99534	0.99533	1	17887	0	-1.5819
TRPV3	4	0.0015839	0.0056481	0.101968	1045	4	-0.92864	0.99842	0.9984	1	18135	0	-0.92864
GTF3C4	4	0.001586	0.005657	0.102031	1046	4	-1.4975	0.99841	0.99839	1	18134	0	-1.4975
TMEM258	4	0.0015877	0.0056649	0.102076	1047	4	-2.2345	0.99841	0.99839	1	18133	0	-2.2345
MEAF6	4	0.0016195	0.0057813	0.104074	1048	4	-1.478	0.99838	0.99836	1	18129	0	-1.478
MED7	4	0.001637	0.0058541	0.105285	1049	3	-1.9748	0.14719	0.29641	0.93801	5962	1	-1.9748
GFPT1	4	0.0016419	0.0058688	0.105367	1050	4	-2.5742	0.99836	0.99834	1	18126	0	-2.5742
ERCC3	4	0.0016425	0.0058699	0.105367	1051	3	-2.6872	0.88996	0.88991	1	15450	0	-2.6872
KREMEN2	4	0.0016486	0.0058887	0.105606	1052	4	-1.7433	0.99835	0.99833	1	18125	0	-1.7433
MIS18A	4	0.0016516	0.0058961	0.105637	1053	3	-3.5449	0.89529	0.89524	1	15528	0	-3.5449
HIST1H2AI	4	0.0016582	0.0059165	0.105903	1054	3	-2.6359	0.95447	0.9545	1	16679	0	-2.6359
PSMD11	4	0.0016607	0.0059249	0.105953	1055	4	-2.1481	0.9951	0.99511	1	17875	0	-2.1481
NADK	4	0.0016714	0.005959	0.106461	1056	4	-3.4768	0.99752	0.99751	1	18036	0	-3.4768
STIP1	4	0.001675	0.0059737	0.106588	1057	4	-1.0004	0.99832	0.99831	1	18124	0	-1.0004
POLE	4	0.0016761	0.0059773	0.106588	1058	4	-3.4601	0.98905	0.98905	1	17587	0	-3.4601
WDR43	4	0.0016775	0.0059836	0.106599	1059	3	-2.4896	0.96076	0.96078	1	16823	0	-2.4896
PRAMEF15	4	0.0016791	0.005991	0.106629	1060	3	-1.0678	0.95923	0.95927	1	16785	0	-1.0678
STXBP2	4	0.001686	0.0060104	0.106874	1061	4	-0.91988	0.99831	0.9983	1	18123	0	-0.91988
GDI2	4	0.0016898	0.0060235	0.107006	1062	4	-1.7056	0.98979	0.98976	1	17623	0	-1.7056
VPS18	4	0.0016975	0.0060508	0.107389	1063	4	-1.0221	0.9983	0.99829	1	18121	0	-1.0221
RNPS1	4	0.0017006	0.0060628	0.107502	1064	4	-1.0639	0.9983	0.99829	1	18120	0	-1.0639
INHBE	4	0.0017055	0.0060785	0.10768	1065	4	-1.1082	0.99829	0.99829	1	18119	0	-1.1082
CNPY2	4	0.0017095	0.0060927	0.10783	1066	4	-1.6335	0.99829	0.99828	1	18118	0	-1.6335
PRPF40A	4	0.0017169	0.0061163	0.10812	1067	4	-2.8966	0.99828	0.99827	1	18117	0	-2.8966
NUDT21	4	0.0017192	0.0061247	0.10812	1068	4	-2.0554	0.99817	0.99817	1	18106	0	-2.0554
MLXIPL	4	0.0017209	0.006131	0.10812	1069	3	-1.315	0.67056	0.71864	1	12592	1	-1.315
HIST1H2BI	4	0.0017211	0.006132	0.10812	1070	3	-0.99965	0.91777	0.91779	1	15967	0	-0.99965
POLR1A	4	0.0017272	0.0061598	0.108509	1071	4	-2.1546	0.99767	0.99767	1	18052	0	-2.1546
SEH1L	4	0.0017328	0.0061729	0.108639	1072	4	-1.3443	0.99827	0.99826	1	18115	0	-1.3443
MRPL34	4	0.0017402	0.0061986	0.108989	1073	4	-1.0396	0.99705	0.99707	1	17990	0	-1.0396
GOLGA6L6	4	0.0017427	0.0062086	0.109063	1074	4	-1.5955	0.99826	0.99825	1	18114	0	-1.5955
MRPL53	4	0.0017454	0.006217	0.109109	1075	4	-1.1813	0.99825	0.99825	1	18113	0	-1.1813
MST1	4	0.0017511	0.0062374	0.109366	1076	4	-1.0487	0.99825	0.99824	1	18112	0	-1.0487
TUBB4A	4	0.0017569	0.0062589	0.109576	1077	3	-1.7741	0.92062	0.92072	1	16013	0	-1.7741
CMPK1	4	0.0017583	0.0062641	0.109576	1078	4	-1.4854	0.99824	0.99823	1	18111	0	-1.4854
ESCO2	4	0.001759	0.0062668	0.109576	1079	4	-1.0073	0.99824	0.99823	1	18110	0	-1.0073
ECT2	4	0.0017616	0.0062736	0.109593	1080	4	-1.9442	0.98247	0.98247	1	17365	0	-1.9442
GFER	4	0.0017666	0.0062946	0.109858	1081	4	-2.6352	0.98646	0.98642	1	17503	0	-2.6352
NDUFB7	4	0.0017808	0.0063428	0.110532	1082	4	-1.3492	0.98807	0.98808	1	17545	0	-1.3492
NELFA	4	0.0017817	0.0063449	0.110532	1083	3	-1.646	0.67572	0.72156	1	12634	1	-1.646
RPAIN	4	0.0018085	0.0064214	0.111714	1084	3	-1.8832	0.93537	0.93541	1	16293	0	-1.8832
RNF4	4	0.0018094	0.0064246	0.111714	1085	4	-1.0639	0.99293	0.99296	1	17759	0	-1.0639
CPSF1	4	0.0018124	0.0064324	0.111748	1086	4	-0.98222	0.99819	0.99818	1	18109	0	-0.98222
KIAA1211	4	0.0018173	0.0064477	0.111909	1087	4	-0.87327	0.99818	0.99818	1	18108	0	-0.87327
TM6SF2	4	0.001826	0.0064854	0.112461	1088	4	-1.2298	0.99817	0.99817	1	18107	0	-1.2298
TXNL4B	4	0.0018356	0.0065216	0.112985	1089	3	-2.2095	0.33673	0.48624	1	8895	1	-2.2095
RPL14	4	0.0018471	0.006573	0.113771	1090	4	-2.0696	0.99815	0.99814	1	18104	0	-2.0696
MAU2	4	0.0018642	0.0066312	0.114673	1091	3	-1.8169	0.74519	0.76426	1	13326	1	-1.8169
SRSF10	4	0.0018669	0.0066427	0.114767	1092	4	-1.5302	0.99362	0.99365	1	17800	0	-1.5302
TTC1	4	0.0018699	0.0066532	0.114843	1093	4	-1.2659	0.99813	0.99813	1	18103	0	-1.2659
MRPL28	4	0.0018754	0.00667	0.115028	1094	4	-1.1119	0.99812	0.99812	1	18102	0	-1.1119
RRAGA	4	0.0018834	0.0066962	0.115375	1095	3	-1.5615	0.75556	0.77146	1	13423	1	-1.5615
H3F3A	3	0.0018855	0.0053403	0.098291	1096	2	-2.3461	0.89872	0.89888	1	15595	0	-2.3461
SRSF3	4	0.0018892	0.006725	0.115766	1097	3	-2.0358	0.9776	0.97776	1	17232	0	-2.0358
WDR73	4	0.0018917	0.0067355	0.115841	1098	4	-1.1072	0.99811	0.9981	1	18101	0	-1.1072
ABCE1	4	0.0019063	0.006789	0.116611	1099	3	-2.0058	0.89211	0.89204	1	15484	0	-2.0058
SMG1	4	0.0019068	0.0067926	0.116611	1100	4	-2.0447	0.99809	0.99809	1	18100	0	-2.0447
ZNRD1	4	0.0019093	0.0068031	0.116678	1101	4	-2.0476	0.99809	0.99809	1	18099	0	-2.0476
MRPL46	4	0.001911	0.0068089	0.116678	1102	3	-1.7316	0.48605	0.63187	1	11253	1	-1.7316
BRF1	4	0.0019128	0.0068168	0.116682	1103	3	-1.1179	0.94276	0.94282	1	16449	0	-1.1179
CFB	4	0.0019146	0.0068215	0.116682	1104	4	-0.92023	0.99809	0.99808	1	18098	0	-0.92023
RCE1	4	0.0019315	0.0068776	0.117527	1105	3	-1.0084	0.30438	0.45441	1	8407	1	-1.0084
MRPS23	4	0.001933	0.0068833	0.117527	1106	3	-1.377	0.44601	0.59367	1	10661	1	-1.377
EXOSC7	4	0.0019475	0.0069274	0.118172	1107	3	-1.8244	0.95104	0.95108	1	16619	0	-1.8244
MED27	4	0.0019616	0.006973	0.118798	1108	4	-1.2924	0.99804	0.99803	1	18095	0	-1.2924
RPL30	4	0.0019625	0.0069767	0.118798	1109	3	-3.2401	0.91793	0.91793	1	15970	0	-3.2401
ORAI2	4	0.0019755	0.007026	0.11953	1110	4	-1.0031	0.99802	0.99802	1	18094	0	-1.0031
SNRNP70	4	0.0019849	0.0070642	0.119919	1111	4	-1.6137	0.99802	0.99801	1	18092	0	-1.6137
DCLRE1B	4	0.0019857	0.0070674	0.119919	1112	4	-1.4274	0.98915	0.98915	1	17592	0	-1.4274
OBFC1	4	0.0019859	0.0070679	0.119919	1113	4	-0.77918	0.99801	0.99801	1	18091	0	-0.77918
DCTN4	4	0.0019909	0.0070857	0.120114	1114	4	-1.5872	0.99801	0.998	1	18090	0	-1.5872
CNOT3	4	0.0019976	0.0071093	0.120378	1115	4	-1.1865	0.998	0.998	1	18088	0	-1.1865
WARS	4	0.0019986	0.007114	0.120378	1116	4	-0.87388	0.998	0.998	1	18087	0	-0.87388
UBTF	4	0.0020047	0.0071345	0.120616	1117	3	-2.0876	0.92478	0.92489	1	16092	0	-2.0876
NDUFA9	4	0.0020094	0.0071555	0.120862	1118	4	-1.0603	0.99799	0.99799	1	18086	0	-1.0603
AKIRIN2	4	0.0020172	0.007188	0.121303	1119	4	-1.9515	0.99798	0.99798	1	18085	0	-1.9515
NME1-NME2	4	0.0020258	0.0072131	0.121446	1120	4	-0.81949	0.99797	0.99797	1	18084	0	-0.81949
PABPC1	4	0.0020259	0.0072131	0.121446	1121	4	-1.4634	0.99218	0.9922	1	17729	0	-1.4634
H3F3B	4	0.0020271	0.0072158	0.121446	1122	4	-1.0694	0.99797	0.99797	1	18083	0	-1.0694
DRG2	4	0.0020317	0.0072383	0.121717	1123	4	-1.5678	0.99742	0.99741	1	18026	0	-1.5678
SASS6	4	0.0020347	0.0072514	0.121829	1124	2	-0.94564	0.35603	0.50509	1	9232	2	-0.94564
COPA	4	0.0020424	0.0072808	0.122184	1125	4	-1.2248	0.99692	0.99695	1	17979	0	-1.2248
MRPL12	4	0.0020439	0.0072855	0.122184	1126	4	-1.0921	0.99796	0.99795	1	18082	0	-1.0921
TUBGCP5	4	0.0020469	0.0072975	0.122222	1127	4	-1.2858	0.99795	0.99795	1	18081	0	-1.2858
NUTF2	4	0.0020482	0.0073007	0.122222	1128	3	-2.8914	0.96227	0.96227	1	16856	0	-2.8914
CWC15	4	0.0020541	0.007319	0.122421	1129	3	-1.1883	0.18819	0.34053	0.966181	6654	1	-1.1883
MTG1	4	0.0020561	0.0073295	0.122488	1130	4	-0.94343	0.99794	0.99794	1	18080	0	-0.94343
IPO4	4	0.0020674	0.007372	0.123088	1131	4	-1.1244	0.99793	0.99793	1	18079	0	-1.1244
NDUFAB1	4	0.0020771	0.0074029	0.123387	1132	4	-2.3164	0.99616	0.99617	1	17927	0	-2.3164
UTP3	4	0.0020771	0.0074029	0.123387	1133	3	-2.3035	0.93254	0.93261	1	16243	0	-2.3035
RBM33	4	0.0020903	0.0074527	0.123998	1134	4	-0.87753	0.99791	0.99791	1	18077	0	-0.87753
METTL14	4	0.0020904	0.0074527	0.123998	1135	4	-1.2751	0.99115	0.99115	1	17677	0	-1.2751
URM1	4	0.0020929	0.0074627	0.124054	1136	4	-2.6051	0.98578	0.98575	1	17481	0	-2.6051
EMC7	4	0.0021005	0.0074936	0.124459	1137	4	-2.8728	0.9979	0.99789	1	18076	0	-2.8728
ACLY	4	0.0021046	0.0075109	0.124623	1138	4	-2.015	0.9979	0.99789	1	18075	0	-2.015
PPIAL4C	4	0.0021066	0.0075167	0.124623	1139	2	-0.84456	0.042161	0.10844	0.81097	2525	2	-0.84456
EXOC7	4	0.0021114	0.0075324	0.124774	1140	4	-1.1346	0.99789	0.99788	1	18074	0	-1.1346
RBM39	4	0.0021151	0.0075455	0.124882	1141	4	-1.2244	0.99788	0.99788	1	18073	0	-1.2244
KRT17	4	0.0021266	0.0075912	0.125305	1142	4	-1.6759	0.99787	0.99787	1	18072	0	-1.6759
SPDYE1	4	0.002127	0.0075933	0.125305	1143	3	-0.90226	0.96664	0.96666	1	16959	0	-0.90226
SNRNP40	4	0.0021272	0.0075938	0.125305	1144	4	-1.4797	0.99485	0.99485	1	17861	0	-1.4797
C3	4	0.0021292	0.0076032	0.125305	1145	3	-1.005	0.93081	0.93092	1	16209	0	-1.005
POLD1	4	0.0021295	0.0076043	0.125305	1146	4	-2.5871	0.99787	0.99787	1	18071	0	-2.5871
MTO1	4	0.0021442	0.0076598	0.12611	1147	4	-0.9926	0.99786	0.99785	1	18069	0	-0.9926
C1orf131	4	0.0021519	0.007684	0.126397	1148	4	-0.70796	0.99785	0.99784	1	18068	0	-0.70796
LSM6	4	0.0021667	0.0077432	0.127261	1149	4	-1.14	0.99783	0.99783	1	18067	0	-1.14
HNRNPU	4	0.0021699	0.0077505	0.127271	1150	4	-3.7667	0.98901	0.989	1	17584	0	-3.7667
OSBP	4	0.0022019	0.0078617	0.128984	1151	3	-2.8486	0.91984	0.91994	1	15997	0	-2.8486
SURF6	4	0.0022086	0.0078827	0.129216	1152	3	-1.8444	0.88123	0.88119	1	15302	0	-1.8444
TAF1B	4	0.0022145	0.0079105	0.129559	1153	4	-1.6711	0.99779	0.99778	1	18064	0	-1.6711
SCGB1C1	4	0.0022162	0.0079189	0.129584	1154	3	-1.1867	0.57869	0.67167	1	11874	1	-1.1867
PPA1	4	0.0022194	0.0079346	0.129614	1155	4	-1.0914	0.99778	0.99778	1	18063	0	-1.0914
SMIM7	4	0.0022215	0.0079403	0.129614	1156	4	-0.85482	0.99778	0.99778	1	18062	0	-0.85482
CD2BP2	4	0.0022234	0.0079445	0.129614	1157	4	-1.0946	0.9932	0.99323	1	17773	0	-1.0946
PSMB2	4	0.0022264	0.007955	0.129614	1158	4	-1.9235	0.99777	0.99778	1	18061	0	-1.9235
KRTAP4-8	4	0.0022265	0.007955	0.129614	1159	3	-1.1779	0.74542	0.76441	1	13330	1	-1.1779
POLR2D	4	0.0022316	0.0079812	0.129929	1160	4	-1.1177	0.99777	0.99777	1	18060	0	-1.1177
TRAPPC1	4	0.0022362	0.0079954	0.130048	1161	4	-1.7719	0.99776	0.99776	1	18059	0	-1.7719
CDC16	4	0.0022399	0.0080085	0.130149	1162	4	-1.849	0.99683	0.99687	1	17975	0	-1.849
SNRPB	4	0.0022492	0.0080415	0.130573	1163	3	-1.3838	0.92596	0.92609	1	16120	0	-1.3838
DCTN6	4	0.0022518	0.0080536	0.130656	1164	4	-2.1241	0.99168	0.9917	1	17707	0	-2.1241
POLR2B	4	0.0022653	0.0080955	0.131224	1165	3	-1.9867	0.82314	0.82463	1	14307	1	-1.9867
TOPORS	4	0.00227	0.0081118	0.131313	1166	4	-0.98777	0.99589	0.99587	1	17918	0	-0.98777
COX7B	4	0.0022711	0.0081149	0.131313	1167	3	-1.4754	0.95895	0.95898	1	16780	0	-1.4754
SRP9	4	0.0022898	0.008181	0.132269	1168	4	-1.2242	0.99771	0.99771	1	18056	0	-1.2242
CHD8	4	0.0023012	0.008224	0.13285	1169	4	-1.5007	0.9977	0.9977	1	18055	0	-1.5007
UQCRH	4	0.0023032	0.0082319	0.132864	1170	1	0.20321	0.14785	0.29748	0.938913	5979	2	0.20321
GEMIN5	4	0.0023051	0.0082397	0.132877	1171	4	-1.5833	0.99769	0.9977	1	18054	0	-1.5833
NPIPB6	4	0.0023141	0.0082686	0.133157	1172	4	-1.5569	0.99724	0.99724	1	18012	0	-1.5569
ORC3	4	0.0023151	0.0082712	0.133157	1173	4	-1.5987	0.98673	0.98668	1	17516	0	-1.5987
CTDP1	4	0.0023267	0.0083184	0.133748	1174	4	-1.9004	0.99696	0.99698	1	17982	0	-1.9004
NDNL2	4	0.0023283	0.008322	0.133748	1175	3	-2.074	0.74248	0.76245	1	13290	1	-2.074
PPRC1	4	0.0023453	0.0083729	0.134451	1176	4	-1.9042	0.98578	0.98575	1	17483	0	-1.9042
DLG1	4	0.0023483	0.008386	0.134547	1177	4	-0.79598	0.99765	0.99764	1	18050	0	-0.79598
TTI1	4	0.0023629	0.0084306	0.135133	1178	4	-1.6277	0.99739	0.99738	1	18023	0	-1.6277
CINP	4	0.0023642	0.0084369	0.135133	1179	4	-1.8039	0.99764	0.99763	1	18048	0	-1.8039
OPA1	4	0.0023666	0.0084474	0.135186	1180	3	-1.9017	0.91199	0.91197	1	15856	0	-1.9017
HARS2	4	0.0023769	0.0084788	0.135527	1181	4	-1.5537	0.99538	0.99538	1	17891	0	-1.5537
MED29	4	0.0023779	0.008483	0.135527	1182	3	-1.6395	0.83806	0.83824	1	14536	1	-1.6395
DDX39A	4	0.0023836	0.0085029	0.135731	1183	4	-1.1529	0.99762	0.9976	1	18047	0	-1.1529
KAT5	4	0.0023944	0.0085386	0.136185	1184	3	-2.7401	0.65505	0.71014	1	12466	1	-2.7401
ANKLE2	4	0.0024094	0.008579	0.136713	1185	4	-2.1491	0.99759	0.99757	1	18046	0	-2.1491
SRRD	4	0.0024111	0.0085863	0.136715	1186	4	-1.0277	0.99759	0.99757	1	18045	0	-1.0277
YARS	4	0.0024192	0.0086204	0.137135	1187	4	-2.1293	0.99758	0.99757	1	18044	0	-2.1293
SH2D3A	4	0.0024215	0.0086272	0.137135	1188	4	-0.61902	0.99758	0.99756	1	18043	0	-0.61902
PRX	4	0.002432	0.008666	0.137635	1189	4	-1.4106	0.99112	0.99112	1	17676	0	-1.4106
RFK	4	0.0024401	0.0086938	0.137961	1190	4	-1.5677	0.99756	0.99755	1	18041	0	-1.5677
POLG2	4	0.0024512	0.0087347	0.13846	1191	4	-1.1543	0.99755	0.99753	1	18040	0	-1.1543
MRPS26	4	0.0024526	0.0087399	0.13846	1192	4	-0.92007	0.99755	0.99753	1	18039	0	-0.92007
KDSR	4	0.002457	0.0087609	0.138676	1193	4	-1.3858	0.99754	0.99753	1	18038	0	-1.3858
MCM4	4	0.0024664	0.0087892	0.139008	1194	4	-2.2582	0.99753	0.99752	1	18037	0	-2.2582
TUBB4B	4	0.0024911	0.0088736	0.140225	1195	4	-1.3459	0.99751	0.99749	1	18035	0	-1.3459
TSEN34	4	0.0024952	0.0088867	0.140315	1196	3	-2.3306	0.91587	0.91592	1	15932	0	-2.3306
TFAM	4	0.0025035	0.0089098	0.140562	1197	3	-1.9187	0.43293	0.58086	1	10470	1	-1.9187
DDB1	4	0.0025195	0.0089575	0.141197	1198	4	-2.7125	0.99385	0.99388	1	17811	0	-2.7125
BRD4	4	0.002522	0.0089654	0.141203	1199	4	-1.0552	0.99748	0.99747	1	18033	0	-1.0552
FOXK1	4	0.0025286	0.0089842	0.141382	1200	4	-0.87779	0.99747	0.99746	1	18032	0	-0.87779
COX11	4	0.0025325	0.0089994	0.141503	1201	4	-1.5006	0.99107	0.99107	1	17672	0	-1.5006
TAF2	4	0.0025495	0.0090555	0.142267	1202	4	-1.6036	0.99745	0.99744	1	18031	0	-1.6036
TMEM82	4	0.0025555	0.0090749	0.142453	1203	4	-1.0717	0.99744	0.99743	1	18030	0	-1.0717
ZSWIM4	4	0.0025779	0.0091421	0.143256	1204	4	-0.50227	0.99742	0.99741	1	18027	0	-0.50227
HS6ST1	4	0.0025787	0.0091431	0.143256	1205	3	-1.3323	0.2103	0.36228	0.979749	6981	1	-1.3323
GEMIN6	4	0.0025809	0.0091489	0.143256	1206	4	-2.1494	0.99346	0.99349	1	17791	0	-2.1494
CRTC1	4	0.0025834	0.0091594	0.143302	1207	4	-0.72645	0.99742	0.99741	1	18025	0	-0.72645
MRPL30	4	0.0025858	0.0091688	0.143331	1208	4	-1.2056	0.99741	0.99741	1	18024	0	-1.2056
SUPT7L	4	0.0025968	0.0092144	0.143925	1209	3	-1.3748	0.57189	0.66846	1	11811	1	-1.3748
KDM2A	4	0.0026145	0.0092794	0.14482	1210	4	-1.3132	0.99739	0.99738	1	18022	0	-1.3132
ATP1A1	4	0.0026194	0.0092988	0.144933	1211	4	-1.9543	0.99738	0.99738	1	18020	0	-1.9543
THOC6	4	0.0026208	0.009302	0.144933	1212	3	-1.2008	0.94337	0.94346	1	16463	0	-1.2008
SH3GL1	4	0.0026264	0.0093203	0.145099	1213	4	-0.82167	0.99737	0.99737	1	18019	0	-0.82167
PRIM2	4	0.0026478	0.0093859	0.145956	1214	4	-1.6505	0.99534	0.99533	1	17888	0	-1.6505
CCDC115	4	0.0026495	0.0093908	0.145956	1215	4	-1.7581	0.99454	0.99456	1	17849	0	-1.7581
ARFRP1	4	0.0026697	0.0094477	0.146719	1216	4	-2.2508	0.98141	0.98142	1	17336	0	-2.2508
LSM12	4	0.002677	0.0094734	0.146998	1217	4	-1.4002	0.99729	0.99727	1	18016	0	-1.4002
RCC1	4	0.0026869	0.0095059	0.147381	1218	4	-1.1303	0.99731	0.99731	1	18018	0	-1.1303
AGAP4	4	0.0026923	0.0095253	0.14756	1219	3	-2.8257	0.91313	0.9131	1	15872	0	-2.8257
EIF3G	4	0.002707	0.0095751	0.148211	1220	4	-1.6091	0.99729	0.99728	1	18017	0	-1.6091
NDUFA2	4	0.0027229	0.0096349	0.149014	1221	4	-1.6643	0.99269	0.99271	1	17750	0	-1.6643
PDCD7	4	0.0027367	0.0096821	0.149621	1222	4	-1.9404	0.99726	0.99725	1	18015	0	-1.9404
RPL38	4	0.0027433	0.0097046	0.149847	1223	4	-1.2975	0.99726	0.99725	1	18014	0	-1.2975
DDX51	4	0.0027711	0.0098069	0.151302	1224	4	-1.575	0.99154	0.99156	1	17701	0	-1.575
NUP160	4	0.0027806	0.009842	0.15172	1225	4	-1.4505	0.99219	0.99221	1	17730	0	-1.4505
ERAL1	4	0.0027839	0.0098546	0.15179	1226	4	-1.1405	0.99722	0.99722	1	18010	0	-1.1405
ATP5J2	4	0.0027951	0.0098902	0.152212	1227	4	-1.0328	0.9972	0.99721	1	18009	0	-1.0328
IDH3A	4	0.0027971	0.0098981	0.152212	1228	4	-1.0196	0.9972	0.99721	1	18008	0	-1.0196
USPL1	4	0.0028207	0.0099794	0.153244	1229	4	-1.6075	0.99718	0.99719	1	18005	0	-1.6075
HAUS8	4	0.0028216	0.0099815	0.153244	1230	4	-1.8038	0.99718	0.99719	1	18004	0	-1.8038
GCC1	4	0.0028239	0.0099909	0.153264	1231	4	-1.0084	0.99718	0.99718	1	18003	0	-1.0084
CCNH	4	0.002835	0.010028	0.153702	1232	3	-2.4295	0.74267	0.76259	1	13294	1	-2.4295
PISD	4	0.0028586	0.010113	0.154887	1233	4	-1.643	0.99593	0.99591	1	17919	0	-1.643
NOL7	4	0.0028736	0.010164	0.155513	1234	4	-2.1648	0.99713	0.99713	1	17999	0	-2.1648
CMTR1	4	0.0028769	0.010175	0.155513	1235	4	-1.8522	0.99712	0.99713	1	17998	0	-1.8522
OR4F21	4	0.0028798	0.010188	0.155513	1236	4	-1.6576	0.99712	0.99713	1	17997	0	-1.6576
OR11H2	4	0.0028828	0.010196	0.155513	1237	3	-1.4009	0.038255	0.10069	0.800653	2373	1	-1.4009
SRP72	4	0.0028841	0.010202	0.155513	1238	4	-1.1971	0.99712	0.99713	1	17996	0	-1.1971
KLF2	4	0.0028865	0.01021	0.155513	1239	4	-1.8697	0.99281	0.99284	1	17755	0	-1.8697
COQ6	4	0.0028867	0.010212	0.155513	1240	4	-0.97652	0.99711	0.99713	1	17995	0	-0.97652
KRTAP5-7	4	0.0028965	0.01024	0.155819	1241	3	-1.2606	0.96773	0.96776	1	16987	0	-1.2606
POU2F1	4	0.0029092	0.010285	0.156371	1242	4	-0.94794	0.99709	0.99711	1	17994	0	-0.94794
DDX47	4	0.0029134	0.010301	0.156414	1243	3	-2.2548	0.97889	0.979	1	17271	0	-2.2548
RPAP1	4	0.0029139	0.010304	0.156414	1244	4	-1.0265	0.99709	0.9971	1	17993	0	-1.0265
RFC1	4	0.0029256	0.010342	0.156869	1245	3	-1.5493	0.9575	0.95751	1	16746	0	-1.5493
AQP7	4	0.0029339	0.010375	0.157141	1246	3	-1.4489	0.038049	0.10029	0.799741	2367	1	-1.4489
CENPK	4	0.0029343	0.010377	0.157141	1247	3	-2.4511	0.95098	0.95102	1	16617	0	-2.4511
SMC5	4	0.0029447	0.01042	0.157666	1248	4	-1.6675	0.9945	0.99453	1	17847	0	-1.6675
RABL2B	4	0.0029526	0.010443	0.157881	1249	4	-0.9451	0.99705	0.99707	1	17989	0	-0.9451
COPB1	4	0.0029544	0.010451	0.157881	1250	4	-1.8739	0.99679	0.99682	1	17972	0	-1.8739
CTBP1	4	0.0029676	0.010493	0.15827	1251	4	-1.2283	0.99544	0.99543	1	17896	0	-1.2283
PRPF4B	4	0.0029678	0.010493	0.15827	1252	4	-0.8726	0.99703	0.99706	1	17988	0	-0.8726
MTHFD2	4	0.002985	0.010551	0.159012	1253	4	-1.4012	0.98937	0.98936	1	17602	0	-1.4012
KCNN3	4	0.0029907	0.010573	0.159225	1254	1	0.72628	0.0041534	0.014504	0.647508	423	3	0.72628
SNW1	4	0.0030156	0.010657	0.160353	1255	4	-1.0361	0.99698	0.99701	1	17986	0	-1.0361
ZNF335	4	0.0030213	0.010677	0.160532	1256	3	-1.3506	0.97863	0.97876	1	17259	0	-1.3506
METTL16	4	0.0030347	0.010713	0.160864	1257	4	-1.0588	0.99697	0.99699	1	17984	0	-1.0588
ATP5G2	4	0.0030368	0.01072	0.160864	1258	4	-0.70952	0.99696	0.99699	1	17983	0	-0.70952
ZNF207	4	0.0030406	0.010733	0.160864	1259	4	-1.5339	0.98627	0.98624	1	17495	0	-1.5339
HTATSF1	4	0.0030407	0.010733	0.160864	1260	4	-1.5105	0.99695	0.99698	1	17980	0	-1.5105
KRT18	4	0.0030436	0.010746	0.160924	1261	2	-2.6003	0.78306	0.79159	1	13743	1	-2.6003
GALE	4	0.0030495	0.010765	0.161087	1262	4	-0.84126	0.99695	0.99698	1	17981	0	-0.84126
ENY2	4	0.0030641	0.010807	0.161587	1263	3	-1.5215	0.34703	0.49633	1	9087	1	-1.5215
PSMA2	4	0.0030819	0.010871	0.162415	1264	3	-1.7441	0.97519	0.97533	1	17173	0	-1.7441
CHMP2A	4	0.0030906	0.010902	0.162721	1265	4	-3.0175	0.99691	0.99694	1	17978	0	-3.0175
STIL	4	0.0030921	0.010909	0.162721	1266	3	-1.3101	0.96832	0.96835	1	17008	0	-1.3101
MCMBP	4	0.0030954	0.010922	0.16278	1267	4	-1.8586	0.9969	0.99693	1	17977	0	-1.8586
CASP10	4	0.0030989	0.010933	0.162824	1268	4	-0.93694	0.9969	0.99693	1	17976	0	-0.93694
ARCN1	4	0.0031266	0.011032	0.164162	1269	3	-1.4774	0.92851	0.92864	1	16163	0	-1.4774
IFITM3	4	0.0031291	0.011041	0.164165	1270	3	-1.8712	0.92589	0.92601	1	16118	0	-1.8712
RAD21	4	0.0031613	0.011164	0.165867	1271	3	-1.0898	0.022983	0.069878	0.74635	1765	1	-1.0898
SMC2	4	0.0031721	0.011209	0.166406	1272	4	-2.3875	0.99106	0.99106	1	17671	0	-2.3875
NACA	4	0.003197	0.011293	0.167527	1273	4	-2.0327	0.98363	0.9836	1	17402	0	-2.0327
RRP1	4	0.0032089	0.011329	0.167924	1274	4	-1.1593	0.99679	0.99682	1	17973	0	-1.1593
COPS3	4	0.0032264	0.011388	0.168592	1275	4	-1.4404	0.99185	0.99188	1	17717	0	-1.4404
ZC3H4	4	0.0032268	0.011392	0.168592	1276	4	-0.93874	0.99677	0.9968	1	17971	0	-0.93874
KNTC1	4	0.0032499	0.011475	0.169685	1277	4	-0.82394	0.99675	0.99678	1	17969	0	-0.82394
ATP6V1G1	4	0.0032579	0.011504	0.169979	1278	4	-2.0775	0.99448	0.99451	1	17846	0	-2.0775
LIPT2	4	0.0032752	0.011565	0.170759	1279	4	-0.90552	0.99672	0.99675	1	17968	0	-0.90552
NDUFS8	4	0.0032863	0.011603	0.171183	1280	4	-1.4754	0.99516	0.99516	1	17879	0	-1.4754
PDCD2	4	0.0032949	0.011629	0.171428	1281	4	-1.6163	0.98893	0.98892	1	17580	0	-1.6163
RRS1	4	0.003301	0.011651	0.171618	1282	4	-2.1722	0.9967	0.99673	1	17965	0	-2.1722
DDIT3	4	0.0033215	0.011714	0.172281	1283	3	-1.2664	0.94743	0.94748	1	16542	0	-1.2664
BOLA3	4	0.0033218	0.011715	0.172281	1284	4	-2.6141	0.99668	0.99671	1	17964	0	-2.6141
DDX56	4	0.0033242	0.011723	0.172281	1285	3	-1.1815	0.84841	0.84829	1	14712	1	-1.1815
TEN1	4	0.0033309	0.011745	0.172422	1286	3	-2.0142	0.89358	0.8935	1	15505	0	-2.0142
METTL17	4	0.0033365	0.011765	0.172422	1287	4	-1.7225	0.99666	0.9967	1	17963	0	-1.7225
SEC16A	4	0.003338	0.011767	0.172422	1288	4	-1.458	0.99666	0.9967	1	17962	0	-1.458
SLC11A2	4	0.0033387	0.011769	0.172422	1289	4	-1.0812	0.99666	0.9967	1	17961	0	-1.0812
UBE2C	4	0.0033465	0.011798	0.172711	1290	4	-1.0667	0.99665	0.99669	1	17960	0	-1.0667
ZCCHC9	4	0.0033535	0.011821	0.172915	1291	4	-1.1894	0.99665	0.99668	1	17959	0	-1.1894
ABHD11	4	0.0033671	0.011864	0.173401	1292	3	-1.2755	0.33334	0.48283	1	8850	1	-1.2755
NPM1	4	0.0033711	0.011876	0.173443	1293	3	-2.0977	0.97534	0.97549	1	17179	0	-2.0977
SF3A1	4	0.003375	0.011889	0.173508	1294	4	-1.4247	0.99663	0.99666	1	17958	0	-1.4247
GPCPD1	4	0.0033861	0.011921	0.173841	1295	4	-1.0163	0.99661	0.99665	1	17957	0	-1.0163
TMEM11	4	0.0034025	0.01198	0.174555	1296	4	-1.0279	0.9966	0.99663	1	17956	0	-1.0279
COPS8	4	0.0034045	0.011989	0.174561	1297	2	-1.0832	0.4589	0.60651	1	10875	1	-1.0832
ADRM1	4	0.0034212	0.012049	0.1753	1298	4	-1.0862	0.99658	0.99662	1	17954	0	-1.0862
OXA1L	4	0.003428	0.012072	0.175493	1299	3	-1.008	0.96973	0.96974	1	17036	0	-1.008
GOSR2	4	0.0034325	0.012085	0.175522	1300	4	-0.94415	0.99657	0.9966	1	17953	0	-0.94415
TPX2	4	0.0034362	0.012099	0.175522	1301	3	-1.3753	0.95729	0.95728	1	16739	0	-1.3753
RBMS2	4	0.0034376	0.012102	0.175522	1302	3	-1.2897	0.62483	0.69431	1	12235	1	-1.2897
ARPC1B	4	0.0034456	0.012129	0.175775	1303	4	-1.017	0.99655	0.99659	1	17952	0	-1.017
CEP85	4	0.0034588	0.012172	0.17627	1304	4	-1.34	0.99654	0.99658	1	17951	0	-1.34
DICER1	4	0.0034725	0.012226	0.176917	1305	4	-0.96449	0.99653	0.99656	1	17950	0	-0.96449
UTP18	4	0.0034893	0.012282	0.177585	1306	3	-1.3981	0.38064	0.52928	1	9640	1	-1.3981
HNRNPK	4	0.0035526	0.012485	0.180388	1307	4	-1.5875	0.99172	0.99174	1	17708	0	-1.5875
PSMC4	4	0.003566	0.012527	0.180863	1308	4	-2.7008	0.99107	0.99107	1	17673	0	-2.7008
TAMM41	4	0.0035695	0.01254	0.180899	1309	3	-1.5531	0.82681	0.82787	1	14361	1	-1.5531
SNRNP27	4	0.0035863	0.012597	0.181585	1310	2	-1.4983	0.86897	0.86887	1	15066	0	-1.4983
COL23A1	4	0.0035922	0.012612	0.181665	1311	4	-0.72589	0.99641	0.99643	1	17943	0	-0.72589
NHEJ1	4	0.0036164	0.012701	0.182738	1312	4	-0.782	0.99638	0.9964	1	17942	0	-0.782
POTEG	4	0.0036179	0.012706	0.182738	1313	3	-1.4676	0.87953	0.87954	1	15269	0	-1.4676
MTCH2	4	0.0036235	0.012725	0.182837	1314	4	-1.3623	0.99634	0.99635	1	17941	0	-1.3623
VMA21	4	0.003625	0.012732	0.182837	1315	3	-1.6846	0.70918	0.74111	1	12930	1	-1.6846
CTU1	4	0.0036299	0.01275	0.182954	1316	3	-2.7052	0.85091	0.85079	1	14755	0	-2.7052
NDUFA13	4	0.003632	0.01276	0.182965	1317	3	-1.4877	0.77469	0.7852	1	13645	1	-1.4877
MDH2	4	0.0036651	0.012871	0.184412	1318	4	-0.42836	0.99633	0.99635	1	17940	0	-0.42836
ACTR3	4	0.0036903	0.012954	0.185465	1319	4	-1.164	0.98991	0.98988	1	17628	0	-1.164
COMMD7	4	0.0037074	0.013011	0.186009	1320	3	-1.6866	0.86043	0.86027	1	14908	0	-1.6866
RAB5C	4	0.0037079	0.013012	0.186009	1321	4	-1.0342	0.99629	0.99631	1	17938	0	-1.0342
CCDC116	4	0.0037263	0.013074	0.186759	1322	4	-0.88858	0.99627	0.99629	1	17936	0	-0.88858
WDR92	4	0.0037318	0.013091	0.18685	1323	4	-0.96529	0.99627	0.99628	1	17935	0	-0.96529
BPTF	4	0.0037503	0.013155	0.18757	1324	4	-1.2582	0.99625	0.99627	1	17934	0	-1.2582
RPRD1B	4	0.0037543	0.01317	0.18757	1325	4	-1.2508	0.99625	0.99626	1	17933	0	-1.2508
RNF103-CHMP3	4	0.0037549	0.013171	0.18757	1326	3	-1.1899	0.90884	0.90882	1	15797	0	-1.1899
COX6B1	4	0.0037841	0.013269	0.188831	1327	4	-1.3524	0.99622	0.99622	1	17931	0	-1.3524
AURKAIP1	4	0.0037955	0.013303	0.189076	1328	4	-1.2539	0.98216	0.98215	1	17354	0	-1.2539
NOC2L	4	0.003797	0.013307	0.189076	1329	4	-1.6235	0.99226	0.99228	1	17732	0	-1.6235
HIRA	4	0.0038255	0.013397	0.190222	1330	4	-0.72652	0.99617	0.99618	1	17929	0	-0.72652
AP1M2	4	0.0038353	0.013437	0.190637	1331	4	-0.60484	0.99616	0.99617	1	17928	0	-0.60484
NUBPL	4	0.003841	0.013455	0.190754	1332	4	-1.0831	0.99616	0.99617	1	17926	0	-1.0831
CLSPN	4	0.003854	0.013493	0.191146	1333	3	-1.5754	0.9721	0.97221	1	17099	0	-1.5754
GPS1	4	0.0038864	0.013597	0.192472	1334	3	-2.1794	0.96173	0.96174	1	16847	0	-2.1794
SRSF11	4	0.0038982	0.013632	0.192832	1335	3	-1.4861	0.95605	0.95609	1	16714	0	-1.4861
MRPL52	4	0.0039175	0.013691	0.193525	1336	3	-1.9407	0.49772	0.6366	1	11324	1	-1.9407
RPN1	4	0.0039283	0.013725	0.193854	1337	3	-2.1577	0.90587	0.90586	1	15738	0	-2.1577
FIP1L1	4	0.0039487	0.013794	0.194679	1338	3	-1.877	0.9353	0.93535	1	16292	0	-1.877
RMI1	4	0.0039558	0.013818	0.194874	1339	3	-1.2615	0.7002	0.73576	1	12850	1	-1.2615
PTCD3	4	0.0039712	0.013877	0.195556	1340	4	-1.0831	0.99164	0.99167	1	17704	0	-1.0831
SARS2	4	0.0040004	0.01399	0.196961	1341	4	-0.93536	0.996	0.99598	1	17924	0	-0.93536
NDOR1	4	0.0040026	0.013997	0.196961	1342	4	-0.82511	0.996	0.99598	1	17923	0	-0.82511
PCP2	4	0.0040093	0.014026	0.197044	1343	4	-0.77603	0.99599	0.99598	1	17921	0	-0.77603
PKN1	4	0.0040093	0.014026	0.197044	1344	4	-0.94515	0.99599	0.99598	1	17922	0	-0.94515
GMFG	4	0.0040117	0.014034	0.197044	1345	4	-1.1655	0.99318	0.99321	1	17770	0	-1.1655
PLA2G10	4	0.0040271	0.014087	0.197612	1346	3	-2.6437	0.45275	0.60033	1	10771	1	-2.6437
OS9	4	0.0040329	0.0141	0.197612	1347	4	-1.4344	0.98406	0.98404	1	17414	0	-1.4344
EIF2S1	4	0.004035	0.014106	0.197612	1348	4	-1.7096	0.99536	0.99535	1	17889	0	-1.7096
PDCL	4	0.004045	0.014142	0.197972	1349	4	-1.2945	0.99512	0.99513	1	17877	0	-1.2945
CD3EAP	4	0.004083	0.014268	0.199578	1350	4	-1.4166	0.99435	0.99437	1	17841	0	-1.4166
FOXD4L1	4	0.0040909	0.014302	0.199907	1351	3	-1.3068	0.62223	0.69295	1	12217	1	-1.3068
FAF2	4	0.0041029	0.014341	0.200301	1352	4	-1.4591	0.99132	0.99134	1	17688	0	-1.4591
MDN1	4	0.0041228	0.014408	0.20109	1353	4	-1.9163	0.98472	0.98471	1	17437	0	-1.9163
NPIPA5	4	0.0041304	0.014431	0.20127	1354	3	-1.2682	0.8997	0.89964	1	15612	0	-1.2682
SMG5	4	0.004169	0.014548	0.202751	1355	4	-2.0664	0.98394	0.98393	1	17410	0	-2.0664
GOLGA8J	4	0.0041787	0.01458	0.203032	1356	4	-0.83794	0.99582	0.9958	1	17915	0	-0.83794
TEX10	4	0.004183	0.014598	0.203032	1357	4	-1.8355	0.99582	0.9958	1	17914	0	-1.8355
TBL3	4	0.0041835	0.014601	0.203032	1358	4	-2.8058	0.98587	0.98584	1	17484	0	-2.8058
SHQ1	4	0.0041875	0.014615	0.203087	1359	3	-1.5912	0.96778	0.96781	1	16988	0	-1.5912
SPRR2B	4	0.0041909	0.014628	0.203112	1360	4	-0.75981	0.99581	0.99579	1	17913	0	-0.75981
HIST1H2BN	4	0.0042062	0.014684	0.203749	1361	3	-1.9765	0.85532	0.8552	1	14822	0	-1.9765
EIF1AX	4	0.00422	0.014726	0.204173	1362	2	-1.1073	0.79027	0.79715	1	13833	1	-1.1073
CFL1	4	0.0042567	0.014853	0.205789	1363	3	-1.0312	0.95899	0.95901	1	16782	0	-1.0312
RAD51	4	0.004266	0.014881	0.206023	1364	4	-1.0034	0.99573	0.99571	1	17911	0	-1.0034
MRPS25	4	0.0042976	0.014988	0.207344	1365	4	-1.2501	0.99202	0.99204	1	17723	0	-1.2501
NDUFA10	4	0.0043112	0.015026	0.207693	1366	3	-1.536	0.92751	0.92763	1	16144	0	-1.536
AP1G2	4	0.0043143	0.015037	0.207693	1367	4	-1.1129	0.99422	0.99426	1	17828	0	-1.1129
NDUFC1	4	0.0043189	0.015054	0.207693	1368	4	-1.0987	0.99568	0.99566	1	17910	0	-1.0987
SULT1A3	4	0.0043198	0.015057	0.207693	1369	4	-0.80126	0.99568	0.99566	1	17909	0	-0.80126
POLR2E	4	0.0043263	0.01508	0.207859	1370	3	-1.5493	0.9745	0.97462	1	17154	0	-1.5493
DENND1C	4	0.0043368	0.01512	0.208264	1371	4	-1.3457	0.99566	0.99564	1	17908	0	-1.3457
MINOS1	4	0.0043714	0.015227	0.209584	1372	3	-1.1325	0.68848	0.72885	1	12746	1	-1.1325
SAP30BP	4	0.0043917	0.015292	0.210322	1373	4	-1.6602	0.99561	0.99559	1	17907	0	-1.6602
HMGCR	4	0.0044098	0.015339	0.210814	1374	4	-0.99858	0.9911	0.99111	1	17674	0	-0.99858
KIF23	4	0.0044173	0.015362	0.210954	1375	3	-2.7015	0.95171	0.95176	1	16633	0	-2.7015
SRRM2	4	0.0044198	0.015371	0.210954	1376	4	-0.77905	0.99558	0.99556	1	17906	0	-0.77905
GINS1	4	0.0044334	0.015415	0.211287	1377	4	-1.0127	0.99557	0.99555	1	17905	0	-1.0127
UBA3	4	0.0044339	0.015418	0.211287	1378	4	-1.1957	0.987	0.98696	1	17521	0	-1.1957
DDTL	4	0.004448	0.015466	0.211641	1379	4	-0.54085	0.99555	0.99553	1	17902	0	-0.54085
COA5	4	0.004448	0.015466	0.211641	1380	4	-1.7581	0.99555	0.99553	1	17903	0	-1.7581
NDUFA11	4	0.0044605	0.015506	0.212025	1381	4	-1.7536	0.99181	0.99183	1	17713	0	-1.7536
RBM4	4	0.0044773	0.01557	0.212753	1382	4	-1.0466	0.99552	0.99551	1	17901	0	-1.0466
KIAA0196	4	0.0044839	0.015592	0.2129	1383	3	-1.7661	0.95041	0.95046	1	16600	0	-1.7661
PCBP2	4	0.0045018	0.015653	0.213493	1384	3	-1.0387	0.97088	0.97094	1	17066	0	-1.0387
BSCL2	4	0.004503	0.015658	0.213493	1385	4	-1.2161	0.9955	0.99548	1	17900	0	-1.2161
AK6	4	0.0045265	0.015745	0.214525	1386	4	-2.0394	0.99547	0.99546	1	17899	0	-2.0394
COMMD3	4	0.0045413	0.015797	0.21507	1387	4	-1.1428	0.99546	0.99545	1	17897	0	-1.1428
WDR33	4	0.0045554	0.015843	0.215543	1388	3	-1.2405	0.11538	0.24275	0.914638	5012	1	-1.2405
PPA2	4	0.004565	0.015872	0.215787	1389	4	-0.76189	0.99543	0.99543	1	17895	0	-0.76189
GTPBP8	4	0.0045706	0.015887	0.215831	1390	4	-1.1	0.99543	0.99542	1	17894	0	-1.1
CDC6	4	0.0045765	0.015908	0.215968	1391	3	-2.0753	0.62051	0.6921	1	12202	1	-2.0753
WDR82	4	0.0045884	0.015956	0.21646	1392	4	-1.3351	0.98506	0.98504	1	17447	0	-1.3351
DLST	4	0.0045966	0.015983	0.216674	1393	4	-1.9812	0.98926	0.98925	1	17596	0	-1.9812
WBSCR22	4	0.0046061	0.01601	0.216817	1394	4	-1.3291	0.99236	0.99238	1	17735	0	-1.3291
CSH2	4	0.004608	0.016017	0.216817	1395	4	-0.88425	0.99539	0.99539	1	17892	0	-0.88425
GTPBP3	4	0.0046114	0.016031	0.216854	1396	4	-0.90249	0.9818	0.98181	1	17347	0	-0.90249
KIF20A	4	0.0046319	0.016097	0.217507	1397	4	-1.072	0.99537	0.99536	1	17890	0	-1.072
GNPNAT1	4	0.0046329	0.016102	0.217507	1398	3	-1.4743	0.80931	0.81261	1	14096	1	-1.4743
ARHGEF35	4	0.0046511	0.016157	0.218087	1399	3	-1.3872	0.88765	0.88761	1	15411	0	-1.3872
DHX30	4	0.0046711	0.01622	0.218787	1400	4	-0.77352	0.99533	0.99533	1	17886	0	-0.77352
CHMP6	4	0.0047041	0.01634	0.220085	1401	3	-2.0993	0.9562	0.95624	1	16717	0	-2.0993
GSPT1	4	0.0047128	0.016372	0.220359	1402	4	-2.2606	0.99439	0.99441	1	17842	0	-2.2606
TTK	4	0.0047315	0.016444	0.221168	1403	4	-1.4291	0.99527	0.99527	1	17884	0	-1.4291
MEF2B	4	0.0047502	0.016509	0.221891	1404	4	-0.51946	0.99525	0.99525	1	17883	0	-0.51946
MRPS14	4	0.0047686	0.016575	0.222621	1405	3	-1.7008	0.1594	0.31228	0.947166	6223	1	-1.7008
GOLGA8N	4	0.004775	0.016608	0.222899	1406	4	-1.8243	0.9912	0.99122	1	17681	0	-1.8243
CTDNEP1	4	0.0048138	0.016733	0.224197	1407	4	-1.0569	0.99519	0.99519	1	17882	0	-1.0569
BOLA2	4	0.0048189	0.016747	0.224197	1408	3	-2.0965	0.94012	0.94017	1	16393	0	-2.0965
RPL10A	4	0.004824	0.016765	0.224197	1409	3	-1.7202	0.96734	0.96736	1	16977	0	-1.7202
WEE1	4	0.0048248	0.016767	0.224197	1410	3	-1.4113	0.95966	0.95968	1	16798	0	-1.4113
MED10	4	0.0048264	0.01677	0.224197	1411	4	-0.78731	0.99517	0.99517	1	17881	0	-0.78731
POLR2J3	4	0.0048283	0.016778	0.224197	1412	3	-1.6158	0.89154	0.89149	1	15475	0	-1.6158
LRPPRC	4	0.0048332	0.016787	0.224197	1413	4	-1.1905	0.99517	0.99517	1	17880	0	-1.1905
NCAPG2	4	0.0048581	0.016873	0.225179	1414	3	-1.633	0.76221	0.77612	1	13493	1	-1.633
SNAPC4	4	0.0048769	0.016942	0.225943	1415	2	-1.8209	0.67716	0.72237	1	12642	1	-1.8209
TRPM7	4	0.0048927	0.016991	0.226434	1416	4	-0.93222	0.99511	0.99512	1	17876	0	-0.93222
ZNF99	4	0.0048987	0.017014	0.226581	1417	4	-2.0749	0.98978	0.98974	1	17622	0	-2.0749
COPS5	4	0.0049111	0.017052	0.226931	1418	3	-1.6195	0.96463	0.96465	1	16912	0	-1.6195
LSM10	4	0.0049242	0.017099	0.227392	1419	4	-1.8296	0.99508	0.99509	1	17874	0	-1.8296
ATXN7L2	4	0.0049459	0.017162	0.228075	1420	4	-0.83095	0.99505	0.99506	1	17873	0	-0.83095
ILF3	4	0.0049611	0.017213	0.22859	1421	4	-1.5128	0.98936	0.98936	1	17601	0	-1.5128
TIMM23	4	0.0049854	0.017297	0.229542	1422	4	-2.6118	0.99284	0.99286	1	17757	0	-2.6118
CIB4	4	0.0049945	0.017322	0.229708	1423	4	-0.7149	0.99501	0.99501	1	17871	0	-0.7149
SF3B1	4	0.0050079	0.017365	0.230116	1424	3	-1.2133	0.30341	0.45346	1	8396	1	-1.2133
MED22	4	0.0050204	0.017403	0.230158	1425	4	-0.6839	0.99498	0.99499	1	17870	0	-0.6839
IKBKAP	4	0.0050217	0.017407	0.230158	1426	4	-1.9192	0.98898	0.98897	1	17583	0	-1.9192
PSMB5	4	0.0050239	0.017417	0.230158	1427	4	-0.88787	0.99498	0.99498	1	17869	0	-0.88787
EPRS	4	0.0050239	0.017417	0.230158	1428	4	-1.1423	0.99498	0.99498	1	17868	0	-1.1423
NUP62	4	0.0050393	0.01748	0.230828	1429	3	-1.5629	0.6983	0.73462	1	12839	1	-1.5629
FAM129C	4	0.005059	0.017535	0.231393	1430	4	-0.4755	0.99494	0.99495	1	17866	0	-0.4755
CTAGE6	4	0.005063	0.017549	0.231425	1431	4	-0.71181	0.99494	0.99494	1	17865	0	-0.71181
KRTAP2-2	4	0.0050917	0.017655	0.232659	1432	4	-0.76904	0.99491	0.99491	1	17864	0	-0.76904
KRR1	4	0.0051069	0.017704	0.233139	1433	4	-0.82622	0.99489	0.9949	1	17863	0	-0.82622
DHX36	4	0.0051333	0.017779	0.23397	1434	4	-1.3728	0.99487	0.99487	1	17862	0	-1.3728
DCAF13	4	0.0051466	0.01781	0.234207	1435	3	-1.1775	0.95448	0.95451	1	16680	0	-1.1775
MRPS18B	4	0.0051856	0.017946	0.235836	1436	3	-1.3436	0.97959	0.9797	1	17292	0	-1.3436
FDPS	4	0.0051901	0.017966	0.235927	1437	3	-1.848	0.95126	0.9513	1	16626	0	-1.848
CCNL1	4	0.0051999	0.018003	0.23617	1438	4	-1.4899	0.99253	0.99255	1	17743	0	-1.4899
PACS2	4	0.0052017	0.018009	0.23617	1439	4	-0.86523	0.9948	0.9948	1	17860	0	-0.86523
XRCC3	4	0.0052311	0.018106	0.237277	1440	4	-1.7904	0.98917	0.98916	1	17593	0	-1.7904
NDUFV2	4	0.0052419	0.018141	0.237572	1441	3	-1.2892	0.081607	0.18306	0.882881	3912	1	-1.2892
AARS2	4	0.00525	0.018175	0.237847	1442	3	-1.6197	0.90426	0.90425	1	15707	0	-1.6197
NCAPG	4	0.0052733	0.018242	0.23856	1443	4	-1.2118	0.98809	0.98811	1	17546	0	-1.2118
KTI12	4	0.0052947	0.018317	0.239381	1444	3	-2.0384	0.93099	0.9311	1	16213	0	-2.0384
PTCD1	4	0.0053229	0.018402	0.240325	1445	4	-1.2777	0.99468	0.9947	1	17858	0	-1.2777
RIOK1	4	0.0053311	0.018434	0.240569	1446	3	-2.1134	0.83452	0.83498	1	14468	1	-2.1134
SDHB	4	0.0053365	0.018447	0.240581	1447	3	-3.2845	0.1762	0.32884	0.957429	6485	1	-3.2845
FEN1	4	0.0053621	0.018528	0.241294	1448	4	-1.4383	0.99464	0.99466	1	17856	0	-1.4383
RAE1	4	0.0053621	0.018528	0.241294	1449	4	-2.3384	0.99464	0.99466	1	17855	0	-2.3384
DCTN1	4	0.0053812	0.018586	0.241885	1450	3	-0.97725	0.13228	0.2715	0.929617	5512	1	-0.97725
H2AFZ	4	0.0053889	0.01861	0.242039	1451	4	-0.97236	0.99461	0.99463	1	17854	0	-0.97236
PSMC1	4	0.0053994	0.018646	0.242336	1452	3	-2.6233	0.96578	0.96581	1	16943	0	-2.6233
BTF3L4	4	0.0054038	0.018663	0.242394	1453	3	-1.7436	0.71393	0.74403	1	12986	1	-1.7436
FES	4	0.0054153	0.018701	0.24271	1454	4	-0.97823	0.99458	0.99461	1	17853	0	-0.97823
TBL2	4	0.0054525	0.018842	0.24438	1455	4	-0.47114	0.99455	0.99457	1	17850	0	-0.47114
EXOSC8	4	0.005468	0.018892	0.244687	1456	3	-1.2982	0.86528	0.86521	1	14994	0	-1.2982
OBP2A	4	0.0054754	0.018911	0.244687	1457	3	-1.2823	0.96101	0.961	1	16828	0	-1.2823
SENP5	4	0.0054764	0.018913	0.244687	1458	4	-0.58518	0.99452	0.99454	1	17848	0	-0.58518
UQCRFS1	4	0.0054775	0.018918	0.244687	1459	3	-2.6822	0.32501	0.47464	1	8736	1	-2.6822
ABHD17A	4	0.0054855	0.018942	0.244838	1460	3	-1.4568	0.97662	0.97677	1	17203	0	-1.4568
AAGAB	4	0.0055327	0.019104	0.246756	1461	3	-1.276	0.97238	0.9725	1	17104	0	-1.276
RIC1	4	0.0055468	0.019148	0.247156	1462	2	-1.2674	0.93318	0.93325	1	16259	0	-1.2674
EIF4B	4	0.0055612	0.019183	0.247292	1463	4	-0.77999	0.99444	0.99446	1	17845	0	-0.77999
CDC5L	4	0.0055699	0.019214	0.247292	1464	4	-1.6918	0.99256	0.99258	1	17745	0	-1.6918
NUF2	4	0.0055717	0.019218	0.247292	1465	3	-1.531	0.97202	0.97213	1	17097	0	-1.531
TTI2	4	0.0055736	0.019224	0.247292	1466	3	-2.1634	0.83349	0.834	1	14450	1	-2.1634
UBN2	4	0.0055736	0.019224	0.247292	1467	4	-0.61404	0.99443	0.99445	1	17844	0	-0.61404
NHP2L1	4	0.0055979	0.019307	0.248181	1468	2	-1.6619	0.41976	0.56781	1	10251	1	-1.6619
USP5	4	0.0056025	0.019323	0.248181	1469	3	-1.0446	0.87047	0.87037	1	15094	0	-1.0446
FNTB	4	0.0056056	0.019332	0.248181	1470	4	-2.122	0.99439	0.99442	1	17843	0	-2.122
ZW10	4	0.0056222	0.019398	0.248853	1471	3	-1.2103	0.75157	0.76869	1	13387	1	-1.2103
CPSF4	4	0.0056317	0.019428	0.249067	1472	4	-0.5919	0.99174	0.99177	1	17709	0	-0.5919
ICAM1	4	0.005654	0.019499	0.249805	1473	4	-0.62642	0.99435	0.99437	1	17840	0	-0.62642
MTG2	4	0.0056617	0.019526	0.249992	1474	4	-1.4485	0.99434	0.99436	1	17839	0	-1.4485
NPHS1	4	0.0056683	0.019547	0.250091	1475	4	-1.3377	0.99433	0.99436	1	17838	0	-1.3377
RABGGTB	4	0.005673	0.019561	0.250096	1476	4	-1.7127	0.98165	0.98167	1	17340	0	-1.7127
DEXI	4	0.0056862	0.019606	0.250454	1477	3	-0.83425	0.94064	0.94067	1	16407	0	-0.83425
GTF3C3	4	0.0056881	0.019616	0.250454	1478	4	-1.2931	0.9906	0.99059	1	17650	0	-1.2931
CORO7-PAM16	4	0.0056957	0.019637	0.250516	1479	4	-0.67478	0.9943	0.99434	1	17836	0	-0.67478
MLN	4	0.005699	0.019647	0.250516	1480	4	-1.1447	0.9943	0.99434	1	17835	0	-1.1447
CDK2	4	0.0057166	0.019708	0.250917	1481	4	-1.0551	0.99428	0.99432	1	17834	0	-1.0551
SLC35B1	4	0.0057174	0.019712	0.250917	1482	4	-1.258	0.98885	0.98884	1	17575	0	-1.258
SAFB	4	0.0057195	0.019718	0.250917	1483	3	-1.5054	0.97449	0.97461	1	17153	0	-1.5054
TRIM49	4	0.0057336	0.019766	0.251348	1484	3	-2.0069	0.059689	0.14217	0.846095	3171	1	-2.0069
RHPN1	4	0.005742	0.019791	0.251499	1485	4	-0.66699	0.99426	0.99429	1	17832	0	-0.66699
MED30	4	0.005758	0.019837	0.251757	1486	4	-1.1537	0.99424	0.99428	1	17831	0	-1.1537
TMEM189	4	0.0057597	0.019841	0.251757	1487	4	-0.96843	0.99424	0.99428	1	17830	0	-0.96843
WBP4	4	0.005763	0.019851	0.251757	1488	4	-1.3246	0.99424	0.99427	1	17829	0	-1.3246
PRDX1	4	0.0057855	0.01992	0.252465	1489	3	-2.2177	0.96368	0.96371	1	16891	0	-2.2177
LTB4R	4	0.0058208	0.020037	0.25377	1490	4	-0.50644	0.99418	0.99422	1	17827	0	-0.50644
FAM86B1	4	0.0058385	0.020094	0.25433	1491	3	-1.6401	0.13897	0.28285	0.934766	5713	1	-1.6401
ST20	4	0.0058428	0.020109	0.254352	1492	1	0.398	0.11198	0.23694	0.90831	4925	3	0.398
NDUFS3	4	0.0058614	0.020171	0.254954	1493	3	-1.0457	0.78796	0.79536	1	13803	1	-1.0457
HAUS3	4	0.0058752	0.020219	0.255396	1494	4	-2.9238	0.99412	0.99417	1	17826	0	-2.9238
SLU7	4	0.0059062	0.020334	0.256675	1495	4	-1.6253	0.99409	0.99414	1	17825	0	-1.6253
MRPL18	4	0.0059215	0.020382	0.257019	1496	4	-1.8623	0.98776	0.98775	1	17534	0	-1.8623
HAUS1	4	0.0059234	0.020388	0.257019	1497	2	-1.5183	0.93694	0.93699	1	16337	0	-1.5183
TFRC	4	0.0059356	0.020441	0.257508	1498	4	-1.1017	0.99406	0.99411	1	17822	0	-1.1017
HAUS4	4	0.0059545	0.020502	0.258102	1499	4	-1.4469	0.99175	0.99177	1	17710	0	-1.4469
CDK9	3	0.0059605	0.016321	0.219988	1500	3	-2.917	0.96535	0.96554	1	16932	0	-2.917
C17orf89	4	0.0059697	0.020545	0.258478	1501	4	-1.3146	0.99403	0.99408	1	17821	0	-1.3146
NUP205	4	0.0060013	0.020669	0.259861	1502	4	-2.6947	0.98271	0.98273	1	17376	0	-2.6947
EDC4	4	0.0060107	0.020701	0.26009	1503	4	-0.76358	0.99399	0.99404	1	17819	0	-0.76358
XPO6	4	0.0060149	0.020716	0.260102	1504	3	-1.2924	0.92832	0.92845	1	16159	0	-1.2924
EID2	4	0.0060228	0.020745	0.260304	1505	4	-1.5531	0.99398	0.99402	1	17818	0	-1.5531
POLR3D	4	0.0060365	0.020793	0.260714	1506	3	-1.2637	0.58445	0.67444	1	11922	1	-1.2637
TAF10	4	0.0060404	0.020806	0.260714	1507	3	-2.0577	0.95933	0.95935	1	16789	0	-2.0577
GNB1	4	0.0060532	0.020848	0.261066	1508	4	-0.84727	0.99395	0.99399	1	17817	0	-0.84727
CBFB	4	0.006067	0.020889	0.261405	1509	4	-0.91058	0.99393	0.99397	1	17816	0	-0.91058
SYCN	4	0.0060779	0.020925	0.261684	1510	4	-0.51995	0.99392	0.99396	1	17815	0	-0.51995
EXOSC10	4	0.0060837	0.020942	0.261721	1511	3	-1.5712	0.83659	0.83691	1	14508	1	-1.5712
PPIL4	4	0.0060916	0.020961	0.26179	1512	4	-1.1553	0.98466	0.98464	1	17436	0	-1.1553
PTAR1	4	0.0061153	0.021035	0.262406	1513	4	-1.2779	0.99029	0.99028	1	17641	0	-1.2779
CYB5B	4	0.0061167	0.021038	0.262406	1514	4	-0.70068	0.99388	0.99392	1	17814	0	-0.70068
SRP19	4	0.0061259	0.021068	0.262605	1515	4	-0.95004	0.99387	0.99391	1	17813	0	-0.95004
CRAT	4	0.0061422	0.021121	0.262944	1516	4	-0.86016	0.99386	0.99389	1	17812	0	-0.86016
FAM220A	4	0.006143	0.021123	0.262944	1517	3	-1.3408	0.96146	0.96144	1	16841	0	-1.3408
IFNA1	4	0.0061585	0.02118	0.263475	1518	4	-1.3728	0.99384	0.99388	1	17810	0	-1.3728
ICE1	4	0.0061709	0.02122	0.263741	1519	3	-1.3869	0.87789	0.87786	1	15231	0	-1.3869
RPP14	4	0.0061745	0.021229	0.263741	1520	3	-0.97245	0.74966	0.76731	1	13377	1	-0.97245
DDX42	4	0.0062087	0.021336	0.264902	1521	3	-1.4356	0.96848	0.96853	1	17014	0	-1.4356
ARSJ	4	0.0062346	0.021424	0.265814	1522	4	-0.65362	0.99377	0.99379	1	17807	0	-0.65362
CHD4	4	0.0062452	0.021461	0.266095	1523	4	-0.90784	0.99375	0.99378	1	17806	0	-0.90784
IPO7	4	0.0062508	0.021479	0.266148	1524	3	-1.0622	0.78218	0.7909	1	13735	1	-1.0622
MRPL51	4	0.0062806	0.021567	0.267064	1525	4	-1.0963	0.99372	0.99375	1	17804	0	-1.0963
C17orf47	4	0.0062995	0.021619	0.267538	1526	4	-0.73914	0.9937	0.99373	1	17803	0	-0.73914
THRAP3	4	0.0063482	0.021778	0.269203	1527	4	-1.0407	0.99365	0.99368	1	17802	0	-1.0407
UROS	4	0.0063496	0.021783	0.269203	1528	3	-1.0494	0.095793	0.20866	0.898583	4385	1	-1.0494
IMMT	4	0.0063612	0.021821	0.269506	1529	3	-1.2957	0.96182	0.96183	1	16852	0	-1.2957
PEX10	4	0.0063709	0.021858	0.269783	1530	4	-0.75096	0.99363	0.99365	1	17801	0	-0.75096
CA2	4	0.0063805	0.021893	0.270033	1531	4	-0.45566	0.99362	0.99365	1	17799	0	-0.45566
ATP6V1F	4	0.0063959	0.021934	0.270293	1532	2	-1.58	0.84786	0.84772	1	14702	1	-1.58
C17orf70	4	0.0064004	0.02195	0.270293	1533	3	-1.0845	0.86406	0.86396	1	14967	0	-1.0845
EIF1	4	0.0064032	0.021957	0.270293	1534	4	-0.66042	0.9936	0.99363	1	17798	0	-0.66042
MTIF2	4	0.006414	0.021993	0.270561	1535	4	-1.2172	0.99359	0.99361	1	17797	0	-1.2172
LCK	4	0.0064779	0.022193	0.272763	1536	4	-0.74206	0.99352	0.99355	1	17796	0	-0.74206
CCDC136	4	0.0064828	0.022209	0.272763	1537	4	-0.57902	0.99352	0.99355	1	17795	0	-0.57902
THOC2	4	0.0064852	0.022215	0.272763	1538	4	-0.73296	0.99351	0.99355	1	17794	0	-0.73296
DDX1	4	0.0064924	0.022242	0.272914	1539	4	-1.2154	0.99351	0.99354	1	17793	0	-1.2154
PLD3	4	0.0065009	0.022266	0.273033	1540	4	-0.6311	0.9935	0.99354	1	17792	0	-0.6311
ATF7	4	0.0065204	0.022336	0.273713	1541	4	-0.97359	0.98409	0.98406	1	17417	0	-0.97359
ACER1	4	0.0065563	0.022451	0.274945	1542	4	-1.0332	0.99344	0.99347	1	17790	0	-1.0332
PRKAR1A	4	0.0065802	0.022524	0.275665	1543	4	-1.2173	0.99342	0.99345	1	17789	0	-1.2173
SLX1B	4	0.0065875	0.022549	0.275693	1544	4	-0.92406	0.99341	0.99345	1	17788	0	-0.92406
POP4	4	0.0065893	0.022556	0.275693	1545	4	-0.89819	0.99341	0.99344	1	17787	0	-0.89819
SMG8	4	0.0066219	0.022663	0.276827	1546	4	-0.62269	0.99338	0.99341	1	17785	0	-0.62269
CAPN1	4	0.0066274	0.022682	0.276854	1547	4	-1.0853	0.99337	0.99341	1	17784	0	-1.0853
PRAMEF6	4	0.0066305	0.022695	0.276854	1548	4	-1.4434	0.99337	0.99341	1	17783	0	-1.4434
WDR62	4	0.0066428	0.022739	0.277097	1549	4	-0.75256	0.99336	0.99339	1	17782	0	-0.75256
TTC14	4	0.0066437	0.022744	0.277097	1550	3	-0.91236	0.96275	0.96275	1	16867	0	-0.91236
CRELD1	4	0.006665	0.022816	0.277581	1551	4	-0.65813	0.99333	0.99337	1	17781	0	-0.65813
MEF2BNB	4	0.0066675	0.022824	0.277581	1552	4	-0.87469	0.99333	0.99336	1	17780	0	-0.87469
TSG101	4	0.0066709	0.022833	0.277581	1553	3	-1.2664	0.96313	0.96316	1	16877	0	-1.2664
TSPAN10	4	0.0066762	0.022847	0.277581	1554	4	-0.66226	0.99332	0.99335	1	17779	0	-0.66226
GTF2F1	4	0.0066792	0.022857	0.277581	1555	3	-1.5646	0.77287	0.78388	1	13621	1	-1.5646
DIEXF	4	0.0066866	0.022886	0.277746	1556	4	-1.9566	0.98975	0.98972	1	17618	0	-1.9566
SOX12	4	0.006691	0.022902	0.277765	1557	4	-0.72438	0.99331	0.99334	1	17778	0	-0.72438
SLC52A2	4	0.006701	0.022933	0.277968	1558	4	-0.33856	0.9933	0.99333	1	17777	0	-0.33856
RAD23A	4	0.006717	0.022985	0.278412	1559	3	-1.0011	0.67348	0.72027	1	12620	1	-1.0011
PRKCA	4	0.006767	0.023164	0.280398	1560	4	-0.86441	0.99323	0.99326	1	17774	0	-0.86441
FOXN1	4	0.0068008	0.023266	0.281461	1561	4	-0.54876	0.9932	0.99323	1	17772	0	-0.54876
GABPB1	4	0.0068087	0.023293	0.281583	1562	2	-1.0881	0.94476	0.94478	1	16487	0	-1.0881
RECQL4	4	0.0068134	0.023306	0.281583	1563	4	-0.79927	0.99319	0.99321	1	17771	0	-0.79927
EWSR1	4	0.0068335	0.023358	0.282029	1564	4	-0.83827	0.99317	0.9932	1	17769	0	-0.83827
NOA1	4	0.0068739	0.023487	0.283263	1565	4	-1.0535	0.99313	0.99315	1	17768	0	-1.0535
GTF3C5	4	0.0068753	0.02349	0.283263	1566	2	-1.0206	0.77922	0.78857	1	13699	1	-1.0206
ATL2	4	0.0068929	0.023544	0.283726	1567	4	-1.2456	0.99311	0.99313	1	17767	0	-1.2456
LSM3	4	0.0069202	0.023622	0.284492	1568	4	-0.80764	0.99308	0.9931	1	17766	0	-0.80764
C11orf57	4	0.0069335	0.023668	0.28486	1569	3	-1.6156	0.081757	0.18332	0.882881	3921	1	-1.6156
TSPY10	4	0.0069507	0.023718	0.285278	1570	3	-0.91875	0.90124	0.90122	1	15642	0	-0.91875
ATP5E	4	0.0069865	0.023848	0.286622	1571	4	-1.0997	0.99301	0.99304	1	17764	0	-1.0997
STOML2	4	0.0069904	0.023861	0.286622	1572	4	-0.55109	0.99301	0.99303	1	17763	0	-0.55109
TTC27	4	0.0069936	0.023875	0.286622	1573	4	-1.0838	0.99301	0.99303	1	17762	0	-1.0838
C11orf86	4	0.0070058	0.023918	0.286949	1574	4	-0.63883	0.99299	0.99302	1	17761	0	-0.63883
CHAF1A	4	0.0070173	0.023953	0.287188	1575	4	-1.4851	0.99298	0.99301	1	17760	0	-1.4851
HIST1H4J	4	0.0070695	0.024119	0.289004	1576	3	-1.0602	0.55371	0.66028	1	11699	1	-1.0602
RARS	4	0.0070847	0.024174	0.28948	1577	2	-1.3004	0.021368	0.066565	0.743878	1684	2	-1.3004
TAF13	4	0.007101	0.024233	0.289933	1578	3	-0.94296	0.70253	0.73714	1	12867	1	-0.94296
RARS2	4	0.0071043	0.024247	0.289933	1579	3	-1.3051	0.30619	0.4562	1	8436	1	-1.3051
CEP55	4	0.0071082	0.024258	0.289933	1580	3	-1.2664	0.4586	0.60619	1	10868	1	-1.2664
DCTN2	4	0.0071808	0.024501	0.292649	1581	3	-1.0107	0.93553	0.93557	1	16297	0	-1.0107
HCST	4	0.0072042	0.024568	0.293268	1582	4	-0.7107	0.9928	0.99282	1	17754	0	-0.7107
PAXBP1	4	0.0072181	0.024606	0.293537	1583	3	-1.2228	0.92542	0.92554	1	16106	0	-1.2228
BAHCC1	4	0.0072435	0.024681	0.294239	1584	3	-1.2818	0.64171	0.70303	1	12362	1	-1.2818
CHKA	4	0.0072508	0.024707	0.294359	1585	4	-1.5967	0.99275	0.99278	1	17753	0	-1.5967
POLR2H	4	0.0072667	0.024753	0.294729	1586	3	-1.235	0.88406	0.88404	1	15345	0	-1.235
SNX32	4	0.0072772	0.024784	0.294912	1587	4	-0.9945	0.99272	0.99275	1	17752	0	-0.9945
MCAT	4	0.0072932	0.024842	0.295308	1588	4	-1.006	0.9827	0.98271	1	17375	0	-1.006
AHCYL1	4	0.0072971	0.024856	0.295308	1589	3	-1.6833	0.95093	0.95097	1	16615	0	-1.6833
NDUFB11	4	0.0072999	0.024864	0.295308	1590	3	-1.7577	0.97091	0.97098	1	17068	0	-1.7577
PPP1CB	4	0.0073182	0.024921	0.295794	1591	4	-1.962	0.98988	0.98984	1	17627	0	-1.962
EVA1C	4	0.0073235	0.024938	0.295808	1592	4	-0.93138	0.99268	0.9927	1	17749	0	-0.93138
DNAJA3	4	0.0073354	0.024976	0.296076	1593	3	-1.332	0.81221	0.81508	1	14137	1	-1.332
RPEL1	4	0.0073599	0.025043	0.296685	1594	3	-1.3959	0.88034	0.88032	1	15284	0	-1.3959
MED13	4	0.0073978	0.025164	0.297933	1595	3	-1.2553	0.3176	0.46747	1	8603	1	-1.2553
UBE2M	4	0.0074137	0.025221	0.298297	1596	3	-3.719	0.94897	0.94899	1	16571	0	-3.719
LRRC15	4	0.0074195	0.025236	0.298297	1597	4	-0.64542	0.99258	0.99261	1	17747	0	-0.64542
DNMT1	4	0.0074217	0.025242	0.298297	1598	4	-1.825	0.98452	0.98451	1	17434	0	-1.825
GFM1	4	0.0074314	0.025268	0.298407	1599	4	-0.91086	0.99247	0.99249	1	17741	0	-0.91086
CDC7	4	0.0074457	0.025312	0.298741	1600	2	-2.4758	0.95286	0.95293	1	16651	0	-2.4758
ZNF830	4	0.0074732	0.02541	0.29969	1601	4	-1.1557	0.99253	0.99255	1	17744	0	-1.1557
ZNF138	4	0.0074773	0.025424	0.29969	1602	1	0.29504	0.028388	0.08086	0.766068	1993	2	0.29504
EIF5B	4	0.0074988	0.025494	0.300331	1603	4	-1.4106	0.98147	0.98148	1	17337	0	-1.4106
TGFBRAP1	4	0.0075232	0.025566	0.300996	1604	4	-1.1271	0.99248	0.99249	1	17742	0	-1.1271
NKAP	4	0.0075429	0.025625	0.301428	1605	3	-1.5195	0.64082	0.70256	1	12360	1	-1.5195
RBBP8	4	0.0075455	0.025635	0.301428	1606	4	-0.68585	0.99245	0.99247	1	17739	0	-0.68585
PAICS	4	0.007558	0.025671	0.301666	1607	3	-1.6708	0.98102	0.98104	1	17326	0	-1.6708
TMEM131	4	0.007572	0.025717	0.302014	1608	4	-0.95449	0.99243	0.99245	1	17738	0	-0.95449
POLR2J	4	0.0075837	0.025751	0.302226	1609	4	-1.7357	0.98624	0.98622	1	17493	0	-1.7357
NR0B2	4	0.0075993	0.025803	0.302654	1610	4	-1.1925	0.9924	0.99242	1	17736	0	-1.1925
KRTAP5-6	4	0.007628	0.025885	0.303424	1611	2	-0.85111	0.69554	0.73299	1	12809	1	-0.85111
MRPL38	4	0.0076496	0.025947	0.303816	1612	2	-1.3968	0.91156	0.91152	1	15850	0	-1.3968
SETDB1	4	0.0076512	0.025951	0.303816	1613	4	-0.77867	0.99235	0.99237	1	17734	0	-0.77867
LTV1	4	0.0076658	0.025992	0.303862	1614	2	-2.2457	0.47999	0.62754	1	11172	1	-2.2457
ACSL4	4	0.0076677	0.025994	0.303862	1615	4	-0.46107	0.99233	0.99235	1	17733	0	-0.46107
UBE2N	4	0.0076766	0.026019	0.303862	1616	3	-2.3613	0.97031	0.97035	1	17049	0	-2.3613
PRPF6	4	0.007682	0.026034	0.303862	1617	3	-2.0387	0.9411	0.94114	1	16415	0	-2.0387
MRPS17	4	0.0076829	0.026035	0.303862	1618	3	-0.91127	0.90588	0.90587	1	15739	0	-0.91127
PPP1R12A	4	0.0076982	0.026084	0.304249	1619	2	-1.745	0.080911	0.18175	0.882735	3888	1	-1.745
OSGEP	4	0.0077199	0.026151	0.304837	1620	3	-1.0165	0.44168	0.58947	1	10598	1	-1.0165
ATAD3A	4	0.0077495	0.026249	0.305634	1621	3	-1.0513	0.97533	0.97548	1	17177	0	-1.0513
TMEM251	4	0.0077504	0.026252	0.305634	1622	4	-0.68551	0.99225	0.99227	1	17731	0	-0.68551
RTF1	4	0.0077634	0.026299	0.305994	1623	3	-1.3637	0.43411	0.582	1	10490	1	-1.3637
CCDC101	4	0.0078165	0.026471	0.307806	1624	3	-0.94516	0.90823	0.90822	1	15785	0	-0.94516
AQP12A	4	0.0078304	0.026512	0.308091	1625	3	-1.085	0.82007	0.82188	1	14262	1	-1.085
MMGT1	4	0.0078464	0.026564	0.308504	1626	4	-0.97863	0.99215	0.99217	1	17728	0	-0.97863
GSG2	4	0.0078491	0.02658	0.308504	1627	4	-0.5592	0.99215	0.99217	1	17727	0	-0.5592
MSH6	4	0.0078745	0.026658	0.309214	1628	3	-1.2592	0.90613	0.90613	1	15742	0	-1.2592
AASDHPPT	4	0.0079305	0.026835	0.311079	1629	3	-1.2286	0.9404	0.94044	1	16399	0	-1.2286
FAM133B	4	0.0079566	0.02691	0.311733	1630	4	-0.75573	0.99204	0.99206	1	17726	0	-0.75573
RHEB	4	0.0079633	0.026928	0.311733	1631	3	-0.89399	0.58013	0.67235	1	11887	1	-0.89399
CLNS1A	4	0.0079672	0.026941	0.311733	1632	4	-0.96394	0.99203	0.99205	1	17725	0	-0.96394
DRAP1	4	0.0079728	0.026963	0.311796	1633	4	-0.74536	0.99203	0.99204	1	17724	0	-0.74536
HIST1H1C	4	0.0079898	0.027015	0.312157	1634	4	-0.82202	0.99201	0.99202	1	17722	0	-0.82202
PCYT1A	4	0.0079949	0.02703	0.312157	1635	3	-1.7243	0.19905	0.35115	0.972286	6820	1	-1.7243
GPKOW	4	0.0079989	0.027043	0.312157	1636	2	-0.96916	0.63119	0.69754	1	12295	1	-0.96916
METAP2	4	0.0080054	0.02706	0.312159	1637	4	-0.80949	0.99199	0.99201	1	17721	0	-0.80949
NT5C	4	0.0080196	0.027105	0.312489	1638	3	-1.1544	0.92713	0.92727	1	16141	0	-1.1544
RLN3	4	0.0080326	0.027153	0.312848	1639	3	-1.1119	0.97332	0.97345	1	17127	0	-1.1119
INTS9	4	0.0080408	0.027178	0.312941	1640	4	-1.119	0.98337	0.98336	1	17394	0	-1.119
KAT8	4	0.0080652	0.027256	0.313649	1641	2	-1.4182	0.092151	0.2022	0.894451	4265	1	-1.4182
VOPP1	4	0.0080715	0.027275	0.313675	1642	3	-1.1023	0.94633	0.94636	1	16520	0	-1.1023
DAGLA	4	0.008078	0.027297	0.313737	1643	4	-0.54527	0.99192	0.99193	1	17720	0	-0.54527
PSMD8	4	0.0080999	0.027368	0.314371	1644	3	-1.4722	0.95996	0.95999	1	16803	0	-1.4722
USP8	4	0.0081094	0.027394	0.314469	1645	4	-0.64726	0.99189	0.99191	1	17719	0	-0.64726
OR4F4	4	0.008118	0.027428	0.314516	1646	4	-1.0056	0.99188	0.9919	1	17718	0	-1.0056
NUP37	4	0.0081206	0.027434	0.314516	1647	2	-0.98683	0.36667	0.51559	1	9400	1	-0.98683
RPL39	4	0.008126	0.027448	0.314516	1648	3	-2.1013	0.94801	0.94805	1	16553	0	-2.1013
DDX59	4	0.0081484	0.027517	0.315117	1649	3	-1.714	0.97551	0.97567	1	17184	0	-1.714
NFRKB	4	0.0081626	0.027558	0.315254	1650	4	-0.7152	0.99184	0.99186	1	17716	0	-0.7152
NUPL1	4	0.0081664	0.027572	0.315254	1651	3	-0.97258	0.97123	0.97131	1	17076	0	-0.97258
INTS12	4	0.0081707	0.027585	0.315254	1652	3	-1.1582	0.968	0.96804	1	16993	0	-1.1582
NOVA2	4	0.0081784	0.027608	0.315254	1653	4	-0.91348	0.99182	0.99184	1	17715	0	-0.91348
CBWD2	4	0.0081813	0.027612	0.315254	1654	4	-1.0022	0.99182	0.99184	1	17714	0	-1.0022
RPA2	4	0.008195	0.027659	0.315596	1655	3	-1.1648	0.92131	0.92141	1	16027	0	-1.1648
UBXN6	4	0.0082029	0.027686	0.315717	1656	4	-0.61559	0.9918	0.99182	1	17712	0	-0.61559
TOX4	4	0.0082201	0.027734	0.315897	1657	3	-1.2416	0.9287	0.92882	1	16168	0	-1.2416
MRPL36	4	0.0082209	0.027736	0.315897	1658	3	-1.1405	0.61588	0.68973	1	12164	1	-1.1405
ZNF358	4	0.0082275	0.027755	0.315933	1659	4	-0.81744	0.99177	0.9918	1	17711	0	-0.81744
SNUPN	4	0.0082525	0.027847	0.31665	1660	3	-1.1064	0.96325	0.96326	1	16878	0	-1.1064
NUP188	4	0.0082573	0.027864	0.31665	1661	3	-0.87265	0.96123	0.96119	1	16838	0	-0.87265
QTRT1	4	0.0082597	0.027869	0.31665	1662	3	-1.4579	0.85951	0.85935	1	14892	0	-1.4579
ATP6V1D	4	0.0082668	0.027893	0.316739	1663	3	-1.246	0.95437	0.95438	1	16676	0	-1.246
ABCC3	4	0.0083206	0.02806	0.318435	1664	4	-0.4889	0.99168	0.9917	1	17706	0	-0.4889
HIST1H2BJ	4	0.0083322	0.028095	0.318642	1665	4	-1.6594	0.99167	0.9917	1	17705	0	-1.6594
UBE2V1	4	0.0083705	0.028215	0.319818	1666	3	-1.255	0.56093	0.66351	1	11746	1	-1.255
CLCC1	4	0.0083872	0.028265	0.320184	1667	4	-0.73485	0.99161	0.99164	1	17703	0	-0.73485
SLC22A31	4	0.0084159	0.028354	0.320863	1668	4	-0.65411	0.99158	0.99162	1	17702	0	-0.65411
MFAP1	4	0.0084176	0.028358	0.320863	1669	4	-1.6679	0.98365	0.98362	1	17403	0	-1.6679
NUP98	4	0.0084232	0.028379	0.320908	1670	3	-1.0617	0.981	0.98103	1	17325	0	-1.0617
FOXM1	4	0.0084554	0.028488	0.321948	1671	3	-0.90854	0.88201	0.88199	1	15313	0	-0.90854
EMC2	4	0.0084682	0.028537	0.3223	1672	4	-0.91303	0.99153	0.99156	1	17700	0	-0.91303
PPWD1	4	0.0084808	0.028572	0.322504	1673	4	-0.88451	0.99152	0.99154	1	17699	0	-0.88451
NAB2	4	0.0084912	0.028613	0.322639	1674	4	-0.50051	0.99151	0.99154	1	17698	0	-0.50051
KIAA1143	4	0.0084934	0.028618	0.322639	1675	4	-0.48554	0.99151	0.99154	1	17697	0	-0.48554
BRIP1	4	0.0085164	0.028687	0.323221	1676	4	-0.98997	0.98599	0.98598	1	17487	0	-0.98997
DHFRL1	4	0.0085409	0.02877	0.323973	1677	3	-1.0323	0.78172	0.79055	1	13727	1	-1.0323
PPP1R35	4	0.008548	0.028794	0.324045	1678	2	-1.1452	0.92428	0.92441	1	16084	0	-1.1452
LENG8	4	0.0085626	0.02884	0.324366	1679	4	-1.0651	0.99144	0.99147	1	17694	0	-1.0651
FAM71F1	4	0.0085671	0.028857	0.324366	1680	4	-0.38245	0.99143	0.99147	1	17693	0	-0.38245
JUNB	4	0.0085802	0.028903	0.324664	1681	3	-1.3143	0.93715	0.93722	1	16342	0	-1.3143
MRPL14	4	0.0085851	0.028918	0.324664	1682	3	-1.2262	0.93733	0.93739	1	16346	0	-1.2262
C16orf59	4	0.008627	0.029065	0.326118	1683	4	-1.1603	0.98819	0.98819	1	17549	0	-1.1603
TP53TG3D	4	0.0086464	0.029134	0.326706	1684	4	-0.61137	0.99135	0.99137	1	17690	0	-0.61137
TBC1D28	4	0.0086541	0.029161	0.326806	1685	3	-1.1411	0.68697	0.728	1	12731	1	-1.1411
CAMSAP3	4	0.0086838	0.029264	0.327769	1686	3	-2.376	0.95113	0.95118	1	16622	0	-2.376
CSTB	4	0.0087173	0.029373	0.328801	1687	4	-1.2763	0.99128	0.9913	1	17687	0	-1.2763
PRR13	4	0.0087248	0.029396	0.328842	1688	4	-0.54206	0.99128	0.99129	1	17685	0	-0.54206
FABP3	4	0.0087384	0.029442	0.328842	1689	3	-1.2083	0.41583	0.56397	1	10190	1	-1.2083
SYMPK	4	0.0087414	0.029449	0.328842	1690	3	-1.1413	0.97664	0.9768	1	17204	0	-1.1413
BRD9	4	0.0087447	0.029458	0.328842	1691	3	-1.3424	0.92868	0.9288	1	16167	0	-1.3424
PSMG2	4	0.0087454	0.029464	0.328842	1692	2	-2.5416	0.16033	0.31317	0.947166	6239	1	-2.5416
KCTD2	4	0.0087589	0.029509	0.329015	1693	4	-0.74631	0.99124	0.99126	1	17684	0	-0.74631
POLR3F	4	0.0087612	0.029514	0.329015	1694	4	-0.85723	0.99124	0.99126	1	17683	0	-0.85723
TMED4	4	0.0087833	0.029598	0.329756	1695	3	-1.0017	0.20697	0.35903	0.977554	6934	1	-1.0017
CLN3	4	0.0087916	0.029625	0.329853	1696	4	-0.48921	0.99121	0.99123	1	17682	0	-0.48921
CTPS1	4	0.0088117	0.029692	0.330414	1697	3	-1.7007	0.87355	0.87349	1	15142	0	-1.7007
FRAT2	4	0.0088327	0.029753	0.330828	1698	4	-0.60493	0.99117	0.99118	1	17680	0	-0.60493
CABP7	4	0.0088388	0.029767	0.330828	1699	4	-0.65366	0.99116	0.99117	1	17679	0	-0.65366
ZNF781	4	0.0088467	0.029789	0.330828	1700	3	-0.62612	0.65087	0.70795	1	12429	1	-0.62612
ACSF2	4	0.0088495	0.0298	0.330828	1701	4	-0.61772	0.99115	0.99116	1	17678	0	-0.61772
POTEF	4	0.0088939	0.029938	0.332169	1702	4	-0.45252	0.99111	0.99111	1	17675	0	-0.45252
MRPL48	4	0.0088993	0.029956	0.332177	1703	3	-1.3528	0.97582	0.97597	1	17190	0	-1.3528
ARHGEF1	4	0.0089663	0.030175	0.3344	1704	4	-0.89118	0.99103	0.99104	1	17670	0	-0.89118
ACD	4	0.0089926	0.030257	0.335012	1705	4	-0.62588	0.99101	0.99101	1	17668	0	-0.62588
SERP2	4	0.0089941	0.030265	0.335012	1706	4	-0.90739	0.99101	0.991	1	17667	0	-0.90739
GOLGA8O	4	0.0090185	0.030343	0.335674	1707	4	-1.3962	0.98801	0.98803	1	17543	0	-1.3962
GNB2	4	0.0090274	0.030376	0.335842	1708	4	-0.83629	0.99097	0.99097	1	17665	0	-0.83629
CCDC86	4	0.0090912	0.030586	0.337963	1709	4	-1.1742	0.99091	0.9909	1	17663	0	-1.1742
NPDC1	4	0.0091155	0.030652	0.338501	1710	4	-0.83201	0.99088	0.99088	1	17662	0	-0.83201
CFAP20	4	0.0091268	0.030696	0.338783	1711	3	-1.4988	0.94637	0.9464	1	16521	0	-1.4988
HAUS6	4	0.0091562	0.030785	0.339574	1712	4	-0.82986	0.99084	0.99083	1	17660	0	-0.82986
BYSL	4	0.0091624	0.030818	0.33974	1713	4	-0.68001	0.99084	0.99083	1	17659	0	-0.68001
HIST1H2BL	4	0.0091729	0.03085	0.339889	1714	3	-1.4736	0.94124	0.94128	1	16421	0	-1.4736
PI4KB	4	0.0091806	0.030876	0.339925	1715	4	-0.8292	0.98972	0.98969	1	17616	0	-0.8292
SLC5A3	4	0.0091857	0.030889	0.339925	1716	4	-1.2521	0.98169	0.9817	1	17343	0	-1.2521
WNT10B	4	0.0092204	0.031012	0.341014	1717	3	-1.1834	0.69718	0.73394	1	12829	1	-1.1834
EIF4ENIF1	4	0.0092246	0.031027	0.341014	1718	4	-0.72218	0.99078	0.99076	1	17656	0	-0.72218
TMEM115	4	0.0092285	0.031042	0.341014	1719	4	-0.56673	0.99077	0.99076	1	17655	0	-0.56673
GIPC1	4	0.0092388	0.031076	0.341184	1720	4	-0.95961	0.99076	0.99075	1	17654	0	-0.95961
CCNK	4	0.0092526	0.031114	0.3414	1721	3	-1.5525	0.73042	0.75453	1	13158	1	-1.5525
USE1	4	0.0092744	0.031178	0.341903	1722	4	-0.5225	0.99073	0.99072	1	17653	0	-0.5225
LOC100289561	4	0.0092911	0.03124	0.342394	1723	2	-0.63637	0.24337	0.39461	0.997172	7471	1	-0.63637
HJURP	4	0.0093207	0.031325	0.342878	1724	3	-1.2834	0.49347	0.63486	1	11302	1	-1.2834
GOLGA8M	4	0.009325	0.031335	0.342878	1725	3	-0.84636	0.8679	0.86779	1	15047	0	-0.84636
NRBP1	4	0.0093267	0.031339	0.342878	1726	4	-1.9141	0.98859	0.9886	1	17568	0	-1.9141
RPAP3	4	0.0093623	0.031461	0.344015	1727	2	-0.9439	0.64656	0.70564	1	12396	1	-0.9439
SUPT16H	4	0.0093682	0.031483	0.344057	1728	3	-1.8392	0.85108	0.85095	1	14758	0	-1.8392
RBMY1A1	4	0.0093841	0.031533	0.344072	1729	4	-1.0109	0.99062	0.99061	1	17652	0	-1.0109
LSM5	4	0.009386	0.031536	0.344072	1730	3	-1.2841	0.4993	0.63725	1	11339	1	-1.2841
CHMP5	4	0.009392	0.031557	0.344072	1731	3	-1.885	0.2202	0.37197	0.983559	7138	1	-1.885
SLC35E2	4	0.0093937	0.031564	0.344072	1732	4	-0.69106	0.99061	0.9906	1	17651	0	-0.69106
PMVK	4	0.0094004	0.031582	0.344072	1733	3	-1.1337	0.86683	0.8667	1	15023	0	-1.1337
GOLGA6B	4	0.0094056	0.031598	0.344072	1734	3	-1.2337	0.90214	0.90213	1	15662	0	-1.2337
RETN	4	0.0094099	0.031612	0.344072	1735	3	-1.1508	0.86456	0.86446	1	14977	0	-1.1508
SYNCRIP	4	0.0094239	0.031647	0.344256	1736	3	-1.8897	0.58514	0.67476	1	11926	1	-1.8897
UBALD2	4	0.0094386	0.031693	0.34456	1737	4	-0.75304	0.99056	0.99054	1	17649	0	-0.75304
ABCF2	4	0.0094442	0.031714	0.344589	1738	4	-0.6638	0.99056	0.99054	1	17648	0	-0.6638
CPSF6	4	0.0094691	0.031797	0.345285	1739	4	-0.53716	0.99053	0.99052	1	17647	0	-0.53716
CENPI	4	0.0094814	0.031833	0.345304	1740	2	-2.1396	0.75805	0.77317	1	13448	1	-2.1396
MANEAL	4	0.0094844	0.031842	0.345304	1741	4	-0.59763	0.99052	0.9905	1	17646	0	-0.59763
NRF1	4	0.0094874	0.031853	0.345304	1742	2	-1.7559	0.58969	0.6769	1	11957	1	-1.7559
RFX1	4	0.0095076	0.031914	0.345759	1743	3	-1.0476	0.81964	0.82151	1	14256	1	-1.0476
BUB1	4	0.0095383	0.032016	0.346674	1744	2	-2.5987	0.75684	0.77234	1	13434	1	-2.5987
RGPD1	4	0.0095449	0.032035	0.346674	1745	4	-1.0676	0.99046	0.99044	1	17645	0	-1.0676
LYPD2	4	0.0096131	0.032255	0.348851	1746	4	-0.79808	0.99039	0.99038	1	17644	0	-0.79808
INSR	4	0.0096424	0.032353	0.349717	1747	4	-0.64753	0.99036	0.99035	1	17643	0	-0.64753
PTDSS1	4	0.0096792	0.032474	0.350825	1748	3	-1.6023	0.66705	0.71668	1	12566	1	-1.6023
TNRC18	4	0.0097098	0.032576	0.351593	1749	3	-1.0779	0.89831	0.89821	1	15591	0	-1.0779
RFWD3	4	0.0097159	0.032597	0.351593	1750	3	-1.2537	0.81922	0.82114	1	14248	1	-1.2537
SSBP4	4	0.0097164	0.032601	0.351593	1751	3	-1.3702	0.42988	0.57789	1	10423	1	-1.3702
PDXK	4	0.009727	0.03263	0.351703	1752	3	-1.045	0.16051	0.31335	0.947166	6244	1	-1.045
MT2A	4	0.0097377	0.032665	0.351875	1753	3	-1.1872	0.67007	0.71836	1	12589	1	-1.1872
CCAR1	4	0.0097564	0.032716	0.352233	1754	3	-0.77743	0.9764	0.97655	1	17200	0	-0.77743
MOXD1	4	0.0097884	0.032819	0.352885	1755	3	-1.2468	0.36554	0.51448	1	9383	1	-1.2468
AP1M1	4	0.0097933	0.032832	0.352885	1756	4	-0.47139	0.99021	0.99019	1	17640	0	-0.47139
TECR	4	0.0098015	0.032851	0.352885	1757	4	-0.43873	0.9902	0.99018	1	17639	0	-0.43873
CCDC124	4	0.0098018	0.032852	0.352885	1758	4	-0.97992	0.9813	0.98132	1	17333	0	-0.97992
LOC113230	4	0.0098247	0.032935	0.353579	1759	4	-1.2655	0.99018	0.99015	1	17638	0	-1.2655
CAND1	4	0.0098346	0.032961	0.353659	1760	4	-0.64701	0.99017	0.99014	1	17637	0	-0.64701
IPO11	4	0.0098554	0.033016	0.353915	1761	3	-1.8831	0.93074	0.93084	1	16205	0	-1.8831
GAK	4	0.0098581	0.033023	0.353915	1762	3	-0.89032	0.74273	0.76262	1	13297	1	-0.89032
RSF1	4	0.0099293	0.03324	0.35604	1763	4	-0.76394	0.99007	0.99004	1	17635	0	-0.76394
RPL28	4	0.0099443	0.033292	0.356214	1764	4	-1.2563	0.99006	0.99002	1	17634	0	-1.2563
TIGD3	4	0.0099469	0.033298	0.356214	1765	2	-0.90423	0.92934	0.92943	1	16181	0	-0.90423
ARL2	4	0.0099526	0.033313	0.356214	1766	4	-1.0938	0.99005	0.99001	1	17633	0	-1.0938
C18orf21	4	0.0099605	0.033337	0.356276	1767	3	-1.4276	0.84655	0.84645	1	14675	1	-1.4276
ZC3H8	4	0.0099767	0.033386	0.356595	1768	3	-0.86094	0.40648	0.5547	1	10041	1	-0.86094
OGFR	4	0.010004	0.033476	0.357356	1769	4	-0.62694	0.99	0.98996	1	17632	0	-0.62694
SEPT9	4	0.010033	0.033565	0.358105	1770	4	-0.68253	0.98997	0.98994	1	17631	0	-0.68253
KRTAP2-3	4	0.010045	0.0336	0.358272	1771	4	-0.32145	0.98996	0.98992	1	17630	0	-0.32145
PET100	4	0.010088	0.033731	0.359472	1772	3	-1.0732	0.84909	0.84897	1	14725	0	-1.0732
BCAS2	4	0.010115	0.033814	0.360152	1773	3	-1.2677	0.89601	0.89594	1	15542	0	-1.2677
POLR3A	4	0.010122	0.033844	0.360267	1774	4	-1.1911	0.98988	0.98984	1	17626	0	-1.1911
FBXL12	4	0.010149	0.033918	0.360845	1775	4	-0.64016	0.98985	0.98982	1	17625	0	-0.64016
PSME4	4	0.010192	0.034058	0.361843	1776	3	-0.84013	0.91218	0.91217	1	15859	0	-0.84013
C19orf70	4	0.010196	0.034069	0.361843	1777	3	-1.105	0.40483	0.55309	1	10013	1	-1.105
MROH8	4	0.010196	0.034069	0.361843	1778	4	-0.48615	0.9898	0.98977	1	17624	0	-0.48615
SMG7	4	0.010217	0.034134	0.362327	1779	4	-1.2105	0.98823	0.98824	1	17551	0	-1.2105
PEX11G	4	0.010234	0.034189	0.362489	1780	4	-0.46486	0.98977	0.98973	1	17621	0	-0.46486
ACTB	4	0.010236	0.034196	0.362489	1781	4	-0.82532	0.98976	0.98973	1	17620	0	-0.82532
HUS1	4	0.010239	0.034206	0.362489	1782	4	-0.67721	0.98976	0.98972	1	17619	0	-0.67721
OR4F16	4	0.010269	0.034303	0.363313	1783	4	-0.5738	0.98973	0.9897	1	17617	0	-0.5738
MRE11A	4	0.010292	0.034374	0.363853	1784	2	-0.8752	0.91279	0.91276	1	15869	0	-0.8752
EXOSC1	4	0.010305	0.034424	0.364176	1785	3	-1.191	0.97717	0.97734	1	17219	0	-1.191
RAD50	4	0.010315	0.03446	0.364355	1786	4	-1.06	0.98969	0.98965	1	17615	0	-1.06
MMACHC	4	0.01033	0.034511	0.364688	1787	4	-0.71008	0.98967	0.98964	1	17614	0	-0.71008
MRPS22	4	0.010393	0.034718	0.366677	1788	3	-1.0696	0.58269	0.6736	1	11909	1	-1.0696
SLC25A28	4	0.010423	0.034827	0.367484	1789	4	-0.92064	0.98958	0.98955	1	17613	0	-0.92064
DPPA3	4	0.010427	0.034834	0.367484	1790	3	-1.0015	0.39433	0.54277	1	9860	1	-1.0015
TRIM73	4	0.010457	0.034927	0.368151	1791	4	-0.61101	0.98954	0.98952	1	17612	0	-0.61101
AP4B1	4	0.010465	0.03495	0.368151	1792	4	-0.39693	0.98954	0.98951	1	17611	0	-0.39693
POLE2	4	0.010466	0.034955	0.368151	1793	3	-1.1412	0.93356	0.93364	1	16268	0	-1.1412
ZBTB45	4	0.010496	0.035049	0.368933	1794	4	-0.95426	0.9895	0.98948	1	17610	0	-0.95426
SENP8	4	0.010511	0.0351	0.369263	1795	4	-0.40204	0.98949	0.98947	1	17609	0	-0.40204
CCNL2	4	0.01052	0.035134	0.369271	1796	4	-0.76432	0.98948	0.98946	1	17608	0	-0.76432
OR7E24	4	0.010522	0.03514	0.369271	1797	4	-1.4199	0.98948	0.98946	1	17607	0	-1.4199
MRPL40	4	0.010548	0.035216	0.369864	1798	3	-1.1455	0.91396	0.91396	1	15897	0	-1.1455
FRG1	4	0.010561	0.035255	0.370047	1799	4	-0.70108	0.98944	0.98942	1	17606	0	-0.70108
NAA35	4	0.010568	0.035272	0.370047	1800	3	-1.725	0.9501	0.95015	1	16594	0	-1.725
BSG	4	0.01058	0.035312	0.370254	1801	4	-0.74673	0.98942	0.98941	1	17605	0	-0.74673
USF2	4	0.010592	0.035353	0.370419	1802	4	-1.2935	0.98836	0.98837	1	17560	0	-1.2935
VPS33A	4	0.010598	0.035367	0.370419	1803	3	-0.9591	0.9557	0.95575	1	16702	0	-0.9591
BOLA2B	4	0.010613	0.035406	0.370626	1804	4	-0.6123	0.98939	0.98938	1	17604	0	-0.6123
CHAMP1	4	0.010625	0.035449	0.370865	1805	4	-0.55327	0.98937	0.98937	1	17603	0	-0.55327
KIAA2013	4	0.010654	0.035534	0.371548	1806	3	-1.1485	0.73545	0.75773	1	13215	1	-1.1485
CRLF1	4	0.010699	0.03566	0.372668	1807	4	-0.51485	0.9893	0.98929	1	17599	0	-0.51485
WNK4	4	0.010717	0.035712	0.372998	1808	4	-0.9267	0.98928	0.98928	1	17598	0	-0.9267
SON	4	0.010727	0.035748	0.373175	1809	4	-0.90646	0.98927	0.98927	1	17597	0	-0.90646
NUP88	4	0.010737	0.035778	0.373276	1810	4	-2.6416	0.98563	0.98562	1	17473	0	-2.6416
HDAC3	4	0.010769	0.035877	0.3741	1811	4	-1.7395	0.98652	0.98648	1	17508	0	-1.7395
NIFK	4	0.010775	0.035904	0.3741	1812	3	-1.1721	0.65165	0.70833	1	12433	1	-1.1721
STXBP3	4	0.010778	0.035916	0.3741	1813	3	-1.0399	0.51455	0.64347	1	11438	1	-1.0399
ARID1B	4	0.010793	0.035961	0.374357	1814	3	-0.6851	0.31165	0.46163	1	8517	1	-0.6851
PTPN23	4	0.010807	0.036007	0.374637	1815	4	-1.2905	0.98919	0.98918	1	17594	0	-1.2905
ROMO1	4	0.01082	0.036048	0.374856	1816	3	-1.9536	0.87738	0.87734	1	15218	0	-1.9536
WDR25	4	0.010855	0.03615	0.375701	1817	4	-0.85914	0.98914	0.98915	1	17591	0	-0.85914
SARS	4	0.010884	0.036243	0.376469	1818	2	-1.794	0.845	0.84489	1	14642	1	-1.794
RFT1	4	0.01089	0.036264	0.37648	1819	3	-1.7268	0.22917	0.38081	0.989795	7261	1	-1.7268
SYT10	4	0.010916	0.036342	0.377078	1820	4	-0.50807	0.98908	0.98908	1	17590	0	-0.50807
MIS12	4	0.010927	0.036376	0.377224	1821	4	-1.0359	0.98907	0.98907	1	17589	0	-1.0359
TRIM49D2	4	0.010941	0.036413	0.377398	1822	4	-0.50951	0.98906	0.98906	1	17588	0	-0.50951
RANBP1	4	0.010956	0.036448	0.37756	1823	4	-0.43297	0.98904	0.98904	1	17586	0	-0.43297
C19orf43	4	0.010988	0.036548	0.378384	1824	4	-1.0873	0.98901	0.98901	1	17585	0	-1.0873
DDX24	4	0.011005	0.036602	0.378731	1825	3	-1.2074	0.9668	0.96683	1	16965	0	-1.2074
ANKRD20A3	4	0.011031	0.03669	0.379237	1826	2	-0.60664	0.8303	0.8311	1	14411	1	-0.60664
CPT1C	4	0.011031	0.036691	0.379237	1827	4	-0.84953	0.98897	0.98896	1	17582	0	-0.84953
TOMM7	4	0.011048	0.036746	0.379604	1828	3	-0.65771	0.92007	0.92017	1	16001	0	-0.65771
MASP2	4	0.011059	0.036779	0.379661	1829	3	-0.7682	0.43259	0.58052	1	10462	1	-0.7682
TRIM4	4	0.011069	0.036801	0.379661	1830	4	-0.36104	0.98893	0.98893	1	17581	0	-0.36104
ADAT3	4	0.011076	0.036825	0.379661	1831	4	-1.1112	0.98892	0.98892	1	17579	0	-1.1112
ERH	4	0.011088	0.036869	0.379661	1832	2	-1.5549	0.82824	0.82917	1	14381	1	-1.5549
ESRRA	4	0.011089	0.03687	0.379661	1833	4	-1.0852	0.98891	0.98891	1	17578	0	-1.0852
CRYGA	4	0.011091	0.036878	0.379661	1834	4	-0.82194	0.98891	0.9889	1	17577	0	-0.82194
C1QTNF9B	4	0.011101	0.036913	0.379661	1835	4	-0.68771	0.9889	0.98889	1	17576	0	-0.68771
METTL7B	4	0.011108	0.03693	0.379661	1836	3	-1.4996	0.93849	0.93851	1	16365	0	-1.4996
DONSON	4	0.011113	0.03695	0.379661	1837	3	-1.7121	0.96308	0.96309	1	16875	0	-1.7121
NFYC	4	0.011114	0.036953	0.379661	1838	2	-0.49537	0.24783	0.39906	1	7525	1	-0.49537
ATP5SL	4	0.011179	0.037147	0.381447	1839	3	-0.9328	0.94436	0.94442	1	16482	0	-0.9328
ZC3H3	4	0.011232	0.037311	0.382923	1840	4	-0.83262	0.98877	0.98877	1	17574	0	-0.83262
SPRR2A	4	0.011247	0.03736	0.383216	1841	4	-0.84377	0.98875	0.98876	1	17573	0	-0.84377
HMGA1	4	0.011262	0.037406	0.383401	1842	4	-0.9568	0.98874	0.98874	1	17572	0	-0.9568
STAB1	4	0.011266	0.037418	0.383401	1843	3	-1.1277	0.35584	0.50492	1	9229	1	-1.1277
RBBP6	4	0.011305	0.037547	0.384509	1844	3	-1.441	0.94705	0.9471	1	16536	0	-1.441
GATB	4	0.011337	0.037642	0.385272	1845	4	-0.81917	0.98866	0.98867	1	17571	0	-0.81917
NUP133	4	0.011347	0.037673	0.385385	1846	3	-1.2187	0.87268	0.8726	1	15128	0	-1.2187
AGBL5	4	0.011359	0.037715	0.3856	1847	4	-0.85448	0.98864	0.98865	1	17570	0	-0.85448
DIP2B	4	0.011424	0.037923	0.387518	1848	4	-0.51918	0.98858	0.98859	1	17567	0	-0.51918
MRPL50	4	0.011466	0.038046	0.388567	1849	4	-0.46084	0.98853	0.98854	1	17566	0	-0.46084
VPS16	4	0.011492	0.038119	0.389101	1850	4	-1.3167	0.98851	0.98852	1	17564	0	-1.3167
CDR2L	4	0.011516	0.038186	0.389575	1851	3	-0.93984	0.70345	0.73768	1	12880	1	-0.93984
RAB21	4	0.011528	0.038222	0.389729	1852	3	-1.3718	0.91327	0.91326	1	15877	0	-1.3718
UPF2	4	0.011549	0.038298	0.390298	1853	3	-1.1456	0.97641	0.97656	1	17202	0	-1.1456
SMARCA4	4	0.011574	0.038367	0.390787	1854	4	-1.2358	0.98215	0.98215	1	17353	0	-1.2358
AP4S1	4	0.01158	0.038392	0.390828	1855	4	-0.66173	0.98842	0.98844	1	17563	0	-0.66173
KNCN	4	0.011612	0.038488	0.391462	1856	4	-0.55372	0.98839	0.9884	1	17561	0	-0.55372
KRTAP4-7	4	0.011615	0.038495	0.391462	1857	2	-0.69735	0.77435	0.78497	1	13642	1	-0.69735
MPO	4	0.011665	0.038646	0.392714	1858	3	-0.65819	0.92825	0.92839	1	16156	0	-0.65819
HEXIM1	4	0.011668	0.03866	0.392714	1859	4	-0.73571	0.98833	0.98835	1	17559	0	-0.73571
NCAPD3	4	0.011679	0.03869	0.392811	1860	4	-0.55356	0.98832	0.98834	1	17558	0	-0.55356
RBM42	4	0.01172	0.038826	0.393973	1861	3	-0.98725	0.40977	0.55797	1	10092	1	-0.98725
TM2D1	4	0.011732	0.038865	0.394097	1862	4	-0.40279	0.98827	0.98828	1	17556	0	-0.40279
CCNF	4	0.011738	0.03888	0.394097	1863	4	-0.52846	0.98826	0.98828	1	17554	0	-0.52846
CDC20	4	0.011747	0.03891	0.394188	1864	3	-1.884	0.011056	0.036769	0.699169	989	1	-1.884
GTPBP6	4	0.011764	0.038973	0.394498	1865	4	-0.78684	0.98824	0.98824	1	17552	0	-0.78684
RRP36	4	0.011767	0.038982	0.394498	1866	2	-1.4824	0.95094	0.95098	1	16616	0	-1.4824
DBR1	4	0.011803	0.039079	0.395273	1867	3	-2.332	0.97439	0.97451	1	17150	0	-2.332
AGAP5	4	0.011833	0.039183	0.396106	1868	3	-1.1615	0.83463	0.83508	1	14469	1	-1.1615
HIST1H2BE	4	0.011848	0.039229	0.39636	1869	3	-0.92199	0.93058	0.93069	1	16203	0	-0.92199
DPH1	4	0.011859	0.039257	0.396386	1870	3	-1.1528	0.82981	0.83065	1	14402	1	-1.1528
ZFR	4	0.011865	0.039273	0.396386	1871	4	-0.37592	0.98813	0.98814	1	17548	0	-0.37592
RIN1	4	0.011887	0.039331	0.39656	1872	3	-0.87926	0.20665	0.3587	0.977451	6929	1	-0.87926
USHBP1	4	0.011888	0.039333	0.39656	1873	4	-0.62385	0.98811	0.98812	1	17547	0	-0.62385
METTL1	4	0.011963	0.039573	0.398774	1874	4	-0.85572	0.98804	0.98805	1	17544	0	-0.85572
TDGF1	4	0.012055	0.039854	0.401309	1875	3	-1.1854	0.26746	0.41828	1	7847	1	-1.1854
MRPL13	4	0.012059	0.039867	0.401309	1876	3	-1.606	0.61363	0.68863	1	12147	1	-1.606
NPY4R	4	0.012082	0.039937	0.401797	1877	4	-0.55805	0.98792	0.98793	1	17542	0	-0.55805
POLE3	4	0.012101	0.040004	0.402213	1878	4	-1.0371	0.9879	0.98791	1	17541	0	-1.0371
C12orf65	4	0.012107	0.040021	0.402213	1879	4	-0.43315	0.98789	0.98791	1	17540	0	-0.43315
YBEY	4	0.012149	0.040143	0.403226	1880	3	-1.3552	0.90611	0.9061	1	15741	0	-1.3552
PRAMEF1	4	0.01216	0.040186	0.403438	1881	3	-1.0523	0.31157	0.46153	1	8516	1	-1.0523
SKA2	4	0.012177	0.040232	0.40356	1882	4	-0.75764	0.98782	0.98783	1	17539	0	-0.75764
KIAA1683	4	0.012189	0.040283	0.40356	1883	4	-0.70525	0.98781	0.98781	1	17538	0	-0.70525
TRMU	4	0.012192	0.04029	0.40356	1884	3	-0.79037	0.98029	0.98036	1	17307	0	-0.79037
DSCC1	4	0.012194	0.040297	0.40356	1885	4	-0.71802	0.98781	0.98781	1	17537	0	-0.71802
SEC14L1	4	0.012196	0.040305	0.40356	1886	4	-0.87927	0.9878	0.9878	1	17536	0	-0.87927
GEMIN7	4	0.012207	0.040337	0.403671	1887	3	-1.4401	0.96516	0.96519	1	16923	0	-1.4401
PMF1	4	0.012225	0.040386	0.403945	1888	4	-1.1625	0.98578	0.98575	1	17480	0	-1.1625
HELZ2	4	0.012252	0.040481	0.404685	1889	3	-0.87769	0.59484	0.67939	1	11998	1	-0.87769
TIMM9	4	0.012272	0.040545	0.40511	1890	3	-1.0812	0.91019	0.91017	1	15823	0	-1.0812
CCDC182	4	0.012294	0.040616	0.405603	1891	3	-1.0535	0.69329	0.7317	1	12789	1	-1.0535
BAZ1B	4	0.012318	0.040687	0.4061	1892	4	-0.81531	0.98768	0.98768	1	17532	0	-0.81531
NUDC	4	0.012345	0.040771	0.406654	1893	3	-2.2686	0.92108	0.92119	1	16023	0	-2.2686
KRTAP9-4	4	0.012349	0.040786	0.406654	1894	3	-1.1595	0.08285	0.1853	0.88394	3955	1	-1.1595
NOL8	4	0.012396	0.040921	0.407782	1895	3	-1.4502	0.86739	0.86728	1	15036	0	-1.4502
KANK2	4	0.012419	0.040999	0.408351	1896	4	-0.81492	0.98758	0.98756	1	17530	0	-0.81492
WDR75	4	0.012439	0.041065	0.408793	1897	4	-1.0149	0.98756	0.98755	1	17529	0	-1.0149
SPC24	4	0.012477	0.04118	0.409575	1898	4	-2.0638	0.98733	0.9873	1	17525	0	-2.0638
DDX43	4	0.012487	0.041209	0.409575	1899	4	-0.81172	0.98751	0.9875	1	17528	0	-0.81172
OIP5	4	0.012509	0.041275	0.410011	1900	3	-1.5194	0.78031	0.78943	1	13708	1	-1.5194
NDUFA6	4	0.01255	0.041393	0.410967	1901	4	-1.2227	0.98745	0.98744	1	17527	0	-1.2227
KIF14	4	0.012566	0.041435	0.411117	1902	3	-1.2079	0.909	0.90898	1	15803	0	-1.2079
RTN4IP1	4	0.01257	0.041451	0.411117	1903	4	-1.4119	0.98743	0.98741	1	17526	0	-1.4119
ISG20L2	4	0.012593	0.041526	0.411631	1904	4	-1.477	0.98289	0.98291	1	17380	0	-1.477
DCPS	4	0.0126	0.041547	0.411631	1905	4	-2.3213	0.98572	0.98569	1	17477	0	-2.3213
CPSF7	4	0.012646	0.041691	0.412843	1906	3	-0.99398	0.9502	0.95025	1	16596	0	-0.99398
PSMB6	4	0.012659	0.041728	0.41299	1907	3	-1.2934	0.81627	0.81857	1	14203	1	-1.2934
GAPDHS	4	0.012675	0.041775	0.413241	1908	3	-0.91201	0.91052	0.91048	1	15830	0	-0.91201
TPRKB	4	0.0127	0.041853	0.413797	1909	3	-1.0241	0.86112	0.86097	1	14921	0	-1.0241
RACGAP1	4	0.012737	0.041955	0.41459	1910	3	-0.97432	0.94275	0.94281	1	16448	0	-0.97432
DHDDS	4	0.012751	0.042002	0.414834	1911	2	-0.65454	0.14392	0.29102	0.936224	5867	2	-0.65454
FAM171A2	4	0.01276	0.042038	0.414969	1912	4	-0.59504	0.98724	0.9872	1	17524	0	-0.59504
ANKRD36	4	0.012785	0.042119	0.415281	1913	3	-1.0632	0.82201	0.8236	1	14292	1	-1.0632
LOC100144595	4	0.012792	0.042137	0.415281	1914	2	-1.6475	0.0092151	0.030993	0.677398	863	2	-1.6475
MST1L	4	0.012795	0.042148	0.415281	1915	3	-1.2932	0.72232	0.7494	1	13077	1	-1.2932
MRPS33	4	0.012799	0.042157	0.415281	1916	3	-0.86513	0.6368	0.70044	1	12334	1	-0.86513
LPPR2	4	0.012806	0.042181	0.415297	1917	4	-0.78837	0.98719	0.98716	1	17523	0	-0.78837
SUV39H1	4	0.012823	0.042221	0.41539	1918	3	-0.88509	0.93631	0.93633	1	16323	0	-0.88509
MED9	4	0.012827	0.042234	0.41539	1919	4	-0.70737	0.98329	0.98328	1	17390	0	-0.70737
LAMTOR4	4	0.012862	0.042333	0.416148	1920	3	-1.1917	0.43297	0.5809	1	10472	1	-1.1917
MTERF4	4	0.012901	0.042466	0.41724	1921	4	-0.60013	0.9871	0.98706	1	17522	0	-0.60013
ARHGEF33	4	0.012925	0.042536	0.417469	1922	3	-1.3107	0.78577	0.79369	1	13780	1	-1.3107
VPS37A	4	0.012928	0.042549	0.417469	1923	3	-1.0123	0.88786	0.88782	1	15416	0	-1.0123
BIRC6	4	0.01293	0.042556	0.417469	1924	3	-1.2795	0.97722	0.97738	1	17221	0	-1.2795
CGB2	4	0.013005	0.042786	0.419292	1925	3	-1.0666	0.97212	0.97224	1	17100	0	-1.0666
ACTR6	4	0.013005	0.042786	0.419292	1926	4	-1.0869	0.98699	0.98695	1	17520	0	-1.0869
PPIL1	4	0.013047	0.042903	0.420214	1927	3	-0.94066	0.90209	0.90209	1	15660	0	-0.94066
COQ3	4	0.013111	0.043097	0.421733	1928	4	-0.49403	0.98689	0.98684	1	17519	0	-0.49403
NUP35	4	0.013114	0.043102	0.421733	1929	4	-1.6673	0.98689	0.98684	1	17518	0	-1.6673
SREBF2	4	0.013193	0.043336	0.423797	1930	4	-0.77313	0.98681	0.98676	1	17517	0	-0.77313
MDM1	4	0.013285	0.043626	0.426416	1931	4	-0.9637	0.98672	0.98667	1	17514	0	-0.9637
TGS1	4	0.013347	0.043818	0.428071	1932	2	-1.1495	0.7447	0.76396	1	13322	1	-1.1495
CD58	4	0.013362	0.043855	0.428208	1933	4	-0.94245	0.98664	0.98658	1	17513	0	-0.94245
MBD3L4	4	0.013408	0.043997	0.429223	1934	4	-0.54962	0.98659	0.98654	1	17512	0	-0.54962
AMZ1	4	0.01341	0.044004	0.429223	1935	4	-0.8205	0.98659	0.98654	1	17511	0	-0.8205
MRPS18C	4	0.013427	0.04405	0.429444	1936	3	-1.4345	0.69362	0.7319	1	12792	1	-1.4345
SETD7	4	0.013435	0.044072	0.429444	1937	4	-0.57544	0.98657	0.98652	1	17510	0	-0.57544
WAPAL	4	0.013465	0.04416	0.430017	1938	3	-1.0956	0.96393	0.96396	1	16894	0	-1.0956
SLC7A5	4	0.01347	0.044177	0.430017	1939	4	-0.54458	0.98653	0.98649	1	17509	0	-0.54458
HAL	4	0.013491	0.044247	0.430354	1940	4	-0.43699	0.98651	0.98647	1	17506	0	-0.43699
RALGAPA1	4	0.013495	0.044257	0.430354	1941	4	-0.37963	0.98651	0.98646	1	17505	0	-0.37963
NEURL1	4	0.013523	0.044344	0.430984	1942	4	-0.47852	0.98648	0.98644	1	17504	0	-0.47852
CDCA3	4	0.013549	0.044435	0.431638	1943	4	-1.0284	0.98645	0.98641	1	17502	0	-1.0284
DLX6	4	0.013561	0.04447	0.431757	1944	4	-0.82987	0.98644	0.9864	1	17501	0	-0.82987
CLDN6	4	0.01359	0.044569	0.432363	1945	3	-0.77986	0.21079	0.36278	0.9799	6990	1	-0.77986
ADGRE2	4	0.013596	0.044586	0.432363	1946	3	-1.0635	0.067156	0.15629	0.861093	3426	1	-1.0635
PSPN	4	0.013601	0.044601	0.432363	1947	4	-0.80208	0.9864	0.98636	1	17499	0	-0.80208
HNF1A	4	0.013622	0.044668	0.432796	1948	3	-0.70252	0.5073	0.6405	1	11383	1	-0.70252
CGB7	4	0.013636	0.044705	0.43293	1949	2	-0.49809	0.31716	0.46704	1	8593	2	-0.49809
GTF3C6	4	0.013681	0.044842	0.434027	1950	3	-1.2956	0.97121	0.97129	1	17073	0	-1.2956
BRCA1	4	0.013707	0.044928	0.434642	1951	4	-0.71506	0.98629	0.98627	1	17497	0	-0.71506
CTNNBL1	4	0.013731	0.044997	0.434846	1952	4	-0.82603	0.98627	0.98624	1	17496	0	-0.82603
PSMA1	4	0.013732	0.044998	0.434846	1953	3	-1.3675	0.94057	0.94061	1	16404	0	-1.3675
MYL6B	4	0.013738	0.045018	0.434846	1954	4	-0.69701	0.98626	0.98624	1	17494	0	-0.69701
PIK3CG	4	0.013748	0.045048	0.434912	1955	3	-0.962	0.94158	0.94162	1	16428	0	-0.962
HMOX2	4	0.013788	0.045169	0.435854	1956	4	-0.46173	0.98621	0.9862	1	17492	0	-0.46173
TKT	4	0.013826	0.045299	0.43689	1957	4	-0.8194	0.98617	0.98617	1	17491	0	-0.8194
RRP12	4	0.013848	0.045372	0.43737	1958	3	-1.8979	0.93487	0.93493	1	16289	0	-1.8979
PLVAP	4	0.013868	0.045427	0.437615	1959	3	-1.109	0.4616	0.60916	1	10914	1	-1.109
CCDC88B	4	0.013873	0.045444	0.437615	1960	4	-0.95018	0.98613	0.98612	1	17490	0	-0.95018
MRPL23	4	0.013882	0.04547	0.437627	1961	3	-1.9082	0.96841	0.96846	1	17011	0	-1.9082
NANOGNB	4	0.01389	0.045501	0.437627	1962	1	0.35822	0.034857	0.093959	0.788396	2247	2	0.35822
CCDC64	4	0.013894	0.045515	0.437627	1963	4	-0.57327	0.98611	0.9861	1	17489	0	-0.57327
CFC1B	4	0.013945	0.04566	0.438805	1964	3	-1.0123	0.80435	0.80846	1	14021	1	-1.0123
PMEL	4	0.013979	0.045775	0.439685	1965	3	-0.88069	0.38058	0.52923	1	9638	1	-0.88069
PPL	4	0.013992	0.045821	0.439766	1966	4	-0.7093	0.98601	0.986	1	17488	0	-0.7093
EXOC6	4	0.013995	0.04583	0.439766	1967	3	-0.96843	0.9601	0.96012	1	16806	0	-0.96843
NUP93	4	0.014005	0.04586	0.43983	1968	3	-1.3624	0.54497	0.65643	1	11646	1	-1.3624
SETD8	4	0.014014	0.045891	0.439898	1969	3	-1.2413	0.97308	0.9732	1	17121	0	-1.2413
MAP6	4	0.014031	0.045932	0.439979	1970	4	-0.79134	0.98597	0.98595	1	17486	0	-0.79134
XRN1	4	0.014036	0.045946	0.439979	1971	2	-0.86442	0.32808	0.47771	1	8770	1	-0.86442
SREBF1	4	0.01406	0.046034	0.440604	1972	4	-0.52512	0.98594	0.98592	1	17485	0	-0.52512
SEC23B	4	0.0141	0.046159	0.441361	1973	3	-1.083	0.45558	0.60318	1	10817	1	-1.083
MTBP	4	0.0141	0.04616	0.441361	1974	3	-2.8267	0.96364	0.96367	1	16889	0	-2.8267
GADD45GIP1	4	0.014132	0.046257	0.44206	1975	3	-1.2438	0.93092	0.93103	1	16212	0	-1.2438
CENPL	4	0.014143	0.046292	0.442172	1976	3	-1.285	0.82862	0.82951	1	14385	1	-1.285
NUMA1	4	0.014167	0.046361	0.442614	1977	3	-1.3051	0.90906	0.90905	1	15806	0	-1.3051
LARS	4	0.014187	0.046422	0.442694	1978	4	-1.2978	0.98339	0.98338	1	17395	0	-1.2978
DARS2	4	0.014187	0.046423	0.442694	1979	3	-1.2419	0.83946	0.83957	1	14559	1	-1.2419
AGAP9	4	0.014208	0.046485	0.442694	1980	3	-1.1451	0.92783	0.92796	1	16151	0	-1.1451
DAZ2	4	0.014214	0.046509	0.442694	1981	3	-1.1539	0.86162	0.8615	1	14926	0	-1.1539
PPP1R14B	4	0.014218	0.046516	0.442694	1982	3	-0.88298	0.93056	0.93067	1	16202	0	-0.88298
DYNC1I2	4	0.014221	0.046529	0.442694	1983	3	-1.088	0.97621	0.97638	1	17197	0	-1.088
KIF24	4	0.014223	0.046534	0.442694	1984	4	-0.86847	0.98578	0.98575	1	17478	0	-0.86847
MRPL11	4	0.014262	0.046668	0.443747	1985	3	-1.286	0.84853	0.84841	1	14714	1	-1.286
TACO1	4	0.014298	0.046774	0.444531	1986	4	-0.36679	0.9857	0.98568	1	17476	0	-0.36679
PHKG1	4	0.014306	0.046798	0.444536	1987	3	-0.80754	0.59821	0.68103	1	12026	1	-0.80754
FAM124A	4	0.014331	0.046876	0.444811	1988	4	-0.55406	0.98567	0.98565	1	17475	0	-0.55406
KMT2E	4	0.014335	0.046892	0.444811	1989	4	-0.52179	0.98567	0.98564	1	17474	0	-0.52179
TTC37	4	0.014337	0.046898	0.444811	1990	4	-1.3647	0.9848	0.98479	1	17441	0	-1.3647
CALCB	4	0.014362	0.046971	0.445284	1991	2	-0.4573	0.10651	0.22729	0.905329	4739	1	-0.4573
GSS	4	0.014405	0.04711	0.446372	1992	3	-1.3565	0.025325	0.074663	0.757216	1860	1	-1.3565
TSSK4	4	0.014422	0.047166	0.446515	1993	3	-0.87888	0.97865	0.97878	1	17260	0	-0.87888
ABT1	4	0.014426	0.047172	0.446515	1994	3	-1.3238	0.97908	0.97919	1	17275	0	-1.3238
SLC15A4	4	0.014434	0.047198	0.446539	1995	4	-0.88084	0.98557	0.98555	1	17472	0	-0.88084
RTTN	4	0.014462	0.047291	0.447113	1996	3	-0.96179	0.19802	0.35013	0.971866	6799	1	-0.96179
FXN	4	0.014467	0.047306	0.447113	1997	3	-1.1496	0.94347	0.94355	1	16464	0	-1.1496
GCSH	4	0.014509	0.047436	0.447998	1998	4	-1.4225	0.98549	0.98548	1	17471	0	-1.4225
SRPRB	4	0.014513	0.047447	0.447998	1999	3	-1.1194	0.83558	0.83594	1	14487	1	-1.1194
[truncated: 16,885 more rows]

## Sheet: BC-5
id	num	neg|score	neg|p-value	neg|fdr	neg|rank	neg|goodsgrna	neg|lfc	pos|score	pos|p-value	pos|fdr	pos|rank	pos|goodsgrna	pos|lfc
LOC100507462	4	6.8933e-11	2.6215e-07	0.000309	1	4	-5.2766	0.9999	0.9999	1	18705	0	-5.2766
RPL6	4	3.262e-09	2.6215e-07	0.000309	2	4	-3.1883	1	1	1	18884	0	-3.1883
SPDYE6	4	4.6838e-09	2.6215e-07	0.000309	3	4	-3.0225	1	1	1	18883	0	-3.0225
HSPA5	4	5.3795e-09	2.6215e-07	0.000309	4	4	-3.6189	1	1	1	18882	0	-3.6189
RPL23A	4	1.7493e-08	2.6215e-07	0.000309	5	4	-3.5432	1	1	1	18849	0	-3.5432
RPS8	4	1.9539e-08	2.6215e-07	0.000309	6	4	-4.1026	1	1	1	18881	0	-4.1026
RPL19	4	2.0429e-08	2.6215e-07	0.000309	7	4	-2.0133	1	1	1	18880	0	-2.0133
CCND2	4	2.0794e-08	2.6215e-07	0.000309	8	4	-2.1948	1	1	1	18879	0	-2.1948
PSMB4	4	2.5029e-08	2.6215e-07	0.000309	9	4	-3.1136	1	1	1	18878	0	-3.1136
LUC7L3	4	2.9283e-08	2.6215e-07	0.000309	10	4	-2.2233	1	1	1	18877	0	-2.2233
SNRPD3	4	3.8511e-08	2.6215e-07	0.000309	11	4	-4.183	1	1	1	18876	0	-4.183
PSMA5	4	4.2128e-08	2.6215e-07	0.000309	12	4	-2.3489	1	1	1	18875	0	-2.3489
FAU	4	5.6046e-08	2.6215e-07	0.000309	13	4	-2.1269	1	1	1	18874	0	-2.1269
HIRA	4	5.9804e-08	2.6215e-07	0.000309	14	4	-2.3803	1	1	1	18873	0	-2.3803
SLC2A1	4	6.9912e-08	2.6215e-07	0.000309	15	4	-1.9463	1	1	1	18872	0	-1.9463
POLR2L	4	1.0183e-07	2.6215e-07	0.000309	16	4	-2.783	1	1	1	18871	0	-2.783
PSMA7	4	1.2051e-07	7.8646e-07	0.000743	17	4	-3.3404	1	1	1	18870	0	-3.3404
RPS18	4	1.7388e-07	7.8646e-07	0.000743	18	4	-2.4726	1	1	1	18869	0	-2.4726
RPS20	4	1.7478e-07	7.8646e-07	0.000743	19	4	-2.4343	1	1	1	18868	0	-2.4343
BUB3	4	1.8973e-07	7.8646e-07	0.000743	20	4	-2.1164	1	1	1	18867	0	-2.1164
ZNF626	4	2.0562e-07	1.0486e-06	0.000943	21	4	-3.4384	1	1	1	18866	0	-3.4384
FAM231A	4	2.3865e-07	1.3108e-06	0.001076	22	4	-1.9062	1	1	1	18865	0	-1.9062
RPS16	4	3.023e-07	1.3108e-06	0.001076	23	4	-2.7925	0.98788	0.98789	1	17986	0	-2.7925
RPL17-C18orf32	4	3.1964e-07	1.8351e-06	0.001142	24	3	-2.9682	0.94993	0.94997	1	17006	0	-2.9682
PRPF19	4	3.2506e-07	1.8351e-06	0.001142	25	4	-1.8457	1	1	1	18864	0	-1.8457
PLK1	4	3.4498e-07	1.8351e-06	0.001142	26	4	-2.6296	1	1	1	18863	0	-2.6296
NXF1	4	3.5944e-07	1.8351e-06	0.001142	27	4	-2.4544	1	0.99999	1	18819	0	-2.4544
HSPA8	4	3.8591e-07	2.3594e-06	0.001142	28	4	-2.3461	1	1	1	18862	0	-2.3461
DDX23	4	4.5864e-07	2.3594e-06	0.001142	29	4	-2.1862	1	1	1	18861	0	-2.1862
UHRF1	4	4.6805e-07	2.3594e-06	0.001142	30	4	-2.0808	1	1	1	18860	0	-2.0808
RPL8	4	4.69e-07	2.3594e-06	0.001142	31	4	-3.1997	1	1	1	18859	0	-3.1997
RPL13	4	5.2655e-07	2.3594e-06	0.001142	32	4	-3.1181	1	1	1	18853	0	-3.1181
IRF4	4	5.5832e-07	2.3594e-06	0.001142	33	4	-2.2254	1	1	1	18858	0	-2.2254
PIM2	4	5.6266e-07	2.3594e-06	0.001142	34	4	-2.009	1	1	1	18857	0	-2.009
PSMA4	4	5.6434e-07	2.3594e-06	0.001142	35	4	-3.1187	0.99987	0.99988	1	18690	0	-3.1187
DNA2	4	5.7806e-07	2.3594e-06	0.001142	36	4	-2.6199	1	1	1	18856	0	-2.6199
DPH3	4	5.87e-07	2.3594e-06	0.001142	37	4	-1.5927	1	1	1	18855	0	-1.5927
RPLP2	4	6.2027e-07	2.3594e-06	0.001142	38	4	-2.8508	1	1	1	18854	0	-2.8508
HSPD1	4	6.6352e-07	2.3594e-06	0.001142	39	4	-2.8997	1	1	1	18852	0	-2.8997
RANGAP1	4	6.8723e-07	2.8837e-06	0.001266	40	4	-2.2193	1	1	1	18851	0	-2.2193
EEF1A1	4	7.1833e-07	2.8837e-06	0.001266	41	4	-4.0137	1	1	1	18826	0	-4.0137
ZCCHC8	4	7.2597e-07	2.8837e-06	0.001266	42	4	-1.3442	1	1	1	18850	0	-1.3442
NUTF2	4	8.1851e-07	2.8837e-06	0.001266	43	4	-3.3831	0.99621	0.99622	1	18282	0	-3.3831
RPP21	4	9.4565e-07	3.408e-06	0.00143	44	3	-2.6901	0.92255	0.92267	1	16394	0	-2.6901
PHB	4	9.74e-07	3.408e-06	0.00143	45	4	-1.9248	1	1	1	18848	0	-1.9248
ITPK1	4	9.9553e-07	3.9323e-06	0.001547	46	4	-1.5921	1	1	1	18847	0	-1.5921
SMU1	4	1.0012e-06	3.9323e-06	0.001547	47	4	-2.9278	1	1	1	18841	0	-2.9278
PRIM1	4	1.0242e-06	3.9323e-06	0.001547	48	4	-2.0452	1	1	1	18846	0	-2.0452
YARS2	4	1.2607e-06	4.4566e-06	0.00165	49	4	-2.324	1	1	1	18845	0	-2.324
UTP20	4	1.3236e-06	4.4566e-06	0.00165	50	4	-1.735	1	1	1	18844	0	-1.735
CDK1	4	1.3507e-06	4.4566e-06	0.00165	51	4	-2.2692	1	1	1	18843	0	-2.2692
RPS6	4	1.3953e-06	4.9809e-06	0.001809	52	4	-1.9652	1	1	1	18842	0	-1.9652
RPL31	4	1.6523e-06	5.5052e-06	0.001962	53	4	-2.0482	1	1	1	18840	0	-2.0482
ATP7A	4	1.7934e-06	6.0295e-06	0.002033	54	4	-1.3493	1	1	1	18839	0	-1.3493
TAF6	4	1.796e-06	6.0295e-06	0.002033	55	4	-3.1826	1	1	1	18838	0	-3.1826
NHP2	4	1.8459e-06	6.0295e-06	0.002033	56	4	-1.9297	1	1	1	18837	0	-1.9297
TAF4	4	2.0878e-06	7.0781e-06	0.002305	57	4	-1.3249	1	1	1	18836	0	-1.3249
EIF6	4	2.1029e-06	7.0781e-06	0.002305	58	4	-2.7645	0.99974	0.99974	1	18631	0	-2.7645
NIPBL	4	2.1466e-06	7.6024e-06	0.002354	59	4	-2.1757	1	1	1	18835	0	-2.1757
MCL1	4	2.2097e-06	7.6024e-06	0.002354	60	4	-2.869	1	1	1	18834	0	-2.869
RPS11	4	2.2495e-06	7.6024e-06	0.002354	61	4	-3.2292	1	1	1	18833	0	-3.2292
RPLP0	4	2.4138e-06	8.1267e-06	0.002398	62	4	-2.241	1	1	1	18832	0	-2.241
TICRR	4	2.5463e-06	8.1267e-06	0.002398	63	4	-2.6697	1	1	1	18831	0	-2.6697
VCP	4	2.5632e-06	8.1267e-06	0.002398	64	4	-2.3637	1	1	1	18830	0	-2.3637
PSMA6	4	2.8863e-06	1.0748e-05	0.003123	65	4	-2.4666	1	1	1	18829	0	-2.4666
ARPC4	4	3.0299e-06	1.1273e-05	0.003177	66	4	-1.7429	1	1	1	18828	0	-1.7429
GCN1L1	4	3.0376e-06	1.1273e-05	0.003177	67	4	-1.6563	1	1	1	18827	0	-1.6563
ATP5A1	4	3.3249e-06	1.2321e-05	0.003324	68	4	-2.0139	1	1	1	18825	0	-2.0139
RPSA	4	3.4101e-06	1.2321e-05	0.003324	69	3	-3.4039	0.96564	0.96566	1	17371	0	-3.4039
RPA3	4	3.4759e-06	1.2321e-05	0.003324	70	4	-2.3621	1	1	1	18824	0	-2.3621
SETDB1	4	3.6057e-06	1.2845e-05	0.003417	71	4	-1.7268	1	1	1	18823	0	-1.7268
GNL3	4	3.8575e-06	1.4418e-05	0.003679	72	4	-2.0006	1	1	1	18822	0	-2.0006
C14orf80	4	3.9954e-06	1.4418e-05	0.003679	73	4	-2.6652	0.99997	0.99997	1	18757	0	-2.6652
NAA10	4	4.0271e-06	1.4418e-05	0.003679	74	4	-1.6867	0.98906	0.98906	1	18023	0	-1.6867
RPS19	4	4.1555e-06	1.4943e-05	0.003762	75	4	-3.4338	0.99971	0.99971	1	18622	0	-3.4338
PPP4C	4	4.2301e-06	1.5205e-05	0.003778	76	4	-1.984	1	0.99999	1	18821	0	-1.984
NOP56	4	4.4826e-06	1.704e-05	0.004179	77	4	-1.8856	1	0.99999	1	18820	0	-1.8856
GART	4	4.7572e-06	1.8613e-05	0.004283	78	4	-2.2964	1	0.99999	1	18818	0	-2.2964
SAMM50	4	4.8114e-06	1.9137e-05	0.004283	79	4	-1.8831	1	0.99999	1	18817	0	-1.8831
LSM12	4	4.8605e-06	1.9137e-05	0.004283	80	4	-1.5633	1	0.99999	1	18816	0	-1.5633
LSM2	4	4.866e-06	1.9137e-05	0.004283	81	4	-2.0179	1	0.99999	1	18815	0	-2.0179
UBL5	4	4.9545e-06	1.9661e-05	0.004283	82	4	-1.923	1	0.99999	1	18814	0	-1.923
SFPQ	4	4.9712e-06	1.9661e-05	0.004283	83	4	-2.5182	1	0.99999	1	18813	0	-2.5182
IARS2	4	5.1808e-06	1.9661e-05	0.004283	84	4	-2.1707	0.99999	0.99999	1	18812	0	-2.1707
NPIPB3	4	5.2212e-06	1.9661e-05	0.004283	85	4	-1.5676	0.99999	0.99999	1	18811	0	-1.5676
TAF1C	4	5.3674e-06	2.0186e-05	0.004283	86	4	-1.4212	0.99999	0.99999	1	18810	0	-1.4212
TPI1	4	5.3733e-06	2.0186e-05	0.004283	87	4	-1.4774	0.99999	0.99999	1	18809	0	-1.4774
RPS10	4	5.5533e-06	2.0186e-05	0.004283	88	3	-3.0713	0.92776	0.92788	1	16501	0	-3.0713
DDX54	4	5.5927e-06	2.0186e-05	0.004283	89	4	-2.4207	0.99847	0.99845	1	18450	0	-2.4207
HMGCS1	4	5.7682e-06	2.1234e-05	0.004455	90	4	-1.6946	0.99999	0.99999	1	18808	0	-1.6946
ANAPC11	4	5.9384e-06	2.2807e-05	0.004681	91	4	-1.7535	0.99999	0.99999	1	18807	0	-1.7535
POLR3K	4	6.1059e-06	2.2807e-05	0.004681	92	4	-1.5792	0.99999	0.99999	1	18806	0	-1.5792
RPS17	4	6.1712e-06	2.3332e-05	0.004693	93	4	-1.7458	0.99999	0.99999	1	18805	0	-1.7458
DUT	4	6.3778e-06	2.3856e-05	0.004693	94	3	-2.7148	0.88208	0.88205	1	15646	0	-2.7148
ATP6V0B	4	6.3994e-06	2.3856e-05	0.004693	95	4	-2.664	0.99759	0.99757	1	18383	0	-2.664
TRMT112	4	6.4427e-06	2.3856e-05	0.004693	96	4	-2.5612	0.99264	0.99266	1	18135	0	-2.5612
MRPL57	4	6.6921e-06	2.6477e-05	0.005051	97	4	-2.1457	0.99999	0.99999	1	18804	0	-2.1457
GNB2	4	6.7201e-06	2.6477e-05	0.005051	98	4	-1.7093	0.99999	0.99999	1	18803	0	-1.7093
CDT1	4	6.7551e-06	2.6477e-05	0.005051	99	4	-2.2919	0.99999	0.99999	1	18802	0	-2.2919
PRMT1	4	6.8868e-06	2.7002e-05	0.005099	100	4	-2.5673	0.99711	0.99712	1	18341	0	-2.5673
ATP6V0C	4	7.0259e-06	2.7526e-05	0.005147	101	4	-1.8888	0.99999	0.99999	1	18801	0	-1.8888
DDX27	4	7.3644e-06	2.9099e-05	0.005387	102	4	-1.7252	0.99999	0.99999	1	18800	0	-1.7252
RPS26	4	7.5179e-06	2.9623e-05	0.005431	103	3	-2.9464	0.88247	0.88246	1	15652	0	-2.9464
DOLK	4	7.8086e-06	3.1196e-05	0.005665	104	4	-1.9062	0.99999	0.99999	1	18799	0	-1.9062
EIF2S3	4	7.9982e-06	3.172e-05	0.005705	105	4	-3.0705	0.99999	0.99999	1	18798	0	-3.0705
NOL10	4	8.2318e-06	3.2769e-05	0.005838	106	4	-2.5197	0.99999	0.99999	1	18797	0	-2.5197
RPS3A	4	8.3143e-06	3.3293e-05	0.005876	107	4	-2.1388	0.99669	0.99673	1	18312	0	-2.1388
LUC7L2	4	8.5708e-06	3.3818e-05	0.005913	108	4	-1.1614	0.99999	0.99999	1	18796	0	-1.1614
AFG3L2	4	8.7859e-06	3.4342e-05	0.005932	109	4	-1.8198	0.99957	0.99957	1	18583	0	-1.8198
PPP1R8	4	9.0593e-06	3.4866e-05	0.005932	110	4	-1.8031	0.99999	0.99999	1	18795	0	-1.8031
GPN1	4	9.1119e-06	3.4866e-05	0.005932	111	4	-1.2883	0.99999	0.99999	1	18794	0	-1.2883
RUVBL1	4	9.6967e-06	3.6964e-05	0.006232	112	4	-2.6965	0.99999	0.99999	1	18793	0	-2.6965
CHERP	4	1.0004e-05	3.8012e-05	0.006297	113	4	-1.6398	0.99999	0.99999	1	18792	0	-1.6398
LRRC37A	4	1.0042e-05	3.8012e-05	0.006297	114	3	-2.3245	0.78381	0.78586	1	13906	1	-2.3245
WASH1	4	1.0118e-05	3.8536e-05	0.006328	115	4	-2.7788	0.99999	0.99999	1	18791	0	-2.7788
TMEM189	4	1.0184e-05	3.9061e-05	0.006359	116	4	-1.1714	0.99999	0.99999	1	18790	0	-1.1714
EIF4E	4	1.088e-05	4.1158e-05	0.006643	117	4	-1.1742	0.99999	0.99999	1	18789	0	-1.1742
SBNO1	4	1.1123e-05	4.1682e-05	0.006671	118	4	-2.4556	0.99999	0.99999	1	18788	0	-2.4556
GBF1	4	1.1359e-05	4.378e-05	0.006947	119	4	-1.1742	0.99999	0.99998	1	18787	0	-1.1742
PSMD12	4	1.1962e-05	4.745e-05	0.007467	120	4	-2.0488	0.99999	0.99998	1	18786	0	-2.0488
MYC	4	1.2103e-05	4.9023e-05	0.007651	121	4	-2.9614	0.99999	0.99998	1	18785	0	-2.9614
DNAJC11	4	1.2532e-05	5.1644e-05	0.007865	122	4	-1.3684	0.99999	0.99998	1	18784	0	-1.3684
CHMP6	4	1.2543e-05	5.1644e-05	0.007865	123	4	-1.7738	0.99999	0.99998	1	18783	0	-1.7738
IMP3	4	1.2661e-05	5.1644e-05	0.007865	124	4	-2.5946	0.99949	0.99949	1	18567	0	-2.5946
RAD9A	4	1.2734e-05	5.2168e-05	0.007881	125	4	-2.1526	0.99999	0.99998	1	18782	0	-2.1526
EP300	4	1.3123e-05	5.3217e-05	0.007976	126	4	-1.2421	0.99999	0.99998	1	18781	0	-1.2421
SNRPD2	4	1.3414e-05	5.3741e-05	0.007991	127	4	-1.7938	0.99999	0.99998	1	18780	0	-1.7938
NPIPB6	4	1.3602e-05	5.4266e-05	0.008006	128	4	-2.7348	0.99481	0.99482	1	18224	0	-2.7348
KPNB1	4	1.4218e-05	5.5839e-05	0.008174	129	4	-2.6139	0.99998	0.99998	1	18769	0	-2.6139
POLD2	4	1.4665e-05	5.6625e-05	0.0082	130	4	-3.3391	0.99999	0.99998	1	18779	0	-3.3391
MARCH5	4	1.469e-05	5.6887e-05	0.0082	131	4	-1.4281	0.99999	0.99998	1	18778	0	-1.4281
CFLAR	4	1.4918e-05	5.7411e-05	0.008213	132	4	-2.4663	0.99999	0.99998	1	18777	0	-2.4663
HSPE1	4	1.529e-05	5.846e-05	0.0083	133	4	-2.6868	0.99998	0.99998	1	18776	0	-2.6868
RPL10	4	1.5882e-05	6.1082e-05	0.008608	134	4	-1.831	0.99998	0.99998	1	18775	0	-1.831
SPDYE2B	4	1.6096e-05	6.2655e-05	0.008764	135	4	-2.2332	0.99998	0.99998	1	18774	0	-2.2332
PWP2	4	1.6295e-05	6.4227e-05	0.008918	136	3	-2.0406	0.79548	0.79637	1	14091	1	-2.0406
CEP85	4	1.6559e-05	6.6325e-05	0.009142	137	4	-1.2569	0.99998	0.99998	1	18773	0	-1.2569
C10orf2	4	1.6878e-05	6.7373e-05	0.009219	138	4	-1.9339	0.99998	0.99998	1	18772	0	-1.9339
CCT7	4	1.7237e-05	6.8946e-05	0.009367	139	4	-2.5664	0.98984	0.9898	1	18041	0	-2.5664
HNRNPC	4	1.7447e-05	7.0519e-05	0.009512	140	3	-1.7916	0.93564	0.93568	1	16671	0	-1.7916
CENPW	4	1.8086e-05	7.2616e-05	0.009725	141	3	-2.2617	0.28568	0.42594	1	7826	1	-2.2617
TUBA1B	4	1.8317e-05	7.3665e-05	0.009728	142	4	-1.9458	0.99998	0.99998	1	18771	0	-1.9458
VARS	4	1.8442e-05	7.3665e-05	0.009728	143	4	-3.3033	0.99962	0.99962	1	18598	0	-3.3033
ZCRB1	4	2.0468e-05	8.153e-05	0.010692	144	4	-1.683	0.99998	0.99998	1	18770	0	-1.683
TAF6L	4	2.1822e-05	8.7821e-05	0.011437	145	4	-1.4327	0.99998	0.99998	1	18768	0	-1.4327
NAPA	4	2.2231e-05	9.0443e-05	0.011698	146	4	-1.4928	0.99998	0.99998	1	18767	0	-1.4928
PDCL	4	2.2897e-05	9.2016e-05	0.011821	147	3	-1.8831	0.94378	0.94386	1	16858	0	-1.8831
RPS9	4	2.4548e-05	9.7783e-05	0.012328	148	3	-2.6702	0.98318	0.98318	1	17840	0	-2.6702
FBL	4	2.4973e-05	9.9356e-05	0.012328	149	4	-1.9525	0.99418	0.99422	1	18197	0	-1.9525
PSMG3	4	2.508e-05	9.9356e-05	0.012328	150	4	-2.9093	0.99987	0.99988	1	18694	0	-2.9093
QARS	4	2.5133e-05	9.9356e-05	0.012328	151	3	-3.1056	0.40849	0.55394	1	9984	1	-3.1056
FAM96B	4	2.5241e-05	9.9356e-05	0.012328	152	3	-3.6172	0.68992	0.71408	1	12653	1	-3.6172
POLR2K	4	2.5332e-05	9.988e-05	0.012328	153	4	-1.0662	0.99997	0.99998	1	18766	0	-1.0662
RNF113A	4	2.5693e-05	0.00010145	0.012441	154	4	-1.5611	0.99997	0.99998	1	18765	0	-1.5611
RPS24	4	2.6001e-05	0.0001025	0.012488	155	4	-3.1732	0.99946	0.99947	1	18562	0	-3.1732
EIF2B5	4	2.6331e-05	0.00010407	0.012598	156	4	-2.7542	0.99994	0.99993	1	18726	0	-2.7542
BIRC5	4	2.6494e-05	0.00010565	0.01269	157	4	-2.5742	0.99749	0.99748	1	18374	0	-2.5742
MED8	4	2.6741e-05	0.00010617	0.01269	158	4	-1.0749	0.99997	0.99997	1	18764	0	-1.0749
SF3A1	4	2.77e-05	0.00010932	0.012908	159	4	-1.7565	0.99997	0.99997	1	18763	0	-1.7565
GNB1	4	2.7842e-05	0.00010984	0.012908	160	4	-1.5077	0.99997	0.99997	1	18762	0	-1.5077
CIAO1	4	2.8025e-05	0.00011089	0.012908	161	4	-2.0697	0.9999	0.9999	1	18708	0	-2.0697
RPL34	4	2.823e-05	0.00011141	0.012908	162	4	-1.8748	0.99997	0.99997	1	18761	0	-1.8748
KARS	4	2.8409e-05	0.00011141	0.012908	163	4	-1.69	0.99976	0.99976	1	18638	0	-1.69
RRM1	4	2.9715e-05	0.00011561	0.013291	164	4	-1.4778	0.99997	0.99997	1	18760	0	-1.4778
HARS	4	2.9801e-05	0.00011613	0.013291	165	4	-2.4717	0.99997	0.99997	1	18759	0	-2.4717
EIF3D	4	3.0469e-05	0.00011771	0.01339	166	4	-2.276	0.99997	0.99997	1	18758	0	-2.276
EIF4A1	4	3.1771e-05	0.00012243	0.013844	167	4	-2.4517	0.99997	0.99997	1	18756	0	-2.4517
SPDYE2	4	3.2041e-05	0.00012347	0.013879	168	4	-2.5544	0.99997	0.99997	1	18755	0	-2.5544
DIMT1	4	3.2884e-05	0.0001261	0.014007	169	4	-1.5821	0.99997	0.99997	1	18754	0	-1.5821
UQCRC1	4	3.2907e-05	0.0001261	0.014007	170	4	-0.9772	0.99997	0.99997	1	18753	0	-0.9772
CAPZB	4	3.337e-05	0.00012767	0.014099	171	4	-1.457	0.99997	0.99997	1	18752	0	-1.457
CTR9	4	3.3864e-05	0.00012924	0.014188	172	4	-1.6031	0.99972	0.99971	1	18624	0	-1.6031
SPATA5L1	4	3.4525e-05	0.00013291	0.014188	173	4	-1.5673	0.99997	0.99996	1	18751	0	-1.5673
ATP5D	4	3.4572e-05	0.00013291	0.014188	174	4	-1.4338	0.99997	0.99996	1	18750	0	-1.4338
MRPS18A	4	3.462e-05	0.00013344	0.014188	175	4	-1.6855	0.99997	0.99996	1	18749	0	-1.6855
SNRPF	4	3.4787e-05	0.00013344	0.014188	176	4	-2.3525	0.99952	0.99952	1	18575	0	-2.3525
SRSF1	4	3.4955e-05	0.00013396	0.014188	177	4	-3.0208	0.99966	0.99966	1	18613	0	-3.0208
RPL36	4	3.5149e-05	0.00013448	0.014188	178	4	-2.3016	0.99996	0.99996	1	18748	0	-2.3016
RPL27	4	3.5198e-05	0.00013448	0.014188	179	4	-1.7827	0.99996	0.99996	1	18747	0	-1.7827
ATF7IP	4	3.5591e-05	0.00013553	0.014219	180	4	-1.4408	0.9988	0.99878	1	18475	0	-1.4408
MCM2	4	3.6959e-05	0.0001413	0.014635	181	3	-1.0687	0.89832	0.89823	1	15937	0	-1.0687
SKIV2L2	4	3.7237e-05	0.00014182	0.014635	182	4	-2.6974	0.99242	0.99244	1	18124	0	-2.6974
PRAMEF15	4	3.7516e-05	0.00014182	0.014635	183	3	-1.5072	0.9823	0.9823	1	17820	0	-1.5072
LIN9	4	3.822e-05	0.00014445	0.014798	184	4	-1.2926	0.99996	0.99996	1	18746	0	-1.2926
PPP1R10	4	3.8272e-05	0.00014497	0.014798	185	4	-1.7667	0.99996	0.99996	1	18745	0	-1.7667
RPS29	4	3.8481e-05	0.00014654	0.014878	186	3	-2.3174	0.49624	0.60675	1	10850	1	-2.3174
DUX4	4	3.9871e-05	0.00015284	0.015434	187	3	-3.0862	0.90189	0.90186	1	16004	0	-3.0862
PHB2	4	4.1735e-05	0.0001607	0.015972	188	4	-2.8865	0.99996	0.99996	1	18744	0	-2.8865
NSL1	4	4.187e-05	0.0001607	0.015972	189	3	-2.3292	0.98467	0.98464	1	17882	0	-2.3292
MCM5	4	4.2247e-05	0.00016227	0.016031	190	3	-1.7775	0.92808	0.92822	1	16506	0	-1.7775
GOLGA6L10	4	4.2428e-05	0.00016332	0.016031	191	4	-1.7438	0.99996	0.99996	1	18743	0	-1.7438
RPL37	4	4.255e-05	0.00016385	0.016031	192	4	-2.7259	0.99989	0.99989	1	18700	0	-2.7259
PGAM1	4	4.3439e-05	0.00016647	0.016172	193	4	-0.95352	0.99996	0.99996	1	18742	0	-0.95352
MED19	4	4.3546e-05	0.00016699	0.016172	194	3	-2.6114	0.15248	0.28668	0.967085	5589	1	-2.6114
C19orf52	4	4.502e-05	0.00017197	0.016569	195	4	-2.3363	0.99995	0.99995	1	18741	0	-2.3363
TXN	4	4.7365e-05	0.00018324	0.017565	196	4	-1.4704	0.99995	0.99995	1	18740	0	-1.4704
BUD31	4	4.7521e-05	0.00018429	0.017577	197	4	-1.992	0.99904	0.99903	1	18495	0	-1.992
DHX33	4	4.8179e-05	0.00018587	0.017638	198	3	-2.1231	0.81203	0.81201	1	14367	1	-2.1231
SLC12A9	4	4.8556e-05	0.00018744	0.017698	199	4	-0.94999	0.99995	0.99995	1	18739	0	-0.94999
DDTL	4	4.8741e-05	0.00018849	0.017708	200	4	-1.2881	0.99995	0.99995	1	18738	0	-1.2881
QRSL1	4	4.9456e-05	0.00019163	0.017915	201	4	-1.2202	0.99995	0.99995	1	18737	0	-1.2202
TIMELESS	4	4.9832e-05	0.00019373	0.018022	202	4	-2.2702	0.99995	0.99995	1	18736	0	-2.2702
PSMD3	4	5.0018e-05	0.00019478	0.01803	203	4	-2.1364	0.99621	0.99622	1	18283	0	-2.1364
XPO1	3	5.0458e-05	0.00015598	0.015668	204	3	-2.75	0.99995	0.99995	1	18735	0	-2.75
U2AF1	4	5.1557e-05	0.00020107	0.018432	205	4	-2.0514	0.99982	0.99982	1	18659	0	-2.0514
STT3B	4	5.168e-05	0.00020107	0.018432	206	4	-1.335	0.99995	0.99995	1	18734	0	-1.335
TCEB2	4	5.2425e-05	0.00020527	0.018683	207	3	-2.714	0.94044	0.94048	1	16781	0	-2.714
SRSF2	4	5.2775e-05	0.00020579	0.018683	208	4	-3.327	0.99769	0.99769	1	18391	0	-3.327
MDM2	4	5.3038e-05	0.00020736	0.018736	209	4	-1.966	0.99964	0.99964	1	18605	0	-1.966
COPE	4	5.3545e-05	0.00020946	0.018835	210	4	-2.2863	0.99995	0.99994	1	18733	0	-2.2863
TERF2	4	5.717e-05	0.00022519	0.020154	211	4	-2.3252	0.99951	0.99951	1	18573	0	-2.3252
RPL7	4	5.7603e-05	0.00022781	0.020292	212	4	-1.393	0.99994	0.99994	1	18732	0	-1.393
DAD1	4	5.8732e-05	0.00023201	0.020569	213	4	-2.8125	0.99994	0.99994	1	18731	0	-2.8125
NOP16	4	5.9627e-05	0.00023568	0.020797	214	3	-1.4426	0.32511	0.46695	1	8525	1	-1.4426
EIF2AK4	4	6.1591e-05	0.00024511	0.021529	215	4	-1.1045	0.99994	0.99994	1	18730	0	-1.1045
GOLGA8K	4	6.2592e-05	0.0002514	0.021924	216	4	-1.7693	0.99994	0.99994	1	18729	0	-1.7693
WEE1	4	6.2966e-05	0.00025193	0.021924	217	4	-1.7156	0.99994	0.99993	1	18728	0	-1.7156
KIF11	4	6.3756e-05	0.00025455	0.02205	218	4	-1.7394	0.99994	0.99993	1	18727	0	-1.7394
EIF4A3	4	6.559e-05	0.00026294	0.022602	219	4	-3.1839	0.99993	0.99993	1	18725	0	-3.1839
NAA30	4	6.6288e-05	0.00026399	0.022602	220	4	-1.0326	0.99993	0.99993	1	18724	0	-1.0326
EIF4G1	4	6.6634e-05	0.00026451	0.022602	221	4	-1.9247	0.99702	0.99705	1	18333	0	-1.9247
GTF3C3	4	6.7938e-05	0.00027238	0.023169	222	4	-0.85857	0.99993	0.99993	1	18723	0	-0.85857
HAUS5	4	6.9435e-05	0.0002771	0.023404	223	4	-1.118	0.99938	0.99939	1	18547	0	-1.118
FDX1L	4	7.0068e-05	0.00027762	0.023404	224	4	-2.4584	0.99825	0.99824	1	18431	0	-2.4584
EIF2B4	4	7.0705e-05	0.00027919	0.023432	225	3	-1.721	0.9857	0.98567	1	17912	0	-1.721
MTHFD1	4	7.1345e-05	0.00028129	0.023504	226	4	-1.4489	0.99957	0.99957	1	18584	0	-1.4489
USP39	4	7.2855e-05	0.00028811	0.023967	227	3	-1.897	0.9267	0.92684	1	16477	0	-1.897
SF3B5	4	7.696e-05	0.00030541	0.025295	228	4	-2.3973	0.99992	0.99992	1	18722	0	-2.3973
TRRAP	4	7.8077e-05	0.0003096	0.025506	229	4	-1.7166	0.99987	0.99988	1	18689	0	-1.7166
ORAOV1	4	7.8628e-05	0.00031065	0.025506	230	4	-1.8941	0.99992	0.99992	1	18721	0	-1.8941
MEN1	4	7.9561e-05	0.00031432	0.025695	231	4	-1.2942	0.99992	0.99992	1	18720	0	-1.2942
RPL5	4	8.0953e-05	0.00032219	0.025948	232	3	-2.2282	0.66248	0.69626	1	12349	1	-2.2282
LSM4	4	8.118e-05	0.00032271	0.025948	233	4	-1.8556	0.99992	0.99992	1	18719	0	-1.8556
PHAX	4	8.1544e-05	0.00032323	0.025948	234	4	-1.6752	0.99992	0.99992	1	18718	0	-1.6752
RPS15A	4	8.1635e-05	0.00032376	0.025948	235	4	-1.2607	0.99992	0.99992	1	18717	0	-1.2607
ZNHIT2	4	8.1817e-05	0.00032428	0.025948	236	4	-1.904	0.99992	0.99992	1	18716	0	-1.904
GNG5	4	8.3609e-05	0.00032848	0.026173	237	4	-1.4889	0.99992	0.99992	1	18715	0	-1.4889
SNIP1	4	8.4137e-05	0.0003311	0.026271	238	3	-1.0693	0.72151	0.73604	1	13019	1	-1.0693
GEMIN8	4	8.5055e-05	0.00033424	0.026382	239	4	-1	0.99991	0.99992	1	18714	0	-1
AQR	4	8.5195e-05	0.00033529	0.026382	240	4	-1.2857	0.99991	0.99992	1	18713	0	-1.2857
SLC7A6OS	4	8.7402e-05	0.00034054	0.026683	241	4	-1.1822	0.99839	0.99837	1	18441	0	-1.1822
KTI12	4	8.8484e-05	0.00034368	0.026819	242	4	-1.9798	0.99991	0.99991	1	18712	0	-1.9798
RPL24	4	9.1074e-05	0.00035522	0.027605	243	4	-1.6333	0.99991	0.99991	1	18711	0	-1.6333
SMARCD1	4	9.1759e-05	0.00035836	0.027735	244	3	-1.5695	0.93854	0.93854	1	16735	0	-1.5695
EIF2S2	4	9.3029e-05	0.00036256	0.027945	245	3	-1.7136	0.78788	0.78946	1	13973	1	-1.7136
PRMT5	4	9.3946e-05	0.0003678	0.02812	246	3	-1.7167	0.80161	0.80204	1	14201	1	-1.7167
CGB	4	9.3973e-05	0.0003678	0.02812	247	4	-0.91937	0.99991	0.99991	1	18710	0	-0.91937
RPE	4	9.72e-05	0.00038458	0.029284	248	4	-1.2606	0.9999	0.9999	1	18709	0	-1.2606
IPPK	4	9.9157e-05	0.0003893	0.029524	249	4	-1.717	0.99989	0.9999	1	18701	0	-1.717
GLRX5	4	9.9767e-05	0.00039139	0.029564	250	4	-0.96426	0.9999	0.9999	1	18707	0	-0.96426
EMC6	4	0.00010126	0.00039769	0.029684	251	4	-1.6048	0.9999	0.9999	1	18706	0	-1.6048
PIK3CG	4	0.00010225	0.00040083	0.029684	252	4	-2.267	0.99761	0.9976	1	18385	0	-2.267
GOLGA6C	4	0.00010266	0.00040136	0.029684	253	4	-1.5601	0.99658	0.99662	1	18306	0	-1.5601
RPS27A	4	0.0001032	0.0004024	0.029684	254	4	-2.2993	0.99989	0.99989	1	18699	0	-2.2993
GNL3L	4	0.00010368	0.00040293	0.029684	255	4	-0.67478	0.9999	0.9999	1	18704	0	-0.67478
COASY	4	0.00010416	0.00040345	0.029684	256	4	-1.5426	0.99482	0.99483	1	18225	0	-1.5426
EARS2	4	0.00010458	0.00040503	0.029684	257	4	-1.7719	0.99652	0.99656	1	18299	0	-1.7719
RPRD1B	4	0.00010472	0.00040555	0.029684	258	4	-1.3564	0.9999	0.9999	1	18703	0	-1.3564
RBFA	4	0.00010516	0.00040712	0.029684	259	4	-1.0665	0.99989	0.9999	1	18702	0	-1.0665
SMC2	4	0.00010736	0.00041761	0.030331	260	3	-2.335	0.96139	0.96136	1	17263	0	-2.335
XPO5	4	0.00011005	0.00042652	0.03086	261	4	-1.5308	0.99449	0.99452	1	18212	0	-1.5308
POLR2I	4	0.00011148	0.00043177	0.03112	262	3	-2.4603	0.93057	0.93068	1	16564	0	-2.4603
MRPS34	4	0.0001125	0.00043491	0.031228	263	4	-1.4003	0.99989	0.99989	1	18698	0	-1.4003
ABCB7	4	0.00011296	0.00043753	0.031291	264	3	-1.6619	0.56961	0.64273	1	11446	1	-1.6619
EIF3CL	4	0.00011322	0.00043911	0.031291	265	4	-1.3305	0.99967	0.99966	1	18615	0	-1.3305
MAT2A	4	0.00011394	0.0004412	0.031316	266	4	-1.8722	0.9993	0.99932	1	18538	0	-1.8722
RPS27	4	0.00011438	0.00044278	0.031316	267	4	-2.6367	0.99981	0.99981	1	18657	0	-2.6367
ATP6V0D1	4	0.00011571	0.00044697	0.031495	268	3	-2.1665	0.44079	0.58182	1	10472	1	-2.1665
GFM1	4	0.00011733	0.00045326	0.031775	269	3	-1.2901	0.8409	0.84074	1	14897	0	-1.2901
SMNDC1	4	0.00011781	0.00045431	0.031775	270	2	-1.0044	0.12898	0.26195	0.946775	5221	1	-1.0044
RPL26	4	0.00011931	0.0004648	0.032388	271	4	-1.5109	0.99988	0.99989	1	18697	0	-1.5109
DHFR	4	0.00012162	0.00047371	0.032888	272	4	-1.3466	0.99988	0.99989	1	18696	0	-1.3466
EEF2	4	0.00012247	0.00047633	0.032949	273	3	-1.6858	0.65419	0.69115	1	12260	1	-1.6858
POP1	4	0.00012339	0.00047895	0.033009	274	3	-1.2613	0.71898	0.73422	1	12982	1	-1.2613
PRPF38A	4	0.00012478	0.0004842	0.033201	275	4	-2.5472	0.9974	0.99739	1	18365	0	-2.5472
CENPM	4	0.00012516	0.00048524	0.033201	276	4	-1.9541	0.99987	0.99988	1	18695	0	-1.9541
RPL32	4	0.00012712	0.00049521	0.03376	277	3	-2.0049	0.41284	0.55855	1	10066	1	-2.0049
WDR18	4	0.00012807	0.00049835	0.033852	278	4	-1.6614	0.99987	0.99988	1	18693	0	-1.6614
OR4F17	4	0.00012903	0.00050307	0.033984	279	4	-1.094	0.99987	0.99988	1	18692	0	-1.094
C19orf43	4	0.00012915	0.00050412	0.033984	280	4	-0.91452	0.99987	0.99988	1	18691	0	-0.91452
HSD17B10	4	0.0001298	0.00050569	0.033984	281	4	-2.2223	0.99962	0.99962	1	18597	0	-2.2223
POP5	4	0.00013246	0.0005167	0.034531	282	2	-0.19226	0.83232	0.83228	1	14737	0	-0.19226
RPS4X	4	0.00013297	0.0005188	0.034531	283	4	-2.1103	0.99982	0.99983	1	18661	0	-2.1103
PCNA	4	0.00013301	0.00051932	0.034531	284	4	-2.5487	0.99734	0.99734	1	18361	0	-2.5487
RAD21	4	0.00013333	0.00052142	0.034549	285	3	-2.1341	0.51584	0.61592	1	10999	1	-2.1341
POLR3A	4	0.00013447	0.00052981	0.034982	286	3	-2.4914	0.52047	0.61817	1	11038	1	-2.4914
THOC5	4	0.0001366	0.00053872	0.035183	287	4	-1.6222	0.99984	0.99984	1	18668	0	-1.6222
PELP1	4	0.00013693	0.00053925	0.035183	288	3	-1.3977	0.8398	0.83968	1	14878	0	-1.3977
MRPS23	4	0.00013726	0.00053925	0.035183	289	3	-1.5793	0.85479	0.85468	1	15148	0	-1.5793
AP2S1	4	0.00013737	0.0005403	0.035183	290	4	-0.88817	0.99986	0.99987	1	18688	0	-0.88817
RPL35A	4	0.00013809	0.00054292	0.035232	291	4	-1.8116	0.99977	0.99977	1	18640	0	-1.8116
NUDT4	4	0.00013987	0.00054711	0.035382	292	4	-1.333	0.99986	0.99986	1	18687	0	-1.333
EXOSC9	4	0.00014028	0.00055026	0.035464	293	4	-1.316	0.99986	0.99986	1	18686	0	-1.316
MARS	4	0.0001409	0.00055288	0.035512	294	4	-2.1641	0.99986	0.99986	1	18685	0	-2.1641
IPMK	4	0.00014244	0.00056075	0.035895	295	4	-1.6315	0.99677	0.9968	1	18318	0	-1.6315
NUP155	4	0.00014359	0.00056599	0.035987	296	3	-1.8651	0.25196	0.39074	1	7246	1	-1.8651
ALG1	4	0.00014366	0.00056599	0.035987	297	4	-1.3127	0.99986	0.99986	1	18684	0	-1.3127
TUT1	4	0.00014484	0.00057071	0.036165	298	4	-1.4668	0.99986	0.99986	1	18683	0	-1.4668
ARFRP1	4	0.00014547	0.0005728	0.036177	299	4	-1.1959	0.99985	0.99986	1	18682	0	-1.1959
C1orf109	4	0.00014569	0.0005749	0.036188	300	4	-1.0714	0.99985	0.99986	1	18681	0	-1.0714
TRAPPC4	4	0.0001471	0.00057857	0.036298	301	4	-1.296	0.99985	0.99986	1	18680	0	-1.296
LSM7	4	0.00015096	0.00059115	0.036731	302	4	-1.0851	0.99985	0.99985	1	18679	0	-1.0851
MCM6	4	0.00015106	0.00059168	0.036731	303	3	-1.6801	0.26702	0.40649	1	7505	1	-1.6801
CCT4	4	0.00015124	0.0005922	0.036731	304	4	-1.3834	0.99985	0.99985	1	18678	0	-1.3834
BANF1	4	0.00015142	0.00059325	0.036731	305	2	-0.92067	0.0040474	0.014152	0.589939	452	2	-0.92067
RPL21	4	0.00015336	0.00059902	0.036777	306	3	-1.298	0.87869	0.87868	1	15575	0	-1.298
DDX10	4	0.00015423	0.00060164	0.036777	307	4	-1.5372	0.99985	0.99985	1	18677	0	-1.5372
CBWD5	4	0.00015474	0.00060269	0.036777	308	4	-1.5189	0.99985	0.99985	1	18676	0	-1.5189
SNRPD1	4	0.00015497	0.00060321	0.036777	309	3	-1.8543	0.61902	0.67015	1	11885	1	-1.8543
MRPL17	4	0.00015511	0.00060374	0.036777	310	4	-0.93963	0.99984	0.99985	1	18675	0	-0.93963
RPN2	4	0.00015592	0.00060688	0.036827	311	4	-1.818	0.99984	0.99985	1	18674	0	-1.818
TUBB	4	0.00015651	0.00060846	0.036827	312	4	-2.2723	0.99984	0.99985	1	18673	0	-2.2723
UBA52	4	0.00015783	0.00061318	0.036994	313	3	-2.4121	0.82554	0.82548	1	14601	0	-2.4121
CCDC84	4	0.00015875	0.00061685	0.037097	314	4	-1.0544	0.99984	0.99985	1	18672	0	-1.0544
AHCTF1	4	0.00016003	0.00062156	0.037262	315	4	-0.90018	0.99984	0.99985	1	18671	0	-0.90018
NARFL	4	0.00016207	0.00062628	0.037355	316	4	-1.5249	0.99984	0.99984	1	18670	0	-1.5249
OGT	4	0.0001623	0.00062707	0.037355	317	4	-1.2975	0.99984	0.99984	1	18669	0	-1.2975
NBPF4	4	0.00016501	0.00063729	0.03767	318	3	-1.1142	0.9837	0.98368	1	17855	0	-1.1142
RPTOR	4	0.00016522	0.00063782	0.03767	319	4	-1.0932	0.99983	0.99984	1	18667	0	-1.0932
ATP5H	4	0.00016538	0.00063834	0.03767	320	4	-2.3153	0.99532	0.99532	1	18241	0	-2.3153
SLC25A19	4	0.00016716	0.00064201	0.037682	321	4	-0.68071	0.99983	0.99984	1	18666	0	-0.68071
RPS14	4	0.00016769	0.00064254	0.037682	322	4	-2.4733	0.98758	0.98757	1	17977	0	-2.4733
SDHD	4	0.00016896	0.00064463	0.037688	323	4	-0.9389	0.99983	0.99984	1	18665	0	-0.9389
CYCS	4	0.00016972	0.00064883	0.037791	324	3	-1.2631	0.5109	0.61355	1	10953	1	-1.2631
CDCA8	4	0.00017029	0.0006504	0.037791	325	3	-1.4655	0.29315	0.43369	1	7961	1	-1.4655
CMPK1	4	0.00017124	0.00065407	0.037888	326	4	-1.4667	0.99983	0.99983	1	18664	0	-1.4667
MRPS26	4	0.00017212	0.00065827	0.038014	327	4	-1.0032	0.99983	0.99983	1	18663	0	-1.0032
TAZ	4	0.00017335	0.00066298	0.03817	328	4	-1.8935	0.99961	0.99961	1	18594	0	-1.8935
EXOSC6	4	0.0001747	0.00066823	0.038355	329	3	-1.5473	0.48622	0.60211	1	10774	1	-1.5473
ECD	4	0.00017541	0.00067137	0.038419	330	4	-1.755	0.99982	0.99983	1	18662	0	-1.755
SMG1	4	0.00017645	0.00067504	0.038433	331	4	-2.5167	0.99946	0.99947	1	18563	0	-2.5167
RPS25	4	0.00017785	0.00067819	0.038433	332	3	-2.2619	0.72981	0.7421	1	13124	1	-2.2619
RPL18A	4	0.00017833	0.00067871	0.038433	333	4	-1.7194	0.99982	0.99983	1	18660	0	-1.7194
RPL35	4	0.0001788	0.00067976	0.038433	334	4	-2.3517	0.99551	0.99549	1	18249	0	-2.3517
HSCB	4	0.00018416	0.00069602	0.039147	335	4	-2.0138	0.99927	0.99928	1	18531	0	-2.0138
CFL1	4	0.00018436	0.00069654	0.039147	336	3	-1.0741	0.9566	0.9566	1	17143	0	-1.0741
NRF1	4	0.00018556	0.00069864	0.039149	337	3	-2.1563	0.39169	0.53639	1	9708	1	-2.1563
NMT1	4	0.00018657	0.00070126	0.039179	338	3	-2.8222	0.76621	0.7707	1	13647	1	-2.8222
RPS2	4	0.00018799	0.0007065	0.039269	339	4	-2.2176	0.99529	0.99529	1	18240	0	-2.2176
HIST1H2AI	4	0.00018826	0.00070703	0.039269	340	4	-1.6529	0.99981	0.99981	1	18658	0	-1.6529
IL6ST	4	0.0001904	0.00071384	0.039531	341	4	-1.2563	0.99981	0.99981	1	18656	0	-1.2563
GNB2L1	4	0.00019147	0.00071856	0.039676	342	4	-2.3777	0.99894	0.99893	1	18489	0	-2.3777
FAM25C	4	0.00019308	0.00072276	0.039761	343	4	-1.5046	0.99981	0.99981	1	18655	0	-1.5046
MYBBP1A	4	0.00019377	0.00072538	0.039761	344	4	-1.5492	0.99981	0.9998	1	18654	0	-1.5492
GPN2	4	0.00019421	0.00072695	0.039761	345	4	-1.9769	0.99981	0.9998	1	18653	0	-1.9769
RPS5	4	0.00019455	0.00072852	0.039761	346	4	-1.1629	0.99714	0.99714	1	18344	0	-1.1629
SRP14	4	0.00019569	0.00073586	0.039957	347	4	-1.2703	0.9998	0.9998	1	18652	0	-1.2703
SNRPC	4	0.00019596	0.00073639	0.039957	348	4	-1.2131	0.9998	0.9998	1	18651	0	-1.2131
SLC35B1	4	0.00019745	0.00074215	0.039957	349	4	-1.1486	0.9998	0.9998	1	18650	0	-1.1486
PES1	4	0.00019791	0.00074268	0.039957	350	3	-1.3903	0.9743	0.97442	1	17600	0	-1.3903
ALG13	4	0.00019812	0.00074268	0.039957	351	3	-1.7035	0.96538	0.9654	1	17365	0	-1.7035
SRRM2	4	0.00020172	0.00075893	0.040715	352	4	-1.0127	0.9998	0.9998	1	18649	0	-1.0127
SRSF7	4	0.00020325	0.0007668	0.040942	353	4	-1.8534	0.9998	0.9998	1	18648	0	-1.8534
TIMM10	4	0.00020407	0.00076942	0.040942	354	4	-2.1743	0.9948	0.99481	1	18223	0	-2.1743
DGCR8	4	0.00020493	0.00077152	0.040942	355	4	-1.306	0.99783	0.99783	1	18399	0	-1.306
WDR20	4	0.00020515	0.00077309	0.040942	356	4	-1.3494	0.99979	0.9998	1	18647	0	-1.3494
MAPK14	4	0.00020558	0.00077414	0.040942	357	4	-0.97102	0.99966	0.99965	1	18608	0	-0.97102
PPP1R15B	4	0.00020606	0.00077728	0.040942	358	4	-1.8493	0.99979	0.99979	1	18646	0	-1.8493
PREB	4	0.0002064	0.00077833	0.040942	359	4	-2.1711	0.99943	0.99944	1	18554	0	-2.1711
CHCHD1	4	0.0002078	0.00078148	0.040993	360	4	-0.82765	0.99979	0.99979	1	18645	0	-0.82765
CDK6	4	0.00021029	0.00079039	0.041346	361	4	-1.7963	0.99979	0.99979	1	18644	0	-1.7963
RPL9	4	0.00021481	0.00080874	0.042154	362	3	-2.4266	0.89851	0.8984	1	15942	0	-2.4266
DHX37	4	0.00021524	0.00081031	0.042154	363	4	-1.6736	0.99978	0.99979	1	18643	0	-1.6736
C2orf27B	4	0.00021955	0.00082395	0.042746	364	3	-1.6821	0.35295	0.49606	1	9050	1	-1.6821
TUBG1	4	0.00022219	0.00083443	0.043044	365	4	-1.266	0.99978	0.99978	1	18642	0	-1.266
DDX20	4	0.00022285	0.00083548	0.043044	366	3	-1.5716	0.4257	0.57198	1	10314	1	-1.5716
NPIPA2	4	0.00022338	0.00083653	0.043044	367	3	-1.8196	0.19251	0.32876	0.98955	6269	1	-1.8196
CLTC	4	0.00022435	0.0008402	0.043052	368	3	-2.1026	0.98042	0.98049	1	17774	0	-2.1026
TUFM	4	0.00022452	0.00084125	0.043052	369	4	-1.0339	0.99978	0.99978	1	18641	0	-1.0339
THOC3	4	0.00022628	0.00084649	0.043203	370	4	-2.1749	0.9976	0.99758	1	18384	0	-2.1749
GFER	4	0.00022974	0.00086065	0.043807	371	4	-1.9258	0.9973	0.99729	1	18356	0	-1.9258
RPS3	4	0.00023213	0.00086851	0.044089	372	2	-1.4057	0.58887	0.65315	1	11620	1	-1.4057
ATP1B3	4	0.00023559	0.00087795	0.044448	373	3	-1.575	0.86538	0.8653	1	15342	0	-1.575
LRRC37A3	4	0.00023842	0.00088424	0.044647	374	4	-1.1652	0.99931	0.99933	1	18539	0	-1.1652
CDC45	4	0.00023938	0.00089001	0.044712	375	3	-1.5829	0.93374	0.93379	1	16636	0	-1.5829
PMF1-BGLAP	4	0.00023966	0.00089106	0.044712	376	4	-1.119	0.99976	0.99976	1	18639	0	-1.119
RPL12	4	0.00024004	0.00089263	0.044712	377	4	-2.4063	0.99704	0.99707	1	18335	0	-2.4063
LOC100144595	4	0.00024203	0.0009005	0.044987	378	3	-2.3556	0.68678	0.71203	1	12618	1	-2.3556
PELI3	4	0.00024377	0.00090574	0.045129	379	4	-0.81503	0.99976	0.99976	1	18637	0	-0.81503
RFC2	4	0.00024646	0.00091203	0.045323	380	4	-0.76252	0.99975	0.99976	1	18636	0	-0.76252
ISY1	4	0.0002473	0.00091622	0.045412	381	4	-1.4457	0.99975	0.99976	1	18635	0	-1.4457
C7orf43	4	0.00024824	0.00091937	0.045449	382	4	-1.041	0.99975	0.99975	1	18634	0	-1.041
POLG2	4	0.00025108	0.00093038	0.045873	383	4	-1.5387	0.99975	0.99975	1	18633	0	-1.5387
CLSPN	4	0.0002531	0.00094139	0.046295	384	4	-1.352	0.99975	0.99975	1	18632	0	-1.352
SRP54	4	0.00025945	0.00096341	0.047255	385	3	-1.6877	0.050085	0.12067	0.858401	2653	1	-1.6877
MRPS12	4	0.00026122	0.00096918	0.047414	386	4	-1.1752	0.99961	0.9996	1	18591	0	-1.1752
PRPF8	4	0.00026346	0.00097704	0.047676	387	4	-2.561	0.99974	0.99973	1	18630	0	-2.561
MRPL41	4	0.00026477	0.00098176	0.047782	388	4	-1.3693	0.99915	0.99914	1	18508	0	-1.3693
LRP10	4	0.00026643	0.00098753	0.047796	389	4	-0.95022	0.99973	0.99973	1	18629	0	-0.95022
KEAP1	4	0.00026665	0.00098805	0.047796	390	3	-0.74718	0.67495	0.70423	1	12492	1	-0.74718
TTI1	4	0.00026732	0.00098963	0.047796	391	3	-1.2254	0.91207	0.91204	1	16194	0	-1.2254
HUWE1	4	0.00027196	0.0010038	0.048356	392	4	-1.307	0.99901	0.999	1	18493	0	-1.307
THRAP3	4	0.00027606	0.001019	0.048791	393	4	-0.83383	0.99972	0.99972	1	18628	0	-0.83383
EIF2S1	4	0.00027618	0.001019	0.048791	394	4	-1.7116	0.99972	0.99972	1	18627	0	-1.7116
WNK1	4	0.00027692	0.0010206	0.048791	395	4	-1.8163	0.98821	0.98821	1	17995	0	-1.8163
PAFAH1B1	4	0.0002788	0.0010269	0.048967	396	4	-1.2509	0.99972	0.99972	1	18626	0	-1.2509
NFS1	4	0.00028061	0.0010337	0.049045	397	3	-2.1758	0.73826	0.74838	1	13232	1	-2.1758
AKIRIN2	4	0.00028063	0.0010337	0.049045	398	4	-2.1316	0.99972	0.99972	1	18625	0	-2.1316
RPL30	4	0.00028263	0.00104	0.04922	399	3	-1.6732	0.94974	0.94978	1	16998	0	-1.6732
MED11	4	0.00028589	0.0010494	0.049542	400	3	-2.5196	0.54054	0.62796	1	11198	1	-2.5196
CCT2	4	0.00028911	0.0010641	0.05011	401	4	-1.7109	0.99971	0.99971	1	18623	0	-1.7109
OGDH	4	0.0002914	0.0010714	0.050328	402	1	-0.17193	0.91647	0.91652	1	16279	0	-0.17193
MAU2	4	0.00029187	0.001074	0.050328	403	3	-1.4962	0.66199	0.69596	1	12340	1	-1.4962
ELL	4	0.0002942	0.001084	0.050669	404	4	-1.4113	0.99971	0.9997	1	18621	0	-1.4113
CDC6	4	0.00029733	0.001094	0.051008	405	3	-1.4322	0.41621	0.56206	1	10129	1	-1.4322
SLC6A17	4	0.00029926	0.0010992	0.051025	406	3	-0.97718	0.88667	0.88662	1	15727	0	-0.97718
MLST8	4	0.00029995	0.0010997	0.051025	407	4	-1.6574	0.9997	0.9997	1	18620	0	-1.6574
SRSF10	4	0.00030201	0.0011097	0.051361	408	4	-0.99019	0.9997	0.9997	1	18619	0	-0.99019
ZNF236	4	0.00031047	0.0011432	0.052785	409	4	-1.1878	0.99969	0.99969	1	18618	0	-1.1878
EFTUD2	4	0.0003176	0.0011689	0.05384	410	4	-1.4002	0.99968	0.99968	1	18617	0	-1.4002
EIF3B	4	0.00031872	0.0011726	0.053877	411	4	-1.8953	0.99929	0.9993	1	18535	0	-1.8953
RPS12	4	0.00032364	0.0011889	0.054348	412	3	-1.4593	0.81945	0.81941	1	14485	0	-1.4593
N6AMT1	4	0.00032451	0.001191	0.054348	413	4	-1.7252	0.99872	0.9987	1	18469	0	-1.7252
PTCD3	4	0.00032459	0.0011915	0.054348	414	4	-0.72431	0.99968	0.99967	1	18616	0	-0.72431
EIF5	4	0.00032802	0.0012046	0.054705	415	3	-2.3345	0.91343	0.91344	1	16217	0	-2.3345
SIN3A	4	0.00032806	0.0012051	0.054705	416	4	-1.0494	0.99967	0.99966	1	18614	0	-1.0494
VHL	4	0.00032919	0.0012109	0.054823	417	3	-1.9461	0.80082	0.80131	1	14187	1	-1.9461
DDX46	4	0.00033037	0.0012135	0.054823	418	3	-1.8285	0.058368	0.13689	0.880378	2932	1	-1.8285
RAN	4	0.00033126	0.0012177	0.054881	419	3	-2.3072	0.74978	0.75739	1	13413	1	-2.3072
MRPS16	4	0.0003372	0.0012334	0.055457	420	4	-1.2454	0.99944	0.99945	1	18558	0	-1.2454
BIN1	4	0.00033971	0.0012455	0.055805	421	4	-0.74341	0.99966	0.99966	1	18612	0	-0.74341
TOP2A	4	0.00034037	0.0012471	0.055805	422	4	-1.6349	0.99966	0.99966	1	18611	0	-1.6349
ELAVL1	4	0.00034183	0.0012518	0.055883	423	4	-0.99124	0.99966	0.99965	1	18610	0	-0.99124
RBM15	4	0.0003433	0.001256	0.055938	424	4	-1.0825	0.99966	0.99965	1	18609	0	-1.0825
SRF	4	0.00034524	0.0012617	0.055978	425	4	-0.93843	0.99965	0.99965	1	18607	0	-0.93843
SMC4	4	0.00034593	0.0012628	0.055978	426	3	-1.2958	0.63012	0.67663	1	12005	1	-1.2958
PFDN2	4	0.00034867	0.001268	0.056079	427	4	-1.3689	0.99949	0.99949	1	18569	0	-1.3689
NELFCD	4	0.00035082	0.0012796	0.056371	428	4	-1.9629	0.99924	0.99924	1	18524	0	-1.9629
SNRNP40	4	0.00035112	0.0012806	0.056371	429	3	-1.446	0.94633	0.94636	1	16911	0	-1.446
SUPT4H1	4	0.00035262	0.0012853	0.056447	430	4	-1.6393	0.99965	0.99964	1	18606	0	-1.6393
DPM2	4	0.00035605	0.001299	0.056913	431	3	-1.2602	0.71163	0.72886	1	12901	1	-1.2602
DHPS	4	0.00035885	0.0013079	0.057108	432	4	-1.785	0.99046	0.99045	1	18065	0	-1.785
GINS3	4	0.00035947	0.0013095	0.057108	433	3	-1.4959	0.5578	0.63667	1	11343	1	-1.4959
GARS	4	0.0003624	0.0013257	0.057574	434	4	-1.4723	0.99964	0.99963	1	18604	0	-1.4723
HIST1H4J	4	0.00036254	0.0013262	0.057574	435	4	-1.3373	0.99964	0.99963	1	18603	0	-1.3373
MVD	4	0.00036454	0.0013341	0.057782	436	2	-1.3175	0.11765	0.24605	0.941336	4927	1	-1.3175
RFC3	4	0.00036631	0.001343	0.058035	437	4	-1.12	0.99963	0.99963	1	18602	0	-1.12
INTS5	4	0.00036921	0.0013566	0.058337	438	4	-1.1442	0.99962	0.99961	1	18596	0	-1.1442
POLR2G	4	0.00036946	0.0013572	0.058337	439	2	-0.99284	0.17155	0.30687	0.97965	5911	1	-0.99284
USP32	4	0.00036983	0.0013593	0.058337	440	4	-0.73233	0.99963	0.99963	1	18601	0	-0.73233
COPA	4	0.0003707	0.0013629	0.058362	441	4	-1.5267	0.99834	0.99832	1	18440	0	-1.5267
CCNH	4	0.00037239	0.0013692	0.058499	442	3	-1.6736	0.92896	0.92908	1	16525	0	-1.6736
PSMB2	4	0.00037494	0.0013755	0.058635	443	4	-1.3919	0.99963	0.99962	1	18600	0	-1.3919
LARP1	4	0.00037666	0.0013797	0.058681	444	4	-1.2159	0.99962	0.99962	1	18599	0	-1.2159
PHF5A	4	0.00038107	0.0013986	0.059306	445	3	-1.8418	0.31443	0.45591	1	8342	1	-1.8418
SRSF3	4	0.00038191	0.0014007	0.059306	446	3	-1.5933	0.93738	0.93744	1	16706	0	-1.5933
DDT	4	0.00038577	0.0014101	0.059572	447	4	-0.83257	0.99961	0.99961	1	18595	0	-0.83257
MOCS3	4	0.00038694	0.0014143	0.059616	448	4	-1.8585	0.99961	0.99961	1	18593	0	-1.8585
CHAF1A	4	0.00038957	0.0014264	0.059941	449	4	-1.3857	0.99961	0.99961	1	18592	0	-1.3857
UBA1	4	0.0003912	0.0014316	0.059941	450	3	-1.7367	0.35123	0.49429	1	9013	1	-1.7367
TACC3	4	0.00039201	0.0014353	0.059941	451	4	-1.9244	0.99484	0.99485	1	18227	0	-1.9244
ACTR2	4	0.00039218	0.0014358	0.059941	452	3	-1.119	0.9219	0.92204	1	16381	0	-1.119
ADSL	4	0.00039285	0.0014379	0.059941	453	4	-2.1171	0.9996	0.99959	1	18587	0	-2.1171
SUPT5H	4	0.00039459	0.0014452	0.060115	454	4	-1.33	0.99961	0.9996	1	18590	0	-1.33
UQCRH	4	0.00039735	0.0014515	0.060244	455	1	0.35819	0.022439	0.064485	0.754455	1611	3	0.35819
G6PD	4	0.00039996	0.0014605	0.060481	456	4	-0.90922	0.9996	0.99959	1	18589	0	-0.90922
AQP7	4	0.00040224	0.0014673	0.06063	457	2	-1.1481	0.33371	0.47593	1	8692	1	-1.1481
NLE1	4	0.00040357	0.0014725	0.060714	458	4	-1.2899	0.9996	0.99959	1	18588	0	-1.2899
NOC4L	4	0.00041027	0.0014993	0.061634	459	3	-1.3638	0.97862	0.97875	1	17725	0	-1.3638
UXT	4	0.00041086	0.0015013	0.061634	460	4	-1.0494	0.99959	0.99959	1	18586	0	-1.0494
HAUS7	4	0.00042436	0.0015443	0.063261	461	3	-1.1814	0.46962	0.59449	1	10670	1	-1.1814
CGB1	4	0.00042668	0.0015554	0.063437	462	4	-1.2095	0.99957	0.99957	1	18585	0	-1.2095
COX17	4	0.0004268	0.0015554	0.063437	463	4	-1.5257	0.99926	0.99927	1	18528	0	-1.5257
EHMT2	4	0.00043382	0.0015837	0.064452	464	4	-1.2625	0.99927	0.99928	1	18530	0	-1.2625
SEH1L	4	0.00043989	0.0016052	0.065187	465	4	-2.2102	0.99956	0.99956	1	18582	0	-2.2102
SF3B2	4	0.00044269	0.0016141	0.065408	466	3	-1.3845	0.62682	0.67465	1	11968	1	-1.3845
CHMP3	4	0.00044484	0.0016267	0.065744	467	3	-1.5425	0.15407	0.28837	0.967085	5626	1	-1.5425
SNAPIN	4	0.0004462	0.0016335	0.065744	468	4	-0.79652	0.99955	0.99955	1	18581	0	-0.79652
GINS2	4	0.00044699	0.001635	0.065744	469	4	-1.2944	0.99954	0.99954	1	18579	0	-1.2944
ENPP7	4	0.00044799	0.0016398	0.065744	470	4	-0.5765	0.99955	0.99955	1	18580	0	-0.5765
GTF2H4	4	0.00044807	0.0016398	0.065744	471	3	-1.1298	0.71921	0.73439	1	12988	1	-1.1298
RPS13	4	0.00045032	0.001655	0.066213	472	4	-1.9788	0.99848	0.99845	1	18451	0	-1.9788
RPL3	4	0.00045948	0.0016838	0.067224	473	3	-2.1747	0.98624	0.98622	1	17931	0	-2.1747
ALDOA	4	0.00046227	0.0016959	0.067563	474	4	-1.7026	0.99391	0.99394	1	18184	0	-1.7026
TIMM13	4	0.00046448	0.0017053	0.067796	475	4	-1.4631	0.99165	0.99168	1	18101	0	-1.4631
ARL17A	4	0.00046604	0.0017126	0.067847	476	4	-1.0769	0.99953	0.99954	1	18578	0	-1.0769
MAK16	4	0.00046705	0.0017174	0.067847	477	4	-1.2197	0.99953	0.99953	1	18577	0	-1.2197
VARS2	4	0.00046706	0.0017174	0.067847	478	4	-2.2841	0.99382	0.99385	1	18177	0	-2.2841
PCBP1	4	0.0004704	0.0017299	0.068201	479	3	-1.8198	0.98426	0.98424	1	17876	0	-1.8198
TCEB3C	4	0.00047314	0.0017378	0.068368	480	4	-0.73974	0.99953	0.99953	1	18576	0	-0.73974
CYC1	4	0.00047638	0.0017483	0.068638	481	3	-1.6927	0.97373	0.97384	1	17582	0	-1.6927
SNRPG	4	0.00047825	0.0017556	0.068783	482	4	-1.4807	0.99772	0.99772	1	18393	0	-1.4807
FAM25G	4	0.00048619	0.0017808	0.069625	483	4	-1.1555	0.99951	0.99951	1	18574	0	-1.1555
SNRNP27	4	0.00048886	0.0017876	0.069747	484	3	-1.1586	0.1101	0.23274	0.932937	4708	1	-1.1586
PRELID1	4	0.00049021	0.0017944	0.069868	485	3	-1.374	0.7221	0.73648	1	13026	1	-1.374
ANAPC1	4	0.00049345	0.0018065	0.070149	486	3	-1.5146	0.79122	0.79249	1	14020	1	-1.5146
GOLGA6L1	4	0.00049448	0.0018107	0.070149	487	4	-2.1452	0.99533	0.99533	1	18242	0	-2.1452
DHX15	4	0.00049499	0.0018128	0.070149	488	4	-1.2999	0.99812	0.99812	1	18424	0	-1.2999
SMN1	4	0.00049951	0.0018301	0.070674	489	4	-0.82154	0.9995	0.9995	1	18572	0	-0.82154
AK2	4	0.00050164	0.001839	0.070749	490	4	-1.0479	0.9995	0.9995	1	18571	0	-1.0479
PSMD7	4	0.00050233	0.0018395	0.070749	491	4	-2.2922	0.99655	0.99658	1	18302	0	-2.2922
PLK4	4	0.0005061	0.001849	0.070967	492	4	-1.1756	0.99949	0.9995	1	18570	0	-1.1756
ANKRD20A1	4	0.00051173	0.0018699	0.071453	493	3	-1.2427	0.16518	0.30013	0.976329	5801	1	-1.2427
SOD2	4	0.00051238	0.0018715	0.071453	494	4	-1.329	0.99949	0.99949	1	18568	0	-1.329
PUF60	4	0.00051318	0.0018752	0.071453	495	3	-1.1353	0.82999	0.82997	1	14688	0	-1.1353
CDC23	4	0.00051367	0.0018768	0.071453	496	3	-1.9345	0.49513	0.60622	1	10843	1	-1.9345
UPF1	4	0.00051763	0.0018914	0.071802	497	3	-2.1649	0.49402	0.6057	1	10833	1	-2.1649
ELAC2	4	0.00051842	0.0018935	0.071802	498	3	-0.92004	0.58784	0.65263	1	11612	1	-0.92004
EXOSC2	4	0.00052047	0.0019051	0.072095	499	3	-1.4021	0.905	0.90498	1	16061	0	-1.4021
CNOT3	4	0.00052599	0.0019203	0.072479	500	4	-2.0597	0.99853	0.9985	1	18454	0	-2.0597
GTPBP4	4	0.00052679	0.0019229	0.072479	501	3	-1.781	0.89761	0.89752	1	15924	0	-1.781
TOMM40	4	0.00052845	0.0019271	0.072492	502	4	-0.92703	0.99947	0.99948	1	18566	0	-0.92703
PGS1	4	0.00053271	0.0019439	0.072978	503	4	-0.75796	0.99947	0.99948	1	18565	0	-0.75796
RPL11	4	0.00053525	0.0019507	0.073089	504	3	-1.6917	0.88322	0.88321	1	15669	0	-1.6917
SNRNP200	4	0.00053625	0.0019564	0.073159	505	4	-1.3362	0.99946	0.99947	1	18564	0	-1.3362
PTP4A2	4	0.0005389	0.0019633	0.073269	506	4	-0.7609	0.99942	0.99944	1	18552	0	-0.7609
WDR77	4	0.00054175	0.0019727	0.073343	507	3	-2.4067	0.59724	0.65778	1	11689	1	-2.4067
C17orf58	4	0.00054187	0.0019737	0.073343	508	4	-0.96139	0.99946	0.99947	1	18561	0	-0.96139
SF1	4	0.00054298	0.0019769	0.073343	509	4	-1.5946	0.99921	0.99921	1	18519	0	-1.5946
GTF2H1	4	0.00054944	0.0019984	0.073995	510	4	-0.76571	0.99945	0.99946	1	18560	0	-0.76571
NOP2	4	0.00056032	0.0020451	0.075575	511	3	-1.4475	0.97089	0.97095	1	17504	0	-1.4475
NELFB	4	0.00056157	0.0020529	0.075686	512	4	-1.0301	0.99886	0.99885	1	18480	0	-1.0301
SLC25A22	4	0.00056229	0.0020561	0.075686	513	4	-1.3223	0.99944	0.99945	1	18559	0	-1.3223
TMEM41B	4	0.00056492	0.0020702	0.076058	514	3	-1.1776	0.38126	0.52555	1	9539	1	-1.1776
GTF2A2	4	0.00056851	0.0020873	0.076421	515	4	-0.92155	0.99943	0.99944	1	18557	0	-0.92155
ZNF384	4	0.00056949	0.0020901	0.076421	516	4	-0.91085	0.99943	0.99944	1	18556	0	-0.91085
ATXN2L	4	0.00056988	0.0020922	0.076421	517	4	-1.2747	0.99943	0.99944	1	18555	0	-1.2747
NEDD1	4	0.00057655	0.0021137	0.076947	518	4	-1.0669	0.99942	0.99944	1	18553	0	-1.0669
PAICS	4	0.00057717	0.0021148	0.076947	519	3	-1.5261	0.96959	0.96961	1	17468	0	-1.5261
KIF23	4	0.00058315	0.0021316	0.077409	520	3	-1.2981	0.11325	0.2384	0.937324	4800	1	-1.2981
AARS	4	0.00058521	0.0021373	0.077469	521	3	-1.0569	0.9765	0.97664	1	17648	0	-1.0569
ATP1A1	4	0.00058917	0.0021499	0.077776	522	3	-2.4154	0.8114	0.81139	1	14354	1	-2.4154
ALYREF	4	0.00059298	0.002162	0.078063	523	3	-1.3545	0.7345	0.74556	1	13187	1	-1.3545
TELO2	4	0.00059653	0.0021735	0.078329	524	3	-1.1845	0.41415	0.55991	1	10092	1	-1.1845
ARID1B	4	0.00059997	0.0021877	0.07854	525	4	-1.03	0.9994	0.99942	1	18551	0	-1.03
C1orf131	4	0.00060001	0.0021877	0.07854	526	3	-1.6292	0.56292	0.63931	1	11385	1	-1.6292
ILF2	4	0.00060176	0.0021934	0.078597	527	3	-1.0111	0.98448	0.98446	1	17881	0	-1.0111
F8A1	4	0.00060465	0.0022013	0.078618	528	4	-0.58347	0.9994	0.99941	1	18550	0	-0.58347
NDUFB7	4	0.00060486	0.0022023	0.078618	529	4	-1.0199	0.9994	0.99941	1	18549	0	-1.0199
PSMA3	4	0.00061187	0.0022296	0.079441	530	3	-2.0247	0.42651	0.57282	1	10327	1	-2.0247
XRCC6	4	0.00061453	0.0022401	0.079589	531	3	-1.1403	0.94261	0.94266	1	16831	0	-1.1403
HYOU1	4	0.00061497	0.0022422	0.079589	532	3	-1.0832	0.49519	0.60625	1	10845	1	-1.0832
YPEL1	4	0.00061783	0.0022543	0.079867	533	4	-0.93721	0.99938	0.9994	1	18548	0	-0.93721
IDH3A	4	0.00062031	0.0022642	0.08007	534	3	-1.5789	0.2557	0.39463	1	7305	1	-1.5789
TBCD	4	0.00062433	0.0022737	0.080254	535	4	-1.3752	0.9989	0.99888	1	18486	0	-1.3752
NDUFA11	4	0.00062839	0.0022883	0.080508	536	4	-1.109	0.99937	0.99938	1	18546	0	-1.109
PSMC2	4	0.00062938	0.0022894	0.080508	537	3	-1.5383	0.73328	0.74467	1	13165	1	-1.5383
VPS33A	4	0.00063878	0.002325	0.08161	538	4	-0.84377	0.99899	0.99897	1	18492	0	-0.84377
ARL2	4	0.0006406	0.0023303	0.081642	539	3	-1.2893	0.94828	0.94832	1	16959	0	-1.2893
MED26	4	0.00064425	0.002345	0.081926	540	4	-0.90545	0.9925	0.99252	1	18127	0	-0.90545
VPS13D	4	0.00064517	0.0023471	0.081926	541	3	-1.555	0.88417	0.88415	1	15682	0	-1.555
ALAS1	4	0.00064979	0.0023638	0.082359	542	4	-0.91855	0.99935	0.99937	1	18545	0	-0.91855
CYP51A1	4	0.0006539	0.0023775	0.082596	543	3	-0.87394	0.10382	0.22154	0.92515	4519	1	-0.87394
RARS	4	0.00065482	0.0023806	0.082596	544	3	-1.3373	0.13598	0.26934	0.952487	5338	1	-1.3373
RPS19BP1	4	0.00065575	0.0023838	0.082596	545	3	-1.121	0.37249	0.51644	1	9400	1	-1.121
CARS	4	0.00065853	0.0023932	0.082771	546	4	-1.3386	0.99886	0.99885	1	18481	0	-1.3386
SMARCB1	4	0.00066722	0.0024247	0.083706	547	4	-1.5232	0.99933	0.99935	1	18544	0	-1.5232
RPL17	4	0.00067181	0.0024414	0.084131	548	4	-2.0193	0.99914	0.99914	1	18506	0	-2.0193
BAP1	4	0.00067406	0.0024477	0.084194	549	4	-1.1607	0.99933	0.99934	1	18543	0	-1.1607
NDUFB8	4	0.00067784	0.0024661	0.084671	550	4	-1.184	0.99932	0.99934	1	18542	0	-1.184
UBR4	4	0.00068105	0.0024797	0.084985	551	3	-1.1857	0.83658	0.83654	1	14815	0	-1.1857
CENPK	4	0.00068544	0.0024933	0.085197	552	4	-1.3319	0.99931	0.99933	1	18541	0	-1.3319
GTPBP2	4	0.00068611	0.0024949	0.085197	553	4	-1.3545	0.99931	0.99933	1	18540	0	-1.3545
ATF7	4	0.00068819	0.0025022	0.085293	554	4	-0.89049	0.99059	0.99058	1	18071	0	-0.89049
ZNF407	4	0.00070243	0.0025526	0.086852	555	4	-1.4972	0.9993	0.99931	1	18537	0	-1.4972
SAFB	4	0.00070698	0.002573	0.08739	556	4	-1.0542	0.99725	0.99724	1	18352	0	-1.0542
LDLR	4	0.000713	0.0025987	0.088039	557	4	-0.733	0.99929	0.9993	1	18536	0	-0.733
ST20	4	0.00071514	0.002605	0.088039	558	1	0.3169	0.03851	0.097609	0.8262	2230	3	0.3169
DNLZ	4	0.00071772	0.0026092	0.088039	559	3	-1.3846	0.93789	0.93793	1	16718	0	-1.3846
RBMX	4	0.00071821	0.0026108	0.088039	560	3	-0.91877	0.90464	0.9046	1	16057	0	-0.91877
ASH2L	4	0.00072136	0.0026239	0.088324	561	4	-0.91444	0.99928	0.99929	1	18534	0	-0.91444
SLU7	4	0.0007261	0.0026375	0.08859	562	3	-1.58	0.67942	0.70716	1	12537	1	-1.58
DNAJC9	4	0.00072698	0.0026412	0.08859	563	4	-1.8326	0.99927	0.99928	1	18533	0	-1.8326
FLNC	4	0.00073145	0.002659	0.08903	564	4	-0.73776	0.99927	0.99928	1	18532	0	-0.73776
TMEM104	4	0.00073617	0.00268	0.089573	565	4	-0.99756	0.99926	0.99927	1	18529	0	-0.99756
RPL7A	4	0.00074054	0.0026894	0.08973	566	3	-1.9472	0.73244	0.74407	1	13157	1	-1.9472
CEBPZ	4	0.00074808	0.0027141	0.090392	567	3	-1.3695	0.98145	0.98146	1	17801	0	-1.3695
NOP14	4	0.00075193	0.0027298	0.090597	568	4	-1.3103	0.99925	0.99925	1	18527	0	-1.3103
URI1	4	0.00075197	0.0027298	0.090597	569	3	-1.5683	0.85147	0.85134	1	15084	0	-1.5683
MRPS14	4	0.00075516	0.0027419	0.090837	570	4	-1.4376	0.98821	0.98822	1	17996	0	-1.4376
LETM1	4	0.00075869	0.0027539	0.091077	571	4	-0.86255	0.99924	0.99925	1	18526	0	-0.86255
NDUFB9	4	0.00076087	0.0027628	0.091156	572	4	-1.1717	0.99924	0.99924	1	18525	0	-1.1717
ARMC7	4	0.00076229	0.002766	0.091156	573	4	-1.0515	0.99519	0.99518	1	18238	0	-1.0515
PSMD14	4	0.0007681	0.002788	0.091597	574	3	-0.67127	0.77804	0.7807	1	13812	1	-0.67127
SEMA4B	4	0.00076867	0.002789	0.091597	575	4	-0.68883	0.99923	0.99923	1	18523	0	-0.68883
THAP11	4	0.00077255	0.0028016	0.091824	576	3	-1.2014	0.9587	0.95871	1	17185	0	-1.2014
ATP6AP1	4	0.00077382	0.0028063	0.091824	577	4	-1.6787	0.99923	0.99923	1	18522	0	-1.6787
GLRX3	4	0.0007748	0.0028105	0.091824	578	4	-1.2265	0.99923	0.99923	1	18521	0	-1.2265
ORC3	4	0.00078082	0.0028294	0.092276	579	3	-1.5054	0.52123	0.61855	1	11044	1	-1.5054
TBCC	4	0.00078206	0.0028341	0.092276	580	2	-1.4486	0.72218	0.73655	1	13028	1	-1.4486
SMG8	4	0.00078519	0.0028415	0.092355	581	4	-0.53824	0.99921	0.99922	1	18520	0	-0.53824
SMC1A	4	0.00078707	0.0028514	0.092519	582	4	-1.0128	0.99841	0.99839	1	18443	0	-1.0128
FNTA	4	0.00078922	0.0028588	0.092519	583	2	-1.2501	0.97629	0.97644	1	17642	0	-1.2501
STAT5B	4	0.00079167	0.002864	0.092519	584	4	-0.80237	0.99921	0.99921	1	18518	0	-0.80237
ISCA2	4	0.00079217	0.0028661	0.092519	585	4	-1.5076	0.99921	0.99921	1	18517	0	-1.5076
COPB1	4	0.00079596	0.0028813	0.092851	586	3	-0.85928	0.65877	0.694	1	12310	1	-0.85928
EIF2B3	4	0.00080147	0.0029023	0.093349	587	4	-1.0352	0.9992	0.9992	1	18516	0	-1.0352
IKBKAP	4	0.00080365	0.0029117	0.093349	588	3	-1.6056	0.97238	0.9725	1	17540	0	-1.6056
NOL12	4	0.00080399	0.0029128	0.093349	589	4	-0.82201	0.9992	0.99919	1	18515	0	-0.82201
KRTAP2-3	4	0.00080805	0.0029201	0.093349	590	4	-0.61923	0.99919	0.99919	1	18514	0	-0.61923
NUS1	4	0.00080957	0.0029248	0.093349	591	4	-1.3094	0.99919	0.99919	1	18513	0	-1.3094
SEPT5	4	0.00081023	0.0029264	0.093349	592	3	-1.2058	0.92168	0.92181	1	16376	0	-1.2058
AGAP4	4	0.00081289	0.0029364	0.093508	593	3	-1.9597	0.96937	0.96939	1	17463	0	-1.9597
FAM60A	4	0.0008177	0.0029484	0.093734	594	4	-1.1408	0.99875	0.99874	1	18473	0	-1.1408
SYS1	4	0.00082106	0.0029626	0.094026	595	3	-1.8346	0.93619	0.93621	1	16686	0	-1.8346
MARS2	4	0.00082628	0.0029836	0.094101	596	4	-1.5152	0.99864	0.9986	1	18465	0	-1.5152
TPX2	4	0.00082662	0.0029841	0.094101	597	4	-0.98722	0.99917	0.99917	1	18512	0	-0.98722
EIF3C	4	0.00082933	0.002994	0.094101	598	4	-2.0324	0.99917	0.99917	1	18511	0	-2.0324
KLHDC10	4	0.00082985	0.0029956	0.094101	599	4	-0.68767	0.99917	0.99917	1	18510	0	-0.68767
WDR24	4	0.00083006	0.0029967	0.094101	600	4	-0.99368	0.99882	0.9988	1	18476	0	-0.99368
SS18L2	4	0.00083104	0.0029998	0.094101	601	4	-1.6967	0.99712	0.99713	1	18342	0	-1.6967
PPP1R11	4	0.00083114	0.0029998	0.094101	602	3	-1.2158	0.87656	0.87654	1	15536	0	-1.2158
NOP10	4	0.00083493	0.0030155	0.094437	603	3	-1.1527	0.93828	0.93829	1	16727	0	-1.1527
PDCD11	4	0.00083922	0.0030318	0.09459	604	4	-0.74607	0.99916	0.99915	1	18509	0	-0.74607
PTPMT1	4	0.00084027	0.0030349	0.09459	605	4	-1.6741	0.99614	0.99614	1	18281	0	-1.6741
CCT3	4	0.00084036	0.0030355	0.09459	606	4	-1.7144	0.99744	0.99743	1	18370	0	-1.7144
EIF3I	4	0.00084527	0.0030538	0.095005	607	3	-1.1191	0.071518	0.16215	0.894784	3418	1	-1.1191
UTP15	4	0.00085239	0.0030816	0.095712	608	4	-1.3525	0.99885	0.99883	1	18478	0	-1.3525
DCTN5	4	0.000855	0.0030921	0.09582	609	4	-0.78469	0.99914	0.99914	1	18507	0	-0.78469
COX11	4	0.00085569	0.0030952	0.09582	610	4	-1.1443	0.993	0.99302	1	18150	0	-1.1443
EXOSC4	4	0.00086076	0.0031141	0.096247	611	3	-1.157	0.97104	0.97112	1	17510	0	-1.157
EXOSC3	4	0.00086509	0.0031293	0.096498	612	3	-1.6262	0.97305	0.97316	1	17561	0	-1.6262
WDHD1	4	0.00086565	0.0031325	0.096498	613	3	-1.1411	0.58254	0.6497	1	11561	1	-1.1411
VPS25	4	0.00087203	0.0031571	0.097099	614	3	-1.9995	0.77727	0.78004	1	13796	1	-1.9995
ACTB	4	0.000874	0.003166	0.097215	615	4	-1.0209	0.99798	0.99798	1	18415	0	-1.0209
DHX8	4	0.0008764	0.0031755	0.097346	616	4	-1.4635	0.99912	0.99912	1	18505	0	-1.4635
TPR	4	0.00088353	0.0032074	0.098167	617	4	-1.1495	0.99787	0.99786	1	18403	0	-1.1495
RAD1	4	0.00088635	0.0032185	0.098191	618	3	-0.84101	0.92535	0.92547	1	16448	0	-0.84101
NDUFA1	4	0.00088997	0.0032274	0.098191	619	4	-0.7877	0.99911	0.99911	1	18504	0	-0.7877
BANP	4	0.00089087	0.0032279	0.098191	620	4	-1.6941	0.99796	0.99796	1	18412	0	-1.6941
CD2BP2	4	0.00089298	0.0032337	0.098191	621	4	-0.85234	0.99911	0.9991	1	18503	0	-0.85234
MTG1	4	0.00089435	0.0032373	0.098191	622	4	-0.65113	0.99911	0.9991	1	18502	0	-0.65113
CASC5	4	0.0008954	0.0032394	0.098191	623	3	-1.2922	0.084927	0.18738	0.909173	3890	1	-1.2922
PTPN6	4	0.00089682	0.0032447	0.098193	624	4	-1.1929	0.9991	0.9991	1	18501	0	-1.1929
PRAMEF5	4	0.00090054	0.0032541	0.098321	625	3	-1.3938	0.7703	0.77415	1	13708	1	-1.3938
EIF3H	4	0.00090822	0.0032756	0.098812	626	2	-1.0291	0.33249	0.47469	1	8669	2	-1.0291
RPN1	4	0.00092697	0.0033474	0.100818	627	3	-0.75589	0.88086	0.88084	1	15616	0	-0.75589
TSPAN31	4	0.00093135	0.0033632	0.10113	628	4	-0.63988	0.99907	0.99906	1	18500	0	-0.63988
CDC7	4	0.00093629	0.0033815	0.101513	629	4	-1.7565	0.99906	0.99905	1	18498	0	-1.7565
EIF3A	4	0.0009373	0.0033868	0.101513	630	4	-0.70914	0.99906	0.99905	1	18499	0	-0.70914
PSMD6	4	0.00093925	0.003392	0.101513	631	2	-0.99221	0.92628	0.9264	1	16468	0	-0.99221
RBBP4	4	0.00094685	0.0034156	0.102057	632	3	-1.0514	0.63904	0.68189	1	12099	1	-1.0514
SHISA4	4	0.00095474	0.0034439	0.10274	633	4	-1.1328	0.99905	0.99904	1	18497	0	-1.1328
BAG6	4	0.00096181	0.0034712	0.10339	634	4	-0.68656	0.99904	0.99903	1	18496	0	-0.68656
PSMC6	4	0.00097298	0.0035079	0.104319	635	3	-1.4175	0.97097	0.97104	1	17507	0	-1.4175
IPO13	4	0.00097538	0.0035152	0.104373	636	4	-1.1291	0.99534	0.99533	1	18243	0	-1.1291
[truncated: 18,248 more rows]

## Sheet: JSC-1
id	num	neg|score	neg|p-value	neg|fdr	neg|rank	neg|goodsgrna	neg|lfc	pos|score	pos|p-value	pos|fdr	pos|rank	pos|goodsgrna	pos|lfc
[truncated: 18,884 more rows]

[truncated: 9 more sheets: BCBL-1pool, BCBL-1clone, BC-3, GECKO_BC-3, GECKO_BCBL-1, APK-1, VG-1, KMS-12-BM, GECKO_BJAB]
